# Supplementary material for: Construction and Validation of a 13-Gene Signature for Prognosis Prediction in Medulloblastoma
Source: Front Genet. 2020 May 19;11:429. doi: 10.3389/fgene.2020.00429 (PMC7249855; doi:10.3389/fgene.2020.00429)
Supplement: Supplementary file 1 [file Data_Sheet_1.xlsx]

## Sheet: Supplementary table 1
Supplementary table 1. OS-related genes
Ensembl ID	SYMBOL	P.Value	Description
ENSG00000167740	CYB5D2	8.61775e-07	cytochrome b5 domain containing 2 [Source:HGNC Symbol;Acc:HGNC:28471]
ENSG00000114302	PRKAR2A	3.346e-06	protein kinase, cAMP-dependent, regulatory, type II, alpha [Source:HGNC Symbol;Acc:HGNC:9391]
ENSG00000129625	REEP5	4.30913e-06	receptor accessory protein 5 [Source:HGNC Symbol;Acc:HGNC:30077]
ENSG00000103888	CEMIP	5.7015e-06	cell migration inducing protein, hyaluronan binding [Source:HGNC Symbol;Acc:HGNC:29213]
ENSG00000182379	NXPH4	6.32488e-06	neurexophilin 4 [Source:HGNC Symbol;Acc:HGNC:8078]
ENSG00000186838	NA	7.10959e-06	selenoprotein V [Source:EntrezGene;Acc:348303]
ENSG00000188089	PLA2G4E	7.4108e-06	phospholipase A2, group IVE [Source:HGNC Symbol;Acc:HGNC:24791]
ENSG00000164512	ANKRD55	7.43252e-06	ankyrin repeat domain 55 [Source:HGNC Symbol;Acc:HGNC:25681]
ENSG00000141696	LEPREL4	1.18563e-05	leprecan-like 4 [Source:HGNC Symbol;Acc:HGNC:16946]
ENSG00000120594	PLXDC2	1.25175e-05	plexin domain containing 2 [Source:HGNC Symbol;Acc:HGNC:21013]
ENSG00000189227	C15orf61	1.63435e-05	chromosome 15 open reading frame 61 [Source:HGNC Symbol;Acc:HGNC:34453]
ENSG00000135801	TAF5L	1.76737e-05	TAF5-like RNA polymerase II, p300/CBP-associated factor (PCAF)-associated factor, 65kDa [Source:HGNC Symbol;Acc:HGNC:17304]
ENSG00000175826	CTDNEP1	2.13922e-05	CTD nuclear envelope phosphatase 1 [Source:HGNC Symbol;Acc:HGNC:19085]
ENSG00000183914	DNAH2	2.43229e-05	dynein, axonemal, heavy chain 2 [Source:HGNC Symbol;Acc:HGNC:2948]
ENSG00000180626	ZNF594	2.44594e-05	zinc finger protein 594 [Source:HGNC Symbol;Acc:HGNC:29392]
ENSG00000176769	TCERG1L	2.56544e-05	transcription elongation regulator 1-like [Source:HGNC Symbol;Acc:HGNC:23533]
ENSG00000211979	IGHV7-81	2.70861e-05	immunoglobulin heavy variable 7-81 (non-functional) [Source:HGNC Symbol;Acc:HGNC:5669]
ENSG00000167780	SOAT2	3.40548e-05	sterol O-acyltransferase 2 [Source:HGNC Symbol;Acc:HGNC:11178]
ENSG00000213983	AP1G2	3.52311e-05	adaptor-related protein complex 1, gamma 2 subunit [Source:HGNC Symbol;Acc:HGNC:556]
ENSG00000130511	SSBP4	3.89446e-05	single stranded DNA binding protein 4 [Source:HGNC Symbol;Acc:HGNC:15676]
ENSG00000104964	AES	4.19803e-05	amino-terminal enhancer of split [Source:HGNC Symbol;Acc:HGNC:307]
ENSG00000104998	IL27RA	4.46235e-05	interleukin 27 receptor, alpha [Source:HGNC Symbol;Acc:HGNC:17290]
ENSG00000159714	ZDHHC1	4.65928e-05	zinc finger, DHHC-type containing 1 [Source:HGNC Symbol;Acc:HGNC:17916]
ENSG00000168016	TRANK1	4.67443e-05	tetratricopeptide repeat and ankyrin repeat containing 1 [Source:HGNC Symbol;Acc:HGNC:29011]
ENSG00000199932	RNU1-18P	4.93453e-05	RNA, U1 small nuclear 18, pseudogene [Source:HGNC Symbol;Acc:HGNC:41944]
ENSG00000167716	WDR81	5.06526e-05	WD repeat domain 81 [Source:HGNC Symbol;Acc:HGNC:26600]
ENSG00000102174	PHEX	5.99383e-05	phosphate regulating endopeptidase homolog, X-linked [Source:HGNC Symbol;Acc:HGNC:8918]
ENSG00000169992	NLGN2	6.26075e-05	neuroligin 2 [Source:HGNC Symbol;Acc:HGNC:14290]
ENSG00000153815	CMIP	6.3284e-05	c-Maf inducing protein [Source:HGNC Symbol;Acc:HGNC:24319]
ENSG00000147684	NDUFB9	6.40795e-05	NADH dehydrogenase (ubiquinone) 1 beta subcomplex, 9, 22kDa [Source:HGNC Symbol;Acc:HGNC:7704]
ENSG00000178038	ALS2CL	6.7363e-05	ALS2 C-terminal like [Source:HGNC Symbol;Acc:HGNC:20605]
ENSG00000200774	RNU6-478P	7.16479e-05	RNA, U6 small nuclear 478, pseudogene [Source:HGNC Symbol;Acc:HGNC:47441]
ENSG00000108100	CCNY	7.33046e-05	cyclin Y [Source:HGNC Symbol;Acc:HGNC:23354]
ENSG00000130695	CEP85	8.03583e-05	centrosomal protein 85kDa [Source:HGNC Symbol;Acc:HGNC:25309]
ENSG00000180787	ZFP3	8.93907e-05	ZFP3 zinc finger protein [Source:HGNC Symbol;Acc:HGNC:12861]
ENSG00000178343	SHISA3	9.38112e-05	shisa family member 3 [Source:HGNC Symbol;Acc:HGNC:25159]
ENSG00000089558	KCNH4	9.41445e-05	potassium voltage-gated channel, subfamily H (eag-related), member 4 [Source:HGNC Symbol;Acc:HGNC:6253]
ENSG00000182585	EPGN	9.71216e-05	epithelial mitogen [Source:HGNC Symbol;Acc:HGNC:17470]
ENSG00000166165	CKB	0.000110348	creatine kinase, brain [Source:HGNC Symbol;Acc:HGNC:1991]
ENSG00000130997	POLN	0.000112707	polymerase (DNA directed) nu [Source:HGNC Symbol;Acc:HGNC:18870]
ENSG00000272075	NA	0.000113045	Metazoan signal recognition particle RNA [Source:RFAM;Acc:RF00017]
ENSG00000130766	SESN2	0.000114883	sestrin 2 [Source:HGNC Symbol;Acc:HGNC:20746]
ENSG00000139197	PEX5	0.00011715	peroxisomal biogenesis factor 5 [Source:HGNC Symbol;Acc:HGNC:9719]
ENSG00000173848	NET1	0.000122312	neuroepithelial cell transforming 1 [Source:HGNC Symbol;Acc:HGNC:14592]
ENSG00000212589	NA	0.000124596	Small nucleolar RNA SNORA17 [Source:RFAM;Acc:RF00560]
ENSG00000006071	ABCC8	0.000128603	ATP-binding cassette, sub-family C (CFTR/MRP), member 8 [Source:HGNC Symbol;Acc:HGNC:59]
ENSG00000106031	HOXA13	0.000130676	homeobox A13 [Source:HGNC Symbol;Acc:HGNC:5102]
ENSG00000186998	EMID1	0.000131706	EMI domain containing 1 [Source:HGNC Symbol;Acc:HGNC:18036]
ENSG00000168306	ACOX2	0.000144021	acyl-CoA oxidase 2, branched chain [Source:HGNC Symbol;Acc:HGNC:120]
ENSG00000146410	MTFR2	0.000150774	mitochondrial fission regulator 2 [Source:HGNC Symbol;Acc:HGNC:21115]
ENSG00000167721	TSR1	0.00015218	TSR1, 20S rRNA accumulation, homolog (S. cerevisiae) [Source:HGNC Symbol;Acc:HGNC:25542]
ENSG00000110107	PRPF19	0.000153463	pre-mRNA processing factor 19 [Source:HGNC Symbol;Acc:HGNC:17896]
ENSG00000201920	RNA5SP442	0.000156275	RNA, 5S ribosomal pseudogene 442 [Source:HGNC Symbol;Acc:HGNC:43342]
ENSG00000197562	RAB40C	0.00015722	RAB40C, member RAS oncogene family [Source:HGNC Symbol;Acc:HGNC:18285]
ENSG00000148120	C9orf3	0.000158562	chromosome 9 open reading frame 3 [Source:HGNC Symbol;Acc:HGNC:1361]
ENSG00000148842	CNNM2	0.000167206	cyclin and CBS domain divalent metal cation transport mediator 2 [Source:HGNC Symbol;Acc:HGNC:103]
ENSG00000111817	DSE	0.000172829	dermatan sulfate epimerase [Source:HGNC Symbol;Acc:HGNC:21144]
ENSG00000110011	DNAJC4	0.000185585	DnaJ (Hsp40) homolog, subfamily C, member 4 [Source:HGNC Symbol;Acc:HGNC:5271]
ENSG00000171435	KSR2	0.000187708	kinase suppressor of ras 2 [Source:HGNC Symbol;Acc:HGNC:18610]
ENSG00000145757	SPATA9	0.000201707	spermatogenesis associated 9 [Source:HGNC Symbol;Acc:HGNC:22988]
ENSG00000089060	SLC8B1	0.000204616	solute carrier family 8 (sodium/lithium/calcium exchanger), member B1 [Source:HGNC Symbol;Acc:HGNC:26175]
ENSG00000105464	GRIN2D	0.000215805	glutamate receptor, ionotropic, N-methyl D-aspartate 2D [Source:HGNC Symbol;Acc:HGNC:4588]
ENSG00000141499	WRAP53	0.000228411	WD repeat containing, antisense to TP53 [Source:HGNC Symbol;Acc:HGNC:25522]
ENSG00000225663	FAM195B	0.000230086	family with sequence similarity 195, member B [Source:HGNC Symbol;Acc:HGNC:28007]
ENSG00000107959	PITRM1	0.000232409	pitrilysin metallopeptidase 1 [Source:HGNC Symbol;Acc:HGNC:17663]
ENSG00000185527	PDE6G	0.000234812	phosphodiesterase 6G, cGMP-specific, rod, gamma [Source:HGNC Symbol;Acc:HGNC:8789]
ENSG00000072849	DERL2	0.000238304	derlin 2 [Source:HGNC Symbol;Acc:HGNC:17943]
ENSG00000182632	CCNYL2	0.000243352	cyclin Y-like 2 [Source:HGNC Symbol;Acc:HGNC:23495]
ENSG00000133028	SCO1	0.000243748	SCO1 cytochrome c oxidase assembly protein [Source:HGNC Symbol;Acc:HGNC:10603]
ENSG00000137709	POU2F3	0.000249217	POU class 2 homeobox 3 [Source:HGNC Symbol;Acc:HGNC:19864]
ENSG00000047249	ATP6V1H	0.000251451	ATPase, H+ transporting, lysosomal 50/57kDa, V1 subunit H [Source:HGNC Symbol;Acc:HGNC:18303]
ENSG00000135439	AGAP2	0.000251564	ArfGAP with GTPase domain, ankyrin repeat and PH domain 2 [Source:HGNC Symbol;Acc:HGNC:16921]
ENSG00000170043	TRAPPC1	0.000275697	trafficking protein particle complex 1 [Source:HGNC Symbol;Acc:HGNC:19894]
ENSG00000139200	PIANP	0.000276181	PILR alpha associated neural protein [Source:HGNC Symbol;Acc:HGNC:25338]
ENSG00000070785	EIF2B3	0.000278397	eukaryotic translation initiation factor 2B, subunit 3 gamma, 58kDa [Source:HGNC Symbol;Acc:HGNC:3259]
ENSG00000275591	XKR5	0.00028357	XK, Kell blood group complex subunit-related family, member 5 [Source:HGNC Symbol;Acc:HGNC:20782]
ENSG00000164850	GPER1	0.000284943	G protein-coupled estrogen receptor 1 [Source:HGNC Symbol;Acc:HGNC:4485]
ENSG00000019995	ZRANB1	0.000285148	zinc finger, RAN-binding domain containing 1 [Source:HGNC Symbol;Acc:HGNC:18224]
ENSG00000201183	RNVU1-3	0.000288551	RNA, variant U1 small nuclear 3 [Source:HGNC Symbol;Acc:HGNC:48311]
ENSG00000075975	MKRN2	0.000292349	makorin ring finger protein 2 [Source:HGNC Symbol;Acc:HGNC:7113]
ENSG00000162063	CCNF	0.000295503	cyclin F [Source:HGNC Symbol;Acc:HGNC:1591]
ENSG00000189308	LIN54	0.000299822	lin-54 DREAM MuvB core complex component [Source:HGNC Symbol;Acc:HGNC:25397]
ENSG00000158163	DZIP1L	0.000300109	DAZ interacting zinc finger protein 1-like [Source:HGNC Symbol;Acc:HGNC:26551]
ENSG00000134686	PHC2	0.000305206	polyhomeotic homolog 2 (Drosophila) [Source:HGNC Symbol;Acc:HGNC:3183]
ENSG00000169371	SNUPN	0.00030686	snurportin 1 [Source:HGNC Symbol;Acc:HGNC:14245]
ENSG00000170049	KCNAB3	0.000307317	potassium voltage-gated channel, shaker-related subfamily, beta member 3 [Source:HGNC Symbol;Acc:HGNC:6230]
ENSG00000200496	NA	0.000312379	U8 small nucleolar RNA [Source:RFAM;Acc:RF00096]
ENSG00000243883	RN7SL419P	0.000327081	RNA, 7SL, cytoplasmic 419, pseudogene [Source:HGNC Symbol;Acc:HGNC:46435]
ENSG00000174327	SLC16A13	0.000338787	solute carrier family 16, member 13 [Source:HGNC Symbol;Acc:HGNC:31037]
ENSG00000146457	WTAP	0.000345531	Wilms tumor 1 associated protein [Source:HGNC Symbol;Acc:HGNC:16846]
ENSG00000108523	RNF167	0.000347064	ring finger protein 167 [Source:HGNC Symbol;Acc:HGNC:24544]
ENSG00000035115	SH3YL1	0.000349079	SH3 and SYLF domain containing 1 [Source:HGNC Symbol;Acc:HGNC:29546]
ENSG00000165632	TAF3	0.000350952	TAF3 RNA polymerase II, TATA box binding protein (TBP)-associated factor, 140kDa [Source:HGNC Symbol;Acc:HGNC:17303]
ENSG00000183091	NEB	0.000351244	nebulin [Source:HGNC Symbol;Acc:HGNC:7720]
ENSG00000172716	SLFN11	0.000369769	schlafen family member 11 [Source:HGNC Symbol;Acc:HGNC:26633]
ENSG00000158201	ABHD3	0.000388634	abhydrolase domain containing 3 [Source:HGNC Symbol;Acc:HGNC:18718]
ENSG00000155980	KIF5A	0.000396412	kinesin family member 5A [Source:HGNC Symbol;Acc:HGNC:6323]
ENSG00000274749	KRTAP7-1	0.000408012	keratin associated protein 7-1 (gene/pseudogene) [Source:HGNC Symbol;Acc:HGNC:18934]
ENSG00000103381	CPPED1	0.000411926	calcineurin-like phosphoesterase domain containing 1 [Source:HGNC Symbol;Acc:HGNC:25632]
ENSG00000156414	TDRD9	0.000416678	tudor domain containing 9 [Source:HGNC Symbol;Acc:HGNC:20122]
ENSG00000145348	TBCK	0.000422456	TBC1 domain containing kinase [Source:HGNC Symbol;Acc:HGNC:28261]
ENSG00000143847	PPFIA4	0.000432506	protein tyrosine phosphatase, receptor type, f polypeptide (PTPRF), interacting protein (liprin), alpha 4 [Source:HGNC Symbol;Acc:HGNC:9248]
ENSG00000172955	ADH6	0.000436196	alcohol dehydrogenase 6 (class V) [Source:HGNC Symbol;Acc:HGNC:255]
ENSG00000090266	NDUFB2	0.00044367	NADH dehydrogenase (ubiquinone) 1 beta subcomplex, 2, 8kDa [Source:HGNC Symbol;Acc:HGNC:7697]
ENSG00000252070	RNA5SP341	0.000444978	RNA, 5S ribosomal pseudogene 341 [Source:HGNC Symbol;Acc:HGNC:43241]
ENSG00000080824	HSP90AA1	0.00044707	heat shock protein 90kDa alpha (cytosolic), class A member 1 [Source:HGNC Symbol;Acc:HGNC:5253]
ENSG00000253719	ATXN7L3B	0.000451392	ataxin 7-like 3B [Source:HGNC Symbol;Acc:HGNC:37931]
ENSG00000185104	FAF1	0.000458953	Fas (TNFRSF6) associated factor 1 [Source:HGNC Symbol;Acc:HGNC:3578]
ENSG00000164500	C7orf72	0.000463238	chromosome 7 open reading frame 72 [Source:HGNC Symbol;Acc:HGNC:22564]
ENSG00000130816	DNMT1	0.00046535	DNA (cytosine-5-)-methyltransferase 1 [Source:HGNC Symbol;Acc:HGNC:2976]
ENSG00000107897	ACBD5	0.000465806	acyl-CoA binding domain containing 5 [Source:HGNC Symbol;Acc:HGNC:23338]
ENSG00000164099	PRSS12	0.000478867	protease, serine, 12 (neurotrypsin, motopsin) [Source:HGNC Symbol;Acc:HGNC:9477]
ENSG00000198420	FAM115A	0.000479677	family with sequence similarity 115, member A [Source:HGNC Symbol;Acc:HGNC:22201]
ENSG00000147257	GPC3	0.00050686	glypican 3 [Source:HGNC Symbol;Acc:HGNC:4451]
ENSG00000240457	RN7SL472P	0.000512167	RNA, 7SL, cytoplasmic 472, pseudogene [Source:HGNC Symbol;Acc:HGNC:46488]
ENSG00000136161	RCBTB2	0.000519318	regulator of chromosome condensation (RCC1) and BTB (POZ) domain containing protein 2 [Source:HGNC Symbol;Acc:HGNC:1914]
ENSG00000129657	SEC14L1	0.000520401	SEC14-like 1 (S. cerevisiae) [Source:HGNC Symbol;Acc:HGNC:10698]
ENSG00000006695	COX10	0.000520558	cytochrome c oxidase assembly homolog 10 (yeast) [Source:HGNC Symbol;Acc:HGNC:2260]
ENSG00000116793	PHTF1	0.000525779	putative homeodomain transcription factor 1 [Source:HGNC Symbol;Acc:HGNC:8939]
ENSG00000162836	ACP6	0.000531419	acid phosphatase 6, lysophosphatidic [Source:HGNC Symbol;Acc:HGNC:29609]
ENSG00000222468	RNA5SP261	0.000539041	RNA, 5S ribosomal pseudogene 261 [Source:HGNC Symbol;Acc:HGNC:43161]
ENSG00000141837	CACNA1A	0.000539716	calcium channel, voltage-dependent, P/Q type, alpha 1A subunit [Source:HGNC Symbol;Acc:HGNC:1388]
ENSG00000167515	TRAPPC2L	0.000541644	trafficking protein particle complex 2-like [Source:HGNC Symbol;Acc:HGNC:30887]
ENSG00000206978	NA	0.000542517	Y RNA [Source:RFAM;Acc:RF00019]
ENSG00000188738	FSIP2	0.000545179	fibrous sheath interacting protein 2 [Source:HGNC Symbol;Acc:HGNC:21675]
ENSG00000173153	ESRRA	0.000548886	estrogen-related receptor alpha [Source:HGNC Symbol;Acc:HGNC:3471]
ENSG00000072609	CHFR	0.000558902	checkpoint with forkhead and ring finger domains, E3 ubiquitin protein ligase [Source:HGNC Symbol;Acc:HGNC:20455]
ENSG00000004478	FKBP4	0.000562783	FK506 binding protein 4, 59kDa [Source:HGNC Symbol;Acc:HGNC:3720]
ENSG00000132313	MRPL35	0.000570547	mitochondrial ribosomal protein L35 [Source:HGNC Symbol;Acc:HGNC:14489]
ENSG00000140859	KIFC3	0.000571176	kinesin family member C3 [Source:HGNC Symbol;Acc:HGNC:6326]
ENSG00000198901	PRC1	0.000571751	protein regulator of cytokinesis 1 [Source:HGNC Symbol;Acc:HGNC:9341]
ENSG00000065491	TBC1D22B	0.000593416	TBC1 domain family, member 22B [Source:HGNC Symbol;Acc:HGNC:21602]
ENSG00000223260	RN7SKP194	0.000607019	RNA, 7SK small nuclear pseudogene 194 [Source:HGNC Symbol;Acc:HGNC:45918]
ENSG00000181751	C5orf30	0.00061531	chromosome 5 open reading frame 30 [Source:HGNC Symbol;Acc:HGNC:25052]
ENSG00000159618	GPR114	0.000620691	G protein-coupled receptor 114 [Source:HGNC Symbol;Acc:HGNC:19010]
ENSG00000090776	EFNB1	0.000623616	ephrin-B1 [Source:HGNC Symbol;Acc:HGNC:3226]
ENSG00000032389	TSSC1	0.000644481	tumor suppressing subtransferable candidate 1 [Source:HGNC Symbol;Acc:HGNC:12383]
ENSG00000074356	C17orf85	0.000652307	chromosome 17 open reading frame 85 [Source:HGNC Symbol;Acc:HGNC:24612]
ENSG00000129219	PLD2	0.000665334	phospholipase D2 [Source:HGNC Symbol;Acc:HGNC:9068]
ENSG00000111450	STX2	0.000669916	syntaxin 2 [Source:HGNC Symbol;Acc:HGNC:3403]
ENSG00000162458	FBLIM1	0.000675653	filamin binding LIM protein 1 [Source:HGNC Symbol;Acc:HGNC:24686]
ENSG00000023041	ZDHHC6	0.00068426	zinc finger, DHHC-type containing 6 [Source:HGNC Symbol;Acc:HGNC:19160]
ENSG00000201356	RNA5SP500	0.000689383	RNA, 5S ribosomal pseudogene 500 [Source:HGNC Symbol;Acc:HGNC:43400]
ENSG00000263465	SRSF8	0.000694657	serine/arginine-rich splicing factor 8 [Source:HGNC Symbol;Acc:HGNC:16988]
ENSG00000159842	ABR	0.000714686	active BCR-related [Source:HGNC Symbol;Acc:HGNC:81]
ENSG00000157502	MUM1L1	0.000725843	melanoma associated antigen (mutated) 1-like 1 [Source:HGNC Symbol;Acc:HGNC:26583]
ENSG00000118873	RAB3GAP2	0.000742451	RAB3 GTPase activating protein subunit 2 (non-catalytic) [Source:HGNC Symbol;Acc:HGNC:17168]
ENSG00000007255	TRAPPC6A	0.000758895	trafficking protein particle complex 6A [Source:HGNC Symbol;Acc:HGNC:23069]
ENSG00000056736	IL17RB	0.00076096	interleukin 17 receptor B [Source:HGNC Symbol;Acc:HGNC:18015]
ENSG00000119913	TECTB	0.000769391	tectorin beta [Source:HGNC Symbol;Acc:HGNC:11721]
ENSG00000111490	TBC1D30	0.000773711	TBC1 domain family, member 30 [Source:HGNC Symbol;Acc:HGNC:29164]
ENSG00000156026	MCU	0.000777667	mitochondrial calcium uniporter [Source:HGNC Symbol;Acc:HGNC:23526]
ENSG00000162924	REL	0.000781011	v-rel avian reticuloendotheliosis viral oncogene homolog [Source:HGNC Symbol;Acc:HGNC:9954]
ENSG00000037241	RPL26L1	0.000791229	ribosomal protein L26-like 1 [Source:HGNC Symbol;Acc:HGNC:17050]
ENSG00000143554	SLC27A3	0.000792242	solute carrier family 27 (fatty acid transporter), member 3 [Source:HGNC Symbol;Acc:HGNC:10997]
ENSG00000129255	MPDU1	0.00079306	mannose-P-dolichol utilization defect 1 [Source:HGNC Symbol;Acc:HGNC:7207]
ENSG00000133665	DYDC2	0.000798032	DPY30 domain containing 2 [Source:HGNC Symbol;Acc:HGNC:23468]
ENSG00000130734	ATG4D	0.000799397	autophagy related 4D, cysteine peptidase [Source:HGNC Symbol;Acc:HGNC:20789]
ENSG00000166986	MARS	0.000819465	methionyl-tRNA synthetase [Source:HGNC Symbol;Acc:HGNC:6898]
ENSG00000169972	PUSL1	0.000820942	pseudouridylate synthase-like 1 [Source:HGNC Symbol;Acc:HGNC:26914]
ENSG00000141994	DUS3L	0.000825514	dihydrouridine synthase 3-like (S. cerevisiae) [Source:HGNC Symbol;Acc:HGNC:26920]
ENSG00000001167	NFYA	0.000850782	nuclear transcription factor Y, alpha [Source:HGNC Symbol;Acc:HGNC:7804]
ENSG00000156411	C14orf2	0.000857299	chromosome 14 open reading frame 2 [Source:HGNC Symbol;Acc:HGNC:1188]
ENSG00000139053	PDE6H	0.000858148	phosphodiesterase 6H, cGMP-specific, cone, gamma [Source:HGNC Symbol;Acc:HGNC:8790]
ENSG00000162591	MEGF6	0.000860661	multiple EGF-like-domains 6 [Source:HGNC Symbol;Acc:HGNC:3232]
ENSG00000078328	RBFOX1	0.000861063	RNA binding protein, fox-1 homolog (C. elegans) 1 [Source:HGNC Symbol;Acc:HGNC:18222]
ENSG00000225614	ZNF469	0.000863046	zinc finger protein 469 [Source:HGNC Symbol;Acc:HGNC:23216]
ENSG00000152894	PTPRK	0.000875429	protein tyrosine phosphatase, receptor type, K [Source:HGNC Symbol;Acc:HGNC:9674]
ENSG00000138604	GLCE	0.000875689	glucuronic acid epimerase [Source:HGNC Symbol;Acc:HGNC:17855]
ENSG00000256124	LINC01152	0.000878697	long intergenic non-protein coding RNA 1152 [Source:HGNC Symbol;Acc:HGNC:16752]
ENSG00000159239	C2orf81	0.000881805	chromosome 2 open reading frame 81 [Source:HGNC Symbol;Acc:HGNC:34350]
ENSG00000199153	MIR30D	0.000886835	microRNA 30d [Source:HGNC Symbol;Acc:HGNC:31628]
ENSG00000237984	PTENP1	0.000900401	phosphatase and tensin homolog pseudogene 1 (functional) [Source:HGNC Symbol;Acc:HGNC:9589]
ENSG00000120693	SMAD9	0.000908314	SMAD family member 9 [Source:HGNC Symbol;Acc:HGNC:6774]
ENSG00000183323	CCDC125	0.000917391	coiled-coil domain containing 125 [Source:HGNC Symbol;Acc:HGNC:28924]
ENSG00000141391	SLMO1	0.000917887	slowmo homolog 1 (Drosophila) [Source:HGNC Symbol;Acc:HGNC:24639]
ENSG00000171928	TVP23B	0.000921111	trans-golgi network vesicle protein 23 homolog B (S. cerevisiae) [Source:HGNC Symbol;Acc:HGNC:20399]
ENSG00000065357	DGKA	0.000956411	diacylglycerol kinase, alpha 80kDa [Source:HGNC Symbol;Acc:HGNC:2849]
ENSG00000179799	OR7E22P	0.000960252	olfactory receptor, family 7, subfamily E, member 22 pseudogene [Source:HGNC Symbol;Acc:HGNC:8394]
ENSG00000155090	KLF10	0.000962624	Kruppel-like factor 10 [Source:HGNC Symbol;Acc:HGNC:11810]
ENSG00000163749	CCDC158	0.000966203	coiled-coil domain containing 158 [Source:HGNC Symbol;Acc:HGNC:26374]
ENSG00000140382	HMG20A	0.000977373	high mobility group 20A [Source:HGNC Symbol;Acc:HGNC:5001]
ENSG00000160679	CHTOP	0.000988474	chromatin target of PRMT1 [Source:HGNC Symbol;Acc:HGNC:24511]
ENSG00000176387	HSD11B2	0.000994741	hydroxysteroid (11-beta) dehydrogenase 2 [Source:HGNC Symbol;Acc:HGNC:5209]
ENSG00000132388	UBE2G1	0.00102735	ubiquitin-conjugating enzyme E2G 1 [Source:HGNC Symbol;Acc:HGNC:12482]
ENSG00000273802	HIST1H2BG	0.00102751	histone cluster 1, H2bg [Source:HGNC Symbol;Acc:HGNC:4746]
ENSG00000216863	LY86-AS1	0.00103364	LY86 antisense RNA 1 [Source:HGNC Symbol;Acc:HGNC:26593]
ENSG00000102021	LUZP4	0.00104047	leucine zipper protein 4 [Source:HGNC Symbol;Acc:HGNC:24971]
ENSG00000077616	NAALAD2	0.00104066	N-acetylated alpha-linked acidic dipeptidase 2 [Source:HGNC Symbol;Acc:HGNC:14526]
ENSG00000132383	RPA1	0.00104947	replication protein A1, 70kDa [Source:HGNC Symbol;Acc:HGNC:10289]
ENSG00000129197	RPAIN	0.00107072	RPA interacting protein [Source:HGNC Symbol;Acc:HGNC:28641]
ENSG00000011295	TTC19	0.00107248	tetratricopeptide repeat domain 19 [Source:HGNC Symbol;Acc:HGNC:26006]
ENSG00000172071	EIF2AK3	0.0010799	eukaryotic translation initiation factor 2-alpha kinase 3 [Source:HGNC Symbol;Acc:HGNC:3255]
ENSG00000172986	GXYLT2	0.00109024	glucoside xylosyltransferase 2 [Source:HGNC Symbol;Acc:HGNC:33383]
ENSG00000151364	KCTD14	0.00110975	potassium channel tetramerization domain containing 14 [Source:HGNC Symbol;Acc:HGNC:23295]
ENSG00000147535	PPAPDC1B	0.00113415	phosphatidic acid phosphatase type 2 domain containing 1B [Source:HGNC Symbol;Acc:HGNC:25026]
ENSG00000172638	EFEMP2	0.00117928	EGF containing fibulin-like extracellular matrix protein 2 [Source:HGNC Symbol;Acc:HGNC:3219]
ENSG00000174437	ATP2A2	0.00117947	ATPase, Ca++ transporting, cardiac muscle, slow twitch 2 [Source:HGNC Symbol;Acc:HGNC:812]
ENSG00000140455	USP3	0.00118188	ubiquitin specific peptidase 3 [Source:HGNC Symbol;Acc:HGNC:12626]
ENSG00000179058	C9orf50	0.00119268	chromosome 9 open reading frame 50 [Source:HGNC Symbol;Acc:HGNC:23677]
ENSG00000152192	POU4F1	0.00120161	POU class 4 homeobox 1 [Source:HGNC Symbol;Acc:HGNC:9218]
ENSG00000141456	PELP1	0.00121983	proline, glutamate and leucine rich protein 1 [Source:HGNC Symbol;Acc:HGNC:30134]
ENSG00000201894	RNU6-967P	0.00124164	RNA, U6 small nuclear 967, pseudogene [Source:HGNC Symbol;Acc:HGNC:47930]
ENSG00000060749	QSER1	0.0012427	glutamine and serine rich 1 [Source:HGNC Symbol;Acc:HGNC:26154]
ENSG00000176058	TPRN	0.00124686	taperin [Source:HGNC Symbol;Acc:HGNC:26894]
ENSG00000103994	ZNF106	0.00128342	zinc finger protein 106 [Source:HGNC Symbol;Acc:HGNC:12886]
ENSG00000160293	VAV2	0.00128904	vav 2 guanine nucleotide exchange factor [Source:HGNC Symbol;Acc:HGNC:12658]
ENSG00000108590	MED31	0.0012898	mediator complex subunit 31 [Source:HGNC Symbol;Acc:HGNC:24260]
ENSG00000201618	RNA5SP505	0.00129849	RNA, 5S ribosomal pseudogene 505 [Source:HGNC Symbol;Acc:HGNC:43405]
ENSG00000174460	ZCCHC12	0.00130647	zinc finger, CCHC domain containing 12 [Source:HGNC Symbol;Acc:HGNC:27273]
ENSG00000200065	NA	0.00131769	Y RNA [Source:RFAM;Acc:RF00019]
ENSG00000152133	GPATCH11	0.00132936	G patch domain containing 11 [Source:HGNC Symbol;Acc:HGNC:26768]
ENSG00000134684	YARS	0.00134182	tyrosyl-tRNA synthetase [Source:HGNC Symbol;Acc:HGNC:12840]
ENSG00000120437	ACAT2	0.00135409	acetyl-CoA acetyltransferase 2 [Source:HGNC Symbol;Acc:HGNC:94]
ENSG00000166579	NDEL1	0.00135451	nudE neurodevelopment protein 1-like 1 [Source:HGNC Symbol;Acc:HGNC:17620]
ENSG00000111642	CHD4	0.00135713	chromodomain helicase DNA binding protein 4 [Source:HGNC Symbol;Acc:HGNC:1919]
ENSG00000078900	TP73	0.00136559	tumor protein p73 [Source:HGNC Symbol;Acc:HGNC:12003]
ENSG00000040531	CTNS	0.00137426	cystinosin, lysosomal cystine transporter [Source:HGNC Symbol;Acc:HGNC:2518]
ENSG00000223179	RNU6-373P	0.00137465	RNA, U6 small nuclear 373, pseudogene [Source:HGNC Symbol;Acc:HGNC:47336]
ENSG00000178171	AMER3	0.00137618	APC membrane recruitment protein 3 [Source:HGNC Symbol;Acc:HGNC:26771]
ENSG00000199883	RN7SKP90	0.00138069	RNA, 7SK small nuclear pseudogene 90 [Source:HGNC Symbol;Acc:HGNC:45814]
ENSG00000156384	SFR1	0.00140241	SWI5-dependent recombination repair 1 [Source:HGNC Symbol;Acc:HGNC:29574]
ENSG00000232963	HMGN2P20	0.00140366	high mobility group nucleosomal binding domain 2 pseudogene 20 [Source:HGNC Symbol;Acc:HGNC:39385]
ENSG00000102172	SMS	0.00140612	spermine synthase [Source:HGNC Symbol;Acc:HGNC:11123]
ENSG00000175895	PLEKHF2	0.00150317	pleckstrin homology domain containing, family F (with FYVE domain) member 2 [Source:HGNC Symbol;Acc:HGNC:20757]
ENSG00000173376	NDNF	0.00152215	neuron-derived neurotrophic factor [Source:HGNC Symbol;Acc:HGNC:26256]
ENSG00000103510	KAT8	0.00152801	K(lysine) acetyltransferase 8 [Source:HGNC Symbol;Acc:HGNC:17933]
ENSG00000150275	PCDH15	0.00157413	protocadherin-related 15 [Source:HGNC Symbol;Acc:HGNC:14674]
ENSG00000113389	NPR3	0.00157837	natriuretic peptide receptor 3 [Source:HGNC Symbol;Acc:HGNC:7945]
ENSG00000125826	RBCK1	0.001579	RanBP-type and C3HC4-type zinc finger containing 1 [Source:HGNC Symbol;Acc:HGNC:15864]
ENSG00000100271	TTLL1	0.00158845	tubulin tyrosine ligase-like family, member 1 [Source:HGNC Symbol;Acc:HGNC:1312]
ENSG00000128596	CCDC136	0.00159468	coiled-coil domain containing 136 [Source:HGNC Symbol;Acc:HGNC:22225]
ENSG00000171405	XAGE5	0.00159646	X antigen family, member 5 [Source:HGNC Symbol;Acc:HGNC:30930]
ENSG00000198947	DMD	0.00159675	dystrophin [Source:HGNC Symbol;Acc:HGNC:2928]
ENSG00000163424	C3orf30	0.00159859	chromosome 3 open reading frame 30 [Source:HGNC Symbol;Acc:HGNC:26553]
ENSG00000103647	CORO2B	0.00162211	coronin, actin binding protein, 2B [Source:HGNC Symbol;Acc:HGNC:2256]
ENSG00000106484	MEST	0.00163151	mesoderm specific transcript [Source:HGNC Symbol;Acc:HGNC:7028]
ENSG00000237649	KIFC1	0.00164277	kinesin family member C1 [Source:HGNC Symbol;Acc:HGNC:6389]
ENSG00000153237	CCDC148	0.00164819	coiled-coil domain containing 148 [Source:HGNC Symbol;Acc:HGNC:25191]
ENSG00000123983	ACSL3	0.00165078	acyl-CoA synthetase long-chain family member 3 [Source:HGNC Symbol;Acc:HGNC:3570]
ENSG00000104325	DECR1	0.00165993	2,4-dienoyl CoA reductase 1, mitochondrial [Source:HGNC Symbol;Acc:HGNC:2753]
ENSG00000134765	DSC1	0.00168307	desmocollin 1 [Source:HGNC Symbol;Acc:HGNC:3035]
ENSG00000083067	TRPM3	0.00168487	transient receptor potential cation channel, subfamily M, member 3 [Source:HGNC Symbol;Acc:HGNC:17992]
ENSG00000183087	GAS6	0.00168553	growth arrest-specific 6 [Source:HGNC Symbol;Acc:HGNC:4168]
ENSG00000180383	DEFB124	0.00169338	defensin, beta 124 [Source:HGNC Symbol;Acc:HGNC:18104]
ENSG00000166199	ALKBH3	0.00170088	alkB, alkylation repair homolog 3 (E. coli) [Source:HGNC Symbol;Acc:HGNC:30141]
ENSG00000202046	NA	0.00171755	Y RNA [Source:RFAM;Acc:RF00019]
ENSG00000139620	KANSL2	0.00172791	KAT8 regulatory NSL complex subunit 2 [Source:HGNC Symbol;Acc:HGNC:26024]
ENSG00000152102	FAM168B	0.00173207	family with sequence similarity 168, member B [Source:HGNC Symbol;Acc:HGNC:27016]
ENSG00000177839	PCDHB9	0.001734	protocadherin beta 9 [Source:HGNC Symbol;Acc:HGNC:8694]
ENSG00000166152	C16orf78	0.00173703	chromosome 16 open reading frame 78 [Source:HGNC Symbol;Acc:HGNC:28479]
ENSG00000088882	CPXM1	0.00174147	carboxypeptidase X (M14 family), member 1 [Source:HGNC Symbol;Acc:HGNC:15771]
ENSG00000142686	C1orf216	0.00174154	chromosome 1 open reading frame 216 [Source:HGNC Symbol;Acc:HGNC:26800]
ENSG00000201707	RNU6-818P	0.00174639	RNA, U6 small nuclear 818, pseudogene [Source:HGNC Symbol;Acc:HGNC:47781]
ENSG00000144026	ZNF514	0.00175266	zinc finger protein 514 [Source:HGNC Symbol;Acc:HGNC:25894]
ENSG00000111186	WNT5B	0.00175686	wingless-type MMTV integration site family, member 5B [Source:HGNC Symbol;Acc:HGNC:16265]
ENSG00000115289	PCGF1	0.00176619	polycomb group ring finger 1 [Source:HGNC Symbol;Acc:HGNC:17615]
ENSG00000164307	ERAP1	0.00177337	endoplasmic reticulum aminopeptidase 1 [Source:HGNC Symbol;Acc:HGNC:18173]
ENSG00000213145	CRIP1	0.00177875	cysteine-rich protein 1 (intestinal) [Source:HGNC Symbol;Acc:HGNC:2360]
ENSG00000125846	ZNF133	0.00178974	zinc finger protein 133 [Source:HGNC Symbol;Acc:HGNC:12917]
ENSG00000184967	NOC4L	0.00179345	nucleolar complex associated 4 homolog (S. cerevisiae) [Source:HGNC Symbol;Acc:HGNC:28461]
ENSG00000142515	KLK3	0.00182204	kallikrein-related peptidase 3 [Source:HGNC Symbol;Acc:HGNC:6364]
ENSG00000183304	FAM9A	0.00185289	family with sequence similarity 9, member A [Source:HGNC Symbol;Acc:HGNC:18403]
ENSG00000100916	BRMS1L	0.00186396	breast cancer metastasis-suppressor 1-like [Source:HGNC Symbol;Acc:HGNC:20512]
ENSG00000188107	EYS	0.00186431	eyes shut homolog (Drosophila) [Source:HGNC Symbol;Acc:HGNC:21555]
ENSG00000162913	C1orf145	0.0018689	chromosome 1 open reading frame 145 [Source:HGNC Symbol;Acc:HGNC:32047]
ENSG00000200975	RNU1-7P	0.00188801	RNA, U1 small nuclear 7, pseudogene [Source:HGNC Symbol;Acc:HGNC:48306]
ENSG00000071051	NCK2	0.00189194	NCK adaptor protein 2 [Source:HGNC Symbol;Acc:HGNC:7665]
ENSG00000126524	SBDS	0.00190294	Shwachman-Bodian-Diamond syndrome [Source:HGNC Symbol;Acc:HGNC:19440]
ENSG00000188032	C19orf67	0.00190312	chromosome 19 open reading frame 67 [Source:HGNC Symbol;Acc:HGNC:34354]
ENSG00000106460	TMEM106B	0.00190902	transmembrane protein 106B [Source:HGNC Symbol;Acc:HGNC:22407]
ENSG00000102230	PCYT1B	0.00190931	phosphate cytidylyltransferase 1, choline, beta [Source:HGNC Symbol;Acc:HGNC:8755]
ENSG00000165807	PPP1R36	0.00192775	protein phosphatase 1, regulatory subunit 36 [Source:HGNC Symbol;Acc:HGNC:20097]
ENSG00000170419	VSTM2A	0.00193813	V-set and transmembrane domain containing 2A [Source:HGNC Symbol;Acc:HGNC:28499]
ENSG00000107672	NSMCE4A	0.0019399	non-SMC element 4 homolog A (S. cerevisiae) [Source:HGNC Symbol;Acc:HGNC:25935]
ENSG00000108528	SLC25A11	0.00195794	solute carrier family 25 (mitochondrial carrier; oxoglutarate carrier), member 11 [Source:HGNC Symbol;Acc:HGNC:10981]
ENSG00000147234	FRMPD3	0.00196153	FERM and PDZ domain containing 3 [Source:HGNC Symbol;Acc:HGNC:29382]
ENSG00000173114	LRRN3	0.00196316	leucine rich repeat neuronal 3 [Source:HGNC Symbol;Acc:HGNC:17200]
ENSG00000168676	KCTD19	0.00197654	potassium channel tetramerization domain containing 19 [Source:HGNC Symbol;Acc:HGNC:24753]
ENSG00000090273	NUDC	0.00200305	nudC nuclear distribution protein [Source:HGNC Symbol;Acc:HGNC:8045]
ENSG00000105229	PIAS4	0.00200981	protein inhibitor of activated STAT, 4 [Source:HGNC Symbol;Acc:HGNC:17002]
ENSG00000186103	ARGFX	0.00202586	arginine-fifty homeobox [Source:HGNC Symbol;Acc:HGNC:30146]
ENSG00000075213	SEMA3A	0.00203356	sema domain, immunoglobulin domain (Ig), short basic domain, secreted, (semaphorin) 3A [Source:HGNC Symbol;Acc:HGNC:10723]
ENSG00000053254	FOXN3	0.00203507	forkhead box N3 [Source:HGNC Symbol;Acc:HGNC:1928]
ENSG00000075624	ACTB	0.00203563	actin, beta [Source:HGNC Symbol;Acc:HGNC:132]
ENSG00000168439	STIP1	0.00203625	stress-induced phosphoprotein 1 [Source:HGNC Symbol;Acc:HGNC:11387]
ENSG00000186532	SMYD4	0.00204257	SET and MYND domain containing 4 [Source:HGNC Symbol;Acc:HGNC:21067]
ENSG00000144589	STK11IP	0.00204988	serine/threonine kinase 11 interacting protein [Source:HGNC Symbol;Acc:HGNC:19184]
ENSG00000157978	LDLRAP1	0.0020538	low density lipoprotein receptor adaptor protein 1 [Source:HGNC Symbol;Acc:HGNC:18640]
ENSG00000120324	PCDHB10	0.00207162	protocadherin beta 10 [Source:HGNC Symbol;Acc:HGNC:8681]
ENSG00000072778	ACADVL	0.00208183	acyl-CoA dehydrogenase, very long chain [Source:HGNC Symbol;Acc:HGNC:92]
ENSG00000171246	NPTX1	0.00208297	neuronal pentraxin I [Source:HGNC Symbol;Acc:HGNC:7952]
ENSG00000157227	MMP14	0.00211759	matrix metallopeptidase 14 (membrane-inserted) [Source:HGNC Symbol;Acc:HGNC:7160]
ENSG00000160323	ADAMTS13	0.00213191	ADAM metallopeptidase with thrombospondin type 1 motif, 13 [Source:HGNC Symbol;Acc:HGNC:1366]
ENSG00000140564	FURIN	0.00213343	furin (paired basic amino acid cleaving enzyme) [Source:HGNC Symbol;Acc:HGNC:8568]
ENSG00000156282	CLDN17	0.00213964	claudin 17 [Source:HGNC Symbol;Acc:HGNC:2038]
ENSG00000138193	PLCE1	0.00219065	phospholipase C, epsilon 1 [Source:HGNC Symbol;Acc:HGNC:17175]
ENSG00000109971	HSPA8	0.00219106	heat shock 70kDa protein 8 [Source:HGNC Symbol;Acc:HGNC:5241]
ENSG00000108474	PIGL	0.00220872	phosphatidylinositol glycan anchor biosynthesis, class L [Source:HGNC Symbol;Acc:HGNC:8966]
ENSG00000126001	CEP250	0.00222273	centrosomal protein 250kDa [Source:HGNC Symbol;Acc:HGNC:1859]
ENSG00000244066	RN7SL148P	0.00224782	RNA, 7SL, cytoplasmic 148, pseudogene [Source:HGNC Symbol;Acc:HGNC:46164]
ENSG00000197226	TBC1D9B	0.00227608	TBC1 domain family, member 9B (with GRAM domain) [Source:HGNC Symbol;Acc:HGNC:29097]
ENSG00000123552	USP45	0.00227893	ubiquitin specific peptidase 45 [Source:HGNC Symbol;Acc:HGNC:20080]
ENSG00000093072	CECR1	0.00228971	cat eye syndrome chromosome region, candidate 1 [Source:HGNC Symbol;Acc:HGNC:1839]
ENSG00000093217	XYLB	0.00229725	xylulokinase homolog (H. influenzae) [Source:HGNC Symbol;Acc:HGNC:12839]
ENSG00000251235	SNRPCP2	0.00231352	small nuclear ribonucleoprotein polypeptide C pseudogene 2 [Source:HGNC Symbol;Acc:HGNC:49817]
ENSG00000120798	NR2C1	0.00233889	nuclear receptor subfamily 2, group C, member 1 [Source:HGNC Symbol;Acc:HGNC:7971]
ENSG00000148798	INA	0.00234725	internexin neuronal intermediate filament protein, alpha [Source:HGNC Symbol;Acc:HGNC:6057]
ENSG00000126733	DACH2	0.00236882	dachshund family transcription factor 2 [Source:HGNC Symbol;Acc:HGNC:16814]
ENSG00000167695	FAM57A	0.00237243	family with sequence similarity 57, member A [Source:HGNC Symbol;Acc:HGNC:29646]
ENSG00000206832	RNU6V	0.00237419	RNA, U6 small nuclear variant sequence with SNRPE pseudogene sequence [Source:HGNC Symbol;Acc:HGNC:10230]
ENSG00000214013	GANC	0.00237693	glucosidase, alpha; neutral C [Source:HGNC Symbol;Acc:HGNC:4139]
ENSG00000185926	OR4C46	0.00239584	olfactory receptor, family 4, subfamily C, member 46 [Source:HGNC Symbol;Acc:HGNC:31271]
ENSG00000100109	TFIP11	0.00241072	tuftelin interacting protein 11 [Source:HGNC Symbol;Acc:HGNC:17165]
ENSG00000108559	NUP88	0.00241575	nucleoporin 88kDa [Source:HGNC Symbol;Acc:HGNC:8067]
ENSG00000135655	USP15	0.00241624	ubiquitin specific peptidase 15 [Source:HGNC Symbol;Acc:HGNC:12613]
ENSG00000180596	HIST1H2BC	0.00242106	histone cluster 1, H2bc [Source:HGNC Symbol;Acc:HGNC:4757]
ENSG00000176438	SYNE3	0.00242881	spectrin repeat containing, nuclear envelope family member 3 [Source:HGNC Symbol;Acc:HGNC:19861]
ENSG00000174744	BRMS1	0.00244325	breast cancer metastasis suppressor 1 [Source:HGNC Symbol;Acc:HGNC:17262]
ENSG00000014164	ZC3H3	0.00245481	zinc finger CCCH-type containing 3 [Source:HGNC Symbol;Acc:HGNC:28972]
ENSG00000101811	CSTF2	0.00246091	cleavage stimulation factor, 3' pre-RNA, subunit 2, 64kDa [Source:HGNC Symbol;Acc:HGNC:2484]
ENSG00000198879	SFMBT2	0.00246327	Scm-like with four mbt domains 2 [Source:HGNC Symbol;Acc:HGNC:20256]
ENSG00000006015	C19orf60	0.00247143	chromosome 19 open reading frame 60 [Source:HGNC Symbol;Acc:HGNC:26098]
ENSG00000047056	WDR37	0.00247636	WD repeat domain 37 [Source:HGNC Symbol;Acc:HGNC:31406]
ENSG00000118271	TTR	0.00251948	transthyretin [Source:HGNC Symbol;Acc:HGNC:12405]
ENSG00000138650	PCDH10	0.0025344	protocadherin 10 [Source:HGNC Symbol;Acc:HGNC:13404]
ENSG00000207435	RNU6-114P	0.00255091	RNA, U6 small nuclear 114, pseudogene [Source:HGNC Symbol;Acc:HGNC:47077]
ENSG00000276380	NA	0.00255398	ubiquitin-conjugating enzyme E2N-like [Source:EntrezGene;Acc:389898]
ENSG00000207426	NA	0.00256194	Y RNA [Source:RFAM;Acc:RF00019]
ENSG00000162129	CLPB	0.00257254	ClpB caseinolytic peptidase B homolog (E. coli) [Source:HGNC Symbol;Acc:HGNC:30664]
ENSG00000157107	FCHO2	0.00261125	FCH domain only 2 [Source:HGNC Symbol;Acc:HGNC:25180]
ENSG00000186369	LINC00643	0.00261896	long intergenic non-protein coding RNA 643 [Source:HGNC Symbol;Acc:HGNC:44296]
ENSG00000167874	TMEM88	0.00262381	transmembrane protein 88 [Source:HGNC Symbol;Acc:HGNC:32371]
ENSG00000241685	ARPC1A	0.00262784	actin related protein 2/3 complex, subunit 1A, 41kDa [Source:HGNC Symbol;Acc:HGNC:703]
ENSG00000171094	ALK	0.00262832	anaplastic lymphoma receptor tyrosine kinase [Source:HGNC Symbol;Acc:HGNC:427]
ENSG00000166272	WBP1L	0.00265301	WW domain binding protein 1-like [Source:HGNC Symbol;Acc:HGNC:23510]
ENSG00000131264	CDX4	0.0026585	caudal type homeobox 4 [Source:HGNC Symbol;Acc:HGNC:1808]
ENSG00000178921	PFAS	0.00265941	phosphoribosylformylglycinamidine synthase [Source:HGNC Symbol;Acc:HGNC:8863]
ENSG00000160051	IQCC	0.00267742	IQ motif containing C [Source:HGNC Symbol;Acc:HGNC:25545]
ENSG00000178150	ZNF114	0.00268549	zinc finger protein 114 [Source:HGNC Symbol;Acc:HGNC:12894]
ENSG00000150991	UBC	0.0026861	ubiquitin C [Source:HGNC Symbol;Acc:HGNC:12468]
ENSG00000206341	HLA-H	0.00269945	major histocompatibility complex, class I, H (pseudogene) [Source:HGNC Symbol;Acc:HGNC:4965]
ENSG00000205045	SLFN12L	0.00270532	schlafen family member 12-like [Source:HGNC Symbol;Acc:HGNC:33920]
ENSG00000081026	MAGI3	0.00271617	membrane associated guanylate kinase, WW and PDZ domain containing 3 [Source:HGNC Symbol;Acc:HGNC:29647]
ENSG00000252410	RNU5B-3P	0.00272052	RNA, U5B small nuclear 3, pseudogene [Source:HGNC Symbol;Acc:HGNC:34183]
ENSG00000136463	TACO1	0.00272187	translational activator of mitochondrially encoded cytochrome c oxidase I [Source:HGNC Symbol;Acc:HGNC:24316]
ENSG00000116688	MFN2	0.00272909	mitofusin 2 [Source:HGNC Symbol;Acc:HGNC:16877]
ENSG00000063244	U2AF2	0.00274001	U2 small nuclear RNA auxiliary factor 2 [Source:HGNC Symbol;Acc:HGNC:23156]
ENSG00000130449	ZSWIM6	0.0027464	zinc finger, SWIM-type containing 6 [Source:HGNC Symbol;Acc:HGNC:29316]
ENSG00000019144	PHLDB1	0.0027653	pleckstrin homology-like domain, family B, member 1 [Source:HGNC Symbol;Acc:HGNC:23697]
ENSG00000174640	SLCO2A1	0.00277391	solute carrier organic anion transporter family, member 2A1 [Source:HGNC Symbol;Acc:HGNC:10955]
ENSG00000175309	PHYKPL	0.00277586	5-phosphohydroxy-L-lysine phospho-lyase [Source:HGNC Symbol;Acc:HGNC:28249]
ENSG00000164405	UQCRQ	0.00281253	ubiquinol-cytochrome c reductase, complex III subunit VII, 9.5kDa [Source:HGNC Symbol;Acc:HGNC:29594]
ENSG00000170775	GPR37	0.00281992	G protein-coupled receptor 37 (endothelin receptor type B-like) [Source:HGNC Symbol;Acc:HGNC:4494]
ENSG00000099869	IGF2-AS	0.00282786	IGF2 antisense RNA [Source:HGNC Symbol;Acc:HGNC:14062]
ENSG00000143322	ABL2	0.00284329	ABL proto-oncogene 2, non-receptor tyrosine kinase [Source:HGNC Symbol;Acc:HGNC:77]
ENSG00000156219	ART3	0.00290643	ADP-ribosyltransferase 3 [Source:HGNC Symbol;Acc:HGNC:725]
ENSG00000252686	RNU6-1234P	0.00292126	RNA, U6 small nuclear 1234, pseudogene [Source:HGNC Symbol;Acc:HGNC:48197]
ENSG00000206102	KRTAP19-8	0.00292369	keratin associated protein 19-8 [Source:HGNC Symbol;Acc:HGNC:33898]
ENSG00000117411	B4GALT2	0.0029447	UDP-Gal:betaGlcNAc beta 1,4- galactosyltransferase, polypeptide 2 [Source:HGNC Symbol;Acc:HGNC:925]
ENSG00000159479	MED8	0.00295791	mediator complex subunit 8 [Source:HGNC Symbol;Acc:HGNC:19971]
ENSG00000185010	F8	0.00297255	coagulation factor VIII, procoagulant component [Source:HGNC Symbol;Acc:HGNC:3546]
ENSG00000112640	PPP2R5D	0.00297597	protein phosphatase 2, regulatory subunit B', delta [Source:HGNC Symbol;Acc:HGNC:9312]
ENSG00000110375	UPK2	0.00300333	uroplakin 2 [Source:HGNC Symbol;Acc:HGNC:12579]
ENSG00000163374	YY1AP1	0.00300829	YY1 associated protein 1 [Source:HGNC Symbol;Acc:HGNC:30935]
ENSG00000263841	RN7SL44P	0.00300987	RNA, 7SL, cytoplasmic 44, pseudogene [Source:HGNC Symbol;Acc:HGNC:46060]
ENSG00000146463	ZMYM4	0.00302977	zinc finger, MYM-type 4 [Source:HGNC Symbol;Acc:HGNC:13055]
ENSG00000108953	YWHAE	0.00303085	tyrosine 3-monooxygenase/tryptophan 5-monooxygenase activation protein, epsilon [Source:HGNC Symbol;Acc:HGNC:12851]
ENSG00000167861	HID1	0.00305545	HID1 domain containing [Source:HGNC Symbol;Acc:HGNC:15736]
ENSG00000202468	RNU4-17P	0.00306415	RNA, U4 small nuclear 17, pseudogene [Source:HGNC Symbol;Acc:HGNC:46953]
ENSG00000196576	PLXNB2	0.00307798	plexin B2 [Source:HGNC Symbol;Acc:HGNC:9104]
ENSG00000119185	ITGB1BP1	0.00308378	integrin beta 1 binding protein 1 [Source:HGNC Symbol;Acc:HGNC:23927]
ENSG00000158748	HTR6	0.00309488	5-hydroxytryptamine (serotonin) receptor 6, G protein-coupled [Source:HGNC Symbol;Acc:HGNC:5301]
ENSG00000196876	SCN8A	0.00310643	sodium channel, voltage gated, type VIII, alpha subunit [Source:HGNC Symbol;Acc:HGNC:10596]
ENSG00000174238	PITPNA	0.00311393	phosphatidylinositol transfer protein, alpha [Source:HGNC Symbol;Acc:HGNC:9001]
ENSG00000222635	RNU6-1203P	0.00313543	RNA, U6 small nuclear 1203, pseudogene [Source:HGNC Symbol;Acc:HGNC:48166]
ENSG00000124226	RNF114	0.00315716	ring finger protein 114 [Source:HGNC Symbol;Acc:HGNC:13094]
ENSG00000187372	PCDHB13	0.00316345	protocadherin beta 13 [Source:HGNC Symbol;Acc:HGNC:8684]
ENSG00000131126	TEX101	0.00319053	testis expressed 101 [Source:HGNC Symbol;Acc:HGNC:30722]
ENSG00000077782	FGFR1	0.00320492	fibroblast growth factor receptor 1 [Source:HGNC Symbol;Acc:HGNC:3688]
ENSG00000166477	LEO1	0.00321647	Leo1, Paf1/RNA polymerase II complex component, homolog (S. cerevisiae) [Source:HGNC Symbol;Acc:HGNC:30401]
ENSG00000175197	DDIT3	0.00323167	DNA-damage-inducible transcript 3 [Source:HGNC Symbol;Acc:HGNC:2726]
ENSG00000177370	TIMM22	0.00324307	translocase of inner mitochondrial membrane 22 homolog (yeast) [Source:HGNC Symbol;Acc:HGNC:17317]
ENSG00000143409	FAM63A	0.00326173	family with sequence similarity 63, member A [Source:HGNC Symbol;Acc:HGNC:25648]
ENSG00000187889	C1orf168	0.00326319	chromosome 1 open reading frame 168 [Source:HGNC Symbol;Acc:HGNC:27295]
ENSG00000073670	ADAM11	0.00328333	ADAM metallopeptidase domain 11 [Source:HGNC Symbol;Acc:HGNC:189]
ENSG00000176165	FOXG1	0.00329574	forkhead box G1 [Source:HGNC Symbol;Acc:HGNC:3811]
ENSG00000198917	C9orf114	0.00331439	chromosome 9 open reading frame 114 [Source:HGNC Symbol;Acc:HGNC:26933]
ENSG00000164176	EDIL3	0.00334693	EGF-like repeats and discoidin I-like domains 3 [Source:HGNC Symbol;Acc:HGNC:3173]
ENSG00000033170	FUT8	0.00335159	fucosyltransferase 8 (alpha (1,6) fucosyltransferase) [Source:HGNC Symbol;Acc:HGNC:4019]
ENSG00000166351	POTED	0.00336273	POTE ankyrin domain family, member D [Source:HGNC Symbol;Acc:HGNC:23822]
ENSG00000110237	ARHGEF17	0.00337047	Rho guanine nucleotide exchange factor (GEF) 17 [Source:HGNC Symbol;Acc:HGNC:21726]
ENSG00000176974	SHMT1	0.00345276	serine hydroxymethyltransferase 1 (soluble) [Source:HGNC Symbol;Acc:HGNC:10850]
ENSG00000100373	UPK3A	0.00345456	uroplakin 3A [Source:HGNC Symbol;Acc:HGNC:12580]
ENSG00000163946	FAM208A	0.00345471	family with sequence similarity 208, member A [Source:HGNC Symbol;Acc:HGNC:30314]
ENSG00000095906	NUBP2	0.00346426	nucleotide binding protein 2 [Source:HGNC Symbol;Acc:HGNC:8042]
ENSG00000180488	FAM73A	0.00349182	family with sequence similarity 73, member A [Source:HGNC Symbol;Acc:HGNC:24741]
ENSG00000240869	RN7SL128P	0.00349472	RNA, 7SL, cytoplasmic 128, pseudogene [Source:HGNC Symbol;Acc:HGNC:46144]
ENSG00000066855	MTFR1	0.00351641	mitochondrial fission regulator 1 [Source:HGNC Symbol;Acc:HGNC:29510]
ENSG00000180233	ZNRF2	0.00352181	zinc and ring finger 2 [Source:HGNC Symbol;Acc:HGNC:22316]
ENSG00000006047	YBX2	0.0035323	Y box binding protein 2 [Source:HGNC Symbol;Acc:HGNC:17948]
ENSG00000036054	TBC1D23	0.00353749	TBC1 domain family, member 23 [Source:HGNC Symbol;Acc:HGNC:25622]
ENSG00000108947	EFNB3	0.00353842	ephrin-B3 [Source:HGNC Symbol;Acc:HGNC:3228]
ENSG00000036672	USP2	0.00359601	ubiquitin specific peptidase 2 [Source:HGNC Symbol;Acc:HGNC:12618]
ENSG00000252807	RNU6-1006P	0.00361572	RNA, U6 small nuclear 1006, pseudogene [Source:HGNC Symbol;Acc:HGNC:47969]
ENSG00000196109	ZNF676	0.00363309	zinc finger protein 676 [Source:HGNC Symbol;Acc:HGNC:20429]
ENSG00000183317	EPHA10	0.00363357	EPH receptor A10 [Source:HGNC Symbol;Acc:HGNC:19987]
ENSG00000139194	RBP5	0.00363553	retinol binding protein 5, cellular [Source:HGNC Symbol;Acc:HGNC:15847]
ENSG00000182707	FXYD6P3	0.00364489	FXYD domain containing ion transport regulator 6 pseudogene 3 [Source:HGNC Symbol;Acc:HGNC:31124]
ENSG00000239175	RNU6-1218P	0.0036554	RNA, U6 small nuclear 1218, pseudogene [Source:HGNC Symbol;Acc:HGNC:48181]
ENSG00000078369	GNB1	0.00366893	guanine nucleotide binding protein (G protein), beta polypeptide 1 [Source:HGNC Symbol;Acc:HGNC:4396]
ENSG00000119812	FAM98A	0.00367215	family with sequence similarity 98, member A [Source:HGNC Symbol;Acc:HGNC:24520]
ENSG00000144231	POLR2D	0.0036847	polymerase (RNA) II (DNA directed) polypeptide D [Source:HGNC Symbol;Acc:HGNC:9191]
ENSG00000151116	UEVLD	0.00368849	UEV and lactate/malate dehyrogenase domains [Source:HGNC Symbol;Acc:HGNC:30866]
ENSG00000130711	PRDM12	0.00369032	PR domain containing 12 [Source:HGNC Symbol;Acc:HGNC:13997]
ENSG00000013583	HEBP1	0.00369349	heme binding protein 1 [Source:HGNC Symbol;Acc:HGNC:17176]
ENSG00000167720	SRR	0.00372196	serine racemase [Source:HGNC Symbol;Acc:HGNC:14398]
ENSG00000101457	DNTTIP1	0.00372216	deoxynucleotidyltransferase, terminal, interacting protein 1 [Source:HGNC Symbol;Acc:HGNC:16160]
ENSG00000185155	MIXL1	0.00372367	Mix paired-like homeobox [Source:HGNC Symbol;Acc:HGNC:13363]
ENSG00000196296	ATP2A1	0.00374425	ATPase, Ca++ transporting, cardiac muscle, fast twitch 1 [Source:HGNC Symbol;Acc:HGNC:811]
ENSG00000180189	HMGB1P14	0.00375794	high mobility group box 1 pseudogene 14 [Source:HGNC Symbol;Acc:HGNC:20014]
ENSG00000170852	KBTBD2	0.00378274	kelch repeat and BTB (POZ) domain containing 2 [Source:HGNC Symbol;Acc:HGNC:21751]
ENSG00000123124	WWP1	0.00379989	WW domain containing E3 ubiquitin protein ligase 1 [Source:HGNC Symbol;Acc:HGNC:17004]
ENSG00000186665	C17orf58	0.00380504	chromosome 17 open reading frame 58 [Source:HGNC Symbol;Acc:HGNC:27568]
ENSG00000197467	COL13A1	0.00380906	collagen, type XIII, alpha 1 [Source:HGNC Symbol;Acc:HGNC:2190]
ENSG00000126603	GLIS2	0.00383696	GLIS family zinc finger 2 [Source:HGNC Symbol;Acc:HGNC:29450]
ENSG00000173068	BNC2	0.00384227	basonuclin 2 [Source:HGNC Symbol;Acc:HGNC:30988]
ENSG00000153029	MR1	0.00385517	major histocompatibility complex, class I-related [Source:HGNC Symbol;Acc:HGNC:4975]
ENSG00000178234	GALNT11	0.00387009	polypeptide N-acetylgalactosaminyltransferase 11 [Source:HGNC Symbol;Acc:HGNC:19875]
ENSG00000127533	F2RL3	0.00387036	coagulation factor II (thrombin) receptor-like 3 [Source:HGNC Symbol;Acc:HGNC:3540]
ENSG00000124562	SNRPC	0.00387121	small nuclear ribonucleoprotein polypeptide C [Source:HGNC Symbol;Acc:HGNC:11157]
ENSG00000080618	CPB2	0.0038737	carboxypeptidase B2 (plasma) [Source:HGNC Symbol;Acc:HGNC:2300]
ENSG00000124006	OBSL1	0.00387912	obscurin-like 1 [Source:HGNC Symbol;Acc:HGNC:29092]
ENSG00000226887	ERVMER34-1	0.0039117	endogenous retrovirus group MER34, member 1 [Source:HGNC Symbol;Acc:HGNC:42970]
ENSG00000115241	PPM1G	0.0039135	protein phosphatase, Mg2+/Mn2+ dependent, 1G [Source:HGNC Symbol;Acc:HGNC:9278]
ENSG00000147853	AK3	0.00391442	adenylate kinase 3 [Source:HGNC Symbol;Acc:HGNC:17376]
ENSG00000128602	SMO	0.0039184	smoothened, frizzled class receptor [Source:HGNC Symbol;Acc:HGNC:11119]
ENSG00000163155	LYSMD1	0.00392682	LysM, putative peptidoglycan-binding, domain containing 1 [Source:HGNC Symbol;Acc:HGNC:32070]
ENSG00000256463	SALL3	0.00395641	spalt-like transcription factor 3 [Source:HGNC Symbol;Acc:HGNC:10527]
ENSG00000154274	C4orf19	0.00397159	chromosome 4 open reading frame 19 [Source:HGNC Symbol;Acc:HGNC:25618]
ENSG00000187772	LIN28B	0.003977	lin-28 homolog B (C. elegans) [Source:HGNC Symbol;Acc:HGNC:32207]
ENSG00000242485	MRPL20	0.00397882	mitochondrial ribosomal protein L20 [Source:HGNC Symbol;Acc:HGNC:14478]
ENSG00000170915	PAQR8	0.00398363	progestin and adipoQ receptor family member VIII [Source:HGNC Symbol;Acc:HGNC:15708]
ENSG00000096696	DSP	0.00399036	desmoplakin [Source:HGNC Symbol;Acc:HGNC:3052]
ENSG00000256073	C21orf119	0.00399776	chromosome 21 open reading frame 119 [Source:HGNC Symbol;Acc:HGNC:23128]
ENSG00000232851	ATP5J2P3	0.00400302	ATP synthase, H+ transporting, mitochondrial Fo complex, subunit F2 pseudogene 3 [Source:HGNC Symbol;Acc:HGNC:21286]
ENSG00000196705	ZNF431	0.00400813	zinc finger protein 431 [Source:HGNC Symbol;Acc:HGNC:20809]
ENSG00000160867	FGFR4	0.00401469	fibroblast growth factor receptor 4 [Source:HGNC Symbol;Acc:HGNC:3691]
ENSG00000103160	HSDL1	0.00402124	hydroxysteroid dehydrogenase like 1 [Source:HGNC Symbol;Acc:HGNC:16475]
ENSG00000132196	HSD17B7	0.00402151	hydroxysteroid (17-beta) dehydrogenase 7 [Source:HGNC Symbol;Acc:HGNC:5215]
ENSG00000106066	CPVL	0.00405322	carboxypeptidase, vitellogenic-like [Source:HGNC Symbol;Acc:HGNC:14399]
ENSG00000124610	HIST1H1A	0.00405684	histone cluster 1, H1a [Source:HGNC Symbol;Acc:HGNC:4715]
ENSG00000185340	GAS2L1	0.00409888	growth arrest-specific 2 like 1 [Source:HGNC Symbol;Acc:HGNC:16955]
ENSG00000168298	HIST1H1E	0.004101	histone cluster 1, H1e [Source:HGNC Symbol;Acc:HGNC:4718]
ENSG00000141428	C18orf21	0.00412467	chromosome 18 open reading frame 21 [Source:HGNC Symbol;Acc:HGNC:28802]
ENSG00000051523	CYBA	0.00413753	cytochrome b-245, alpha polypeptide [Source:HGNC Symbol;Acc:HGNC:2577]
ENSG00000142192	APP	0.00415538	amyloid beta (A4) precursor protein [Source:HGNC Symbol;Acc:HGNC:620]
ENSG00000104218	CSPP1	0.00417684	centrosome and spindle pole associated protein 1 [Source:HGNC Symbol;Acc:HGNC:26193]
ENSG00000101844	ATG4A	0.00419588	autophagy related 4A, cysteine peptidase [Source:HGNC Symbol;Acc:HGNC:16489]
ENSG00000112039	FANCE	0.00420099	Fanconi anemia, complementation group E [Source:HGNC Symbol;Acc:HGNC:3586]
ENSG00000176563	CNTD1	0.00420342	cyclin N-terminal domain containing 1 [Source:HGNC Symbol;Acc:HGNC:26847]
ENSG00000171931	FBXW10	0.00421074	F-box and WD repeat domain containing 10 [Source:HGNC Symbol;Acc:HGNC:1211]
ENSG00000066322	ELOVL1	0.00422387	ELOVL fatty acid elongase 1 [Source:HGNC Symbol;Acc:HGNC:14418]
ENSG00000207695	MIR184	0.00426322	microRNA 184 [Source:HGNC Symbol;Acc:HGNC:31555]
ENSG00000142149	HUNK	0.00426707	hormonally up-regulated Neu-associated kinase [Source:HGNC Symbol;Acc:HGNC:13326]
ENSG00000166856	GPR182	0.00427245	G protein-coupled receptor 182 [Source:HGNC Symbol;Acc:HGNC:13708]
ENSG00000166233	ARIH1	0.00428819	ariadne RBR E3 ubiquitin protein ligase 1 [Source:HGNC Symbol;Acc:HGNC:689]
ENSG00000252533	RNU6-572P	0.00431566	RNA, U6 small nuclear 572, pseudogene [Source:HGNC Symbol;Acc:HGNC:47535]
ENSG00000104823	ECH1	0.00431612	enoyl CoA hydratase 1, peroxisomal [Source:HGNC Symbol;Acc:HGNC:3149]
ENSG00000212289	RNA5SP339	0.00431873	RNA, 5S ribosomal pseudogene 339 [Source:HGNC Symbol;Acc:HGNC:43239]
ENSG00000207182	RNU1-44P	0.00432705	RNA, U1 small nuclear 44, pseudogene [Source:HGNC Symbol;Acc:HGNC:48386]
ENSG00000003056	M6PR	0.00434705	mannose-6-phosphate receptor (cation dependent) [Source:HGNC Symbol;Acc:HGNC:6752]
ENSG00000077147	TM9SF3	0.00436552	transmembrane 9 superfamily member 3 [Source:HGNC Symbol;Acc:HGNC:21529]
ENSG00000154102	C16orf74	0.00437616	chromosome 16 open reading frame 74 [Source:HGNC Symbol;Acc:HGNC:23362]
ENSG00000103319	EEF2K	0.00438604	eukaryotic elongation factor-2 kinase [Source:HGNC Symbol;Acc:HGNC:24615]
ENSG00000135018	UBQLN1	0.00439515	ubiquilin 1 [Source:HGNC Symbol;Acc:HGNC:12508]
ENSG00000142156	COL6A1	0.00440113	collagen, type VI, alpha 1 [Source:HGNC Symbol;Acc:HGNC:2211]
ENSG00000054690	PLEKHH1	0.00442045	pleckstrin homology domain containing, family H (with MyTH4 domain) member 1 [Source:HGNC Symbol;Acc:HGNC:17733]
ENSG00000118156	ZNF541	0.00442383	zinc finger protein 541 [Source:HGNC Symbol;Acc:HGNC:25294]
ENSG00000223452	HMGN2P18	0.00444467	high mobility group nucleosomal binding domain 2 pseudogene 18 [Source:HGNC Symbol;Acc:HGNC:39382]
ENSG00000185813	PCYT2	0.00446028	phosphate cytidylyltransferase 2, ethanolamine [Source:HGNC Symbol;Acc:HGNC:8756]
ENSG00000172466	ZNF24	0.00448149	zinc finger protein 24 [Source:HGNC Symbol;Acc:HGNC:13032]
ENSG00000087191	PSMC5	0.00449367	proteasome (prosome, macropain) 26S subunit, ATPase, 5 [Source:HGNC Symbol;Acc:HGNC:9552]
ENSG00000172803	SNX32	0.00454888	sorting nexin 32 [Source:HGNC Symbol;Acc:HGNC:26423]
ENSG00000154162	CDH12	0.00455308	cadherin 12, type 2 (N-cadherin 2) [Source:HGNC Symbol;Acc:HGNC:1751]
ENSG00000240327	RN7SL93P	0.00455536	RNA, 7SL, cytoplasmic 93, pseudogene [Source:HGNC Symbol;Acc:HGNC:46109]
ENSG00000148606	POLR3A	0.00456389	polymerase (RNA) III (DNA directed) polypeptide A, 155kDa [Source:HGNC Symbol;Acc:HGNC:30074]
ENSG00000143797	MBOAT2	0.00457483	membrane bound O-acyltransferase domain containing 2 [Source:HGNC Symbol;Acc:HGNC:25193]
ENSG00000120279	MYCT1	0.00462322	myc target 1 [Source:HGNC Symbol;Acc:HGNC:23172]
ENSG00000147081	AKAP4	0.00462567	A kinase (PRKA) anchor protein 4 [Source:HGNC Symbol;Acc:HGNC:374]
ENSG00000135931	ARMC9	0.00465922	armadillo repeat containing 9 [Source:HGNC Symbol;Acc:HGNC:20730]
ENSG00000196345	ZKSCAN7	0.00466791	zinc finger with KRAB and SCAN domains 7 [Source:HGNC Symbol;Acc:HGNC:12955]
ENSG00000124657	OR2B6	0.00468088	olfactory receptor, family 2, subfamily B, member 6 [Source:HGNC Symbol;Acc:HGNC:8241]
ENSG00000184481	FOXO4	0.00468123	forkhead box O4 [Source:HGNC Symbol;Acc:HGNC:7139]
ENSG00000103056	SMPD3	0.00469255	sphingomyelin phosphodiesterase 3, neutral membrane (neutral sphingomyelinase II) [Source:HGNC Symbol;Acc:HGNC:14240]
ENSG00000103460	TOX3	0.00469465	TOX high mobility group box family member 3 [Source:HGNC Symbol;Acc:HGNC:11972]
ENSG00000269586	NA	0.0047037	Cancer/testis antigen family 45 member A5 [Source:UniProtKB/Swiss-Prot;Acc:Q6NSH3]
ENSG00000198162	MAN1A2	0.00471432	mannosidase, alpha, class 1A, member 2 [Source:HGNC Symbol;Acc:HGNC:6822]
ENSG00000185339	TCN2	0.00471857	transcobalamin II [Source:HGNC Symbol;Acc:HGNC:11653]
ENSG00000158773	USF1	0.00474468	upstream transcription factor 1 [Source:HGNC Symbol;Acc:HGNC:12593]
ENSG00000174343	CHRNA9	0.00476569	cholinergic receptor, nicotinic, alpha 9 (neuronal) [Source:HGNC Symbol;Acc:HGNC:14079]
ENSG00000202434	NA	0.00480463	Small nucleolar RNA SNORA4 [Source:RFAM;Acc:RF00394]
ENSG00000117133	RPF1	0.00481991	ribosome production factor 1 homolog (S. cerevisiae) [Source:HGNC Symbol;Acc:HGNC:30350]
ENSG00000152402	GUCY1A2	0.00483952	guanylate cyclase 1, soluble, alpha 2 [Source:HGNC Symbol;Acc:HGNC:4684]
ENSG00000172795	DCP2	0.00485304	decapping mRNA 2 [Source:HGNC Symbol;Acc:HGNC:24452]
ENSG00000106536	POU6F2	0.00486506	POU class 6 homeobox 2 [Source:HGNC Symbol;Acc:HGNC:21694]
ENSG00000129214	SHBG	0.00488398	sex hormone-binding globulin [Source:HGNC Symbol;Acc:HGNC:10839]
ENSG00000138709	LARP1B	0.00488677	La ribonucleoprotein domain family, member 1B [Source:HGNC Symbol;Acc:HGNC:24704]
ENSG00000167186	COQ7	0.00491191	coenzyme Q7 homolog, ubiquinone (yeast) [Source:HGNC Symbol;Acc:HGNC:2244]
ENSG00000221972	C3orf36	0.00492362	chromosome 3 open reading frame 36 [Source:HGNC Symbol;Acc:HGNC:26170]
ENSG00000244005	NFS1	0.00493636	NFS1 cysteine desulfurase [Source:HGNC Symbol;Acc:HGNC:15910]
ENSG00000106333	PCOLCE	0.00494196	procollagen C-endopeptidase enhancer [Source:HGNC Symbol;Acc:HGNC:8738]
ENSG00000140798	ABCC12	0.00495659	ATP-binding cassette, sub-family C (CFTR/MRP), member 12 [Source:HGNC Symbol;Acc:HGNC:14640]
ENSG00000220785	MTMR9LP	0.00496284	myotubularin related protein 9-like, pseudogene [Source:HGNC Symbol;Acc:HGNC:27920]
ENSG00000104267	CA2	0.00496288	carbonic anhydrase II [Source:HGNC Symbol;Acc:HGNC:1373]
ENSG00000201608	RNU4-42P	0.00498924	RNA, U4 small nuclear 42, pseudogene [Source:HGNC Symbol;Acc:HGNC:46978]
ENSG00000141480	ARRB2	0.0050165	arrestin, beta 2 [Source:HGNC Symbol;Acc:HGNC:712]
ENSG00000252199	NA	0.00505495	Small nucleolar RNA SNORA70 [Source:RFAM;Acc:RF00156]
ENSG00000103494	RPGRIP1L	0.00505781	RPGRIP1-like [Source:HGNC Symbol;Acc:HGNC:29168]
ENSG00000090857	PDPR	0.0050906	pyruvate dehydrogenase phosphatase regulatory subunit [Source:HGNC Symbol;Acc:HGNC:30264]
ENSG00000175221	MED16	0.00509919	mediator complex subunit 16 [Source:HGNC Symbol;Acc:HGNC:17556]
ENSG00000065154	OAT	0.00510085	ornithine aminotransferase [Source:HGNC Symbol;Acc:HGNC:8091]
ENSG00000010256	UQCRC1	0.00512701	ubiquinol-cytochrome c reductase core protein I [Source:HGNC Symbol;Acc:HGNC:12585]
ENSG00000126070	AGO3	0.00515841	argonaute RISC catalytic component 3 [Source:HGNC Symbol;Acc:HGNC:18421]
ENSG00000196620	UGT2B15	0.00518925	UDP glucuronosyltransferase 2 family, polypeptide B15 [Source:HGNC Symbol;Acc:HGNC:12546]
ENSG00000128482	RNF112	0.00519996	ring finger protein 112 [Source:HGNC Symbol;Acc:HGNC:12968]
ENSG00000222154	RN7SKP218	0.00520131	RNA, 7SK small nuclear pseudogene 218 [Source:HGNC Symbol;Acc:HGNC:45942]
ENSG00000172590	MRPL52	0.00522281	mitochondrial ribosomal protein L52 [Source:HGNC Symbol;Acc:HGNC:16655]
ENSG00000185359	HGS	0.00525352	hepatocyte growth factor-regulated tyrosine kinase substrate [Source:HGNC Symbol;Acc:HGNC:4897]
ENSG00000185664	PMEL	0.0052592	premelanosome protein [Source:HGNC Symbol;Acc:HGNC:10880]
ENSG00000005100	DHX33	0.00528122	DEAH (Asp-Glu-Ala-His) box polypeptide 33 [Source:HGNC Symbol;Acc:HGNC:16718]
ENSG00000153179	RASSF3	0.00533273	Ras association (RalGDS/AF-6) domain family member 3 [Source:HGNC Symbol;Acc:HGNC:14271]
ENSG00000002746	HECW1	0.00534075	HECT, C2 and WW domain containing E3 ubiquitin protein ligase 1 [Source:HGNC Symbol;Acc:HGNC:22195]
ENSG00000196878	LAMB3	0.00539431	laminin, beta 3 [Source:HGNC Symbol;Acc:HGNC:6490]
ENSG00000242599	CSAG4	0.00539992	CSAG family, member 4 (pseudogene) [Source:HGNC Symbol;Acc:HGNC:20923]
ENSG00000120318	ARAP3	0.00540086	ArfGAP with RhoGAP domain, ankyrin repeat and PH domain 3 [Source:HGNC Symbol;Acc:HGNC:24097]
ENSG00000267680	ZNF224	0.00540219	zinc finger protein 224 [Source:HGNC Symbol;Acc:HGNC:13017]
ENSG00000154639	CXADR	0.00542843	coxsackie virus and adenovirus receptor [Source:HGNC Symbol;Acc:HGNC:2559]
ENSG00000202332	NA	0.00543725	Y RNA [Source:RFAM;Acc:RF00019]
ENSG00000142794	NBPF3	0.00543749	neuroblastoma breakpoint family, member 3 [Source:HGNC Symbol;Acc:HGNC:25076]
ENSG00000010539	ZNF200	0.00544693	zinc finger protein 200 [Source:HGNC Symbol;Acc:HGNC:12993]
ENSG00000136155	SCEL	0.00546078	sciellin [Source:HGNC Symbol;Acc:HGNC:10573]
ENSG00000249582	RPL7L1P4	0.00546567	ribosomal protein L7-like 1 pseudogene 4 [Source:HGNC Symbol;Acc:HGNC:39486]
ENSG00000196284	SUPT3H	0.00548302	suppressor of Ty 3 homolog (S. cerevisiae) [Source:HGNC Symbol;Acc:HGNC:11466]
ENSG00000170367	CST5	0.00550398	cystatin D [Source:HGNC Symbol;Acc:HGNC:2477]
ENSG00000221886	ZBED8	0.00552777	zinc finger, BED-type containing 8 [Source:HGNC Symbol;Acc:HGNC:30804]
ENSG00000184357	HIST1H1B	0.00554449	histone cluster 1, H1b [Source:HGNC Symbol;Acc:HGNC:4719]
ENSG00000125255	SLC10A2	0.00556216	solute carrier family 10 (sodium/bile acid cotransporter), member 2 [Source:HGNC Symbol;Acc:HGNC:10906]
ENSG00000212459	RNU6-695P	0.00556609	RNA, U6 small nuclear 695, pseudogene [Source:HGNC Symbol;Acc:HGNC:47658]
ENSG00000007944	MYLIP	0.00557693	myosin regulatory light chain interacting protein [Source:HGNC Symbol;Acc:HGNC:21155]
ENSG00000105255	FSD1	0.00559487	fibronectin type III and SPRY domain containing 1 [Source:HGNC Symbol;Acc:HGNC:13745]
ENSG00000204406	MBD5	0.0056022	methyl-CpG binding domain protein 5 [Source:HGNC Symbol;Acc:HGNC:20444]
ENSG00000204842	ATXN2	0.00560538	ataxin 2 [Source:HGNC Symbol;Acc:HGNC:10555]
ENSG00000070985	TRPM5	0.00561412	transient receptor potential cation channel, subfamily M, member 5 [Source:HGNC Symbol;Acc:HGNC:14323]
ENSG00000100060	MFNG	0.00562592	MFNG O-fucosylpeptide 3-beta-N-acetylglucosaminyltransferase [Source:HGNC Symbol;Acc:HGNC:7038]
ENSG00000212425	RNA5SP105	0.00562987	RNA, 5S ribosomal pseudogene 105 [Source:HGNC Symbol;Acc:HGNC:42903]
ENSG00000110619	CARS	0.00563599	cysteinyl-tRNA synthetase [Source:HGNC Symbol;Acc:HGNC:1493]
ENSG00000197013	ZNF429	0.00563884	zinc finger protein 429 [Source:HGNC Symbol;Acc:HGNC:20817]
ENSG00000170291	ELP5	0.0056452	elongator acetyltransferase complex subunit 5 [Source:HGNC Symbol;Acc:HGNC:30617]
ENSG00000141013	GAS8	0.00564664	growth arrest-specific 8 [Source:HGNC Symbol;Acc:HGNC:4166]
ENSG00000171757	LRRC34	0.00565655	leucine rich repeat containing 34 [Source:HGNC Symbol;Acc:HGNC:28408]
ENSG00000170629	DPY19L2P2	0.0056879	DPY19L2 pseudogene 2 [Source:HGNC Symbol;Acc:HGNC:21764]
ENSG00000110917	MLEC	0.00569649	malectin [Source:HGNC Symbol;Acc:HGNC:28973]
ENSG00000161267	BDH1	0.00570335	3-hydroxybutyrate dehydrogenase, type 1 [Source:HGNC Symbol;Acc:HGNC:1027]
ENSG00000239888	RN7SL792P	0.00571776	RNA, 7SL, cytoplasmic 792, pseudogene [Source:HGNC Symbol;Acc:HGNC:46808]
ENSG00000137713	PPP2R1B	0.00572766	protein phosphatase 2, regulatory subunit A, beta [Source:HGNC Symbol;Acc:HGNC:9303]
ENSG00000101940	WDR13	0.00574212	WD repeat domain 13 [Source:HGNC Symbol;Acc:HGNC:14352]
ENSG00000165164	CXorf22	0.00577747	chromosome X open reading frame 22 [Source:HGNC Symbol;Acc:HGNC:28546]
ENSG00000166405	RIC3	0.00578084	RIC3 acetylcholine receptor chaperone [Source:HGNC Symbol;Acc:HGNC:30338]
ENSG00000124659	TBCC	0.00579906	tubulin folding cofactor C [Source:HGNC Symbol;Acc:HGNC:11580]
ENSG00000113327	GABRG2	0.0058128	gamma-aminobutyric acid (GABA) A receptor, gamma 2 [Source:HGNC Symbol;Acc:HGNC:4087]
ENSG00000201674	NA	0.00584859	Small nucleolar RNA U3 [Source:RFAM;Acc:RF00012]
ENSG00000104093	DMXL2	0.00585264	Dmx-like 2 [Source:HGNC Symbol;Acc:HGNC:2938]
ENSG00000179172	HNRNPCL1	0.00586427	heterogeneous nuclear ribonucleoprotein C-like 1 [Source:HGNC Symbol;Acc:HGNC:29295]
ENSG00000162076	FLYWCH2	0.00587557	FLYWCH family member 2 [Source:HGNC Symbol;Acc:HGNC:25178]
ENSG00000100181	TPTEP1	0.00594318	transmembrane phosphatase with tensin homology pseudogene 1 [Source:HGNC Symbol;Acc:HGNC:43648]
ENSG00000151748	SAV1	0.00594736	salvador family WW domain containing protein 1 [Source:HGNC Symbol;Acc:HGNC:17795]
ENSG00000163428	LRRC58	0.00594973	leucine rich repeat containing 58 [Source:HGNC Symbol;Acc:HGNC:26968]
ENSG00000277556	OR13C5	0.00597862	olfactory receptor, family 13, subfamily C, member 5 [Source:HGNC Symbol;Acc:HGNC:15100]
ENSG00000145087	STXBP5L	0.0059852	syntaxin binding protein 5-like [Source:HGNC Symbol;Acc:HGNC:30757]
ENSG00000127324	TSPAN8	0.00604386	tetraspanin 8 [Source:HGNC Symbol;Acc:HGNC:11855]
ENSG00000060642	PIGV	0.00604855	phosphatidylinositol glycan anchor biosynthesis, class V [Source:HGNC Symbol;Acc:HGNC:26031]
ENSG00000252727	NA	0.006055	Small Cajal body specific RNA 11 [Source:RFAM;Acc:RF00564]
ENSG00000158850	B4GALT3	0.00606698	UDP-Gal:betaGlcNAc beta 1,4- galactosyltransferase, polypeptide 3 [Source:HGNC Symbol;Acc:HGNC:926]
ENSG00000175274	TP53I11	0.00607075	tumor protein p53 inducible protein 11 [Source:HGNC Symbol;Acc:HGNC:16842]
ENSG00000056998	GYG2	0.00607204	glycogenin 2 [Source:HGNC Symbol;Acc:HGNC:4700]
ENSG00000105617	LENG1	0.00608403	leukocyte receptor cluster (LRC) member 1 [Source:HGNC Symbol;Acc:HGNC:15502]
ENSG00000184809	C21orf88	0.00609571	chromosome 21 open reading frame 88 [Source:HGNC Symbol;Acc:HGNC:16424]
ENSG00000102103	PQBP1	0.00609683	polyglutamine binding protein 1 [Source:HGNC Symbol;Acc:HGNC:9330]
ENSG00000186967	KRTAP19-4	0.00609833	keratin associated protein 19-4 [Source:HGNC Symbol;Acc:HGNC:18939]
ENSG00000174748	RPL15	0.00609852	ribosomal protein L15 [Source:HGNC Symbol;Acc:HGNC:10306]
ENSG00000214575	CPEB1	0.00612226	cytoplasmic polyadenylation element binding protein 1 [Source:HGNC Symbol;Acc:HGNC:21744]
ENSG00000101189	MRGBP	0.00613199	MRG/MORF4L binding protein [Source:HGNC Symbol;Acc:HGNC:15866]
ENSG00000171700	RGS19	0.00613237	regulator of G-protein signaling 19 [Source:HGNC Symbol;Acc:HGNC:13735]
ENSG00000125447	GGA3	0.00613762	golgi-associated, gamma adaptin ear containing, ARF binding protein 3 [Source:HGNC Symbol;Acc:HGNC:17079]
ENSG00000108932	SLC16A6	0.00620209	solute carrier family 16, member 6 [Source:HGNC Symbol;Acc:HGNC:10927]
ENSG00000100813	ACIN1	0.00621802	apoptotic chromatin condensation inducer 1 [Source:HGNC Symbol;Acc:HGNC:17066]
ENSG00000226935	LINC00161	0.00622257	long intergenic non-protein coding RNA 161 [Source:HGNC Symbol;Acc:HGNC:17138]
ENSG00000163251	FZD5	0.00623202	frizzled class receptor 5 [Source:HGNC Symbol;Acc:HGNC:4043]
ENSG00000201496	RN7SKP275	0.00625376	RNA, 7SK small nuclear pseudogene 275 [Source:HGNC Symbol;Acc:HGNC:45999]
ENSG00000206660	NA	0.00626085	Y RNA [Source:RFAM;Acc:RF00019]
ENSG00000119977	TCTN3	0.00627286	tectonic family member 3 [Source:HGNC Symbol;Acc:HGNC:24519]
ENSG00000132155	RAF1	0.00627535	Raf-1 proto-oncogene, serine/threonine kinase [Source:HGNC Symbol;Acc:HGNC:9829]
ENSG00000212214	NA	0.00631254	Small nucleolar RNA SNORA48 [Source:RFAM;Acc:RF00554]
ENSG00000187969	ZCCHC13	0.0063132	zinc finger, CCHC domain containing 13 [Source:HGNC Symbol;Acc:HGNC:31749]
ENSG00000170310	STX8	0.00631407	syntaxin 8 [Source:HGNC Symbol;Acc:HGNC:11443]
ENSG00000177479	ARIH2	0.00634987	ariadne RBR E3 ubiquitin protein ligase 2 [Source:HGNC Symbol;Acc:HGNC:690]
ENSG00000075856	SART3	0.00637822	squamous cell carcinoma antigen recognized by T cells 3 [Source:HGNC Symbol;Acc:HGNC:16860]
ENSG00000141040	ZNF287	0.00639467	zinc finger protein 287 [Source:HGNC Symbol;Acc:HGNC:13502]
ENSG00000112110	MRPL18	0.00640339	mitochondrial ribosomal protein L18 [Source:HGNC Symbol;Acc:HGNC:14477]
ENSG00000185352	HS6ST3	0.00641473	heparan sulfate 6-O-sulfotransferase 3 [Source:HGNC Symbol;Acc:HGNC:19134]
ENSG00000204001	LCN8	0.00641992	lipocalin 8 [Source:HGNC Symbol;Acc:HGNC:27038]
ENSG00000174485	DENND4A	0.00642321	DENN/MADD domain containing 4A [Source:HGNC Symbol;Acc:HGNC:24321]
ENSG00000110958	PTGES3	0.00643252	prostaglandin E synthase 3 (cytosolic) [Source:HGNC Symbol;Acc:HGNC:16049]
ENSG00000129292	PHF20L1	0.00647429	PHD finger protein 20-like 1 [Source:HGNC Symbol;Acc:HGNC:24280]
ENSG00000212396	RNA5SP323	0.0065063	RNA, 5S ribosomal pseudogene 323 [Source:HGNC Symbol;Acc:HGNC:43223]
ENSG00000171953	ATPAF2	0.00653559	ATP synthase mitochondrial F1 complex assembly factor 2 [Source:HGNC Symbol;Acc:HGNC:18802]
ENSG00000127334	DYRK2	0.0065366	dual-specificity tyrosine-(Y)-phosphorylation regulated kinase 2 [Source:HGNC Symbol;Acc:HGNC:3093]
ENSG00000123684	LPGAT1	0.00656458	lysophosphatidylglycerol acyltransferase 1 [Source:HGNC Symbol;Acc:HGNC:28985]
ENSG00000124357	NAGK	0.00659406	N-acetylglucosamine kinase [Source:HGNC Symbol;Acc:HGNC:17174]
ENSG00000187908	DMBT1	0.00662741	deleted in malignant brain tumors 1 [Source:HGNC Symbol;Acc:HGNC:2926]
ENSG00000167080	B4GALNT2	0.00662751	beta-1,4-N-acetyl-galactosaminyl transferase 2 [Source:HGNC Symbol;Acc:HGNC:24136]
ENSG00000117560	FASLG	0.00663106	Fas ligand (TNF superfamily, member 6) [Source:HGNC Symbol;Acc:HGNC:11936]
ENSG00000172995	ARPP21	0.00663187	cAMP-regulated phosphoprotein, 21kDa [Source:HGNC Symbol;Acc:HGNC:16968]
ENSG00000167083	GNGT2	0.00665327	guanine nucleotide binding protein (G protein), gamma transducing activity polypeptide 2 [Source:HGNC Symbol;Acc:HGNC:4412]
ENSG00000179409	GEMIN4	0.00666089	gem (nuclear organelle) associated protein 4 [Source:HGNC Symbol;Acc:HGNC:15717]
ENSG00000182263	FIGN	0.0067134	fidgetin [Source:HGNC Symbol;Acc:HGNC:13285]
ENSG00000153347	FAM81B	0.0067307	family with sequence similarity 81, member B [Source:HGNC Symbol;Acc:HGNC:26335]
ENSG00000164944	KIAA1429	0.00675094	KIAA1429 [Source:HGNC Symbol;Acc:HGNC:24500]
ENSG00000139970	RTN1	0.00675718	reticulon 1 [Source:HGNC Symbol;Acc:HGNC:10467]
ENSG00000166439	RNF169	0.00676791	ring finger protein 169 [Source:HGNC Symbol;Acc:HGNC:26961]
ENSG00000121289	CEP89	0.00677166	centrosomal protein 89kDa [Source:HGNC Symbol;Acc:HGNC:25907]
ENSG00000252121	RNU6-970P	0.00681922	RNA, U6 small nuclear 970, pseudogene [Source:HGNC Symbol;Acc:HGNC:47933]
ENSG00000155189	AGPAT5	0.00682644	1-acylglycerol-3-phosphate O-acyltransferase 5 [Source:HGNC Symbol;Acc:HGNC:20886]
ENSG00000204642	HLA-F	0.00682653	major histocompatibility complex, class I, F [Source:HGNC Symbol;Acc:HGNC:4963]
ENSG00000166716	ZNF592	0.0068472	zinc finger protein 592 [Source:HGNC Symbol;Acc:HGNC:28986]
ENSG00000183432	ZBTB8OSP1	0.00685874	zinc finger and BTB domain containing 8 opposite strand pseudogene 1 [Source:HGNC Symbol;Acc:HGNC:19043]
ENSG00000167840	ZNF232	0.00688337	zinc finger protein 232 [Source:HGNC Symbol;Acc:HGNC:13026]
ENSG00000188483	IER5L	0.00690478	immediate early response 5-like [Source:HGNC Symbol;Acc:HGNC:23679]
ENSG00000065427	KARS	0.00692065	lysyl-tRNA synthetase [Source:HGNC Symbol;Acc:HGNC:6215]
ENSG00000165995	CACNB2	0.00692575	calcium channel, voltage-dependent, beta 2 subunit [Source:HGNC Symbol;Acc:HGNC:1402]
ENSG00000132000	PODNL1	0.00697183	podocan-like 1 [Source:HGNC Symbol;Acc:HGNC:26275]
ENSG00000175514	GPR152	0.00698704	G protein-coupled receptor 152 [Source:HGNC Symbol;Acc:HGNC:23622]
ENSG00000109472	CPE	0.00699129	carboxypeptidase E [Source:HGNC Symbol;Acc:HGNC:2303]
ENSG00000171401	KRT13	0.00701767	keratin 13 [Source:HGNC Symbol;Acc:HGNC:6415]
ENSG00000113504	SLC12A7	0.0070564	solute carrier family 12 (potassium/chloride transporter), member 7 [Source:HGNC Symbol;Acc:HGNC:10915]
ENSG00000117362	APH1A	0.00707082	APH1A gamma secretase subunit [Source:HGNC Symbol;Acc:HGNC:29509]
ENSG00000231782	LINC00575	0.00710249	long intergenic non-protein coding RNA 575 [Source:HGNC Symbol;Acc:HGNC:21342]
ENSG00000123329	ARHGAP9	0.00710427	Rho GTPase activating protein 9 [Source:HGNC Symbol;Acc:HGNC:14130]
ENSG00000149305	HTR3B	0.0071319	5-hydroxytryptamine (serotonin) receptor 3B, ionotropic [Source:HGNC Symbol;Acc:HGNC:5298]
ENSG00000165410	CFL2	0.00714684	cofilin 2 (muscle) [Source:HGNC Symbol;Acc:HGNC:1875]
ENSG00000175931	UBE2O	0.00715327	ubiquitin-conjugating enzyme E2O [Source:HGNC Symbol;Acc:HGNC:29554]
ENSG00000163833	FBXO40	0.00717398	F-box protein 40 [Source:HGNC Symbol;Acc:HGNC:29816]
ENSG00000095596	CYP26A1	0.0071781	cytochrome P450, family 26, subfamily A, polypeptide 1 [Source:HGNC Symbol;Acc:HGNC:2603]
ENSG00000165588	OTX2	0.00718331	orthodenticle homeobox 2 [Source:HGNC Symbol;Acc:HGNC:8522]
ENSG00000115204	MPV17	0.00718923	MpV17 mitochondrial inner membrane protein [Source:HGNC Symbol;Acc:HGNC:7224]
ENSG00000016391	CHDH	0.00719412	choline dehydrogenase [Source:HGNC Symbol;Acc:HGNC:24288]
ENSG00000106144	CASP2	0.00720317	caspase 2, apoptosis-related cysteine peptidase [Source:HGNC Symbol;Acc:HGNC:1503]
ENSG00000167699	GLOD4	0.00720608	glyoxalase domain containing 4 [Source:HGNC Symbol;Acc:HGNC:14111]
ENSG00000161526	SAP30BP	0.00726603	SAP30 binding protein [Source:HGNC Symbol;Acc:HGNC:30785]
ENSG00000185518	SV2B	0.00727105	synaptic vesicle glycoprotein 2B [Source:HGNC Symbol;Acc:HGNC:16874]
ENSG00000110848	CD69	0.00730738	CD69 molecule [Source:HGNC Symbol;Acc:HGNC:1694]
ENSG00000198920	KIAA0753	0.00731329	KIAA0753 [Source:HGNC Symbol;Acc:HGNC:29110]
ENSG00000092820	EZR	0.00731976	ezrin [Source:HGNC Symbol;Acc:HGNC:12691]
ENSG00000168928	CTRB2	0.00734133	chymotrypsinogen B2 [Source:HGNC Symbol;Acc:HGNC:2522]
ENSG00000187323	DCC	0.00734606	DCC netrin 1 receptor [Source:HGNC Symbol;Acc:HGNC:2701]
ENSG00000100784	RPS6KA5	0.00737554	ribosomal protein S6 kinase, 90kDa, polypeptide 5 [Source:HGNC Symbol;Acc:HGNC:10434]
ENSG00000179029	TMEM107	0.00742627	transmembrane protein 107 [Source:HGNC Symbol;Acc:HGNC:28128]
ENSG00000177453	NIM1K	0.00742988	NIM1 serine/threonine protein kinase [Source:HGNC Symbol;Acc:HGNC:28646]
ENSG00000081791	KIAA0141	0.00744016	KIAA0141 [Source:HGNC Symbol;Acc:HGNC:28969]
ENSG00000200048	RNU6-812P	0.0074575	RNA, U6 small nuclear 812, pseudogene [Source:HGNC Symbol;Acc:HGNC:47775]
ENSG00000185722	ANKFY1	0.00749374	ankyrin repeat and FYVE domain containing 1 [Source:HGNC Symbol;Acc:HGNC:20763]
ENSG00000228398	HMGN2P25	0.00749758	high mobility group nucleosomal binding domain 2 pseudogene 25 [Source:HGNC Symbol;Acc:HGNC:39392]
ENSG00000197067	OR2T32P	0.00751813	olfactory receptor, family 2, subfamily T, member 32 pseudogene [Source:HGNC Symbol;Acc:HGNC:31254]
ENSG00000111615	KRR1	0.00752278	KRR1, small subunit (SSU) processome component, homolog (yeast) [Source:HGNC Symbol;Acc:HGNC:5176]
ENSG00000198026	ZNF335	0.0075343	zinc finger protein 335 [Source:HGNC Symbol;Acc:HGNC:15807]
ENSG00000095794	CREM	0.00753576	cAMP responsive element modulator [Source:HGNC Symbol;Acc:HGNC:2352]
ENSG00000240173	RN7SL771P	0.00754878	RNA, 7SL, cytoplasmic 771, pseudogene [Source:HGNC Symbol;Acc:HGNC:46787]
ENSG00000102362	SYTL4	0.0075746	synaptotagmin-like 4 [Source:HGNC Symbol;Acc:HGNC:15588]
ENSG00000275126	HIST1H4L	0.00761442	histone cluster 1, H4l [Source:HGNC Symbol;Acc:HGNC:4791]
ENSG00000235865	GSN-AS1	0.00763647	GSN antisense RNA 1 [Source:HGNC Symbol;Acc:HGNC:23372]
ENSG00000252742	NA	0.00764357	Y RNA [Source:RFAM;Acc:RF00019]
ENSG00000137440	FGFBP1	0.00764907	fibroblast growth factor binding protein 1 [Source:HGNC Symbol;Acc:HGNC:19695]
ENSG00000006756	ARSD	0.00765877	arylsulfatase D [Source:HGNC Symbol;Acc:HGNC:717]
ENSG00000188229	TUBB4B	0.00766144	tubulin, beta 4B class IVb [Source:HGNC Symbol;Acc:HGNC:20771]
ENSG00000149633	KIAA1755	0.00767543	KIAA1755 [Source:HGNC Symbol;Acc:HGNC:29372]
ENSG00000169604	ANTXR1	0.00770093	anthrax toxin receptor 1 [Source:HGNC Symbol;Acc:HGNC:21014]
ENSG00000200842	NA	0.00772993	Y RNA [Source:RFAM;Acc:RF00019]
ENSG00000207312	RNU6-429P	0.00778622	RNA, U6 small nuclear 429, pseudogene [Source:HGNC Symbol;Acc:HGNC:47392]
ENSG00000178055	PRSS42	0.00786168	protease, serine, 42 [Source:HGNC Symbol;Acc:HGNC:30716]
ENSG00000205867	KRTAP5-2	0.00793992	keratin associated protein 5-2 [Source:HGNC Symbol;Acc:HGNC:23597]
ENSG00000225921	NOL7	0.00795098	nucleolar protein 7, 27kDa [Source:HGNC Symbol;Acc:HGNC:21040]
ENSG00000240584	RN7SL547P	0.0079534	RNA, 7SL, cytoplasmic 547, pseudogene [Source:HGNC Symbol;Acc:HGNC:46563]
ENSG00000166411	IDH3A	0.00795697	isocitrate dehydrogenase 3 (NAD+) alpha [Source:HGNC Symbol;Acc:HGNC:5384]
ENSG00000055163	CYFIP2	0.00795999	cytoplasmic FMR1 interacting protein 2 [Source:HGNC Symbol;Acc:HGNC:13760]
ENSG00000072415	MPP5	0.00799111	membrane protein, palmitoylated 5 (MAGUK p55 subfamily member 5) [Source:HGNC Symbol;Acc:HGNC:18669]
ENSG00000165985	C1QL3	0.00799722	complement component 1, q subcomponent-like 3 [Source:HGNC Symbol;Acc:HGNC:19359]
ENSG00000178971	CTC1	0.00804357	CTS telomere maintenance complex component 1 [Source:HGNC Symbol;Acc:HGNC:26169]
ENSG00000102786	INTS6	0.00805668	integrator complex subunit 6 [Source:HGNC Symbol;Acc:HGNC:14879]
ENSG00000148429	USP6NL	0.00806357	USP6 N-terminal like [Source:HGNC Symbol;Acc:HGNC:16858]
ENSG00000198894	CIPC	0.00806696	CLOCK-interacting pacemaker [Source:HGNC Symbol;Acc:HGNC:20365]
ENSG00000187730	GABRD	0.00807824	gamma-aminobutyric acid (GABA) A receptor, delta [Source:HGNC Symbol;Acc:HGNC:4084]
ENSG00000200566	RNU5F-7P	0.00810944	RNA, U5F small nuclear 7, pseudogene [Source:HGNC Symbol;Acc:HGNC:42524]
ENSG00000142327	RNPEPL1	0.00811066	arginyl aminopeptidase (aminopeptidase B)-like 1 [Source:HGNC Symbol;Acc:HGNC:10079]
ENSG00000170584	NUDCD2	0.008129	NudC domain containing 2 [Source:HGNC Symbol;Acc:HGNC:30535]
ENSG00000089050	RBBP9	0.00813684	retinoblastoma binding protein 9 [Source:HGNC Symbol;Acc:HGNC:9892]
ENSG00000100603	SNW1	0.00818793	SNW domain containing 1 [Source:HGNC Symbol;Acc:HGNC:16696]
ENSG00000139287	TPH2	0.00819448	tryptophan hydroxylase 2 [Source:HGNC Symbol;Acc:HGNC:20692]
ENSG00000125450	NUP85	0.00819563	nucleoporin 85kDa [Source:HGNC Symbol;Acc:HGNC:8734]
ENSG00000031698	SARS	0.00819904	seryl-tRNA synthetase [Source:HGNC Symbol;Acc:HGNC:10537]
ENSG00000111300	NAA25	0.00820307	N(alpha)-acetyltransferase 25, NatB auxiliary subunit [Source:HGNC Symbol;Acc:HGNC:25783]
ENSG00000169727	GPS1	0.00820988	G protein pathway suppressor 1 [Source:HGNC Symbol;Acc:HGNC:4549]
ENSG00000182796	TMEM198B	0.0082337	transmembrane protein 198B, pseudogene [Source:HGNC Symbol;Acc:HGNC:43629]
ENSG00000156284	CLDN8	0.00830715	claudin 8 [Source:HGNC Symbol;Acc:HGNC:2050]
ENSG00000196248	OR10S1	0.00832737	olfactory receptor, family 10, subfamily S, member 1 [Source:HGNC Symbol;Acc:HGNC:14807]
ENSG00000142949	PTPRF	0.00833361	protein tyrosine phosphatase, receptor type, F [Source:HGNC Symbol;Acc:HGNC:9670]
ENSG00000141433	ADCYAP1	0.00837049	adenylate cyclase activating polypeptide 1 (pituitary) [Source:HGNC Symbol;Acc:HGNC:241]
ENSG00000204540	PSORS1C1	0.00841975	psoriasis susceptibility 1 candidate 1 [Source:HGNC Symbol;Acc:HGNC:17202]
ENSG00000233816	IFNA13	0.00842969	interferon, alpha 13 [Source:HGNC Symbol;Acc:HGNC:5419]
ENSG00000155093	PTPRN2	0.00843104	protein tyrosine phosphatase, receptor type, N polypeptide 2 [Source:HGNC Symbol;Acc:HGNC:9677]
ENSG00000182197	EXT1	0.00843621	exostosin glycosyltransferase 1 [Source:HGNC Symbol;Acc:HGNC:3512]
ENSG00000199765	RNU6-363P	0.00844158	RNA, U6 small nuclear 363, pseudogene [Source:HGNC Symbol;Acc:HGNC:47326]
ENSG00000174010	KLHL15	0.00848849	kelch-like family member 15 [Source:HGNC Symbol;Acc:HGNC:29347]
ENSG00000186376	ZNF75D	0.00848969	zinc finger protein 75D [Source:HGNC Symbol;Acc:HGNC:13145]
ENSG00000168071	CCDC88B	0.00851428	coiled-coil domain containing 88B [Source:HGNC Symbol;Acc:HGNC:26757]
ENSG00000141503	MINK1	0.00855868	misshapen-like kinase 1 [Source:HGNC Symbol;Acc:HGNC:17565]
ENSG00000135316	SYNCRIP	0.00856163	synaptotagmin binding, cytoplasmic RNA interacting protein [Source:HGNC Symbol;Acc:HGNC:16918]
ENSG00000252358	RN7SKP135	0.00861554	RNA, 7SK small nuclear pseudogene 135 [Source:HGNC Symbol;Acc:HGNC:45859]
ENSG00000006625	GGCT	0.00861921	gamma-glutamylcyclotransferase [Source:HGNC Symbol;Acc:HGNC:21705]
ENSG00000151838	CCDC175	0.00868719	coiled-coil domain containing 175 [Source:HGNC Symbol;Acc:HGNC:19847]
ENSG00000143125	PROK1	0.00870133	prokineticin 1 [Source:HGNC Symbol;Acc:HGNC:18454]
ENSG00000162980	ARL5A	0.00870508	ADP-ribosylation factor-like 5A [Source:HGNC Symbol;Acc:HGNC:696]
ENSG00000085871	MGST2	0.00871059	microsomal glutathione S-transferase 2 [Source:HGNC Symbol;Acc:HGNC:7063]
ENSG00000174231	PRPF8	0.00872885	pre-mRNA processing factor 8 [Source:HGNC Symbol;Acc:HGNC:17340]
ENSG00000106771	TMEM245	0.00873428	transmembrane protein 245 [Source:HGNC Symbol;Acc:HGNC:1363]
ENSG00000186106	ANKRD46	0.00874634	ankyrin repeat domain 46 [Source:HGNC Symbol;Acc:HGNC:27229]
ENSG00000163872	YEATS2	0.00874679	YEATS domain containing 2 [Source:HGNC Symbol;Acc:HGNC:25489]
ENSG00000137168	PPIL1	0.00876442	peptidylprolyl isomerase (cyclophilin)-like 1 [Source:HGNC Symbol;Acc:HGNC:9260]
ENSG00000197241	SLC2A7	0.00876535	solute carrier family 2 (facilitated glucose transporter), member 7 [Source:HGNC Symbol;Acc:HGNC:13445]
ENSG00000121634	GJA8	0.00877426	gap junction protein, alpha 8, 50kDa [Source:HGNC Symbol;Acc:HGNC:4281]
ENSG00000166145	SPINT1	0.00877737	serine peptidase inhibitor, Kunitz type 1 [Source:HGNC Symbol;Acc:HGNC:11246]
ENSG00000206863	RNU5A-6P	0.0087816	RNA, U5A small nuclear 6, pseudogene [Source:HGNC Symbol;Acc:HGNC:42527]
ENSG00000174225	ARL13A	0.00878631	ADP-ribosylation factor-like 13A [Source:HGNC Symbol;Acc:HGNC:31709]
ENSG00000125409	TEKT3	0.00879524	tektin 3 [Source:HGNC Symbol;Acc:HGNC:14293]
ENSG00000212319	NA	0.00881737	Y RNA [Source:RFAM;Acc:RF00019]
ENSG00000117155	SSX2IP	0.00881747	synovial sarcoma, X breakpoint 2 interacting protein [Source:HGNC Symbol;Acc:HGNC:16509]
ENSG00000078487	ZCWPW1	0.00884317	zinc finger, CW type with PWWP domain 1 [Source:HGNC Symbol;Acc:HGNC:23486]
ENSG00000167470	MIDN	0.00886736	midnolin [Source:HGNC Symbol;Acc:HGNC:16298]
ENSG00000108797	CNTNAP1	0.00887534	contactin associated protein 1 [Source:HGNC Symbol;Acc:HGNC:8011]
ENSG00000200208	NA	0.00893048	Y RNA [Source:RFAM;Acc:RF00019]
ENSG00000188782	CATSPER4	0.00893253	cation channel, sperm associated 4 [Source:HGNC Symbol;Acc:HGNC:23220]
ENSG00000138678	AGPAT9	0.00895233	1-acylglycerol-3-phosphate O-acyltransferase 9 [Source:HGNC Symbol;Acc:HGNC:28157]
ENSG00000256713	PGA5	0.00900345	pepsinogen 5, group I (pepsinogen A) [Source:HGNC Symbol;Acc:HGNC:8887]
ENSG00000134597	RBMX2	0.00900596	RNA binding motif protein, X-linked 2 [Source:HGNC Symbol;Acc:HGNC:24282]
ENSG00000133317	LGALS12	0.00901295	lectin, galactoside-binding, soluble, 12 [Source:HGNC Symbol;Acc:HGNC:15788]
ENSG00000164008	C1orf50	0.00902223	chromosome 1 open reading frame 50 [Source:HGNC Symbol;Acc:HGNC:28795]
ENSG00000207614	MIR193A	0.00903668	microRNA 193a [Source:HGNC Symbol;Acc:HGNC:31563]
ENSG00000014257	ACPP	0.00904657	acid phosphatase, prostate [Source:HGNC Symbol;Acc:HGNC:125]
ENSG00000102189	EEA1	0.0090473	early endosome antigen 1 [Source:HGNC Symbol;Acc:HGNC:3185]
ENSG00000163577	EIF5A2	0.00905243	eukaryotic translation initiation factor 5A2 [Source:HGNC Symbol;Acc:HGNC:3301]
ENSG00000128965	CHAC1	0.00905522	ChaC, cation transport regulator homolog 1 (E. coli) [Source:HGNC Symbol;Acc:HGNC:28680]
ENSG00000163009	C2orf48	0.00906395	chromosome 2 open reading frame 48 [Source:HGNC Symbol;Acc:HGNC:26322]
ENSG00000074410	CA12	0.00907271	carbonic anhydrase XII [Source:HGNC Symbol;Acc:HGNC:1371]
ENSG00000137876	RSL24D1	0.00908165	ribosomal L24 domain containing 1 [Source:HGNC Symbol;Acc:HGNC:18479]
ENSG00000196456	ZNF775	0.00908306	zinc finger protein 775 [Source:HGNC Symbol;Acc:HGNC:28501]
ENSG00000172500	FIBP	0.00909212	fibroblast growth factor (acidic) intracellular binding protein [Source:HGNC Symbol;Acc:HGNC:3705]
ENSG00000130699	TAF4	0.00909212	TAF4 RNA polymerase II, TATA box binding protein (TBP)-associated factor, 135kDa [Source:HGNC Symbol;Acc:HGNC:11537]
ENSG00000113361	CDH6	0.00909704	cadherin 6, type 2, K-cadherin (fetal kidney) [Source:HGNC Symbol;Acc:HGNC:1765]
ENSG00000175697	GPR156	0.00912651	G protein-coupled receptor 156 [Source:HGNC Symbol;Acc:HGNC:20844]
ENSG00000164038	SLC9B2	0.00914927	solute carrier family 9, subfamily B (NHA2, cation proton antiporter 2), member 2 [Source:HGNC Symbol;Acc:HGNC:25143]
ENSG00000168005	C11orf84	0.00917129	chromosome 11 open reading frame 84 [Source:HGNC Symbol;Acc:HGNC:25115]
ENSG00000113645	WWC1	0.00920521	WW and C2 domain containing 1 [Source:HGNC Symbol;Acc:HGNC:29435]
ENSG00000252385	RNU6-68P	0.00923637	RNA, U6 small nuclear 68, pseudogene [Source:HGNC Symbol;Acc:HGNC:42558]
ENSG00000140538	NTRK3	0.00925214	neurotrophic tyrosine kinase, receptor, type 3 [Source:HGNC Symbol;Acc:HGNC:8033]
ENSG00000123447	TYRL	0.00926647	tyrosinase-like (pseudogene) [Source:HGNC Symbol;Acc:HGNC:12443]
ENSG00000206881	RNU6-190P	0.00927373	RNA, U6 small nuclear 190, pseudogene [Source:HGNC Symbol;Acc:HGNC:47153]
ENSG00000157106	SMG1	0.00931487	SMG1 phosphatidylinositol 3-kinase-related kinase [Source:HGNC Symbol;Acc:HGNC:30045]
ENSG00000175582	RAB6A	0.00933713	RAB6A, member RAS oncogene family [Source:HGNC Symbol;Acc:HGNC:9786]
ENSG00000071677	PRLH	0.00935704	prolactin releasing hormone [Source:HGNC Symbol;Acc:HGNC:17945]
ENSG00000181126	HLA-V	0.00936879	major histocompatibility complex, class I, V (pseudogene) [Source:HGNC Symbol;Acc:HGNC:23482]
ENSG00000162551	ALPL	0.00938075	alkaline phosphatase, liver/bone/kidney [Source:HGNC Symbol;Acc:HGNC:438]
ENSG00000154124	OTULIN	0.00938498	OTU deubiquitinase with linear linkage specificity [Source:HGNC Symbol;Acc:HGNC:25118]
ENSG00000183206	POTEC	0.00943177	POTE ankyrin domain family, member C [Source:HGNC Symbol;Acc:HGNC:33894]
ENSG00000206836	RNU6-1029P	0.00946137	RNA, U6 small nuclear 1029, pseudogene [Source:HGNC Symbol;Acc:HGNC:47992]
ENSG00000198795	ZNF521	0.00947593	zinc finger protein 521 [Source:HGNC Symbol;Acc:HGNC:24605]
ENSG00000183145	RIPPLY3	0.00957706	ripply transcriptional repressor 3 [Source:HGNC Symbol;Acc:HGNC:3047]
ENSG00000101997	CCDC22	0.00959356	coiled-coil domain containing 22 [Source:HGNC Symbol;Acc:HGNC:28909]
ENSG00000185920	PTCH1	0.00959363	patched 1 [Source:HGNC Symbol;Acc:HGNC:9585]
ENSG00000206557	TRIM71	0.00965029	tripartite motif containing 71, E3 ubiquitin protein ligase [Source:HGNC Symbol;Acc:HGNC:32669]
ENSG00000122711	SPINK4	0.00965318	serine peptidase inhibitor, Kazal type 4 [Source:HGNC Symbol;Acc:HGNC:16646]
ENSG00000204625	HCG9	0.00966734	HLA complex group 9 (non-protein coding) [Source:HGNC Symbol;Acc:HGNC:21243]
ENSG00000174498	IGDCC3	0.00969385	immunoglobulin superfamily, DCC subclass, member 3 [Source:HGNC Symbol;Acc:HGNC:9700]
ENSG00000239640	RN7SL62P	0.00971852	RNA, 7SL, cytoplasmic 62, pseudogene [Source:HGNC Symbol;Acc:HGNC:46078]
ENSG00000277157	HIST1H4D	0.00974198	histone cluster 1, H4d [Source:HGNC Symbol;Acc:HGNC:4782]
ENSG00000122025	FLT3	0.00974301	fms-related tyrosine kinase 3 [Source:HGNC Symbol;Acc:HGNC:3765]
ENSG00000053747	LAMA3	0.00975919	laminin, alpha 3 [Source:HGNC Symbol;Acc:HGNC:6483]
ENSG00000120832	MTERF2	0.00977449	mitochondrial transcription termination factor 2 [Source:HGNC Symbol;Acc:HGNC:30779]
ENSG00000069493	CLEC2D	0.00982308	C-type lectin domain family 2, member D [Source:HGNC Symbol;Acc:HGNC:14351]
ENSG00000135775	COG2	0.00985083	component of oligomeric golgi complex 2 [Source:HGNC Symbol;Acc:HGNC:6546]
ENSG00000207198	RNU6-1195P	0.00986318	RNA, U6 small nuclear 1195, pseudogene [Source:HGNC Symbol;Acc:HGNC:48158]
ENSG00000152291	TGOLN2	0.00987684	trans-golgi network protein 2 [Source:HGNC Symbol;Acc:HGNC:15450]
ENSG00000259334	LINC00596	0.00988373	long intergenic non-protein coding RNA 596 [Source:HGNC Symbol;Acc:HGNC:23167]
ENSG00000213047	DENND1B	0.00988924	DENN/MADD domain containing 1B [Source:HGNC Symbol;Acc:HGNC:28404]
ENSG00000124915	NA	0.00989828	uncharacterized LOC26070 [Source:EntrezGene;Acc:26070]
ENSG00000261236	BOP1	0.00990484	block of proliferation 1 [Source:HGNC Symbol;Acc:HGNC:15519]
ENSG00000171840	NINJ2	0.0099223	ninjurin 2 [Source:HGNC Symbol;Acc:HGNC:7825]
ENSG00000201325	RNA5SP142	0.00992622	RNA, 5S ribosomal pseudogene 142 [Source:HGNC Symbol;Acc:HGNC:43042]
ENSG00000183324	REC114	0.009927	REC114 meiotic recombination protein [Source:HGNC Symbol;Acc:HGNC:25065]
ENSG00000151360	ALLC	0.00995069	allantoicase [Source:HGNC Symbol;Acc:HGNC:17377]
ENSG00000051108	HERPUD1	0.00997221	homocysteine-inducible, endoplasmic reticulum stress-inducible, ubiquitin-like domain member 1 [Source:HGNC Symbol;Acc:HGNC:13744]
ENSG00000127483	HP1BP3	0.00998353	heterochromatin protein 1, binding protein 3 [Source:HGNC Symbol;Acc:HGNC:24973]
ENSG00000181778	TMEM252	0.00998857	transmembrane protein 252 [Source:HGNC Symbol;Acc:HGNC:28537]
ENSG00000174450	GOLGA6L2	0.00999725	golgin A6 family-like 2 [Source:HGNC Symbol;Acc:HGNC:26695]
ENSG00000143751	SDE2	0.0100327	SDE2 telomere maintenance homolog (S. pombe) [Source:HGNC Symbol;Acc:HGNC:26643]
ENSG00000171793	CTPS1	0.010034	CTP synthase 1 [Source:HGNC Symbol;Acc:HGNC:2519]
ENSG00000157890	MEGF11	0.0100451	multiple EGF-like-domains 11 [Source:HGNC Symbol;Acc:HGNC:29635]
ENSG00000119682	AREL1	0.0100504	apoptosis resistant E3 ubiquitin protein ligase 1 [Source:HGNC Symbol;Acc:HGNC:20363]
ENSG00000178295	GEN1	0.0100583	GEN1 Holliday junction 5' flap endonuclease [Source:HGNC Symbol;Acc:HGNC:26881]
ENSG00000075223	SEMA3C	0.0100599	sema domain, immunoglobulin domain (Ig), short basic domain, secreted, (semaphorin) 3C [Source:HGNC Symbol;Acc:HGNC:10725]
ENSG00000174574	AKIRIN1	0.0100707	akirin 1 [Source:HGNC Symbol;Acc:HGNC:25744]
ENSG00000025039	RRAGD	0.0100859	Ras-related GTP binding D [Source:HGNC Symbol;Acc:HGNC:19903]
ENSG00000181467	RAP2B	0.0100921	RAP2B, member of RAS oncogene family [Source:HGNC Symbol;Acc:HGNC:9862]
ENSG00000240940	RN7SL591P	0.0101089	RNA, 7SL, cytoplasmic 591, pseudogene [Source:HGNC Symbol;Acc:HGNC:46607]
ENSG00000101166	SLMO2	0.0101193	slowmo homolog 2 (Drosophila) [Source:HGNC Symbol;Acc:HGNC:15892]
ENSG00000158615	PPP1R15B	0.0101561	protein phosphatase 1, regulatory subunit 15B [Source:HGNC Symbol;Acc:HGNC:14951]
ENSG00000135740	SLC9A5	0.0101644	solute carrier family 9, subfamily A (NHE5, cation proton antiporter 5), member 5 [Source:HGNC Symbol;Acc:HGNC:11078]
ENSG00000161544	CYGB	0.0101726	cytoglobin [Source:HGNC Symbol;Acc:HGNC:16505]
ENSG00000181690	PLAG1	0.0102008	pleiomorphic adenoma gene 1 [Source:HGNC Symbol;Acc:HGNC:9045]
ENSG00000163738	MTHFD2L	0.0102062	methylenetetrahydrofolate dehydrogenase (NADP+ dependent) 2-like [Source:HGNC Symbol;Acc:HGNC:31865]
ENSG00000166159	LRTM2	0.0102073	leucine-rich repeats and transmembrane domains 2 [Source:HGNC Symbol;Acc:HGNC:32443]
ENSG00000161509	GRIN2C	0.0102229	glutamate receptor, ionotropic, N-methyl D-aspartate 2C [Source:HGNC Symbol;Acc:HGNC:4587]
ENSG00000235217	TSPY26P	0.0102362	testis specific protein, Y-linked 26, pseudogene [Source:HGNC Symbol;Acc:HGNC:16256]
ENSG00000072818	ACAP1	0.0102863	ArfGAP with coiled-coil, ankyrin repeat and PH domains 1 [Source:HGNC Symbol;Acc:HGNC:16467]
ENSG00000164080	RAD54L2	0.0103186	RAD54-like 2 (S. cerevisiae) [Source:HGNC Symbol;Acc:HGNC:29123]
ENSG00000100575	TIMM9	0.0103476	translocase of inner mitochondrial membrane 9 homolog (yeast) [Source:HGNC Symbol;Acc:HGNC:11819]
ENSG00000139625	MAP3K12	0.0103505	mitogen-activated protein kinase kinase kinase 12 [Source:HGNC Symbol;Acc:HGNC:6851]
ENSG00000161149	TUBA3FP	0.0103515	tubulin, alpha 3f, pseudogene [Source:HGNC Symbol;Acc:HGNC:24067]
ENSG00000159763	PIP	0.0104009	prolactin-induced protein [Source:HGNC Symbol;Acc:HGNC:8993]
ENSG00000162931	TRIM17	0.0104121	tripartite motif containing 17 [Source:HGNC Symbol;Acc:HGNC:13430]
ENSG00000252897	RNU6-685P	0.0104394	RNA, U6 small nuclear 685, pseudogene [Source:HGNC Symbol;Acc:HGNC:47648]
ENSG00000149243	KLHL35	0.0104452	kelch-like family member 35 [Source:HGNC Symbol;Acc:HGNC:26597]
ENSG00000171540	OTP	0.0104621	orthopedia homeobox [Source:HGNC Symbol;Acc:HGNC:8518]
ENSG00000116809	ZBTB17	0.0104734	zinc finger and BTB domain containing 17 [Source:HGNC Symbol;Acc:HGNC:12936]
ENSG00000207300	NA	0.0104933	Y RNA [Source:RFAM;Acc:RF00019]
ENSG00000157470	FAM81A	0.010496	family with sequence similarity 81, member A [Source:HGNC Symbol;Acc:HGNC:28379]
ENSG00000092009	CMA1	0.0105009	chymase 1, mast cell [Source:HGNC Symbol;Acc:HGNC:2097]
ENSG00000067191	CACNB1	0.0105088	calcium channel, voltage-dependent, beta 1 subunit [Source:HGNC Symbol;Acc:HGNC:1401]
ENSG00000167100	SAMD14	0.0105107	sterile alpha motif domain containing 14 [Source:HGNC Symbol;Acc:HGNC:27312]
ENSG00000160602	NEK8	0.0105231	NIMA-related kinase 8 [Source:HGNC Symbol;Acc:HGNC:13387]
ENSG00000243274	RN7SL571P	0.0105665	RNA, 7SL, cytoplasmic 571, pseudogene [Source:HGNC Symbol;Acc:HGNC:46587]
ENSG00000184574	LPAR5	0.0105892	lysophosphatidic acid receptor 5 [Source:HGNC Symbol;Acc:HGNC:13307]
ENSG00000166750	SLFN5	0.0105966	schlafen family member 5 [Source:HGNC Symbol;Acc:HGNC:28286]
ENSG00000167842	MIS12	0.0106119	MIS12 kinetochore complex component [Source:HGNC Symbol;Acc:HGNC:24967]
ENSG00000207160	RNU6-1289P	0.0106135	RNA, U6 small nuclear 1289, pseudogene [Source:HGNC Symbol;Acc:HGNC:48252]
ENSG00000137266	SLC22A23	0.0106177	solute carrier family 22, member 23 [Source:HGNC Symbol;Acc:HGNC:21106]
ENSG00000027869	SH2D2A	0.0106414	SH2 domain containing 2A [Source:HGNC Symbol;Acc:HGNC:10821]
ENSG00000212626	NA	0.0106617	Small nucleolar RNA SNORA48 [Source:RFAM;Acc:RF00554]
ENSG00000198218	QRICH1	0.0106678	glutamine-rich 1 [Source:HGNC Symbol;Acc:HGNC:24713]
ENSG00000179008	C14orf39	0.0106781	chromosome 14 open reading frame 39 [Source:HGNC Symbol;Acc:HGNC:19849]
ENSG00000252752	RNU6-210P	0.0107202	RNA, U6 small nuclear 210, pseudogene [Source:HGNC Symbol;Acc:HGNC:47173]
ENSG00000130748	TMEM160	0.0107339	transmembrane protein 160 [Source:HGNC Symbol;Acc:HGNC:26042]
ENSG00000168890	TMEM150A	0.0107647	transmembrane protein 150A [Source:HGNC Symbol;Acc:HGNC:24677]
ENSG00000159915	ZNF233	0.0107851	zinc finger protein 233 [Source:HGNC Symbol;Acc:HGNC:30946]
ENSG00000123384	LRP1	0.0107901	low density lipoprotein receptor-related protein 1 [Source:HGNC Symbol;Acc:HGNC:6692]
ENSG00000153294	GPR115	0.0108001	G protein-coupled receptor 115 [Source:HGNC Symbol;Acc:HGNC:19011]
ENSG00000212407	RNU6-663P	0.0108025	RNA, U6 small nuclear 663, pseudogene [Source:HGNC Symbol;Acc:HGNC:47626]
ENSG00000136720	HS6ST1	0.0108185	heparan sulfate 6-O-sulfotransferase 1 [Source:HGNC Symbol;Acc:HGNC:5201]
ENSG00000175611	LINC00476	0.0108366	long intergenic non-protein coding RNA 476 [Source:HGNC Symbol;Acc:HGNC:27858]
ENSG00000107669	ATE1	0.010838	arginyltransferase 1 [Source:HGNC Symbol;Acc:HGNC:782]
ENSG00000187658	C5orf52	0.010863	chromosome 5 open reading frame 52 [Source:HGNC Symbol;Acc:HGNC:35121]
ENSG00000239122	RNU2-11P	0.0108836	RNA, U2 small nuclear 11, pseudogene [Source:HGNC Symbol;Acc:HGNC:48504]
ENSG00000124164	VAPB	0.0108981	VAMP (vesicle-associated membrane protein)-associated protein B and C [Source:HGNC Symbol;Acc:HGNC:12649]
ENSG00000013288	MAN2B2	0.010926	mannosidase, alpha, class 2B, member 2 [Source:HGNC Symbol;Acc:HGNC:29623]
ENSG00000213652	HMGB3P30	0.0109558	high mobility group box 3 pseudogene 30 [Source:HGNC Symbol;Acc:HGNC:39333]
ENSG00000107859	PITX3	0.0109696	paired-like homeodomain 3 [Source:HGNC Symbol;Acc:HGNC:9006]
ENSG00000157350	ST3GAL2	0.0109725	ST3 beta-galactoside alpha-2,3-sialyltransferase 2 [Source:HGNC Symbol;Acc:HGNC:10863]
ENSG00000169213	RAB3B	0.0110195	RAB3B, member RAS oncogene family [Source:HGNC Symbol;Acc:HGNC:9778]
ENSG00000188643	S100A16	0.0110251	S100 calcium binding protein A16 [Source:HGNC Symbol;Acc:HGNC:20441]
ENSG00000128298	BAIAP2L2	0.0110278	BAI1-associated protein 2-like 2 [Source:HGNC Symbol;Acc:HGNC:26203]
ENSG00000197275	RAD54B	0.0110645	RAD54 homolog B (S. cerevisiae) [Source:HGNC Symbol;Acc:HGNC:17228]
ENSG00000155052	CNTNAP5	0.0110847	contactin associated protein-like 5 [Source:HGNC Symbol;Acc:HGNC:18748]
ENSG00000236191	RPS15AP25	0.0110992	ribosomal protein S15a pseudogene 25 [Source:HGNC Symbol;Acc:HGNC:36848]
ENSG00000196091	MYBPC1	0.0111017	myosin binding protein C, slow type [Source:HGNC Symbol;Acc:HGNC:7549]
ENSG00000221046	RNU6ATAC38P	0.0111078	RNA, U6atac small nuclear 38, pseudogene [Source:HGNC Symbol;Acc:HGNC:46937]
ENSG00000128294	TPST2	0.0111723	tyrosylprotein sulfotransferase 2 [Source:HGNC Symbol;Acc:HGNC:12021]
ENSG00000144824	PHLDB2	0.0112064	pleckstrin homology-like domain, family B, member 2 [Source:HGNC Symbol;Acc:HGNC:29573]
ENSG00000197586	ENTPD6	0.011224	ectonucleoside triphosphate diphosphohydrolase 6 (putative) [Source:HGNC Symbol;Acc:HGNC:3368]
ENSG00000137288	UQCC2	0.0112276	ubiquinol-cytochrome c reductase complex assembly factor 2 [Source:HGNC Symbol;Acc:HGNC:21237]
ENSG00000252045	NA	0.0112534	Small nucleolar RNA SNORA33 [Source:RFAM;Acc:RF00438]
ENSG00000185262	UBALD2	0.0112572	UBA-like domain containing 2 [Source:HGNC Symbol;Acc:HGNC:28438]
ENSG00000169914	OTUD3	0.011266	OTU deubiquitinase 3 [Source:HGNC Symbol;Acc:HGNC:29038]
ENSG00000125355	TMEM255A	0.0112769	transmembrane protein 255A [Source:HGNC Symbol;Acc:HGNC:26086]
ENSG00000204709	C6orf100	0.0112886	chromosome 6 open reading frame 100 [Source:HGNC Symbol;Acc:HGNC:21195]
ENSG00000207994	MIR100	0.0112995	microRNA 100 [Source:HGNC Symbol;Acc:HGNC:31487]
ENSG00000125999	BPIFB1	0.0113474	BPI fold containing family B, member 1 [Source:HGNC Symbol;Acc:HGNC:16108]
ENSG00000132382	MYBBP1A	0.0113551	MYB binding protein (P160) 1a [Source:HGNC Symbol;Acc:HGNC:7546]
ENSG00000059804	SLC2A3	0.0113587	solute carrier family 2 (facilitated glucose transporter), member 3 [Source:HGNC Symbol;Acc:HGNC:11007]
ENSG00000145390	USP53	0.0114059	ubiquitin specific peptidase 53 [Source:HGNC Symbol;Acc:HGNC:29255]
ENSG00000234226	NDUFS5P2	0.011408	NADH dehydrogenase (ubiquinone) Fe-S protein 5, 15kDa (NADH-coenzyme Q reductase) pseudogene 2 [Source:HGNC Symbol;Acc:HGNC:44040]
ENSG00000145386	CCNA2	0.0114122	cyclin A2 [Source:HGNC Symbol;Acc:HGNC:1578]
ENSG00000187783	TMEM72	0.0114193	transmembrane protein 72 [Source:HGNC Symbol;Acc:HGNC:31658]
ENSG00000252303	RNU6-1221P	0.0114445	RNA, U6 small nuclear 1221, pseudogene [Source:HGNC Symbol;Acc:HGNC:48184]
ENSG00000153266	FEZF2	0.0114537	FEZ family zinc finger 2 [Source:HGNC Symbol;Acc:HGNC:13506]
ENSG00000187902	SHISA7	0.0114556	shisa family member 7 [Source:HGNC Symbol;Acc:HGNC:35409]
ENSG00000105404	RABAC1	0.0114888	Rab acceptor 1 (prenylated) [Source:HGNC Symbol;Acc:HGNC:9794]
ENSG00000149923	PPP4C	0.0115058	protein phosphatase 4, catalytic subunit [Source:HGNC Symbol;Acc:HGNC:9319]
ENSG00000185053	SGCZ	0.0115325	sarcoglycan, zeta [Source:HGNC Symbol;Acc:HGNC:14075]
ENSG00000112893	MAN2A1	0.011557	mannosidase, alpha, class 2A, member 1 [Source:HGNC Symbol;Acc:HGNC:6824]
ENSG00000173557	C2orf70	0.0115588	chromosome 2 open reading frame 70 [Source:HGNC Symbol;Acc:HGNC:27938]
ENSG00000206181	TCEB3B	0.0115767	transcription elongation factor B polypeptide 3B (elongin A2) [Source:HGNC Symbol;Acc:HGNC:30771]
ENSG00000145020	AMT	0.0116019	aminomethyltransferase [Source:HGNC Symbol;Acc:HGNC:473]
ENSG00000272393	NA	0.0116283	U6 spliceosomal RNA [Source:RFAM;Acc:RF00026]
ENSG00000101057	MYBL2	0.0116616	v-myb avian myeloblastosis viral oncogene homolog-like 2 [Source:HGNC Symbol;Acc:HGNC:7548]
ENSG00000128245	YWHAH	0.0116618	tyrosine 3-monooxygenase/tryptophan 5-monooxygenase activation protein, eta [Source:HGNC Symbol;Acc:HGNC:12853]
ENSG00000105664	COMP	0.0116788	cartilage oligomeric matrix protein [Source:HGNC Symbol;Acc:HGNC:2227]
ENSG00000127527	EPS15L1	0.0116825	epidermal growth factor receptor pathway substrate 15-like 1 [Source:HGNC Symbol;Acc:HGNC:24634]
ENSG00000171962	LRRC48	0.0117164	leucine rich repeat containing 48 [Source:HGNC Symbol;Acc:HGNC:25384]
ENSG00000169903	TM4SF4	0.011718	transmembrane 4 L six family member 4 [Source:HGNC Symbol;Acc:HGNC:11856]
ENSG00000241757	RN7SL714P	0.0117418	RNA, 7SL, cytoplasmic 714, pseudogene [Source:HGNC Symbol;Acc:HGNC:46730]
ENSG00000151065	DCP1B	0.0117666	decapping mRNA 1B [Source:HGNC Symbol;Acc:HGNC:24451]
ENSG00000176998	HCG4	0.0117994	HLA complex group 4 (non-protein coding) [Source:HGNC Symbol;Acc:HGNC:21241]
ENSG00000163702	IL17RC	0.0118269	interleukin 17 receptor C [Source:HGNC Symbol;Acc:HGNC:18358]
ENSG00000172346	CSDC2	0.0118338	cold shock domain containing C2, RNA binding [Source:HGNC Symbol;Acc:HGNC:30359]
ENSG00000138134	STAMBPL1	0.0118968	STAM binding protein-like 1 [Source:HGNC Symbol;Acc:HGNC:24105]
ENSG00000112473	SLC39A7	0.0118991	solute carrier family 39 (zinc transporter), member 7 [Source:HGNC Symbol;Acc:HGNC:4927]
ENSG00000148377	IDI2	0.0119059	isopentenyl-diphosphate delta isomerase 2 [Source:HGNC Symbol;Acc:HGNC:23487]
ENSG00000008405	CRY1	0.0119114	cryptochrome circadian clock 1 [Source:HGNC Symbol;Acc:HGNC:2384]
ENSG00000165617	DACT1	0.011931	dishevelled-binding antagonist of beta-catenin 1 [Source:HGNC Symbol;Acc:HGNC:17748]
ENSG00000108961	RANGRF	0.0119809	RAN guanine nucleotide release factor [Source:HGNC Symbol;Acc:HGNC:17679]
ENSG00000240545	RN7SL492P	0.0119823	RNA, 7SL, cytoplasmic 492, pseudogene [Source:HGNC Symbol;Acc:HGNC:46508]
ENSG00000004660	CAMKK1	0.0119871	calcium/calmodulin-dependent protein kinase kinase 1, alpha [Source:HGNC Symbol;Acc:HGNC:1469]
ENSG00000117143	UAP1	0.0119942	UDP-N-acetylglucosamine pyrophosphorylase 1 [Source:HGNC Symbol;Acc:HGNC:12457]
ENSG00000092964	DPYSL2	0.0119968	dihydropyrimidinase-like 2 [Source:HGNC Symbol;Acc:HGNC:3014]
ENSG00000236965	OR52N3P	0.012014	olfactory receptor, family 52, subfamily N, member 3 pseudogene [Source:HGNC Symbol;Acc:HGNC:15229]
ENSG00000113749	HRH2	0.0120182	histamine receptor H2 [Source:HGNC Symbol;Acc:HGNC:5183]
ENSG00000212336	RNA5SP210	0.012019	RNA, 5S ribosomal pseudogene 210 [Source:HGNC Symbol;Acc:HGNC:43110]
ENSG00000146122	DAAM2	0.0120328	dishevelled associated activator of morphogenesis 2 [Source:HGNC Symbol;Acc:HGNC:18143]
ENSG00000104899	AMH	0.0120765	anti-Mullerian hormone [Source:HGNC Symbol;Acc:HGNC:464]
ENSG00000184055	OR7E87P	0.0120767	olfactory receptor, family 7, subfamily E, member 87 pseudogene [Source:HGNC Symbol;Acc:HGNC:14709]
ENSG00000173917	HOXB2	0.012079	homeobox B2 [Source:HGNC Symbol;Acc:HGNC:5113]
ENSG00000143801	PSEN2	0.0120997	presenilin 2 [Source:HGNC Symbol;Acc:HGNC:9509]
ENSG00000123728	RAP2C	0.0121369	RAP2C, member of RAS oncogene family [Source:HGNC Symbol;Acc:HGNC:21165]
ENSG00000198261	OR5BB1P	0.0121442	olfactory receptor, family 5, subfamily BB, member 1 pseudogene [Source:HGNC Symbol;Acc:HGNC:15271]
ENSG00000163521	GLB1L	0.0121588	galactosidase, beta 1-like [Source:HGNC Symbol;Acc:HGNC:28129]
ENSG00000100379	KCTD17	0.0121605	potassium channel tetramerization domain containing 17 [Source:HGNC Symbol;Acc:HGNC:25705]
ENSG00000196584	XRCC2	0.0121674	X-ray repair complementing defective repair in Chinese hamster cells 2 [Source:HGNC Symbol;Acc:HGNC:12829]
ENSG00000187005	KRTAP21-1	0.0121854	keratin associated protein 21-1 [Source:HGNC Symbol;Acc:HGNC:18945]
ENSG00000242855	RN7SL496P	0.0122356	RNA, 7SL, cytoplasmic 496, pseudogene [Source:HGNC Symbol;Acc:HGNC:46512]
ENSG00000181472	ZBTB2	0.0122399	zinc finger and BTB domain containing 2 [Source:HGNC Symbol;Acc:HGNC:20868]
ENSG00000150394	CDH8	0.0122431	cadherin 8, type 2 [Source:HGNC Symbol;Acc:HGNC:1767]
ENSG00000174996	KLC2	0.0122607	kinesin light chain 2 [Source:HGNC Symbol;Acc:HGNC:20716]
ENSG00000130600	H19	0.0122756	H19, imprinted maternally expressed transcript (non-protein coding) [Source:HGNC Symbol;Acc:HGNC:4713]
ENSG00000223258	RNU6-575P	0.0123238	RNA, U6 small nuclear 575, pseudogene [Source:HGNC Symbol;Acc:HGNC:47538]
ENSG00000162946	DISC1	0.0123325	disrupted in schizophrenia 1 [Source:HGNC Symbol;Acc:HGNC:2888]
ENSG00000198975	MIRLET7A2	0.0123571	microRNA let-7a-2 [Source:HGNC Symbol;Acc:HGNC:31477]
ENSG00000123595	RAB9A	0.0123737	RAB9A, member RAS oncogene family [Source:HGNC Symbol;Acc:HGNC:9792]
ENSG00000207215	NA	0.012395	Small nucleolar RNA U3 [Source:RFAM;Acc:RF00012]
ENSG00000116183	PAPPA2	0.0124048	pappalysin 2 [Source:HGNC Symbol;Acc:HGNC:14615]
ENSG00000236683	HMGA1P1	0.0124135	high mobility group AT-hook 1 pseudogene 1 [Source:HGNC Symbol;Acc:HGNC:13321]
ENSG00000116852	KIF21B	0.0124178	kinesin family member 21B [Source:HGNC Symbol;Acc:HGNC:29442]
ENSG00000121853	GHSR	0.0124347	growth hormone secretagogue receptor [Source:HGNC Symbol;Acc:HGNC:4267]
ENSG00000238371	NA	0.012455	Small nucleolar RNA U13 [Source:RFAM;Acc:RF01210]
ENSG00000198756	COLGALT2	0.0124624	collagen beta(1-O)galactosyltransferase 2 [Source:HGNC Symbol;Acc:HGNC:16790]
ENSG00000222644	RNU2-16P	0.0124749	RNA, U2 small nuclear 16, pseudogene [Source:HGNC Symbol;Acc:HGNC:48509]
ENSG00000170477	KRT4	0.0124805	keratin 4 [Source:HGNC Symbol;Acc:HGNC:6441]
ENSG00000005108	THSD7A	0.0124952	thrombospondin, type I, domain containing 7A [Source:HGNC Symbol;Acc:HGNC:22207]
ENSG00000166111	SVOP	0.0125089	SV2 related protein homolog (rat) [Source:HGNC Symbol;Acc:HGNC:25417]
ENSG00000207220	RNU1-57P	0.012526	RNA, U1 small nuclear 57, pseudogene [Source:HGNC Symbol;Acc:HGNC:48399]
ENSG00000145506	NKD2	0.0125873	naked cuticle homolog 2 (Drosophila) [Source:HGNC Symbol;Acc:HGNC:17046]
ENSG00000134389	CFHR5	0.0126319	complement factor H-related 5 [Source:HGNC Symbol;Acc:HGNC:24668]
ENSG00000240771	ARHGEF25	0.0127016	Rho guanine nucleotide exchange factor (GEF) 25 [Source:HGNC Symbol;Acc:HGNC:30275]
ENSG00000233270	SNRPEP4	0.0127121	small nuclear ribonucleoprotein polypeptide E pseudogene 4 [Source:HGNC Symbol;Acc:HGNC:43446]
ENSG00000197261	C6orf141	0.0127169	chromosome 6 open reading frame 141 [Source:HGNC Symbol;Acc:HGNC:21351]
ENSG00000111364	DDX55	0.0127193	DEAD (Asp-Glu-Ala-Asp) box polypeptide 55 [Source:HGNC Symbol;Acc:HGNC:20085]
ENSG00000207339	RNU1-69P	0.0127472	RNA, U1 small nuclear 69, pseudogene [Source:HGNC Symbol;Acc:HGNC:48411]
ENSG00000114904	NEK4	0.0127683	NIMA-related kinase 4 [Source:HGNC Symbol;Acc:HGNC:11399]
ENSG00000102891	MT4	0.0128179	metallothionein 4 [Source:HGNC Symbol;Acc:HGNC:18705]
ENSG00000135472	FAIM2	0.0128368	Fas apoptotic inhibitory molecule 2 [Source:HGNC Symbol;Acc:HGNC:17067]
ENSG00000214548	MEG3	0.0128445	maternally expressed 3 (non-protein coding) [Source:HGNC Symbol;Acc:HGNC:14575]
ENSG00000168646	AXIN2	0.0128448	axin 2 [Source:HGNC Symbol;Acc:HGNC:904]
ENSG00000104313	EYA1	0.012856	EYA transcriptional coactivator and phosphatase 1 [Source:HGNC Symbol;Acc:HGNC:3519]
ENSG00000168530	MYL1	0.012861	myosin, light chain 1, alkali; skeletal, fast [Source:HGNC Symbol;Acc:HGNC:7582]
ENSG00000130725	UBE2M	0.0128611	ubiquitin-conjugating enzyme E2M [Source:HGNC Symbol;Acc:HGNC:12491]
ENSG00000151208	DLG5	0.0128618	discs, large homolog 5 (Drosophila) [Source:HGNC Symbol;Acc:HGNC:2904]
ENSG00000145949	MYLK4	0.0128912	myosin light chain kinase family, member 4 [Source:HGNC Symbol;Acc:HGNC:27972]
ENSG00000201314	NA	0.0130021	Y RNA [Source:RFAM;Acc:RF00019]
ENSG00000206835	RNU1-74P	0.0130128	RNA, U1 small nuclear 74, pseudogene [Source:HGNC Symbol;Acc:HGNC:48416]
ENSG00000023734	STRAP	0.0130551	serine/threonine kinase receptor associated protein [Source:HGNC Symbol;Acc:HGNC:30796]
ENSG00000133606	MKRN1	0.0131098	makorin ring finger protein 1 [Source:HGNC Symbol;Acc:HGNC:7112]
ENSG00000184986	TMEM121	0.0131506	transmembrane protein 121 [Source:HGNC Symbol;Acc:HGNC:20511]
ENSG00000122194	PLG	0.0131639	plasminogen [Source:HGNC Symbol;Acc:HGNC:9071]
ENSG00000013619	MAMLD1	0.0132126	mastermind-like domain containing 1 [Source:HGNC Symbol;Acc:HGNC:2568]
ENSG00000140853	NLRC5	0.013256	NLR family, CARD domain containing 5 [Source:HGNC Symbol;Acc:HGNC:29933]
ENSG00000240299	RN7SL187P	0.0132741	RNA, 7SL, cytoplasmic 187, pseudogene [Source:HGNC Symbol;Acc:HGNC:46203]
ENSG00000120440	TTLL2	0.0132775	tubulin tyrosine ligase-like family, member 2 [Source:HGNC Symbol;Acc:HGNC:21211]
ENSG00000147231	CXorf57	0.0133062	chromosome X open reading frame 57 [Source:HGNC Symbol;Acc:HGNC:25486]
ENSG00000127337	YEATS4	0.0133077	YEATS domain containing 4 [Source:HGNC Symbol;Acc:HGNC:24859]
ENSG00000108788	MLX	0.0133414	MLX, MAX dimerization protein [Source:HGNC Symbol;Acc:HGNC:11645]
ENSG00000120256	LRP11	0.0133554	low density lipoprotein receptor-related protein 11 [Source:HGNC Symbol;Acc:HGNC:16936]
ENSG00000131386	GALNT15	0.0133701	polypeptide N-acetylgalactosaminyltransferase 15 [Source:HGNC Symbol;Acc:HGNC:21531]
ENSG00000196273	LINC00523	0.0133783	long intergenic non-protein coding RNA 523 [Source:HGNC Symbol;Acc:HGNC:20117]
ENSG00000132517	SLC52A1	0.013445	solute carrier family 52 (riboflavin transporter), member 1 [Source:HGNC Symbol;Acc:HGNC:30225]
ENSG00000204365	C10orf126	0.0134524	chromosome 10 open reading frame 126 [Source:HGNC Symbol;Acc:HGNC:28693]
ENSG00000198523	PLN	0.0134584	phospholamban [Source:HGNC Symbol;Acc:HGNC:9080]
ENSG00000222640	RNU2-51P	0.0134802	RNA, U2 small nuclear 51, pseudogene [Source:HGNC Symbol;Acc:HGNC:48544]
ENSG00000254521	SIGLEC12	0.0134898	sialic acid binding Ig-like lectin 12 (gene/pseudogene) [Source:HGNC Symbol;Acc:HGNC:15482]
ENSG00000244222	OR7E121P	0.0135103	olfactory receptor, family 7, subfamily E, member 121 pseudogene [Source:HGNC Symbol;Acc:HGNC:15049]
ENSG00000138646	HERC5	0.013528	HECT and RLD domain containing E3 ubiquitin protein ligase 5 [Source:HGNC Symbol;Acc:HGNC:24368]
ENSG00000166147	FBN1	0.0135365	fibrillin 1 [Source:HGNC Symbol;Acc:HGNC:3603]
ENSG00000122585	NPY	0.013563	neuropeptide Y [Source:HGNC Symbol;Acc:HGNC:7955]
ENSG00000179918	SEPHS2	0.013577	selenophosphate synthetase 2 [Source:HGNC Symbol;Acc:HGNC:19686]
ENSG00000090615	GOLGA3	0.0135917	golgin A3 [Source:HGNC Symbol;Acc:HGNC:4426]
ENSG00000183395	PMCH	0.0136447	pro-melanin-concentrating hormone [Source:HGNC Symbol;Acc:HGNC:9109]
ENSG00000115421	PAPOLG	0.0136472	poly(A) polymerase gamma [Source:HGNC Symbol;Acc:HGNC:14982]
ENSG00000050438	SLC4A8	0.0137141	solute carrier family 4, sodium bicarbonate cotransporter, member 8 [Source:HGNC Symbol;Acc:HGNC:11034]
ENSG00000153814	JAZF1	0.0137203	JAZF zinc finger 1 [Source:HGNC Symbol;Acc:HGNC:28917]
ENSG00000137166	FOXP4	0.0137566	forkhead box P4 [Source:HGNC Symbol;Acc:HGNC:20842]
ENSG00000007968	E2F2	0.0137764	E2F transcription factor 2 [Source:HGNC Symbol;Acc:HGNC:3114]
ENSG00000132855	ANGPTL3	0.0137772	angiopoietin-like 3 [Source:HGNC Symbol;Acc:HGNC:491]
ENSG00000111057	KRT18	0.0137994	keratin 18 [Source:HGNC Symbol;Acc:HGNC:6430]
ENSG00000178980	SEPW1	0.0138034	selenoprotein W, 1 [Source:HGNC Symbol;Acc:HGNC:10752]
ENSG00000199224	NA	0.0138151	Y RNA [Source:RFAM;Acc:RF00019]
ENSG00000138162	TACC2	0.01383	transforming, acidic coiled-coil containing protein 2 [Source:HGNC Symbol;Acc:HGNC:11523]
ENSG00000175073	VCPIP1	0.0138413	valosin containing protein (p97)/p47 complex interacting protein 1 [Source:HGNC Symbol;Acc:HGNC:30897]
ENSG00000164638	SLC29A4	0.0138643	solute carrier family 29 (equilibrative nucleoside transporter), member 4 [Source:HGNC Symbol;Acc:HGNC:23097]
ENSG00000177432	NAP1L5	0.0138786	nucleosome assembly protein 1-like 5 [Source:HGNC Symbol;Acc:HGNC:19968]
ENSG00000004975	DVL2	0.0138874	dishevelled segment polarity protein 2 [Source:HGNC Symbol;Acc:HGNC:3086]
ENSG00000023572	GLRX2	0.0139313	glutaredoxin 2 [Source:HGNC Symbol;Acc:HGNC:16065]
ENSG00000100280	AP1B1	0.0139971	adaptor-related protein complex 1, beta 1 subunit [Source:HGNC Symbol;Acc:HGNC:554]
ENSG00000169474	SPRR1A	0.014079	small proline-rich protein 1A [Source:HGNC Symbol;Acc:HGNC:11259]
ENSG00000101670	LIPG	0.0140929	lipase, endothelial [Source:HGNC Symbol;Acc:HGNC:6623]
ENSG00000201786	NA	0.0140961	Y RNA [Source:RFAM;Acc:RF00019]
ENSG00000212580	NA	0.0141742	Small nucleolar RNA SNORA75 [Source:RFAM;Acc:RF00072]
ENSG00000164077	MON1A	0.0142034	MON1 secretory trafficking family member A [Source:HGNC Symbol;Acc:HGNC:28207]
ENSG00000162613	FUBP1	0.0142507	far upstream element (FUSE) binding protein 1 [Source:HGNC Symbol;Acc:HGNC:4004]
ENSG00000144485	HES6	0.0142941	hes family bHLH transcription factor 6 [Source:HGNC Symbol;Acc:HGNC:18254]
ENSG00000257987	LINC00935	0.0143143	long intergenic non-protein coding RNA 935 [Source:HGNC Symbol;Acc:HGNC:48628]
ENSG00000167244	IGF2	0.0143333	insulin-like growth factor 2 (somatomedin A) [Source:HGNC Symbol;Acc:HGNC:5466]
ENSG00000084090	STARD7	0.0143342	StAR-related lipid transfer (START) domain containing 7 [Source:HGNC Symbol;Acc:HGNC:18063]
ENSG00000126217	MCF2L	0.014344	MCF.2 cell line derived transforming sequence-like [Source:HGNC Symbol;Acc:HGNC:14576]
ENSG00000169252	ADRB2	0.0143698	adrenoceptor beta 2, surface [Source:HGNC Symbol;Acc:HGNC:286]
ENSG00000176896	TCEANC	0.0143722	transcription elongation factor A (SII) N-terminal and central domain containing [Source:HGNC Symbol;Acc:HGNC:28277]
ENSG00000229204	PTGES3P3	0.014419	prostaglandin E synthase 3 (cytosolic) pseudogene 3 [Source:HGNC Symbol;Acc:HGNC:43823]
ENSG00000100299	ARSA	0.0144364	arylsulfatase A [Source:HGNC Symbol;Acc:HGNC:713]
ENSG00000109113	RAB34	0.0144756	RAB34, member RAS oncogene family [Source:HGNC Symbol;Acc:HGNC:16519]
ENSG00000125952	MAX	0.0145318	MYC associated factor X [Source:HGNC Symbol;Acc:HGNC:6913]
ENSG00000166573	GALR1	0.0145653	galanin receptor 1 [Source:HGNC Symbol;Acc:HGNC:4132]
ENSG00000165716	FAM69B	0.0145987	family with sequence similarity 69, member B [Source:HGNC Symbol;Acc:HGNC:28290]
ENSG00000207172	RNU6-1162P	0.0146099	RNA, U6 small nuclear 1162, pseudogene [Source:HGNC Symbol;Acc:HGNC:48125]
ENSG00000199326	RNU6-1298P	0.0146981	RNA, U6 small nuclear 1298, pseudogene [Source:HGNC Symbol;Acc:HGNC:48261]
ENSG00000172752	COL6A5	0.0147149	collagen, type VI, alpha 5 [Source:HGNC Symbol;Acc:HGNC:26674]
ENSG00000120093	HOXB3	0.014736	homeobox B3 [Source:HGNC Symbol;Acc:HGNC:5114]
ENSG00000227737	OR8B1P	0.0147544	olfactory receptor, family 8, subfamily B, member 1 pseudogene [Source:HGNC Symbol;Acc:HGNC:8470]
ENSG00000225968	ELFN1	0.0147603	extracellular leucine-rich repeat and fibronectin type III domain containing 1 [Source:HGNC Symbol;Acc:HGNC:33154]
ENSG00000033030	ZCCHC8	0.0147642	zinc finger, CCHC domain containing 8 [Source:HGNC Symbol;Acc:HGNC:25265]
ENSG00000125651	GTF2F1	0.0147851	general transcription factor IIF, polypeptide 1, 74kDa [Source:HGNC Symbol;Acc:HGNC:4652]
ENSG00000136295	TTYH3	0.0147858	tweety family member 3 [Source:HGNC Symbol;Acc:HGNC:22222]
ENSG00000257331	RACGAP1P	0.0147905	Rac GTPase activating protein 1 pseudogene [Source:HGNC Symbol;Acc:HGNC:24689]
ENSG00000207492	RNU6-713P	0.0148073	RNA, U6 small nuclear 713, pseudogene [Source:HGNC Symbol;Acc:HGNC:47676]
ENSG00000159556	ISL2	0.0148268	ISL LIM homeobox 2 [Source:HGNC Symbol;Acc:HGNC:18524]
ENSG00000166821	PEX11A	0.0148319	peroxisomal biogenesis factor 11 alpha [Source:HGNC Symbol;Acc:HGNC:8852]
ENSG00000186925	KRTAP19-6	0.0148641	keratin associated protein 19-6 [Source:HGNC Symbol;Acc:HGNC:18941]
ENSG00000108829	LRRC59	0.0148867	leucine rich repeat containing 59 [Source:HGNC Symbol;Acc:HGNC:28817]
ENSG00000116580	GON4L	0.0148872	gon-4-like (C. elegans) [Source:HGNC Symbol;Acc:HGNC:25973]
ENSG00000137710	RDX	0.0149299	radixin [Source:HGNC Symbol;Acc:HGNC:9944]
ENSG00000272412	NA	0.0149353	Metazoan signal recognition particle RNA [Source:RFAM;Acc:RF00017]
ENSG00000150722	PPP1R1C	0.014947	protein phosphatase 1, regulatory (inhibitor) subunit 1C [Source:HGNC Symbol;Acc:HGNC:14940]
ENSG00000199488	RNU1-70P	0.0149471	RNA, U1 small nuclear 70, pseudogene [Source:HGNC Symbol;Acc:HGNC:48412]
ENSG00000062282	DGAT2	0.014948	diacylglycerol O-acyltransferase 2 [Source:HGNC Symbol;Acc:HGNC:16940]
ENSG00000145284	SCD5	0.0149577	stearoyl-CoA desaturase 5 [Source:HGNC Symbol;Acc:HGNC:21088]
ENSG00000129538	RNASE1	0.0149639	ribonuclease, RNase A family, 1 (pancreatic) [Source:HGNC Symbol;Acc:HGNC:10044]
ENSG00000267278	MAP3K14-AS1	0.0149829	MAP3K14 antisense RNA 1 [Source:HGNC Symbol;Acc:HGNC:44359]
ENSG00000008311	AASS	0.0150242	aminoadipate-semialdehyde synthase [Source:HGNC Symbol;Acc:HGNC:17366]
ENSG00000253563	NKX2-1-AS1	0.0150641	NKX2-1 antisense RNA 1 [Source:HGNC Symbol;Acc:HGNC:40585]
ENSG00000132481	TRIM47	0.0150966	tripartite motif containing 47 [Source:HGNC Symbol;Acc:HGNC:19020]
ENSG00000198939	ZFP2	0.0151785	ZFP2 zinc finger protein [Source:HGNC Symbol;Acc:HGNC:26138]
ENSG00000136451	VEZF1	0.015185	vascular endothelial zinc finger 1 [Source:HGNC Symbol;Acc:HGNC:12949]
ENSG00000121058	COIL	0.0152147	coilin [Source:HGNC Symbol;Acc:HGNC:2184]
ENSG00000058799	YIPF1	0.0152466	Yip1 domain family, member 1 [Source:HGNC Symbol;Acc:HGNC:25231]
ENSG00000201642	RNU6-865P	0.0152911	RNA, U6 small nuclear 865, pseudogene [Source:HGNC Symbol;Acc:HGNC:47828]
ENSG00000215559	ANKRD20A11P	0.015308	ankyrin repeat domain 20 family, member A11, pseudogene [Source:HGNC Symbol;Acc:HGNC:42024]
ENSG00000201672	SNORD113-4	0.0153359	small nucleolar RNA, C/D box 113-4 [Source:HGNC Symbol;Acc:HGNC:32983]
ENSG00000242989	RN7SL332P	0.0153718	RNA, 7SL, cytoplasmic 332, pseudogene [Source:HGNC Symbol;Acc:HGNC:46348]
ENSG00000132635	PCED1A	0.0154114	PC-esterase domain containing 1A [Source:HGNC Symbol;Acc:HGNC:16212]
ENSG00000176383	B3GNT4	0.015416	UDP-GlcNAc:betaGal beta-1,3-N-acetylglucosaminyltransferase 4 [Source:HGNC Symbol;Acc:HGNC:15683]
ENSG00000163029	SMC6	0.0154427	structural maintenance of chromosomes 6 [Source:HGNC Symbol;Acc:HGNC:20466]
ENSG00000200325	NA	0.0154497	Y RNA [Source:RFAM;Acc:RF00019]
ENSG00000170606	HSPA4	0.0154627	heat shock 70kDa protein 4 [Source:HGNC Symbol;Acc:HGNC:5237]
ENSG00000168765	GSTM4	0.0155351	glutathione S-transferase mu 4 [Source:HGNC Symbol;Acc:HGNC:4636]
ENSG00000084463	WBP11	0.0155461	WW domain binding protein 11 [Source:HGNC Symbol;Acc:HGNC:16461]
ENSG00000201392	RNU6-1078P	0.0155733	RNA, U6 small nuclear 1078, pseudogene [Source:HGNC Symbol;Acc:HGNC:48041]
ENSG00000104327	CALB1	0.0155849	calbindin 1, 28kDa [Source:HGNC Symbol;Acc:HGNC:1434]
ENSG00000187021	PNLIPRP1	0.015585	pancreatic lipase-related protein 1 [Source:HGNC Symbol;Acc:HGNC:9156]
ENSG00000201584	NA	0.0155983	Y RNA [Source:RFAM;Acc:RF00019]
ENSG00000166448	TMEM130	0.0156231	transmembrane protein 130 [Source:HGNC Symbol;Acc:HGNC:25429]
ENSG00000132874	SLC14A2	0.0156247	solute carrier family 14 (urea transporter), member 2 [Source:HGNC Symbol;Acc:HGNC:10919]
ENSG00000145879	SPINK7	0.0156275	serine peptidase inhibitor, Kazal type 7 (putative) [Source:HGNC Symbol;Acc:HGNC:24643]
ENSG00000135272	MDFIC	0.0156509	MyoD family inhibitor domain containing [Source:HGNC Symbol;Acc:HGNC:28870]
ENSG00000168679	SLC16A4	0.0156534	solute carrier family 16, member 4 [Source:HGNC Symbol;Acc:HGNC:10925]
ENSG00000206947	NA	0.0156553	Small nucleolar RNA SNORA20 [Source:RFAM;Acc:RF00401]
ENSG00000162873	KLHDC8A	0.0156994	kelch domain containing 8A [Source:HGNC Symbol;Acc:HGNC:25573]
ENSG00000105251	SHD	0.0157027	Src homology 2 domain containing transforming protein D [Source:HGNC Symbol;Acc:HGNC:30633]
ENSG00000005206	SPPL2B	0.0158045	signal peptide peptidase like 2B [Source:HGNC Symbol;Acc:HGNC:30627]
ENSG00000170396	ZNF804A	0.0158056	zinc finger protein 804A [Source:HGNC Symbol;Acc:HGNC:21711]
ENSG00000105186	ANKRD27	0.0158077	ankyrin repeat domain 27 (VPS9 domain) [Source:HGNC Symbol;Acc:HGNC:25310]
ENSG00000121089	NACA3P	0.0158235	NACA family member 3 pseudogene [Source:HGNC Symbol;Acc:HGNC:33442]
ENSG00000175063	UBE2C	0.0158506	ubiquitin-conjugating enzyme E2C [Source:HGNC Symbol;Acc:HGNC:15937]
ENSG00000196335	STK31	0.0158552	serine/threonine kinase 31 [Source:HGNC Symbol;Acc:HGNC:11407]
ENSG00000128408	RIBC2	0.0158662	RIB43A domain with coiled-coils 2 [Source:HGNC Symbol;Acc:HGNC:13241]
ENSG00000165275	TRMT10B	0.015882	tRNA methyltransferase 10 homolog B (S. cerevisiae) [Source:HGNC Symbol;Acc:HGNC:26454]
ENSG00000143815	LBR	0.0159039	lamin B receptor [Source:HGNC Symbol;Acc:HGNC:6518]
ENSG00000111206	FOXM1	0.0159148	forkhead box M1 [Source:HGNC Symbol;Acc:HGNC:3818]
ENSG00000132429	POPDC3	0.0159781	popeye domain containing 3 [Source:HGNC Symbol;Acc:HGNC:17649]
ENSG00000159164	SV2A	0.0160635	synaptic vesicle glycoprotein 2A [Source:HGNC Symbol;Acc:HGNC:20566]
ENSG00000265203	RBP3	0.0160698	retinol binding protein 3, interstitial [Source:HGNC Symbol;Acc:HGNC:9921]
ENSG00000197951	ZNF71	0.0161071	zinc finger protein 71 [Source:HGNC Symbol;Acc:HGNC:13141]
ENSG00000199245	NA	0.0161114	Y RNA [Source:RFAM;Acc:RF00019]
ENSG00000242520	MAGEA5	0.0161184	melanoma antigen family A, 5 [Source:HGNC Symbol;Acc:HGNC:6803]
ENSG00000198265	HELZ	0.0161294	helicase with zinc finger [Source:HGNC Symbol;Acc:HGNC:16878]
ENSG00000146521	C6orf123	0.0161626	chromosome 6 open reading frame 123 [Source:HGNC Symbol;Acc:HGNC:21235]
ENSG00000068097	HEATR6	0.0161665	HEAT repeat containing 6 [Source:HGNC Symbol;Acc:HGNC:24076]
ENSG00000122543	OCM	0.0161766	oncomodulin [Source:HGNC Symbol;Acc:HGNC:8105]
ENSG00000165269	AQP7	0.0162448	aquaporin 7 [Source:HGNC Symbol;Acc:HGNC:640]
ENSG00000157064	NMNAT2	0.0162931	nicotinamide nucleotide adenylyltransferase 2 [Source:HGNC Symbol;Acc:HGNC:16789]
ENSG00000163694	RBM47	0.0163391	RNA binding motif protein 47 [Source:HGNC Symbol;Acc:HGNC:30358]
ENSG00000171777	RASGRP4	0.0163436	RAS guanyl releasing protein 4 [Source:HGNC Symbol;Acc:HGNC:18958]
ENSG00000144857	BOC	0.0163752	BOC cell adhesion associated, oncogene regulated [Source:HGNC Symbol;Acc:HGNC:17173]
ENSG00000213859	KCTD11	0.0164013	potassium channel tetramerization domain containing 11 [Source:HGNC Symbol;Acc:HGNC:21302]
ENSG00000105063	PPP6R1	0.0164496	protein phosphatase 6, regulatory subunit 1 [Source:HGNC Symbol;Acc:HGNC:29195]
ENSG00000222305	NA	0.0164969	Y RNA [Source:RFAM;Acc:RF00019]
ENSG00000100426	ZBED4	0.0164977	zinc finger, BED-type containing 4 [Source:HGNC Symbol;Acc:HGNC:20721]
ENSG00000075702	WDR62	0.0165082	WD repeat domain 62 [Source:HGNC Symbol;Acc:HGNC:24502]
ENSG00000163348	PYGO2	0.0165177	pygopus family PHD finger 2 [Source:HGNC Symbol;Acc:HGNC:30257]
ENSG00000212565	NA	0.0165915	Small nucleolar RNA SNORA68 [Source:RFAM;Acc:RF00263]
ENSG00000168589	DYNLRB2	0.0165918	dynein, light chain, roadblock-type 2 [Source:HGNC Symbol;Acc:HGNC:15467]
ENSG00000174775	HRAS	0.0165972	Harvey rat sarcoma viral oncogene homolog [Source:HGNC Symbol;Acc:HGNC:5173]
ENSG00000170385	SLC30A1	0.0166088	solute carrier family 30 (zinc transporter), member 1 [Source:HGNC Symbol;Acc:HGNC:11012]
ENSG00000165264	NDUFB6	0.0166347	NADH dehydrogenase (ubiquinone) 1 beta subcomplex, 6, 17kDa [Source:HGNC Symbol;Acc:HGNC:7701]
ENSG00000083828	ZNF586	0.0166664	zinc finger protein 586 [Source:HGNC Symbol;Acc:HGNC:25949]
ENSG00000133863	TEX15	0.0166716	testis expressed 15 [Source:HGNC Symbol;Acc:HGNC:11738]
ENSG00000007341	ST7L	0.0166846	suppression of tumorigenicity 7 like [Source:HGNC Symbol;Acc:HGNC:18441]
ENSG00000116337	AMPD2	0.0166961	adenosine monophosphate deaminase 2 [Source:HGNC Symbol;Acc:HGNC:469]
ENSG00000203797	DDO	0.0167148	D-aspartate oxidase [Source:HGNC Symbol;Acc:HGNC:2727]
ENSG00000164120	HPGD	0.0167169	hydroxyprostaglandin dehydrogenase 15-(NAD) [Source:HGNC Symbol;Acc:HGNC:5154]
ENSG00000279468	NA	0.0167388	HCG1787699; Uncharacterized protein [Source:UniProtKB/TrEMBL;Acc:M0R3D0]
ENSG00000207252	NA	0.016776	Y RNA [Source:RFAM;Acc:RF00019]
ENSG00000205444	NA	0.0168058	uncharacterized LOC497048 [Source:EntrezGene;Acc:497048]
ENSG00000151718	WWC2	0.0168403	WW and C2 domain containing 2 [Source:HGNC Symbol;Acc:HGNC:24148]
ENSG00000156398	SFXN2	0.0168456	sideroflexin 2 [Source:HGNC Symbol;Acc:HGNC:16086]
ENSG00000106804	C5	0.0168598	complement component 5 [Source:HGNC Symbol;Acc:HGNC:1331]
ENSG00000272051	NA	0.0168702	Y RNA [Source:RFAM;Acc:RF00019]
ENSG00000115318	LOXL3	0.0168939	lysyl oxidase-like 3 [Source:HGNC Symbol;Acc:HGNC:13869]
ENSG00000181458	TMEM45A	0.0169042	transmembrane protein 45A [Source:HGNC Symbol;Acc:HGNC:25480]
ENSG00000252898	RNU6-1096P	0.0169618	RNA, U6 small nuclear 1096, pseudogene [Source:HGNC Symbol;Acc:HGNC:48059]
ENSG00000157017	GHRL	0.0169973	ghrelin/obestatin prepropeptide [Source:HGNC Symbol;Acc:HGNC:18129]
ENSG00000138074	SLC5A6	0.01702	solute carrier family 5 (sodium/multivitamin and iodide cotransporter), member 6 [Source:HGNC Symbol;Acc:HGNC:11041]
ENSG00000175841	FAM172BP	0.0170326	family with sequence similarity 172, member B, pseudogene [Source:HGNC Symbol;Acc:HGNC:34336]
ENSG00000143457	GOLPH3L	0.0170522	golgi phosphoprotein 3-like [Source:HGNC Symbol;Acc:HGNC:24882]
ENSG00000256043	CTSO	0.0170997	cathepsin O [Source:HGNC Symbol;Acc:HGNC:2542]
ENSG00000171217	CLDN20	0.0171151	claudin 20 [Source:HGNC Symbol;Acc:HGNC:2042]
ENSG00000207325	RNY1P4	0.0171441	RNA, Ro-associated Y1 pseudogene 4 [Source:HGNC Symbol;Acc:HGNC:42481]
ENSG00000161547	SRSF2	0.0171481	serine/arginine-rich splicing factor 2 [Source:HGNC Symbol;Acc:HGNC:10783]
ENSG00000176946	THAP4	0.0171704	THAP domain containing 4 [Source:HGNC Symbol;Acc:HGNC:23187]
ENSG00000164211	STARD4	0.0171707	StAR-related lipid transfer (START) domain containing 4 [Source:HGNC Symbol;Acc:HGNC:18058]
ENSG00000201756	NA	0.0171936	Y RNA [Source:RFAM;Acc:RF00019]
ENSG00000204193	TXNDC8	0.0172413	thioredoxin domain containing 8 (spermatozoa) [Source:HGNC Symbol;Acc:HGNC:31454]
ENSG00000117602	RCAN3	0.0172508	RCAN family member 3 [Source:HGNC Symbol;Acc:HGNC:3042]
ENSG00000111737	RAB35	0.0172775	RAB35, member RAS oncogene family [Source:HGNC Symbol;Acc:HGNC:9774]
ENSG00000102904	TSNAXIP1	0.0173112	translin-associated factor X interacting protein 1 [Source:HGNC Symbol;Acc:HGNC:18586]
ENSG00000005075	POLR2J	0.0173137	polymerase (RNA) II (DNA directed) polypeptide J, 13.3kDa [Source:HGNC Symbol;Acc:HGNC:9197]
ENSG00000184708	EIF4ENIF1	0.0173232	eukaryotic translation initiation factor 4E nuclear import factor 1 [Source:HGNC Symbol;Acc:HGNC:16687]
ENSG00000178209	PLEC	0.0173614	plectin [Source:HGNC Symbol;Acc:HGNC:9069]
ENSG00000184166	OR1D2	0.0173628	olfactory receptor, family 1, subfamily D, member 2 [Source:HGNC Symbol;Acc:HGNC:8183]
ENSG00000073921	PICALM	0.0173772	phosphatidylinositol binding clathrin assembly protein [Source:HGNC Symbol;Acc:HGNC:15514]
ENSG00000201316	NA	0.0173779	Small nucleolar RNA SNORA7 [Source:RFAM;Acc:RF00409]
ENSG00000132321	IQCA1	0.0174369	IQ motif containing with AAA domain 1 [Source:HGNC Symbol;Acc:HGNC:26195]
ENSG00000112715	VEGFA	0.0174489	vascular endothelial growth factor A [Source:HGNC Symbol;Acc:HGNC:12680]
ENSG00000114166	KAT2B	0.0175155	K(lysine) acetyltransferase 2B [Source:HGNC Symbol;Acc:HGNC:8638]
ENSG00000252273	RNU6-426P	0.0175237	RNA, U6 small nuclear 426, pseudogene [Source:HGNC Symbol;Acc:HGNC:47389]
ENSG00000116957	TBCE	0.0175374	tubulin folding cofactor E [Source:HGNC Symbol;Acc:HGNC:11582]
ENSG00000135248	FAM71F1	0.0175479	family with sequence similarity 71, member F1 [Source:HGNC Symbol;Acc:HGNC:30704]
ENSG00000007216	SLC13A2	0.0176223	solute carrier family 13 (sodium-dependent dicarboxylate transporter), member 2 [Source:HGNC Symbol;Acc:HGNC:10917]
ENSG00000102878	HSF4	0.0176235	heat shock transcription factor 4 [Source:HGNC Symbol;Acc:HGNC:5227]
ENSG00000273703	HIST1H2BM	0.0176284	histone cluster 1, H2bm [Source:HGNC Symbol;Acc:HGNC:4750]
ENSG00000123453	SARDH	0.017638	sarcosine dehydrogenase [Source:HGNC Symbol;Acc:HGNC:10536]
ENSG00000012061	ERCC1	0.0176396	excision repair cross-complementation group 1 [Source:HGNC Symbol;Acc:HGNC:3433]
ENSG00000178694	NSUN3	0.0177074	NOP2/Sun domain family, member 3 [Source:HGNC Symbol;Acc:HGNC:26208]
ENSG00000092853	CLSPN	0.017724	claspin [Source:HGNC Symbol;Acc:HGNC:19715]
ENSG00000172262	ZNF131	0.0177488	zinc finger protein 131 [Source:HGNC Symbol;Acc:HGNC:12915]
ENSG00000169359	SLC33A1	0.0177499	solute carrier family 33 (acetyl-CoA transporter), member 1 [Source:HGNC Symbol;Acc:HGNC:95]
ENSG00000173769	TOPAZ1	0.0177511	testis and ovary specific PAZ domain containing 1 [Source:HGNC Symbol;Acc:HGNC:24746]
ENSG00000122786	CALD1	0.0177524	caldesmon 1 [Source:HGNC Symbol;Acc:HGNC:1441]
ENSG00000124449	IRGC	0.0177583	immunity-related GTPase family, cinema [Source:HGNC Symbol;Acc:HGNC:28835]
ENSG00000200161	RN7SKP145	0.0177868	RNA, 7SK small nuclear pseudogene 145 [Source:HGNC Symbol;Acc:HGNC:45869]
ENSG00000160957	RECQL4	0.0177943	RecQ protein-like 4 [Source:HGNC Symbol;Acc:HGNC:9949]
ENSG00000232605	HMGN2P11	0.0177949	high mobility group nucleosomal binding domain 2 pseudogene 11 [Source:HGNC Symbol;Acc:HGNC:4990]
ENSG00000154914	USP43	0.0178008	ubiquitin specific peptidase 43 [Source:HGNC Symbol;Acc:HGNC:20072]
ENSG00000121905	HPCA	0.0178095	hippocalcin [Source:HGNC Symbol;Acc:HGNC:5144]
ENSG00000079156	OSBPL6	0.0178456	oxysterol binding protein-like 6 [Source:HGNC Symbol;Acc:HGNC:16388]
ENSG00000201922	RNU1-43P	0.0178504	RNA, U1 small nuclear 43, pseudogene [Source:HGNC Symbol;Acc:HGNC:48385]
ENSG00000112742	TTK	0.0178576	TTK protein kinase [Source:HGNC Symbol;Acc:HGNC:12401]
ENSG00000119688	ABCD4	0.0178632	ATP-binding cassette, sub-family D (ALD), member 4 [Source:HGNC Symbol;Acc:HGNC:68]
ENSG00000141510	TP53	0.017921	tumor protein p53 [Source:HGNC Symbol;Acc:HGNC:11998]
ENSG00000104689	TNFRSF10A	0.0179257	tumor necrosis factor receptor superfamily, member 10a [Source:HGNC Symbol;Acc:HGNC:11904]
ENSG00000212266	NA	0.017926	Small nucleolar RNA SNORA40 [Source:RFAM;Acc:RF00561]
ENSG00000180913	OR56B3P	0.0180386	olfactory receptor, family 56, subfamily B, member 3 pseudogene [Source:HGNC Symbol;Acc:HGNC:15247]
ENSG00000133460	SLC2A11	0.0180488	solute carrier family 2 (facilitated glucose transporter), member 11 [Source:HGNC Symbol;Acc:HGNC:14239]
ENSG00000106327	TFR2	0.0180527	transferrin receptor 2 [Source:HGNC Symbol;Acc:HGNC:11762]
ENSG00000239708	RN7SL782P	0.0180563	RNA, 7SL, cytoplasmic 782, pseudogene [Source:HGNC Symbol;Acc:HGNC:46798]
ENSG00000140519	RHCG	0.0180687	Rh family, C glycoprotein [Source:HGNC Symbol;Acc:HGNC:18140]
ENSG00000156876	SASS6	0.0180699	spindle assembly 6 homolog (C. elegans) [Source:HGNC Symbol;Acc:HGNC:25403]
ENSG00000274290	HIST1H2BE	0.018123	histone cluster 1, H2be [Source:HGNC Symbol;Acc:HGNC:4753]
ENSG00000149823	VPS51	0.0181652	vacuolar protein sorting 51 homolog (S. cerevisiae) [Source:HGNC Symbol;Acc:HGNC:1172]
ENSG00000135457	TFCP2	0.0182115	transcription factor CP2 [Source:HGNC Symbol;Acc:HGNC:11748]
ENSG00000118496	FBXO30	0.0182144	F-box protein 30 [Source:HGNC Symbol;Acc:HGNC:15600]
ENSG00000180437	OR6K4P	0.01824	olfactory receptor, family 6, subfamily K, member 4 pseudogene [Source:HGNC Symbol;Acc:HGNC:15031]
ENSG00000142556	ZNF614	0.018329	zinc finger protein 614 [Source:HGNC Symbol;Acc:HGNC:24722]
ENSG00000101188	NTSR1	0.0183455	neurotensin receptor 1 (high affinity) [Source:HGNC Symbol;Acc:HGNC:8039]
ENSG00000106244	PDAP1	0.0183983	PDGFA associated protein 1 [Source:HGNC Symbol;Acc:HGNC:14634]
ENSG00000117360	PRPF3	0.0184128	pre-mRNA processing factor 3 [Source:HGNC Symbol;Acc:HGNC:17348]
ENSG00000204671	IL31	0.0184234	interleukin 31 [Source:HGNC Symbol;Acc:HGNC:19372]
ENSG00000118298	CA14	0.018444	carbonic anhydrase XIV [Source:HGNC Symbol;Acc:HGNC:1372]
ENSG00000172000	ZNF556	0.0184559	zinc finger protein 556 [Source:HGNC Symbol;Acc:HGNC:25669]
ENSG00000100360	IFT27	0.0184614	intraflagellar transport 27 [Source:HGNC Symbol;Acc:HGNC:18626]
ENSG00000156574	NODAL	0.0185016	nodal growth differentiation factor [Source:HGNC Symbol;Acc:HGNC:7865]
ENSG00000183638	RP1L1	0.0185246	retinitis pigmentosa 1-like 1 [Source:HGNC Symbol;Acc:HGNC:15946]
ENSG00000179950	PUF60	0.0185257	poly-U binding splicing factor 60KDa [Source:HGNC Symbol;Acc:HGNC:17042]
ENSG00000147256	ARHGAP36	0.0185362	Rho GTPase activating protein 36 [Source:HGNC Symbol;Acc:HGNC:26388]
ENSG00000137574	TGS1	0.0186882	trimethylguanosine synthase 1 [Source:HGNC Symbol;Acc:HGNC:17843]
ENSG00000233827	FAM58BP	0.0186887	family with sequence similarity 58, member B, pseudogene [Source:HGNC Symbol;Acc:HGNC:27373]
ENSG00000252621	NA	0.018693	Y RNA [Source:RFAM;Acc:RF00019]
ENSG00000149201	CCDC81	0.0187001	coiled-coil domain containing 81 [Source:HGNC Symbol;Acc:HGNC:26281]
ENSG00000167395	ZNF646	0.0187219	zinc finger protein 646 [Source:HGNC Symbol;Acc:HGNC:29004]
ENSG00000168152	THAP9	0.0187318	THAP domain containing 9 [Source:HGNC Symbol;Acc:HGNC:23192]
ENSG00000169297	NR0B1	0.0188034	nuclear receptor subfamily 0, group B, member 1 [Source:HGNC Symbol;Acc:HGNC:7960]
ENSG00000089639	GMIP	0.0188041	GEM interacting protein [Source:HGNC Symbol;Acc:HGNC:24852]
ENSG00000172366	FAM195A	0.0188152	family with sequence similarity 195, member A [Source:HGNC Symbol;Acc:HGNC:14142]
ENSG00000040633	PHF23	0.018938	PHD finger protein 23 [Source:HGNC Symbol;Acc:HGNC:28428]
ENSG00000197892	KIF13B	0.0189669	kinesin family member 13B [Source:HGNC Symbol;Acc:HGNC:14405]
ENSG00000105967	TFEC	0.0189719	transcription factor EC [Source:HGNC Symbol;Acc:HGNC:11754]
ENSG00000185624	P4HB	0.0189734	prolyl 4-hydroxylase, beta polypeptide [Source:HGNC Symbol;Acc:HGNC:8548]
ENSG00000205495	OR52J3	0.0190043	olfactory receptor, family 52, subfamily J, member 3 [Source:HGNC Symbol;Acc:HGNC:14799]
ENSG00000178852	EFCAB13	0.0190232	EF-hand calcium binding domain 13 [Source:HGNC Symbol;Acc:HGNC:26864]
ENSG00000226525	RPS7P10	0.0190416	ribosomal protein S7 pseudogene 10 [Source:HGNC Symbol;Acc:HGNC:39903]
ENSG00000153786	ZDHHC7	0.0190948	zinc finger, DHHC-type containing 7 [Source:HGNC Symbol;Acc:HGNC:18459]
ENSG00000132958	TPTE2	0.0191302	transmembrane phosphoinositide 3-phosphatase and tensin homolog 2 [Source:HGNC Symbol;Acc:HGNC:17299]
ENSG00000226288	OR52I2	0.0191544	olfactory receptor, family 52, subfamily I, member 2 [Source:HGNC Symbol;Acc:HGNC:15221]
ENSG00000166407	LMO1	0.0191564	LIM domain only 1 (rhombotin 1) [Source:HGNC Symbol;Acc:HGNC:6641]
ENSG00000137814	HAUS2	0.019163	HAUS augmin-like complex, subunit 2 [Source:HGNC Symbol;Acc:HGNC:25530]
ENSG00000141034	GID4	0.0192082	GID complex subunit 4 [Source:HGNC Symbol;Acc:HGNC:28453]
ENSG00000168843	FSTL5	0.0192208	follistatin-like 5 [Source:HGNC Symbol;Acc:HGNC:21386]
ENSG00000125888	BANF2	0.0192474	barrier to autointegration factor 2 [Source:HGNC Symbol;Acc:HGNC:16172]
ENSG00000180340	FZD2	0.019259	frizzled class receptor 2 [Source:HGNC Symbol;Acc:HGNC:4040]
ENSG00000083937	CHMP2B	0.0192716	charged multivesicular body protein 2B [Source:HGNC Symbol;Acc:HGNC:24537]
ENSG00000183128	CALHM3	0.0193073	calcium homeostasis modulator 3 [Source:HGNC Symbol;Acc:HGNC:23458]
ENSG00000130173	C19orf80	0.0193128	chromosome 19 open reading frame 80 [Source:HGNC Symbol;Acc:HGNC:24933]
ENSG00000181031	RPH3AL	0.0193131	rabphilin 3A-like (without C2 domains) [Source:HGNC Symbol;Acc:HGNC:10296]
ENSG00000229238	PPP1R12BP1	0.0193137	protein phosphatase 1, regulatory subunit 12B pseudogene, Y-linked 1 [Source:HGNC Symbol;Acc:HGNC:18498]
ENSG00000124532	MRS2	0.0193174	MRS2 magnesium transporter [Source:HGNC Symbol;Acc:HGNC:13785]
ENSG00000171360	KRT38	0.019326	keratin 38 [Source:HGNC Symbol;Acc:HGNC:6456]
ENSG00000182557	SPNS3	0.0193405	spinster homolog 3 (Drosophila) [Source:HGNC Symbol;Acc:HGNC:28433]
ENSG00000171160	MORN4	0.0193461	MORN repeat containing 4 [Source:HGNC Symbol;Acc:HGNC:24001]
ENSG00000131080	EDA2R	0.0193538	ectodysplasin A2 receptor [Source:HGNC Symbol;Acc:HGNC:17756]
ENSG00000153993	SEMA3D	0.0193666	sema domain, immunoglobulin domain (Ig), short basic domain, secreted, (semaphorin) 3D [Source:HGNC Symbol;Acc:HGNC:10726]
ENSG00000131196	NFATC1	0.0193802	nuclear factor of activated T-cells, cytoplasmic, calcineurin-dependent 1 [Source:HGNC Symbol;Acc:HGNC:7775]
ENSG00000142173	COL6A2	0.0193995	collagen, type VI, alpha 2 [Source:HGNC Symbol;Acc:HGNC:2212]
ENSG00000171533	MAP6	0.0194537	microtubule-associated protein 6 [Source:HGNC Symbol;Acc:HGNC:6868]
ENSG00000042832	TG	0.0194876	thyroglobulin [Source:HGNC Symbol;Acc:HGNC:11764]
ENSG00000057704	TMCC3	0.0195132	transmembrane and coiled-coil domain family 3 [Source:HGNC Symbol;Acc:HGNC:29199]
ENSG00000146109	ABT1	0.0195316	activator of basal transcription 1 [Source:HGNC Symbol;Acc:HGNC:17369]
ENSG00000236981	OR10G9	0.0195502	olfactory receptor, family 10, subfamily G, member 9 [Source:HGNC Symbol;Acc:HGNC:15129]
ENSG00000150977	RILPL2	0.019589	Rab interacting lysosomal protein-like 2 [Source:HGNC Symbol;Acc:HGNC:28787]
ENSG00000118729	CASQ2	0.0196135	calsequestrin 2 (cardiac muscle) [Source:HGNC Symbol;Acc:HGNC:1513]
ENSG00000125851	PCSK2	0.0196186	proprotein convertase subtilisin/kexin type 2 [Source:HGNC Symbol;Acc:HGNC:8744]
ENSG00000116213	WRAP73	0.0196351	WD repeat containing, antisense to TP73 [Source:HGNC Symbol;Acc:HGNC:12759]
ENSG00000236104	ZBTB22	0.0196422	zinc finger and BTB domain containing 22 [Source:HGNC Symbol;Acc:HGNC:13085]
ENSG00000100281	HMGXB4	0.019675	HMG box domain containing 4 [Source:HGNC Symbol;Acc:HGNC:5003]
ENSG00000105366	SIGLEC8	0.0196962	sialic acid binding Ig-like lectin 8 [Source:HGNC Symbol;Acc:HGNC:10877]
ENSG00000113525	IL5	0.019769	interleukin 5 [Source:HGNC Symbol;Acc:HGNC:6016]
ENSG00000115758	ODC1	0.0197747	ornithine decarboxylase 1 [Source:HGNC Symbol;Acc:HGNC:8109]
ENSG00000160072	ATAD3B	0.0197806	ATPase family, AAA domain containing 3B [Source:HGNC Symbol;Acc:HGNC:24007]
ENSG00000079819	EPB41L2	0.0198114	erythrocyte membrane protein band 4.1-like 2 [Source:HGNC Symbol;Acc:HGNC:3379]
ENSG00000254585	MAGEL2	0.0198243	MAGE-like 2 [Source:HGNC Symbol;Acc:HGNC:6814]
ENSG00000207797	MIR187	0.0198391	microRNA 187 [Source:HGNC Symbol;Acc:HGNC:31558]
ENSG00000215271	HOMEZ	0.0198716	homeobox and leucine zipper encoding [Source:HGNC Symbol;Acc:HGNC:20164]
ENSG00000099960	SLC7A4	0.0198815	solute carrier family 7, member 4 [Source:HGNC Symbol;Acc:HGNC:11062]
ENSG00000162645	GBP2	0.0199042	guanylate binding protein 2, interferon-inducible [Source:HGNC Symbol;Acc:HGNC:4183]
ENSG00000160472	TMEM190	0.0199097	transmembrane protein 190 [Source:HGNC Symbol;Acc:HGNC:29632]
ENSG00000068394	GPKOW	0.0199115	G patch domain and KOW motifs [Source:HGNC Symbol;Acc:HGNC:30677]
ENSG00000182307	C8orf33	0.0199362	chromosome 8 open reading frame 33 [Source:HGNC Symbol;Acc:HGNC:26104]
ENSG00000162897	FCAMR	0.0199415	Fc receptor, IgA, IgM, high affinity [Source:HGNC Symbol;Acc:HGNC:24692]
ENSG00000178662	CSRNP3	0.0199674	cysteine-serine-rich nuclear protein 3 [Source:HGNC Symbol;Acc:HGNC:30729]
ENSG00000198812	LRRC10	0.0199978	leucine rich repeat containing 10 [Source:HGNC Symbol;Acc:HGNC:20264]
ENSG00000184678	HIST2H2BE	0.020043	histone cluster 2, H2be [Source:HGNC Symbol;Acc:HGNC:4760]
ENSG00000113648	H2AFY	0.0200994	H2A histone family, member Y [Source:HGNC Symbol;Acc:HGNC:4740]
ENSG00000067445	TRO	0.020145	trophinin [Source:HGNC Symbol;Acc:HGNC:12326]
ENSG00000153406	NMRAL1	0.0201595	NmrA-like family domain containing 1 [Source:HGNC Symbol;Acc:HGNC:24987]
ENSG00000164509	IL31RA	0.0201608	interleukin 31 receptor A [Source:HGNC Symbol;Acc:HGNC:18969]
ENSG00000131686	CA6	0.0202569	carbonic anhydrase VI [Source:HGNC Symbol;Acc:HGNC:1380]
ENSG00000188542	DUSP28	0.0202639	dual specificity phosphatase 28 [Source:HGNC Symbol;Acc:HGNC:33237]
ENSG00000240637	RN7SL808P	0.0202647	RNA, 7SL, cytoplasmic 808, pseudogene [Source:HGNC Symbol;Acc:HGNC:46824]
ENSG00000116132	PRRX1	0.02027	paired related homeobox 1 [Source:HGNC Symbol;Acc:HGNC:9142]
ENSG00000201066	RN7SKP280	0.0203018	RNA, 7SK small nuclear pseudogene 280 [Source:HGNC Symbol;Acc:HGNC:46004]
ENSG00000145861	C1QTNF2	0.0203151	C1q and tumor necrosis factor related protein 2 [Source:HGNC Symbol;Acc:HGNC:14325]
ENSG00000200508	NA	0.0203635	Y RNA [Source:RFAM;Acc:RF00019]
ENSG00000113580	NR3C1	0.020379	nuclear receptor subfamily 3, group C, member 1 (glucocorticoid receptor) [Source:HGNC Symbol;Acc:HGNC:7978]
ENSG00000201245	NA	0.0203907	Small nucleolar RNA SNORA25 [Source:RFAM;Acc:RF00402]
ENSG00000170209	ANKK1	0.0203938	ankyrin repeat and kinase domain containing 1 [Source:HGNC Symbol;Acc:HGNC:21027]
ENSG00000196943	NOP9	0.0204025	NOP9 nucleolar protein [Source:HGNC Symbol;Acc:HGNC:19826]
ENSG00000078237	C12orf5	0.0204152	chromosome 12 open reading frame 5 [Source:HGNC Symbol;Acc:HGNC:1185]
ENSG00000176714	CCDC121	0.0204344	coiled-coil domain containing 121 [Source:HGNC Symbol;Acc:HGNC:25833]
ENSG00000121900	TMEM54	0.0204348	transmembrane protein 54 [Source:HGNC Symbol;Acc:HGNC:24143]
ENSG00000158731	OR10J6P	0.0204474	olfactory receptor, family 10, subfamily J, member 6 pseudogene [Source:HGNC Symbol;Acc:HGNC:14994]
ENSG00000171402	XAGE3	0.0205029	X antigen family, member 3 [Source:HGNC Symbol;Acc:HGNC:14618]
ENSG00000135945	REV1	0.0205151	REV1, polymerase (DNA directed) [Source:HGNC Symbol;Acc:HGNC:14060]
ENSG00000104237	RP1	0.0205283	retinitis pigmentosa 1 (autosomal dominant) [Source:HGNC Symbol;Acc:HGNC:10263]
ENSG00000142528	ZNF473	0.0205441	zinc finger protein 473 [Source:HGNC Symbol;Acc:HGNC:23239]
ENSG00000199683	RN7SKP185	0.0206061	RNA, 7SK small nuclear pseudogene 185 [Source:HGNC Symbol;Acc:HGNC:45909]
ENSG00000106615	RHEB	0.0206179	Ras homolog enriched in brain [Source:HGNC Symbol;Acc:HGNC:10011]
ENSG00000137274	BPHL	0.0206452	biphenyl hydrolase-like (serine hydrolase) [Source:HGNC Symbol;Acc:HGNC:1094]
ENSG00000126759	CFP	0.0206694	complement factor properdin [Source:HGNC Symbol;Acc:HGNC:8864]
ENSG00000247746	USP51	0.0206837	ubiquitin specific peptidase 51 [Source:HGNC Symbol;Acc:HGNC:23086]
ENSG00000173208	ABCD2	0.0207013	ATP-binding cassette, sub-family D (ALD), member 2 [Source:HGNC Symbol;Acc:HGNC:66]
ENSG00000115155	OTOF	0.0207021	otoferlin [Source:HGNC Symbol;Acc:HGNC:8515]
ENSG00000126861	OMG	0.0207102	oligodendrocyte myelin glycoprotein [Source:HGNC Symbol;Acc:HGNC:8135]
ENSG00000156253	RWDD2B	0.0207243	RWD domain containing 2B [Source:HGNC Symbol;Acc:HGNC:1302]
ENSG00000117419	ERI3	0.0207281	ERI1 exoribonuclease family member 3 [Source:HGNC Symbol;Acc:HGNC:17276]
ENSG00000107014	RLN2	0.0207681	relaxin 2 [Source:HGNC Symbol;Acc:HGNC:10027]
ENSG00000118689	FOXO3	0.0208188	forkhead box O3 [Source:HGNC Symbol;Acc:HGNC:3821]
ENSG00000222982	RN7SKP216	0.0208408	RNA, 7SK small nuclear pseudogene 216 [Source:HGNC Symbol;Acc:HGNC:45940]
ENSG00000147251	DOCK11	0.020899	dedicator of cytokinesis 11 [Source:HGNC Symbol;Acc:HGNC:23483]
ENSG00000188529	SRSF10	0.0209133	serine/arginine-rich splicing factor 10 [Source:HGNC Symbol;Acc:HGNC:16713]
ENSG00000137101	CD72	0.0209567	CD72 molecule [Source:HGNC Symbol;Acc:HGNC:1696]
ENSG00000175785	PRIMA1	0.0209841	proline rich membrane anchor 1 [Source:HGNC Symbol;Acc:HGNC:18319]
ENSG00000176720	BOK	0.0209921	BCL2-related ovarian killer [Source:HGNC Symbol;Acc:HGNC:1087]
ENSG00000197948	FCHSD1	0.0209973	FCH and double SH3 domains 1 [Source:HGNC Symbol;Acc:HGNC:25463]
ENSG00000143575	HAX1	0.0210537	HCLS1 associated protein X-1 [Source:HGNC Symbol;Acc:HGNC:16915]
ENSG00000199866	NA	0.0211044	Y RNA [Source:RFAM;Acc:RF00019]
ENSG00000130176	CNN1	0.0211187	calponin 1, basic, smooth muscle [Source:HGNC Symbol;Acc:HGNC:2155]
ENSG00000189139	FSCB	0.0211585	fibrous sheath CABYR binding protein [Source:HGNC Symbol;Acc:HGNC:20494]
ENSG00000185982	DEFB128	0.021159	defensin, beta 128 [Source:HGNC Symbol;Acc:HGNC:18106]
ENSG00000158859	ADAMTS4	0.0211726	ADAM metallopeptidase with thrombospondin type 1 motif, 4 [Source:HGNC Symbol;Acc:HGNC:220]
ENSG00000112077	RHAG	0.0211763	Rh-associated glycoprotein [Source:HGNC Symbol;Acc:HGNC:10006]
ENSG00000163568	AIM2	0.0211953	absent in melanoma 2 [Source:HGNC Symbol;Acc:HGNC:357]
ENSG00000121957	GPSM2	0.0212273	G-protein signaling modulator 2 [Source:HGNC Symbol;Acc:HGNC:29501]
ENSG00000144827	ABHD10	0.0212367	abhydrolase domain containing 10 [Source:HGNC Symbol;Acc:HGNC:25656]
ENSG00000187773	FAM69C	0.0212534	family with sequence similarity 69, member C [Source:HGNC Symbol;Acc:HGNC:31729]
ENSG00000204634	TBC1D8	0.0212552	TBC1 domain family, member 8 (with GRAM domain) [Source:HGNC Symbol;Acc:HGNC:17791]
ENSG00000162704	ARPC5	0.0213414	actin related protein 2/3 complex, subunit 5, 16kDa [Source:HGNC Symbol;Acc:HGNC:708]
ENSG00000236320	SLFN14	0.0213479	schlafen family member 14 [Source:HGNC Symbol;Acc:HGNC:32689]
ENSG00000151233	GXYLT1	0.0213824	glucoside xylosyltransferase 1 [Source:HGNC Symbol;Acc:HGNC:27482]
ENSG00000167755	KLK6	0.0214234	kallikrein-related peptidase 6 [Source:HGNC Symbol;Acc:HGNC:6367]
ENSG00000104723	TUSC3	0.0214242	tumor suppressor candidate 3 [Source:HGNC Symbol;Acc:HGNC:30242]
ENSG00000165699	TSC1	0.021446	tuberous sclerosis 1 [Source:HGNC Symbol;Acc:HGNC:12362]
ENSG00000125652	ALKBH7	0.0214822	alkB, alkylation repair homolog 7 (E. coli) [Source:HGNC Symbol;Acc:HGNC:21306]
ENSG00000135175	OCM2	0.0214954	oncomodulin 2 [Source:HGNC Symbol;Acc:HGNC:34396]
ENSG00000197587	DMBX1	0.0215311	diencephalon/mesencephalon homeobox 1 [Source:HGNC Symbol;Acc:HGNC:19026]
ENSG00000158296	SLC13A3	0.0215401	solute carrier family 13 (sodium-dependent dicarboxylate transporter), member 3 [Source:HGNC Symbol;Acc:HGNC:14430]
ENSG00000252218	NA	0.0215676	Small Cajal body specific RNA 15 [Source:RFAM;Acc:RF00426]
ENSG00000109047	RCVRN	0.0215827	recoverin [Source:HGNC Symbol;Acc:HGNC:9937]
ENSG00000027697	IFNGR1	0.0216127	interferon gamma receptor 1 [Source:HGNC Symbol;Acc:HGNC:5439]
ENSG00000179277	MEIS3P1	0.0216925	Meis homeobox 3 pseudogene 1 [Source:HGNC Symbol;Acc:HGNC:7002]
ENSG00000205208	C4orf46	0.021711	chromosome 4 open reading frame 46 [Source:HGNC Symbol;Acc:HGNC:27320]
ENSG00000136937	NCBP1	0.0217111	nuclear cap binding protein subunit 1, 80kDa [Source:HGNC Symbol;Acc:HGNC:7658]
ENSG00000129315	CCNT1	0.0217199	cyclin T1 [Source:HGNC Symbol;Acc:HGNC:1599]
ENSG00000276396	NA	0.0218424	Metazoan signal recognition particle RNA [Source:RFAM;Acc:RF00017]
ENSG00000220758	VN1R10P	0.0218456	vomeronasal 1 receptor 10 pseudogene [Source:HGNC Symbol;Acc:HGNC:13550]
ENSG00000070759	TESK2	0.0218458	testis-specific kinase 2 [Source:HGNC Symbol;Acc:HGNC:11732]
ENSG00000163659	TIPARP	0.0219372	TCDD-inducible poly(ADP-ribose) polymerase [Source:HGNC Symbol;Acc:HGNC:23696]
ENSG00000171044	XKR6	0.0219377	XK, Kell blood group complex subunit-related family, member 6 [Source:HGNC Symbol;Acc:HGNC:27806]
ENSG00000196476	C20orf96	0.0219468	chromosome 20 open reading frame 96 [Source:HGNC Symbol;Acc:HGNC:16227]
ENSG00000028839	TBPL1	0.021951	TBP-like 1 [Source:HGNC Symbol;Acc:HGNC:11589]
ENSG00000153975	ZUFSP	0.0219634	zinc finger with UFM1-specific peptidase domain [Source:HGNC Symbol;Acc:HGNC:21224]
ENSG00000181135	ZNF707	0.0219691	zinc finger protein 707 [Source:HGNC Symbol;Acc:HGNC:27815]
ENSG00000212609	RNU1-139P	0.0219835	RNA, U1 small nuclear 139, pseudogene [Source:HGNC Symbol;Acc:HGNC:48481]
ENSG00000142621	FHAD1	0.0219926	forkhead-associated (FHA) phosphopeptide binding domain 1 [Source:HGNC Symbol;Acc:HGNC:29408]
ENSG00000100941	PNN	0.0220221	pinin, desmosome associated protein [Source:HGNC Symbol;Acc:HGNC:9162]
ENSG00000196104	SPOCK3	0.0220243	sparc/osteonectin, cwcv and kazal-like domains proteoglycan (testican) 3 [Source:HGNC Symbol;Acc:HGNC:13565]
ENSG00000185177	ZNF479	0.0220298	zinc finger protein 479 [Source:HGNC Symbol;Acc:HGNC:23258]
ENSG00000147724	FAM135B	0.0220527	family with sequence similarity 135, member B [Source:HGNC Symbol;Acc:HGNC:28029]
ENSG00000165799	RNASE7	0.0220568	ribonuclease, RNase A family, 7 [Source:HGNC Symbol;Acc:HGNC:19278]
ENSG00000113161	HMGCR	0.0220653	3-hydroxy-3-methylglutaryl-CoA reductase [Source:HGNC Symbol;Acc:HGNC:5006]
ENSG00000105483	CARD8	0.0220773	caspase recruitment domain family, member 8 [Source:HGNC Symbol;Acc:HGNC:17057]
ENSG00000107175	CREB3	0.0221114	cAMP responsive element binding protein 3 [Source:HGNC Symbol;Acc:HGNC:2347]
ENSG00000186207	LCE5A	0.0221186	late cornified envelope 5A [Source:HGNC Symbol;Acc:HGNC:16614]
ENSG00000119684	MLH3	0.0221425	mutL homolog 3 [Source:HGNC Symbol;Acc:HGNC:7128]
ENSG00000182871	COL18A1	0.0221665	collagen, type XVIII, alpha 1 [Source:HGNC Symbol;Acc:HGNC:2195]
ENSG00000088280	ASAP3	0.0221702	ArfGAP with SH3 domain, ankyrin repeat and PH domain 3 [Source:HGNC Symbol;Acc:HGNC:14987]
ENSG00000114315	HES1	0.0221777	hes family bHLH transcription factor 1 [Source:HGNC Symbol;Acc:HGNC:5192]
ENSG00000212595	NA	0.0222108	5S ribosomal RNA [Source:RFAM;Acc:RF00001]
ENSG00000165929	TC2N	0.0222494	tandem C2 domains, nuclear [Source:HGNC Symbol;Acc:HGNC:19859]
ENSG00000200189	RNU6-832P	0.0222626	RNA, U6 small nuclear 832, pseudogene [Source:HGNC Symbol;Acc:HGNC:47795]
ENSG00000137825	ITPKA	0.0222709	inositol-trisphosphate 3-kinase A [Source:HGNC Symbol;Acc:HGNC:6178]
ENSG00000179958	DCTPP1	0.022293	dCTP pyrophosphatase 1 [Source:HGNC Symbol;Acc:HGNC:28777]
ENSG00000161920	MED11	0.0223036	mediator complex subunit 11 [Source:HGNC Symbol;Acc:HGNC:32687]
ENSG00000102393	GLA	0.0223208	galactosidase, alpha [Source:HGNC Symbol;Acc:HGNC:4296]
ENSG00000153721	CNKSR3	0.0223654	CNKSR family member 3 [Source:HGNC Symbol;Acc:HGNC:23034]
ENSG00000185608	MRPL40	0.0223927	mitochondrial ribosomal protein L40 [Source:HGNC Symbol;Acc:HGNC:14491]
ENSG00000162878	PKDCC	0.0224008	protein kinase domain containing, cytoplasmic [Source:HGNC Symbol;Acc:HGNC:25123]
ENSG00000161634	DCD	0.0224198	dermcidin [Source:HGNC Symbol;Acc:HGNC:14669]
ENSG00000113368	LMNB1	0.0224297	lamin B1 [Source:HGNC Symbol;Acc:HGNC:6637]
ENSG00000155974	GRIP1	0.0224616	glutamate receptor interacting protein 1 [Source:HGNC Symbol;Acc:HGNC:18708]
ENSG00000176798	OR51L1	0.0225107	olfactory receptor, family 51, subfamily L, member 1 [Source:HGNC Symbol;Acc:HGNC:14759]
ENSG00000172551	MUCL1	0.0225108	mucin-like 1 [Source:HGNC Symbol;Acc:HGNC:30588]
ENSG00000111203	ITFG2	0.0225118	integrin alpha FG-GAP repeat containing 2 [Source:HGNC Symbol;Acc:HGNC:30879]
ENSG00000105523	FAM83E	0.0225166	family with sequence similarity 83, member E [Source:HGNC Symbol;Acc:HGNC:25972]
ENSG00000165669	FAM204A	0.0225422	family with sequence similarity 204, member A [Source:HGNC Symbol;Acc:HGNC:25794]
ENSG00000197165	SULT1A2	0.0225902	sulfotransferase family, cytosolic, 1A, phenol-preferring, member 2 [Source:HGNC Symbol;Acc:HGNC:11454]
ENSG00000103047	TANGO6	0.0226453	transport and golgi organization 6 homolog (Drosophila) [Source:HGNC Symbol;Acc:HGNC:25749]
ENSG00000124279	FASTKD3	0.0226578	FAST kinase domains 3 [Source:HGNC Symbol;Acc:HGNC:28758]
ENSG00000100314	CABP7	0.0226579	calcium binding protein 7 [Source:HGNC Symbol;Acc:HGNC:20834]
ENSG00000105472	CLEC11A	0.0226784	C-type lectin domain family 11, member A [Source:HGNC Symbol;Acc:HGNC:10576]
ENSG00000137699	TRIM29	0.0227033	tripartite motif containing 29 [Source:HGNC Symbol;Acc:HGNC:17274]
ENSG00000159251	ACTC1	0.0227279	actin, alpha, cardiac muscle 1 [Source:HGNC Symbol;Acc:HGNC:143]
ENSG00000129351	ILF3	0.0227323	interleukin enhancer binding factor 3, 90kDa [Source:HGNC Symbol;Acc:HGNC:6038]
ENSG00000114019	AMOTL2	0.0227422	angiomotin like 2 [Source:HGNC Symbol;Acc:HGNC:17812]
ENSG00000204173	LRRC37A5P	0.0227868	leucine rich repeat containing 37, member A5, pseudogene [Source:HGNC Symbol;Acc:HGNC:23369]
ENSG00000172409	CLP1	0.0228029	cleavage and polyadenylation factor I subunit 1 [Source:HGNC Symbol;Acc:HGNC:16999]
ENSG00000180769	WDFY3-AS2	0.0228041	WDFY3 antisense RNA 2 [Source:HGNC Symbol;Acc:HGNC:21603]
ENSG00000148572	NRBF2	0.0228339	nuclear receptor binding factor 2 [Source:HGNC Symbol;Acc:HGNC:19692]
ENSG00000201074	NA	0.0228381	Y RNA [Source:RFAM;Acc:RF00019]
ENSG00000013810	TACC3	0.0228695	transforming, acidic coiled-coil containing protein 3 [Source:HGNC Symbol;Acc:HGNC:11524]
ENSG00000221930	FAM45B	0.0229172	family with sequence similarity 45, member B (pseudogene) [Source:HGNC Symbol;Acc:HGNC:30886]
ENSG00000170516	COX7B2	0.022963	cytochrome c oxidase subunit VIIb2 [Source:HGNC Symbol;Acc:HGNC:24381]
ENSG00000200652	NA	0.02298	Small nucleolar RNA SNORA25 [Source:RFAM;Acc:RF00402]
ENSG00000105516	DBP	0.0229801	D site of albumin promoter (albumin D-box) binding protein [Source:HGNC Symbol;Acc:HGNC:2697]
ENSG00000237149	ZNF503-AS2	0.0230424	ZNF503 antisense RNA 2 [Source:HGNC Symbol;Acc:HGNC:23525]
ENSG00000180185	FAHD1	0.0230543	fumarylacetoacetate hydrolase domain containing 1 [Source:HGNC Symbol;Acc:HGNC:14169]
ENSG00000081913	PHLPP1	0.0230705	PH domain and leucine rich repeat protein phosphatase 1 [Source:HGNC Symbol;Acc:HGNC:20610]
ENSG00000140521	POLG	0.0230728	polymerase (DNA directed), gamma [Source:HGNC Symbol;Acc:HGNC:9179]
ENSG00000022840	RNF10	0.0231808	ring finger protein 10 [Source:HGNC Symbol;Acc:HGNC:10055]
ENSG00000119487	MAPKAP1	0.023236	mitogen-activated protein kinase associated protein 1 [Source:HGNC Symbol;Acc:HGNC:18752]
ENSG00000197024	ZNF398	0.0232657	zinc finger protein 398 [Source:HGNC Symbol;Acc:HGNC:18373]
ENSG00000161082	CELF5	0.0232929	CUGBP, Elav-like family member 5 [Source:HGNC Symbol;Acc:HGNC:14058]
ENSG00000164690	SHH	0.0233073	sonic hedgehog [Source:HGNC Symbol;Acc:HGNC:10848]
ENSG00000182199	SHMT2	0.0233362	serine hydroxymethyltransferase 2 (mitochondrial) [Source:HGNC Symbol;Acc:HGNC:10852]
ENSG00000276031	NA	0.0233517	Metazoan signal recognition particle RNA [Source:RFAM;Acc:RF00017]
ENSG00000200732	RNU6-194P	0.0233591	RNA, U6 small nuclear 194, pseudogene [Source:HGNC Symbol;Acc:HGNC:47157]
ENSG00000207317	NA	0.0233704	Y RNA [Source:RFAM;Acc:RF00019]
ENSG00000242769	RN7SL432P	0.0233809	RNA, 7SL, cytoplasmic 432, pseudogene [Source:HGNC Symbol;Acc:HGNC:46448]
ENSG00000137193	PIM1	0.0234053	Pim-1 proto-oncogene, serine/threonine kinase [Source:HGNC Symbol;Acc:HGNC:8986]
ENSG00000252258	NA	0.023473	Small nucleolar RNA SNORA70 [Source:RFAM;Acc:RF00156]
ENSG00000161013	MGAT4B	0.023495	mannosyl (alpha-1,3-)-glycoprotein beta-1,4-N-acetylglucosaminyltransferase, isozyme B [Source:HGNC Symbol;Acc:HGNC:7048]
ENSG00000185737	NRG3	0.0235186	neuregulin 3 [Source:HGNC Symbol;Acc:HGNC:7999]
ENSG00000162994	CLHC1	0.0235201	clathrin heavy chain linker domain containing 1 [Source:HGNC Symbol;Acc:HGNC:26453]
ENSG00000085511	MAP3K4	0.0235349	mitogen-activated protein kinase kinase kinase 4 [Source:HGNC Symbol;Acc:HGNC:6856]
ENSG00000146285	SCML4	0.0235351	sex comb on midleg-like 4 (Drosophila) [Source:HGNC Symbol;Acc:HGNC:21397]
ENSG00000150756	FAM173B	0.0235412	family with sequence similarity 173, member B [Source:HGNC Symbol;Acc:HGNC:27029]
ENSG00000101868	POLA1	0.0235474	polymerase (DNA directed), alpha 1, catalytic subunit [Source:HGNC Symbol;Acc:HGNC:9173]
ENSG00000102349	KLF8	0.0235686	Kruppel-like factor 8 [Source:HGNC Symbol;Acc:HGNC:6351]
ENSG00000101152	DNAJC5	0.0235914	DnaJ (Hsp40) homolog, subfamily C, member 5 [Source:HGNC Symbol;Acc:HGNC:16235]
ENSG00000139597	N4BP2L1	0.0237267	NEDD4 binding protein 2-like 1 [Source:HGNC Symbol;Acc:HGNC:25037]
ENSG00000162722	TRIM58	0.0237331	tripartite motif containing 58 [Source:HGNC Symbol;Acc:HGNC:24150]
ENSG00000072954	TMEM38A	0.0237417	transmembrane protein 38A [Source:HGNC Symbol;Acc:HGNC:28462]
ENSG00000125510	OPRL1	0.023748	opiate receptor-like 1 [Source:HGNC Symbol;Acc:HGNC:8155]
ENSG00000123191	ATP7B	0.023795	ATPase, Cu++ transporting, beta polypeptide [Source:HGNC Symbol;Acc:HGNC:870]
ENSG00000201610	RNA5SP84	0.0238312	RNA, 5S ribosomal pseudogene 84 [Source:HGNC Symbol;Acc:HGNC:42882]
ENSG00000124422	USP22	0.0238472	ubiquitin specific peptidase 22 [Source:HGNC Symbol;Acc:HGNC:12621]
ENSG00000137478	FCHSD2	0.0238507	FCH and double SH3 domains 2 [Source:HGNC Symbol;Acc:HGNC:29114]
ENSG00000221574	RNU6ATAC33P	0.0238967	RNA, U6atac small nuclear 33, pseudogene [Source:HGNC Symbol;Acc:HGNC:46932]
ENSG00000132952	USPL1	0.0239207	ubiquitin specific peptidase like 1 [Source:HGNC Symbol;Acc:HGNC:20294]
ENSG00000140939	NOL3	0.0239717	nucleolar protein 3 (apoptosis repressor with CARD domain) [Source:HGNC Symbol;Acc:HGNC:7869]
ENSG00000135315	CEP162	0.0240554	centrosomal protein 162kDa [Source:HGNC Symbol;Acc:HGNC:21107]
ENSG00000147669	POLR2K	0.0240978	polymerase (RNA) II (DNA directed) polypeptide K, 7.0kDa [Source:HGNC Symbol;Acc:HGNC:9198]
ENSG00000240694	PNMA2	0.0241171	paraneoplastic Ma antigen 2 [Source:HGNC Symbol;Acc:HGNC:9159]
ENSG00000196850	PPTC7	0.024149	PTC7 protein phosphatase homolog (S. cerevisiae) [Source:HGNC Symbol;Acc:HGNC:30695]
ENSG00000181541	MAB21L2	0.0241933	mab-21-like 2 (C. elegans) [Source:HGNC Symbol;Acc:HGNC:6758]
ENSG00000252352	NA	0.0241951	Small nucleolar RNA SNORA40 [Source:RFAM;Acc:RF00561]
ENSG00000170006	TMEM154	0.0242932	transmembrane protein 154 [Source:HGNC Symbol;Acc:HGNC:26489]
ENSG00000165171	WBSCR27	0.0242967	Williams Beuren syndrome chromosome region 27 [Source:HGNC Symbol;Acc:HGNC:19068]
ENSG00000133627	ACTR3B	0.0243542	ARP3 actin-related protein 3 homolog B (yeast) [Source:HGNC Symbol;Acc:HGNC:17256]
ENSG00000171388	APLN	0.0243697	apelin [Source:HGNC Symbol;Acc:HGNC:16665]
ENSG00000181804	SLC9A9	0.0244148	solute carrier family 9, subfamily A (NHE9, cation proton antiporter 9), member 9 [Source:HGNC Symbol;Acc:HGNC:20653]
ENSG00000107954	NEURL1	0.0244232	neuralized E3 ubiquitin protein ligase 1 [Source:HGNC Symbol;Acc:HGNC:7761]
ENSG00000070047	PHRF1	0.0244728	PHD and ring finger domains 1 [Source:HGNC Symbol;Acc:HGNC:24351]
ENSG00000212623	RNU6-493P	0.024486	RNA, U6 small nuclear 493, pseudogene [Source:HGNC Symbol;Acc:HGNC:47456]
ENSG00000100216	TOMM22	0.0244969	translocase of outer mitochondrial membrane 22 homolog (yeast) [Source:HGNC Symbol;Acc:HGNC:18002]
ENSG00000155592	ZKSCAN2	0.0245117	zinc finger with KRAB and SCAN domains 2 [Source:HGNC Symbol;Acc:HGNC:25677]
ENSG00000149136	SSRP1	0.0245309	structure specific recognition protein 1 [Source:HGNC Symbol;Acc:HGNC:11327]
ENSG00000221673	NA	0.0245516	Small nucleolar RNA U3 [Source:RFAM;Acc:RF00012]
ENSG00000120526	NUDCD1	0.0245854	NudC domain containing 1 [Source:HGNC Symbol;Acc:HGNC:24306]
ENSG00000225774	SIRPAP1	0.0246005	signal-regulatory protein alpha pseudogene 1 [Source:HGNC Symbol;Acc:HGNC:9663]
ENSG00000133026	MYH10	0.0246119	myosin, heavy chain 10, non-muscle [Source:HGNC Symbol;Acc:HGNC:7568]
ENSG00000203795	FAM24A	0.0246193	family with sequence similarity 24, member A [Source:HGNC Symbol;Acc:HGNC:23470]
ENSG00000163161	ERCC3	0.0246404	excision repair cross-complementation group 3 [Source:HGNC Symbol;Acc:HGNC:3435]
ENSG00000185247	MAGEA11	0.0246439	melanoma antigen family A, 11 [Source:HGNC Symbol;Acc:HGNC:6798]
ENSG00000252449	RNU6-139P	0.0246759	RNA, U6 small nuclear 139, pseudogene [Source:HGNC Symbol;Acc:HGNC:47102]
ENSG00000010704	HFE	0.0247014	hemochromatosis [Source:HGNC Symbol;Acc:HGNC:4886]
ENSG00000169026	MFSD7	0.0247317	major facilitator superfamily domain containing 7 [Source:HGNC Symbol;Acc:HGNC:26177]
ENSG00000222890	RNU6-1068P	0.0247769	RNA, U6 small nuclear 1068, pseudogene [Source:HGNC Symbol;Acc:HGNC:48031]
ENSG00000183559	C10orf120	0.0248016	chromosome 10 open reading frame 120 [Source:HGNC Symbol;Acc:HGNC:25707]
ENSG00000047617	ANO2	0.0248082	anoctamin 2, calcium activated chloride channel [Source:HGNC Symbol;Acc:HGNC:1183]
ENSG00000123159	GIPC1	0.0248193	GIPC PDZ domain containing family, member 1 [Source:HGNC Symbol;Acc:HGNC:1226]
ENSG00000252991	RNU6-1073P	0.02484	RNA, U6 small nuclear 1073, pseudogene [Source:HGNC Symbol;Acc:HGNC:48036]
ENSG00000206960	RNU6-793P	0.0248561	RNA, U6 small nuclear 793, pseudogene [Source:HGNC Symbol;Acc:HGNC:47756]
ENSG00000169933	FRMPD4	0.0248643	FERM and PDZ domain containing 4 [Source:HGNC Symbol;Acc:HGNC:29007]
ENSG00000189079	ARID2	0.0248958	AT rich interactive domain 2 (ARID, RFX-like) [Source:HGNC Symbol;Acc:HGNC:18037]
ENSG00000124688	MAD2L1BP	0.0249051	MAD2L1 binding protein [Source:HGNC Symbol;Acc:HGNC:21059]
ENSG00000201358	RN7SKP193	0.0249087	RNA, 7SK small nuclear pseudogene 193 [Source:HGNC Symbol;Acc:HGNC:45917]
ENSG00000107186	MPDZ	0.0249135	multiple PDZ domain protein [Source:HGNC Symbol;Acc:HGNC:7208]
ENSG00000252735	RNU6-528P	0.0249183	RNA, U6 small nuclear 528, pseudogene [Source:HGNC Symbol;Acc:HGNC:47491]
ENSG00000151773	CCDC122	0.0249327	coiled-coil domain containing 122 [Source:HGNC Symbol;Acc:HGNC:26478]
ENSG00000176018	LYSMD3	0.0249788	LysM, putative peptidoglycan-binding, domain containing 3 [Source:HGNC Symbol;Acc:HGNC:26969]
ENSG00000171681	ATF7IP	0.024999	activating transcription factor 7 interacting protein [Source:HGNC Symbol;Acc:HGNC:20092]
ENSG00000259956	RBM15B	0.0250907	RNA binding motif protein 15B [Source:HGNC Symbol;Acc:HGNC:24303]
ENSG00000153936	HS2ST1	0.0251064	heparan sulfate 2-O-sulfotransferase 1 [Source:HGNC Symbol;Acc:HGNC:5193]
ENSG00000107882	SUFU	0.0251544	suppressor of fused homolog (Drosophila) [Source:HGNC Symbol;Acc:HGNC:16466]
ENSG00000129566	TEP1	0.0251829	telomerase-associated protein 1 [Source:HGNC Symbol;Acc:HGNC:11726]
ENSG00000111845	PAK1IP1	0.025188	PAK1 interacting protein 1 [Source:HGNC Symbol;Acc:HGNC:20882]
ENSG00000200197	RNU1-21P	0.0252525	RNA, U1 small nuclear 21, pseudogene [Source:HGNC Symbol;Acc:HGNC:41947]
ENSG00000118113	MMP8	0.0253118	matrix metallopeptidase 8 (neutrophil collagenase) [Source:HGNC Symbol;Acc:HGNC:7175]
ENSG00000155561	NUP205	0.025334	nucleoporin 205kDa [Source:HGNC Symbol;Acc:HGNC:18658]
ENSG00000148835	TAF5	0.02535	TAF5 RNA polymerase II, TATA box binding protein (TBP)-associated factor, 100kDa [Source:HGNC Symbol;Acc:HGNC:11539]
ENSG00000128585	MKLN1	0.0253527	muskelin 1, intracellular mediator containing kelch motifs [Source:HGNC Symbol;Acc:HGNC:7109]
ENSG00000205869	KRTAP5-1	0.0254129	keratin associated protein 5-1 [Source:HGNC Symbol;Acc:HGNC:23596]
ENSG00000105642	KCNN1	0.0254371	potassium intermediate/small conductance calcium-activated channel, subfamily N, member 1 [Source:HGNC Symbol;Acc:HGNC:6290]
ENSG00000182308	DCAF4L1	0.0255454	DDB1 and CUL4 associated factor 4-like 1 [Source:HGNC Symbol;Acc:HGNC:27723]
ENSG00000166224	SGPL1	0.025553	sphingosine-1-phosphate lyase 1 [Source:HGNC Symbol;Acc:HGNC:10817]
ENSG00000189377	CXCL17	0.0255641	chemokine (C-X-C motif) ligand 17 [Source:HGNC Symbol;Acc:HGNC:19232]
ENSG00000118849	RARRES1	0.025575	retinoic acid receptor responder (tazarotene induced) 1 [Source:HGNC Symbol;Acc:HGNC:9867]
ENSG00000252593	RNU6-1224P	0.0256522	RNA, U6 small nuclear 1224, pseudogene [Source:HGNC Symbol;Acc:HGNC:48187]
ENSG00000169762	TAPT1	0.0256557	transmembrane anterior posterior transformation 1 [Source:HGNC Symbol;Acc:HGNC:26887]
ENSG00000063015	SEZ6	0.0256826	seizure related 6 homolog (mouse) [Source:HGNC Symbol;Acc:HGNC:15955]
ENSG00000183684	ALYREF	0.0257191	Aly/REF export factor [Source:HGNC Symbol;Acc:HGNC:19071]
ENSG00000099957	P2RX6	0.0257691	purinergic receptor P2X, ligand-gated ion channel, 6 [Source:HGNC Symbol;Acc:HGNC:8538]
ENSG00000016602	CLCA4	0.0257751	chloride channel accessory 4 [Source:HGNC Symbol;Acc:HGNC:2018]
ENSG00000127993	RBM48	0.0258541	RNA binding motif protein 48 [Source:HGNC Symbol;Acc:HGNC:21785]
ENSG00000184451	CCR10	0.0258576	chemokine (C-C motif) receptor 10 [Source:HGNC Symbol;Acc:HGNC:4474]
ENSG00000228915	OR7E128P	0.025873	olfactory receptor, family 7, subfamily E, member 128 pseudogene [Source:HGNC Symbol;Acc:HGNC:15305]
ENSG00000201733	NA	0.0258796	Small nucleolar RNA SNORA43 [Source:RFAM;Acc:RF00416]
ENSG00000130363	RSPH3	0.0258825	radial spoke 3 homolog (Chlamydomonas) [Source:HGNC Symbol;Acc:HGNC:21054]
ENSG00000111361	EIF2B1	0.0258984	eukaryotic translation initiation factor 2B, subunit 1 alpha, 26kDa [Source:HGNC Symbol;Acc:HGNC:3257]
ENSG00000206746	RNU6-142P	0.0259105	RNA, U6 small nuclear 142, pseudogene [Source:HGNC Symbol;Acc:HGNC:47105]
ENSG00000145337	PYURF	0.025921	PIGY upstream reading frame [Source:HGNC Symbol;Acc:HGNC:44317]
ENSG00000115263	GCG	0.025945	glucagon [Source:HGNC Symbol;Acc:HGNC:4191]
ENSG00000165312	OTUD1	0.0259757	OTU deubiquitinase 1 [Source:HGNC Symbol;Acc:HGNC:27346]
ENSG00000228075	BOD1L2	0.0259854	biorientation of chromosomes in cell division 1-like 2 [Source:HGNC Symbol;Acc:HGNC:28505]
ENSG00000110002	VWA5A	0.026	von Willebrand factor A domain containing 5A [Source:HGNC Symbol;Acc:HGNC:6658]
ENSG00000197299	BLM	0.0260236	Bloom syndrome, RecQ helicase-like [Source:HGNC Symbol;Acc:HGNC:1058]
ENSG00000141429	GALNT1	0.0260555	polypeptide N-acetylgalactosaminyltransferase 1 [Source:HGNC Symbol;Acc:HGNC:4123]
ENSG00000196860	TOMM20L	0.0260672	translocase of outer mitochondrial membrane 20 homolog (yeast)-like [Source:HGNC Symbol;Acc:HGNC:33752]
ENSG00000067141	NEO1	0.0260779	neogenin 1 [Source:HGNC Symbol;Acc:HGNC:7754]
ENSG00000188334	BSPH1	0.0261199	binder of sperm protein homolog 1 [Source:HGNC Symbol;Acc:HGNC:33906]
ENSG00000141378	PTRH2	0.0261272	peptidyl-tRNA hydrolase 2 [Source:HGNC Symbol;Acc:HGNC:24265]
ENSG00000124713	GNMT	0.0261408	glycine N-methyltransferase [Source:HGNC Symbol;Acc:HGNC:4415]
ENSG00000104960	PTOV1	0.0261643	prostate tumor overexpressed 1 [Source:HGNC Symbol;Acc:HGNC:9632]
ENSG00000179912	R3HDM2	0.0261727	R3H domain containing 2 [Source:HGNC Symbol;Acc:HGNC:29167]
ENSG00000166603	MC4R	0.0261845	melanocortin 4 receptor [Source:HGNC Symbol;Acc:HGNC:6932]
ENSG00000206724	RNU6-756P	0.0261992	RNA, U6 small nuclear 756, pseudogene [Source:HGNC Symbol;Acc:HGNC:47719]
ENSG00000189320	FAM180A	0.0262111	family with sequence similarity 180, member A [Source:HGNC Symbol;Acc:HGNC:33773]
ENSG00000069702	TGFBR3	0.0262494	transforming growth factor, beta receptor III [Source:HGNC Symbol;Acc:HGNC:11774]
ENSG00000156466	GDF6	0.0262671	growth differentiation factor 6 [Source:HGNC Symbol;Acc:HGNC:4221]
ENSG00000200213	RNU6-992P	0.0262691	RNA, U6 small nuclear 992, pseudogene [Source:HGNC Symbol;Acc:HGNC:47955]
ENSG00000206592	NA	0.0262718	Small nucleolar RNA SNORA18 [Source:RFAM;Acc:RF00425]
ENSG00000143793	C1orf35	0.0262853	chromosome 1 open reading frame 35 [Source:HGNC Symbol;Acc:HGNC:19032]
ENSG00000188735	TMEM120B	0.0262892	transmembrane protein 120B [Source:HGNC Symbol;Acc:HGNC:32008]
ENSG00000141437	SLC25A52	0.0263073	solute carrier family 25, member 52 [Source:HGNC Symbol;Acc:HGNC:23324]
ENSG00000174527	MYO1H	0.0263119	myosin IH [Source:HGNC Symbol;Acc:HGNC:13879]
ENSG00000101104	PABPC1L	0.0263349	poly(A) binding protein, cytoplasmic 1-like [Source:HGNC Symbol;Acc:HGNC:15797]
ENSG00000197712	FAM114A1	0.0263543	family with sequence similarity 114, member A1 [Source:HGNC Symbol;Acc:HGNC:25087]
ENSG00000201749	NA	0.0263802	Y RNA [Source:RFAM;Acc:RF00019]
ENSG00000280278	NA	0.0264554	uncharacterized protein FLJ30679 [Source:EntrezGene;Acc:146512]
ENSG00000187855	ASCL4	0.0265085	achaete-scute family bHLH transcription factor 4 [Source:HGNC Symbol;Acc:HGNC:24311]
ENSG00000165959	CLMN	0.0266538	calmin (calponin-like, transmembrane) [Source:HGNC Symbol;Acc:HGNC:19972]
ENSG00000128218	VPREB3	0.0268099	pre-B lymphocyte 3 [Source:HGNC Symbol;Acc:HGNC:12710]
ENSG00000251711	RNU6-632P	0.0268408	RNA, U6 small nuclear 632, pseudogene [Source:HGNC Symbol;Acc:HGNC:47595]
ENSG00000176022	B3GALT6	0.0268558	UDP-Gal:betaGal beta 1,3-galactosyltransferase polypeptide 6 [Source:HGNC Symbol;Acc:HGNC:17978]
ENSG00000009335	UBE3C	0.0268936	ubiquitin protein ligase E3C [Source:HGNC Symbol;Acc:HGNC:16803]
ENSG00000171017	LRRC8E	0.0268938	leucine rich repeat containing 8 family, member E [Source:HGNC Symbol;Acc:HGNC:26272]
ENSG00000261239	ANKRD26P1	0.0268942	ankyrin repeat domain 26 pseudogene 1 [Source:HGNC Symbol;Acc:HGNC:32955]
ENSG00000185721	DRG1	0.0269217	developmentally regulated GTP binding protein 1 [Source:HGNC Symbol;Acc:HGNC:3029]
ENSG00000142444	C19orf52	0.026939	chromosome 19 open reading frame 52 [Source:HGNC Symbol;Acc:HGNC:25152]
ENSG00000169064	ZBBX	0.0269448	zinc finger, B-box domain containing [Source:HGNC Symbol;Acc:HGNC:26245]
ENSG00000101282	RSPO4	0.0269508	R-spondin 4 [Source:HGNC Symbol;Acc:HGNC:16175]
ENSG00000224557	HLA-DPB2	0.0269566	major histocompatibility complex, class II, DP beta 2 (pseudogene) [Source:HGNC Symbol;Acc:HGNC:4941]
ENSG00000243437	RN7SL370P	0.0269796	RNA, 7SL, cytoplasmic 370, pseudogene [Source:HGNC Symbol;Acc:HGNC:46386]
ENSG00000121933	ADORA3	0.0269946	adenosine A3 receptor [Source:HGNC Symbol;Acc:HGNC:268]
ENSG00000172742	OR4D9	0.0270367	olfactory receptor, family 4, subfamily D, member 9 [Source:HGNC Symbol;Acc:HGNC:15178]
ENSG00000109771	LRP2BP	0.0270604	LRP2 binding protein [Source:HGNC Symbol;Acc:HGNC:25434]
ENSG00000230655	OR7E55P	0.027062	olfactory receptor, family 7, subfamily E, member 55 pseudogene [Source:HGNC Symbol;Acc:HGNC:8430]
ENSG00000174021	GNG5	0.0270644	guanine nucleotide binding protein (G protein), gamma 5 [Source:HGNC Symbol;Acc:HGNC:4408]
ENSG00000006042	TMEM98	0.0271818	transmembrane protein 98 [Source:HGNC Symbol;Acc:HGNC:24529]
ENSG00000146276	GABRR1	0.0272374	gamma-aminobutyric acid (GABA) A receptor, rho 1 [Source:HGNC Symbol;Acc:HGNC:4090]
ENSG00000206177	HBM	0.0272486	hemoglobin, mu [Source:HGNC Symbol;Acc:HGNC:4826]
ENSG00000187051	RPS19BP1	0.0272643	ribosomal protein S19 binding protein 1 [Source:HGNC Symbol;Acc:HGNC:28749]
ENSG00000136052	SLC41A2	0.0272919	solute carrier family 41 (magnesium transporter), member 2 [Source:HGNC Symbol;Acc:HGNC:31045]
ENSG00000115806	GORASP2	0.0273044	golgi reassembly stacking protein 2, 55kDa [Source:HGNC Symbol;Acc:HGNC:17500]
ENSG00000184814	PRR23B	0.0273264	proline rich 23B [Source:HGNC Symbol;Acc:HGNC:33764]
ENSG00000124302	CHST8	0.0273758	carbohydrate (N-acetylgalactosamine 4-0) sulfotransferase 8 [Source:HGNC Symbol;Acc:HGNC:15993]
ENSG00000138722	MMRN1	0.0273849	multimerin 1 [Source:HGNC Symbol;Acc:HGNC:7178]
ENSG00000149929	HIRIP3	0.0274221	HIRA interacting protein 3 [Source:HGNC Symbol;Acc:HGNC:4917]
ENSG00000115947	ORC4	0.0275343	origin recognition complex, subunit 4 [Source:HGNC Symbol;Acc:HGNC:8490]
ENSG00000185875	THNSL1	0.0275595	threonine synthase-like 1 (S. cerevisiae) [Source:HGNC Symbol;Acc:HGNC:26160]
ENSG00000133027	PEMT	0.0275787	phosphatidylethanolamine N-methyltransferase [Source:HGNC Symbol;Acc:HGNC:8830]
ENSG00000181894	ZNF329	0.0276092	zinc finger protein 329 [Source:HGNC Symbol;Acc:HGNC:14209]
ENSG00000184155	OR10J5	0.0276327	olfactory receptor, family 10, subfamily J, member 5 [Source:HGNC Symbol;Acc:HGNC:14993]
ENSG00000196224	KRTAP5-3	0.027666	keratin associated protein 5-3 [Source:HGNC Symbol;Acc:HGNC:23598]
ENSG00000206900	RNU6-98P	0.0276661	RNA, U6 small nuclear 98, pseudogene [Source:HGNC Symbol;Acc:HGNC:47061]
ENSG00000113100	CDH9	0.0277126	cadherin 9, type 2 (T1-cadherin) [Source:HGNC Symbol;Acc:HGNC:1768]
ENSG00000179477	ALOX12B	0.0277354	arachidonate 12-lipoxygenase, 12R type [Source:HGNC Symbol;Acc:HGNC:430]
ENSG00000112981	NME5	0.0277467	NME/NM23 family member 5 [Source:HGNC Symbol;Acc:HGNC:7853]
ENSG00000198881	ASB12	0.0277509	ankyrin repeat and SOCS box containing 12 [Source:HGNC Symbol;Acc:HGNC:19763]
ENSG00000137821	LRRC49	0.0277852	leucine rich repeat containing 49 [Source:HGNC Symbol;Acc:HGNC:25965]
ENSG00000169410	PTPN9	0.0277858	protein tyrosine phosphatase, non-receptor type 9 [Source:HGNC Symbol;Acc:HGNC:9661]
ENSG00000141504	SAT2	0.0278625	spermidine/spermine N1-acetyltransferase family member 2 [Source:HGNC Symbol;Acc:HGNC:23160]
ENSG00000106003	LFNG	0.0278642	LFNG O-fucosylpeptide 3-beta-N-acetylglucosaminyltransferase [Source:HGNC Symbol;Acc:HGNC:6560]
ENSG00000188828	GLRA4	0.0278707	glycine receptor, alpha 4 [Source:HGNC Symbol;Acc:HGNC:31715]
ENSG00000156603	MED19	0.027883	mediator complex subunit 19 [Source:HGNC Symbol;Acc:HGNC:29600]
ENSG00000142973	CYP4B1	0.0279296	cytochrome P450, family 4, subfamily B, polypeptide 1 [Source:HGNC Symbol;Acc:HGNC:2644]
ENSG00000062485	CS	0.0279357	citrate synthase [Source:HGNC Symbol;Acc:HGNC:2422]
ENSG00000164930	FZD6	0.0279484	frizzled class receptor 6 [Source:HGNC Symbol;Acc:HGNC:4044]
ENSG00000136802	LRRC8A	0.0280039	leucine rich repeat containing 8 family, member A [Source:HGNC Symbol;Acc:HGNC:19027]
ENSG00000167193	CRK	0.0280106	v-crk avian sarcoma virus CT10 oncogene homolog [Source:HGNC Symbol;Acc:HGNC:2362]
ENSG00000156042	TTC18	0.0280369	tetratricopeptide repeat domain 18 [Source:HGNC Symbol;Acc:HGNC:30726]
ENSG00000015171	ZMYND11	0.0280809	zinc finger, MYND-type containing 11 [Source:HGNC Symbol;Acc:HGNC:16966]
ENSG00000182346	DAOA	0.0280826	D-amino acid oxidase activator [Source:HGNC Symbol;Acc:HGNC:21191]
ENSG00000244624	KRTAP20-1	0.0281025	keratin associated protein 20-1 [Source:HGNC Symbol;Acc:HGNC:18943]
ENSG00000069399	BCL3	0.0281498	B-cell CLL/lymphoma 3 [Source:HGNC Symbol;Acc:HGNC:998]
ENSG00000123609	NMI	0.0281768	N-myc (and STAT) interactor [Source:HGNC Symbol;Acc:HGNC:7854]
ENSG00000075234	TTC38	0.028208	tetratricopeptide repeat domain 38 [Source:HGNC Symbol;Acc:HGNC:26082]
ENSG00000100030	MAPK1	0.0282319	mitogen-activated protein kinase 1 [Source:HGNC Symbol;Acc:HGNC:6871]
ENSG00000205643	CDPF1	0.0282332	cysteine-rich, DPF motif domain containing 1 [Source:HGNC Symbol;Acc:HGNC:33710]
ENSG00000196151	WDSUB1	0.028246	WD repeat, sterile alpha motif and U-box domain containing 1 [Source:HGNC Symbol;Acc:HGNC:26697]
ENSG00000180053	NKX2-6	0.0282709	NK2 homeobox 6 [Source:HGNC Symbol;Acc:HGNC:32940]
ENSG00000251192	ZNF674	0.0282766	zinc finger protein 674 [Source:HGNC Symbol;Acc:HGNC:17625]
ENSG00000164830	OXR1	0.0283105	oxidation resistance 1 [Source:HGNC Symbol;Acc:HGNC:15822]
ENSG00000167779	IGFBP6	0.0283389	insulin-like growth factor binding protein 6 [Source:HGNC Symbol;Acc:HGNC:5475]
ENSG00000171703	TCEA2	0.0283702	transcription elongation factor A (SII), 2 [Source:HGNC Symbol;Acc:HGNC:11614]
ENSG00000124571	XPO5	0.0284073	exportin 5 [Source:HGNC Symbol;Acc:HGNC:17675]
ENSG00000093134	VNN3	0.0284302	vanin 3 [Source:HGNC Symbol;Acc:HGNC:16431]
ENSG00000172247	C1QTNF4	0.0284507	C1q and tumor necrosis factor related protein 4 [Source:HGNC Symbol;Acc:HGNC:14346]
ENSG00000135525	MAP7	0.0284596	microtubule-associated protein 7 [Source:HGNC Symbol;Acc:HGNC:6869]
ENSG00000110172	CHORDC1	0.0285351	cysteine and histidine-rich domain (CHORD) containing 1 [Source:HGNC Symbol;Acc:HGNC:14525]
ENSG00000185974	GRK1	0.0285519	G protein-coupled receptor kinase 1 [Source:HGNC Symbol;Acc:HGNC:10013]
ENSG00000175229	GAL3ST3	0.0285696	galactose-3-O-sulfotransferase 3 [Source:HGNC Symbol;Acc:HGNC:24144]
ENSG00000254469	NA	0.0285862	Putative short transient receptor potential channel 2-like protein [Source:UniProtKB/Swiss-Prot;Acc:Q6ZNB5]
ENSG00000160710	ADAR	0.0286069	adenosine deaminase, RNA-specific [Source:HGNC Symbol;Acc:HGNC:225]
ENSG00000159723	AGRP	0.0286379	agouti related neuropeptide [Source:HGNC Symbol;Acc:HGNC:330]
ENSG00000198108	CHSY3	0.0286796	chondroitin sulfate synthase 3 [Source:HGNC Symbol;Acc:HGNC:24293]
ENSG00000007062	PROM1	0.0286827	prominin 1 [Source:HGNC Symbol;Acc:HGNC:9454]
ENSG00000127616	SMARCA4	0.0286972	SWI/SNF related, matrix associated, actin dependent regulator of chromatin, subfamily a, member 4 [Source:HGNC Symbol;Acc:HGNC:11100]
ENSG00000197302	ZNF720	0.0287389	zinc finger protein 720 [Source:HGNC Symbol;Acc:HGNC:26987]
ENSG00000241598	KRTAP5-4	0.0288956	keratin associated protein 5-4 [Source:HGNC Symbol;Acc:HGNC:23599]
ENSG00000188997	KCTD21	0.0289183	potassium channel tetramerization domain containing 21 [Source:HGNC Symbol;Acc:HGNC:27452]
ENSG00000202339	RNU4-45P	0.0290803	RNA, U4 small nuclear 45, pseudogene [Source:HGNC Symbol;Acc:HGNC:46981]
ENSG00000116539	ASH1L	0.0290935	ash1 (absent, small, or homeotic)-like (Drosophila) [Source:HGNC Symbol;Acc:HGNC:19088]
ENSG00000007168	PAFAH1B1	0.0291029	platelet-activating factor acetylhydrolase 1b, regulatory subunit 1 (45kDa) [Source:HGNC Symbol;Acc:HGNC:8574]
ENSG00000238493	RNU6-221P	0.0291089	RNA, U6 small nuclear 221, pseudogene [Source:HGNC Symbol;Acc:HGNC:47184]
ENSG00000196503	ARL9	0.0291423	ADP-ribosylation factor-like 9 [Source:HGNC Symbol;Acc:HGNC:23592]
ENSG00000139344	AMDHD1	0.0291648	amidohydrolase domain containing 1 [Source:HGNC Symbol;Acc:HGNC:28577]
ENSG00000157778	PSMG3	0.029169	proteasome (prosome, macropain) assembly chaperone 3 [Source:HGNC Symbol;Acc:HGNC:22420]
ENSG00000183783	KCTD8	0.0291893	potassium channel tetramerization domain containing 8 [Source:HGNC Symbol;Acc:HGNC:22394]
ENSG00000143867	OSR1	0.0291912	odd-skipped related transciption factor 1 [Source:HGNC Symbol;Acc:HGNC:8111]
ENSG00000184571	PIWIL3	0.0292383	piwi-like RNA-mediated gene silencing 3 [Source:HGNC Symbol;Acc:HGNC:18443]
ENSG00000175467	SART1	0.0292592	squamous cell carcinoma antigen recognized by T cells [Source:HGNC Symbol;Acc:HGNC:10538]
ENSG00000182816	KRTAP13-2	0.0292645	keratin associated protein 13-2 [Source:HGNC Symbol;Acc:HGNC:18923]
ENSG00000136044	APPL2	0.0293084	adaptor protein, phosphotyrosine interaction, PH domain and leucine zipper containing 2 [Source:HGNC Symbol;Acc:HGNC:18242]
ENSG00000179443	OR13C6P	0.0293313	olfactory receptor, family 13, subfamily C, member 6 pseudogene [Source:HGNC Symbol;Acc:HGNC:15101]
ENSG00000067798	NAV3	0.0293759	neuron navigator 3 [Source:HGNC Symbol;Acc:HGNC:15998]
ENSG00000111961	SASH1	0.0294034	SAM and SH3 domain containing 1 [Source:HGNC Symbol;Acc:HGNC:19182]
ENSG00000170279	C7orf33	0.029429	chromosome 7 open reading frame 33 [Source:HGNC Symbol;Acc:HGNC:21724]
ENSG00000115556	PLCD4	0.02943	phospholipase C, delta 4 [Source:HGNC Symbol;Acc:HGNC:9062]
ENSG00000100897	DCAF11	0.0295124	DDB1 and CUL4 associated factor 11 [Source:HGNC Symbol;Acc:HGNC:20258]
ENSG00000177663	IL17RA	0.0295129	interleukin 17 receptor A [Source:HGNC Symbol;Acc:HGNC:5985]
ENSG00000169860	P2RY1	0.0295422	purinergic receptor P2Y, G-protein coupled, 1 [Source:HGNC Symbol;Acc:HGNC:8539]
ENSG00000196233	LCOR	0.0295528	ligand dependent nuclear receptor corepressor [Source:HGNC Symbol;Acc:HGNC:29503]
ENSG00000180992	MRPL14	0.0295652	mitochondrial ribosomal protein L14 [Source:HGNC Symbol;Acc:HGNC:14279]
ENSG00000176371	ZSCAN2	0.0295676	zinc finger and SCAN domain containing 2 [Source:HGNC Symbol;Acc:HGNC:20994]
ENSG00000159199	ATP5G1	0.0295687	ATP synthase, H+ transporting, mitochondrial Fo complex, subunit C1 (subunit 9) [Source:HGNC Symbol;Acc:HGNC:841]
ENSG00000197408	CYP2B6	0.0295996	cytochrome P450, family 2, subfamily B, polypeptide 6 [Source:HGNC Symbol;Acc:HGNC:2615]
ENSG00000134504	KCTD1	0.0296056	potassium channel tetramerization domain containing 1 [Source:HGNC Symbol;Acc:HGNC:18249]
ENSG00000206998	NA	0.0296098	Y RNA [Source:RFAM;Acc:RF00019]
ENSG00000121542	SEC22A	0.0296296	SEC22 vesicle trafficking protein homolog A (S. cerevisiae) [Source:HGNC Symbol;Acc:HGNC:20260]
ENSG00000078043	PIAS2	0.0296844	protein inhibitor of activated STAT, 2 [Source:HGNC Symbol;Acc:HGNC:17311]
ENSG00000126107	HECTD3	0.0296918	HECT domain containing E3 ubiquitin protein ligase 3 [Source:HGNC Symbol;Acc:HGNC:26117]
ENSG00000143486	EIF2D	0.0297106	eukaryotic translation initiation factor 2D [Source:HGNC Symbol;Acc:HGNC:6583]
ENSG00000164299	SPZ1	0.0297612	spermatogenic leucine zipper 1 [Source:HGNC Symbol;Acc:HGNC:30721]
ENSG00000183977	PP2D1	0.0297931	protein phosphatase 2C-like domain containing 1 [Source:HGNC Symbol;Acc:HGNC:28406]
ENSG00000222524	RN7SKP109	0.0297968	RNA, 7SK small nuclear pseudogene 109 [Source:HGNC Symbol;Acc:HGNC:45833]
ENSG00000183019	MCEMP1	0.0298178	mast cell-expressed membrane protein 1 [Source:HGNC Symbol;Acc:HGNC:27291]
ENSG00000155329	ZCCHC10	0.0298413	zinc finger, CCHC domain containing 10 [Source:HGNC Symbol;Acc:HGNC:25954]
ENSG00000178026	LRRC75B	0.0298596	leucine rich repeat containing 75B [Source:HGNC Symbol;Acc:HGNC:33155]
ENSG00000198258	UBL5	0.0298799	ubiquitin-like 5 [Source:HGNC Symbol;Acc:HGNC:13736]
ENSG00000131943	C19orf12	0.0298811	chromosome 19 open reading frame 12 [Source:HGNC Symbol;Acc:HGNC:25443]
ENSG00000187595	ZNF385C	0.0299015	zinc finger protein 385C [Source:HGNC Symbol;Acc:HGNC:33722]
ENSG00000143147	GPR161	0.0299949	G protein-coupled receptor 161 [Source:HGNC Symbol;Acc:HGNC:23694]
ENSG00000164879	CA3	0.0300051	carbonic anhydrase III, muscle specific [Source:HGNC Symbol;Acc:HGNC:1374]
ENSG00000221375	RNU6ATAC23P	0.0300315	RNA, U6atac small nuclear 23, pseudogene [Source:HGNC Symbol;Acc:HGNC:46922]
ENSG00000128567	PODXL	0.030054	podocalyxin-like [Source:HGNC Symbol;Acc:HGNC:9171]
ENSG00000158270	COLEC12	0.03006	collectin sub-family member 12 [Source:HGNC Symbol;Acc:HGNC:16016]
ENSG00000227124	ZNF717	0.0300743	zinc finger protein 717 [Source:HGNC Symbol;Acc:HGNC:29448]
ENSG00000083807	SLC27A5	0.0300996	solute carrier family 27 (fatty acid transporter), member 5 [Source:HGNC Symbol;Acc:HGNC:10999]
ENSG00000156983	BRPF1	0.0301349	bromodomain and PHD finger containing, 1 [Source:HGNC Symbol;Acc:HGNC:14255]
ENSG00000196305	IARS	0.0301625	isoleucyl-tRNA synthetase [Source:HGNC Symbol;Acc:HGNC:5330]
ENSG00000231169	EEF1B2P1	0.0301667	eukaryotic translation elongation factor 1 beta 2 pseudogene 1 [Source:HGNC Symbol;Acc:HGNC:3207]
ENSG00000156639	ZFAND3	0.0302342	zinc finger, AN1-type domain 3 [Source:HGNC Symbol;Acc:HGNC:18019]
ENSG00000164403	SHROOM1	0.0302769	shroom family member 1 [Source:HGNC Symbol;Acc:HGNC:24084]
ENSG00000189186	DCAF8L2	0.0303211	DDB1 and CUL4 associated factor 8-like 2 [Source:HGNC Symbol;Acc:HGNC:31811]
ENSG00000179676	LINC00305	0.0303413	long intergenic non-protein coding RNA 305 [Source:HGNC Symbol;Acc:HGNC:28597]
ENSG00000121022	COPS5	0.0303512	COP9 signalosome subunit 5 [Source:HGNC Symbol;Acc:HGNC:2240]
ENSG00000160055	TMEM234	0.0304051	transmembrane protein 234 [Source:HGNC Symbol;Acc:HGNC:28837]
ENSG00000183249	NF1P3	0.0304202	neurofibromin 1 pseudogene 3 [Source:HGNC Symbol;Acc:HGNC:7766]
ENSG00000138075	ABCG5	0.0304635	ATP-binding cassette, sub-family G (WHITE), member 5 [Source:HGNC Symbol;Acc:HGNC:13886]
ENSG00000133943	C14orf159	0.0305137	chromosome 14 open reading frame 159 [Source:HGNC Symbol;Acc:HGNC:20498]
ENSG00000168619	ADAM18	0.0305192	ADAM metallopeptidase domain 18 [Source:HGNC Symbol;Acc:HGNC:196]
ENSG00000252470	RNU6-551P	0.0305517	RNA, U6 small nuclear 551, pseudogene [Source:HGNC Symbol;Acc:HGNC:47514]
ENSG00000060971	ACAA1	0.0305527	acetyl-CoA acyltransferase 1 [Source:HGNC Symbol;Acc:HGNC:82]
ENSG00000114784	EIF1B	0.030589	eukaryotic translation initiation factor 1B [Source:HGNC Symbol;Acc:HGNC:30792]
ENSG00000187554	TLR5	0.0305956	toll-like receptor 5 [Source:HGNC Symbol;Acc:HGNC:11851]
ENSG00000145782	ATG12	0.0306042	autophagy related 12 [Source:HGNC Symbol;Acc:HGNC:588]
ENSG00000134602	NA	0.0306248	Serine/threonine-protein kinase MST4 [Source:UniProtKB/Swiss-Prot;Acc:Q9P289]
ENSG00000253047	NA	0.0306772	Small nucleolar RNA SNORA40 [Source:RFAM;Acc:RF00561]
ENSG00000252935	RNU6-1220P	0.0306957	RNA, U6 small nuclear 1220, pseudogene [Source:HGNC Symbol;Acc:HGNC:48183]
ENSG00000139974	SLC38A6	0.0307429	solute carrier family 38, member 6 [Source:HGNC Symbol;Acc:HGNC:19863]
ENSG00000167371	PRRT2	0.030746	proline-rich transmembrane protein 2 [Source:HGNC Symbol;Acc:HGNC:30500]
ENSG00000182670	TTC3	0.0307938	tetratricopeptide repeat domain 3 [Source:HGNC Symbol;Acc:HGNC:12393]
ENSG00000160799	CCDC12	0.0307984	coiled-coil domain containing 12 [Source:HGNC Symbol;Acc:HGNC:28332]
ENSG00000124249	KCNK15	0.0308147	potassium channel, subfamily K, member 15 [Source:HGNC Symbol;Acc:HGNC:13814]
ENSG00000200138	RNY1P10	0.0308814	RNA, Ro-associated Y1 pseudogene 10 [Source:HGNC Symbol;Acc:HGNC:50873]
ENSG00000125650	PSPN	0.0308837	persephin [Source:HGNC Symbol;Acc:HGNC:9579]
ENSG00000207558	MIR487A	0.0309172	microRNA 487a [Source:HGNC Symbol;Acc:HGNC:32343]
ENSG00000176485	PLA2G16	0.0309225	phospholipase A2, group XVI [Source:HGNC Symbol;Acc:HGNC:17825]
ENSG00000082641	NFE2L1	0.0309375	nuclear factor, erythroid 2-like 1 [Source:HGNC Symbol;Acc:HGNC:7781]
ENSG00000160094	ZNF362	0.030939	zinc finger protein 362 [Source:HGNC Symbol;Acc:HGNC:18079]
ENSG00000204764	RANBP17	0.0309543	RAN binding protein 17 [Source:HGNC Symbol;Acc:HGNC:14428]
ENSG00000252963	RN7SKP147	0.0309596	RNA, 7SK small nuclear pseudogene 147 [Source:HGNC Symbol;Acc:HGNC:45871]
ENSG00000107614	TRDMT1	0.0309633	tRNA aspartic acid methyltransferase 1 [Source:HGNC Symbol;Acc:HGNC:2977]
ENSG00000074047	GLI2	0.0309915	GLI family zinc finger 2 [Source:HGNC Symbol;Acc:HGNC:4318]
ENSG00000108187	PBLD	0.0309991	phenazine biosynthesis-like protein domain containing [Source:HGNC Symbol;Acc:HGNC:23301]
ENSG00000137310	TCF19	0.0310105	transcription factor 19 [Source:HGNC Symbol;Acc:HGNC:11629]
ENSG00000157514	TSC22D3	0.0310258	TSC22 domain family, member 3 [Source:HGNC Symbol;Acc:HGNC:3051]
ENSG00000122203	KIAA1191	0.0310515	KIAA1191 [Source:HGNC Symbol;Acc:HGNC:29209]
ENSG00000138395	CDK15	0.0310795	cyclin-dependent kinase 15 [Source:HGNC Symbol;Acc:HGNC:14434]
ENSG00000202041	NA	0.0311227	Y RNA [Source:RFAM;Acc:RF00019]
ENSG00000165626	BEND7	0.031124	BEN domain containing 7 [Source:HGNC Symbol;Acc:HGNC:23514]
ENSG00000111596	CNOT2	0.0311861	CCR4-NOT transcription complex, subunit 2 [Source:HGNC Symbol;Acc:HGNC:7878]
ENSG00000222721	RN7SKP188	0.0312356	RNA, 7SK small nuclear pseudogene 188 [Source:HGNC Symbol;Acc:HGNC:45912]
ENSG00000117009	KMO	0.0312403	kynurenine 3-monooxygenase (kynurenine 3-hydroxylase) [Source:HGNC Symbol;Acc:HGNC:6381]
ENSG00000141219	C17orf80	0.0312583	chromosome 17 open reading frame 80 [Source:HGNC Symbol;Acc:HGNC:29601]
ENSG00000106692	FKTN	0.0312727	fukutin [Source:HGNC Symbol;Acc:HGNC:3622]
ENSG00000177363	LRRN4CL	0.0312951	LRRN4 C-terminal like [Source:HGNC Symbol;Acc:HGNC:33724]
ENSG00000123838	C4BPA	0.0313422	complement component 4 binding protein, alpha [Source:HGNC Symbol;Acc:HGNC:1325]
ENSG00000222209	RNA5SP56	0.031379	RNA, 5S ribosomal pseudogene 56 [Source:HGNC Symbol;Acc:HGNC:42833]
ENSG00000171174	RBKS	0.0313874	ribokinase [Source:HGNC Symbol;Acc:HGNC:30325]
ENSG00000130988	RGN	0.031416	regucalcin [Source:HGNC Symbol;Acc:HGNC:9989]
ENSG00000196865	NHLRC2	0.031417	NHL repeat containing 2 [Source:HGNC Symbol;Acc:HGNC:24731]
ENSG00000183230	CTNNA3	0.0314517	catenin (cadherin-associated protein), alpha 3 [Source:HGNC Symbol;Acc:HGNC:2511]
ENSG00000011198	ABHD5	0.0314607	abhydrolase domain containing 5 [Source:HGNC Symbol;Acc:HGNC:21396]
ENSG00000187097	ENTPD5	0.0314951	ectonucleoside triphosphate diphosphohydrolase 5 [Source:HGNC Symbol;Acc:HGNC:3367]
ENSG00000087269	NOP14	0.0315054	NOP14 nucleolar protein [Source:HGNC Symbol;Acc:HGNC:16821]
ENSG00000161921	CXCL16	0.0315164	chemokine (C-X-C motif) ligand 16 [Source:HGNC Symbol;Acc:HGNC:16642]
ENSG00000149260	CAPN5	0.0315388	calpain 5 [Source:HGNC Symbol;Acc:HGNC:1482]
ENSG00000200600	NA	0.0315572	Y RNA [Source:RFAM;Acc:RF00019]
ENSG00000066739	ATG2B	0.031656	autophagy related 2B [Source:HGNC Symbol;Acc:HGNC:20187]
ENSG00000165832	TRUB1	0.0316602	TruB pseudouridine (psi) synthase family member 1 [Source:HGNC Symbol;Acc:HGNC:16060]
ENSG00000266274	RN7SL138P	0.0316692	RNA, 7SL, cytoplasmic 138, pseudogene [Source:HGNC Symbol;Acc:HGNC:46154]
ENSG00000105750	ZNF85	0.0317277	zinc finger protein 85 [Source:HGNC Symbol;Acc:HGNC:13160]
ENSG00000163923	RPL39L	0.0317889	ribosomal protein L39-like [Source:HGNC Symbol;Acc:HGNC:17094]
ENSG00000101473	ACOT8	0.0317897	acyl-CoA thioesterase 8 [Source:HGNC Symbol;Acc:HGNC:15919]
ENSG00000162729	IGSF8	0.0318086	immunoglobulin superfamily, member 8 [Source:HGNC Symbol;Acc:HGNC:17813]
ENSG00000146047	HIST1H2BA	0.0318209	histone cluster 1, H2ba [Source:HGNC Symbol;Acc:HGNC:18730]
ENSG00000166734	CASC4	0.0318299	cancer susceptibility candidate 4 [Source:HGNC Symbol;Acc:HGNC:24892]
ENSG00000198821	CD247	0.031859	CD247 molecule [Source:HGNC Symbol;Acc:HGNC:1677]
ENSG00000139629	GALNT6	0.031862	polypeptide N-acetylgalactosaminyltransferase 6 [Source:HGNC Symbol;Acc:HGNC:4128]
ENSG00000131844	MCCC2	0.031868	methylcrotonoyl-CoA carboxylase 2 (beta) [Source:HGNC Symbol;Acc:HGNC:6937]
ENSG00000119922	IFIT2	0.0318694	interferon-induced protein with tetratricopeptide repeats 2 [Source:HGNC Symbol;Acc:HGNC:5409]
ENSG00000137251	TINAG	0.0319045	tubulointerstitial nephritis antigen [Source:HGNC Symbol;Acc:HGNC:14599]
ENSG00000070808	CAMK2A	0.0319291	calcium/calmodulin-dependent protein kinase II alpha [Source:HGNC Symbol;Acc:HGNC:1460]
ENSG00000179564	LSMEM2	0.0319377	leucine-rich single-pass membrane protein 2 [Source:HGNC Symbol;Acc:HGNC:26781]
ENSG00000083635	NUFIP1	0.0319632	nuclear fragile X mental retardation protein interacting protein 1 [Source:HGNC Symbol;Acc:HGNC:8057]
ENSG00000176302	FOXR1	0.0319737	forkhead box R1 [Source:HGNC Symbol;Acc:HGNC:29980]
ENSG00000223321	RN7SKP293	0.032003	RNA, 7SK small nuclear pseudogene 293 [Source:HGNC Symbol;Acc:HGNC:46017]
ENSG00000174371	EXO1	0.0320346	exonuclease 1 [Source:HGNC Symbol;Acc:HGNC:3511]
ENSG00000112081	SRSF3	0.0320567	serine/arginine-rich splicing factor 3 [Source:HGNC Symbol;Acc:HGNC:10785]
ENSG00000100814	CCNB1IP1	0.0321016	cyclin B1 interacting protein 1, E3 ubiquitin protein ligase [Source:HGNC Symbol;Acc:HGNC:19437]
ENSG00000078053	AMPH	0.0321155	amphiphysin [Source:HGNC Symbol;Acc:HGNC:471]
ENSG00000100626	GALNT16	0.0321208	polypeptide N-acetylgalactosaminyltransferase 16 [Source:HGNC Symbol;Acc:HGNC:23233]
ENSG00000189180	ZNF33A	0.0321431	zinc finger protein 33A [Source:HGNC Symbol;Acc:HGNC:13096]
ENSG00000137265	IRF4	0.0321444	interferon regulatory factor 4 [Source:HGNC Symbol;Acc:HGNC:6119]
ENSG00000173077	DEC1	0.0321492	deleted in esophageal cancer 1 [Source:HGNC Symbol;Acc:HGNC:23658]
ENSG00000273975	NA	0.032165	Metazoan signal recognition particle RNA [Source:RFAM;Acc:RF00017]
ENSG00000172717	FAM71D	0.0321719	family with sequence similarity 71, member D [Source:HGNC Symbol;Acc:HGNC:20101]
ENSG00000163291	PAQR3	0.0322356	progestin and adipoQ receptor family member III [Source:HGNC Symbol;Acc:HGNC:30130]
ENSG00000105248	CCDC94	0.0322613	coiled-coil domain containing 94 [Source:HGNC Symbol;Acc:HGNC:25518]
ENSG00000111144	LTA4H	0.0322634	leukotriene A4 hydrolase [Source:HGNC Symbol;Acc:HGNC:6710]
ENSG00000130827	PLXNA3	0.0322902	plexin A3 [Source:HGNC Symbol;Acc:HGNC:9101]
ENSG00000153162	BMP6	0.0323076	bone morphogenetic protein 6 [Source:HGNC Symbol;Acc:HGNC:1073]
ENSG00000076321	KLHL20	0.0323511	kelch-like family member 20 [Source:HGNC Symbol;Acc:HGNC:25056]
ENSG00000106686	SPATA6L	0.0323536	spermatogenesis associated 6-like [Source:HGNC Symbol;Acc:HGNC:25472]
ENSG00000182575	NXPH3	0.0323597	neurexophilin 3 [Source:HGNC Symbol;Acc:HGNC:8077]
ENSG00000110435	PDHX	0.0324139	pyruvate dehydrogenase complex, component X [Source:HGNC Symbol;Acc:HGNC:21350]
ENSG00000149634	SPATA25	0.0324363	spermatogenesis associated 25 [Source:HGNC Symbol;Acc:HGNC:16158]
ENSG00000119523	ALG2	0.0324524	ALG2, alpha-1,3/1,6-mannosyltransferase [Source:HGNC Symbol;Acc:HGNC:23159]
ENSG00000252996	RNU6-1315P	0.032499	RNA, U6 small nuclear 1315, pseudogene [Source:HGNC Symbol;Acc:HGNC:48278]
ENSG00000222238	RNU2-43P	0.032539	RNA, U2 small nuclear 43, pseudogene [Source:HGNC Symbol;Acc:HGNC:48536]
ENSG00000107485	GATA3	0.0325674	GATA binding protein 3 [Source:HGNC Symbol;Acc:HGNC:4172]
ENSG00000140450	ARRDC4	0.0325936	arrestin domain containing 4 [Source:HGNC Symbol;Acc:HGNC:28087]
ENSG00000105486	LIG1	0.0326835	ligase I, DNA, ATP-dependent [Source:HGNC Symbol;Acc:HGNC:6598]
ENSG00000018699	TTC27	0.0327109	tetratricopeptide repeat domain 27 [Source:HGNC Symbol;Acc:HGNC:25986]
ENSG00000144583	MARCH4	0.0327123	membrane-associated ring finger (C3HC4) 4, E3 ubiquitin protein ligase [Source:HGNC Symbol;Acc:HGNC:29269]
ENSG00000106266	SNX8	0.0327734	sorting nexin 8 [Source:HGNC Symbol;Acc:HGNC:14972]
ENSG00000242265	PEG10	0.032822	paternally expressed 10 [Source:HGNC Symbol;Acc:HGNC:14005]
ENSG00000252164	RNA5SP282	0.0328248	RNA, 5S ribosomal pseudogene 282 [Source:HGNC Symbol;Acc:HGNC:43182]
ENSG00000188603	CLN3	0.0329017	ceroid-lipofuscinosis, neuronal 3 [Source:HGNC Symbol;Acc:HGNC:2074]
ENSG00000143878	RHOB	0.0329103	ras homolog family member B [Source:HGNC Symbol;Acc:HGNC:668]
ENSG00000140374	ETFA	0.0329345	electron-transfer-flavoprotein, alpha polypeptide [Source:HGNC Symbol;Acc:HGNC:3481]
ENSG00000100206	DMC1	0.0329693	DNA meiotic recombinase 1 [Source:HGNC Symbol;Acc:HGNC:2927]
ENSG00000252225	NA	0.0329697	Y RNA [Source:RFAM;Acc:RF00019]
ENSG00000078177	N4BP2	0.0329756	NEDD4 binding protein 2 [Source:HGNC Symbol;Acc:HGNC:29851]
ENSG00000128849	CGNL1	0.0329804	cingulin-like 1 [Source:HGNC Symbol;Acc:HGNC:25931]
ENSG00000142224	IL19	0.033005	interleukin 19 [Source:HGNC Symbol;Acc:HGNC:5990]
ENSG00000130935	NOL11	0.0330458	nucleolar protein 11 [Source:HGNC Symbol;Acc:HGNC:24557]
ENSG00000162618	ELTD1	0.0330468	EGF, latrophilin and seven transmembrane domain containing 1 [Source:HGNC Symbol;Acc:HGNC:20822]
ENSG00000139631	CSAD	0.0330568	cysteine sulfinic acid decarboxylase [Source:HGNC Symbol;Acc:HGNC:18966]
ENSG00000184343	SRPK3	0.0330696	SRSF protein kinase 3 [Source:HGNC Symbol;Acc:HGNC:11402]
ENSG00000163352	LENEP	0.0330701	lens epithelial protein [Source:HGNC Symbol;Acc:HGNC:14429]
ENSG00000113734	BNIP1	0.033074	BCL2/adenovirus E1B 19kDa interacting protein 1 [Source:HGNC Symbol;Acc:HGNC:1082]
ENSG00000118971	CCND2	0.0330859	cyclin D2 [Source:HGNC Symbol;Acc:HGNC:1583]
ENSG00000198753	PLXNB3	0.0331687	plexin B3 [Source:HGNC Symbol;Acc:HGNC:9105]
ENSG00000176771	NCKAP5	0.033182	NCK-associated protein 5 [Source:HGNC Symbol;Acc:HGNC:29847]
ENSG00000186806	VSIG10L	0.0331854	V-set and immunoglobulin domain containing 10 like [Source:HGNC Symbol;Acc:HGNC:27111]
ENSG00000187954	CYHR1	0.0332641	cysteine/histidine-rich 1 [Source:HGNC Symbol;Acc:HGNC:17806]
ENSG00000099250	NRP1	0.0333069	neuropilin 1 [Source:HGNC Symbol;Acc:HGNC:8004]
ENSG00000156140	ADAMTS3	0.0333333	ADAM metallopeptidase with thrombospondin type 1 motif, 3 [Source:HGNC Symbol;Acc:HGNC:219]
ENSG00000165672	PRDX3	0.0333855	peroxiredoxin 3 [Source:HGNC Symbol;Acc:HGNC:9354]
ENSG00000100033	PRODH	0.0333885	proline dehydrogenase (oxidase) 1 [Source:HGNC Symbol;Acc:HGNC:9453]
ENSG00000111452	GPR133	0.0334021	G protein-coupled receptor 133 [Source:HGNC Symbol;Acc:HGNC:19893]
ENSG00000241553	ARPC4	0.0334285	actin related protein 2/3 complex, subunit 4, 20kDa [Source:HGNC Symbol;Acc:HGNC:707]
ENSG00000222320	RNU6-1050P	0.0334388	RNA, U6 small nuclear 1050, pseudogene [Source:HGNC Symbol;Acc:HGNC:48013]
ENSG00000086619	ERO1LB	0.0334492	ERO1-like beta (S. cerevisiae) [Source:HGNC Symbol;Acc:HGNC:14355]
ENSG00000178445	GLDC	0.0334865	glycine dehydrogenase (decarboxylating) [Source:HGNC Symbol;Acc:HGNC:4313]
ENSG00000141744	PNMT	0.0335255	phenylethanolamine N-methyltransferase [Source:HGNC Symbol;Acc:HGNC:9160]
ENSG00000213071	LPAL2	0.0335963	lipoprotein, Lp(a)-like 2, pseudogene [Source:HGNC Symbol;Acc:HGNC:21210]
ENSG00000135083	CCNJL	0.0336387	cyclin J-like [Source:HGNC Symbol;Acc:HGNC:25876]
ENSG00000170500	LONRF2	0.0336498	LON peptidase N-terminal domain and ring finger 2 [Source:HGNC Symbol;Acc:HGNC:24788]
ENSG00000109339	MAPK10	0.033652	mitogen-activated protein kinase 10 [Source:HGNC Symbol;Acc:HGNC:6872]
ENSG00000074755	ZZEF1	0.0336609	zinc finger, ZZ-type with EF-hand domain 1 [Source:HGNC Symbol;Acc:HGNC:29027]
ENSG00000144460	NYAP2	0.0336659	neuronal tyrosine-phosphorylated phosphoinositide-3-kinase adaptor 2 [Source:HGNC Symbol;Acc:HGNC:29291]
ENSG00000148843	PDCD11	0.0337453	programmed cell death 11 [Source:HGNC Symbol;Acc:HGNC:13408]
ENSG00000181817	LSM10	0.0337849	LSM10, U7 small nuclear RNA associated [Source:HGNC Symbol;Acc:HGNC:17562]
ENSG00000196636	ACN9	0.0338032	ACN9 homolog (S. cerevisiae) [Source:HGNC Symbol;Acc:HGNC:21752]
ENSG00000077264	PAK3	0.0338144	p21 protein (Cdc42/Rac)-activated kinase 3 [Source:HGNC Symbol;Acc:HGNC:8592]
ENSG00000181915	ADO	0.0338181	2-aminoethanethiol (cysteamine) dioxygenase [Source:HGNC Symbol;Acc:HGNC:23506]
ENSG00000110723	EXPH5	0.0338615	exophilin 5 [Source:HGNC Symbol;Acc:HGNC:30578]
ENSG00000106462	EZH2	0.0338672	enhancer of zeste 2 polycomb repressive complex 2 subunit [Source:HGNC Symbol;Acc:HGNC:3527]
ENSG00000174718	KIAA1551	0.0339227	KIAA1551 [Source:HGNC Symbol;Acc:HGNC:25559]
ENSG00000184140	OR4F6	0.03397	olfactory receptor, family 4, subfamily F, member 6 [Source:HGNC Symbol;Acc:HGNC:15372]
ENSG00000196553	LINC00238	0.0339839	long intergenic non-protein coding RNA 238 [Source:HGNC Symbol;Acc:HGNC:20100]
ENSG00000164122	ASB5	0.0339885	ankyrin repeat and SOCS box containing 5 [Source:HGNC Symbol;Acc:HGNC:17180]
ENSG00000164591	MYOZ3	0.0340069	myozenin 3 [Source:HGNC Symbol;Acc:HGNC:18565]
ENSG00000196704	AMZ2	0.0340357	archaelysin family metallopeptidase 2 [Source:HGNC Symbol;Acc:HGNC:28041]
ENSG00000182858	ALG12	0.0340433	ALG12, alpha-1,6-mannosyltransferase [Source:HGNC Symbol;Acc:HGNC:19358]
ENSG00000160991	ORAI2	0.0340779	ORAI calcium release-activated calcium modulator 2 [Source:HGNC Symbol;Acc:HGNC:21667]
ENSG00000167136	ENDOG	0.03408	endonuclease G [Source:HGNC Symbol;Acc:HGNC:3346]
ENSG00000202536	NA	0.0341369	Y RNA [Source:RFAM;Acc:RF00019]
ENSG00000011243	AKAP8L	0.0341395	A kinase (PRKA) anchor protein 8-like [Source:HGNC Symbol;Acc:HGNC:29857]
ENSG00000137343	ATAT1	0.0342813	alpha tubulin acetyltransferase 1 [Source:HGNC Symbol;Acc:HGNC:21186]
ENSG00000168275	COA6	0.0343523	cytochrome c oxidase assembly factor 6 homolog (S. cerevisiae) [Source:HGNC Symbol;Acc:HGNC:18025]
ENSG00000176393	RNPEP	0.034379	arginyl aminopeptidase (aminopeptidase B) [Source:HGNC Symbol;Acc:HGNC:10078]
ENSG00000241487	RN7SL586P	0.0343886	RNA, 7SL, cytoplasmic 586, pseudogene [Source:HGNC Symbol;Acc:HGNC:46602]
ENSG00000131381	ZFYVE20	0.0343892	zinc finger, FYVE domain containing 20 [Source:HGNC Symbol;Acc:HGNC:20759]
ENSG00000188676	IDO2	0.0344055	indoleamine 2,3-dioxygenase 2 [Source:HGNC Symbol;Acc:HGNC:27269]
ENSG00000169599	NFU1	0.0344088	NFU1 iron-sulfur cluster scaffold [Source:HGNC Symbol;Acc:HGNC:16287]
ENSG00000160087	UBE2J2	0.034431	ubiquitin-conjugating enzyme E2, J2 [Source:HGNC Symbol;Acc:HGNC:19268]
ENSG00000221043	NA	0.0344467	Small nucleolar RNA U3 [Source:RFAM;Acc:RF00012]
ENSG00000147697	GSDMC	0.0344507	gasdermin C [Source:HGNC Symbol;Acc:HGNC:7151]
ENSG00000106080	FKBP14	0.0344642	FK506 binding protein 14, 22 kDa [Source:HGNC Symbol;Acc:HGNC:18625]
ENSG00000157388	CACNA1D	0.0344916	calcium channel, voltage-dependent, L type, alpha 1D subunit [Source:HGNC Symbol;Acc:HGNC:1391]
ENSG00000116771	AGMAT	0.0344977	agmatine ureohydrolase (agmatinase) [Source:HGNC Symbol;Acc:HGNC:18407]
ENSG00000169813	HNRNPF	0.0345323	heterogeneous nuclear ribonucleoprotein F [Source:HGNC Symbol;Acc:HGNC:5039]
ENSG00000196781	TLE1	0.0345652	transducin-like enhancer of split 1 (E(sp1) homolog, Drosophila) [Source:HGNC Symbol;Acc:HGNC:11837]
ENSG00000119042	SATB2	0.0345839	SATB homeobox 2 [Source:HGNC Symbol;Acc:HGNC:21637]
ENSG00000181201	HIST3H2BA	0.0345897	histone cluster 3, H2ba, pseudogene [Source:HGNC Symbol;Acc:HGNC:20515]
ENSG00000171723	GPHN	0.0346054	gephyrin [Source:HGNC Symbol;Acc:HGNC:15465]
ENSG00000182185	RAD51B	0.0346204	RAD51 paralog B [Source:HGNC Symbol;Acc:HGNC:9822]
ENSG00000207752	MIR199A1	0.0346428	microRNA 199a-1 [Source:HGNC Symbol;Acc:HGNC:31571]
ENSG00000113300	CNOT6	0.0346581	CCR4-NOT transcription complex, subunit 6 [Source:HGNC Symbol;Acc:HGNC:14099]
ENSG00000147896	IFNK	0.0346908	interferon, kappa [Source:HGNC Symbol;Acc:HGNC:21714]
ENSG00000252125	RNU6-1299P	0.0347002	RNA, U6 small nuclear 1299, pseudogene [Source:HGNC Symbol;Acc:HGNC:48262]
ENSG00000179846	NKPD1	0.0347279	NTPase, KAP family P-loop domain containing 1 [Source:HGNC Symbol;Acc:HGNC:24739]
ENSG00000132740	IGHMBP2	0.0347711	immunoglobulin mu binding protein 2 [Source:HGNC Symbol;Acc:HGNC:5542]
ENSG00000105321	CCDC9	0.0347884	coiled-coil domain containing 9 [Source:HGNC Symbol;Acc:HGNC:24560]
ENSG00000107611	CUBN	0.0347931	cubilin (intrinsic factor-cobalamin receptor) [Source:HGNC Symbol;Acc:HGNC:2548]
ENSG00000126838	PZP	0.034821	pregnancy-zone protein [Source:HGNC Symbol;Acc:HGNC:9750]
ENSG00000205413	SAMD9	0.0348434	sterile alpha motif domain containing 9 [Source:HGNC Symbol;Acc:HGNC:1348]
ENSG00000121897	LIAS	0.0348898	lipoic acid synthetase [Source:HGNC Symbol;Acc:HGNC:16429]
ENSG00000117020	AKT3	0.0349786	v-akt murine thymoma viral oncogene homolog 3 [Source:HGNC Symbol;Acc:HGNC:393]
ENSG00000116903	EXOC8	0.0349833	exocyst complex component 8 [Source:HGNC Symbol;Acc:HGNC:24659]
ENSG00000152689	RASGRP3	0.0349855	RAS guanyl releasing protein 3 (calcium and DAG-regulated) [Source:HGNC Symbol;Acc:HGNC:14545]
ENSG00000197622	CDC42SE1	0.0350011	CDC42 small effector 1 [Source:HGNC Symbol;Acc:HGNC:17719]
ENSG00000241794	SPRR2A	0.0350182	small proline-rich protein 2A [Source:HGNC Symbol;Acc:HGNC:11261]
ENSG00000165916	PSMC3	0.0350482	proteasome (prosome, macropain) 26S subunit, ATPase, 3 [Source:HGNC Symbol;Acc:HGNC:9549]
ENSG00000180869	C1orf180	0.0350682	chromosome 1 open reading frame 180 [Source:HGNC Symbol;Acc:HGNC:26647]
ENSG00000163376	KBTBD8	0.0351271	kelch repeat and BTB (POZ) domain containing 8 [Source:HGNC Symbol;Acc:HGNC:30691]
ENSG00000107949	BCCIP	0.035157	BRCA2 and CDKN1A interacting protein [Source:HGNC Symbol;Acc:HGNC:978]
ENSG00000154945	ANKRD40	0.0351652	ankyrin repeat domain 40 [Source:HGNC Symbol;Acc:HGNC:28233]
ENSG00000175203	DCTN2	0.0351705	dynactin 2 (p50) [Source:HGNC Symbol;Acc:HGNC:2712]
ENSG00000175711	B3GNTL1	0.0351897	UDP-GlcNAc:betaGal beta-1,3-N-acetylglucosaminyltransferase-like 1 [Source:HGNC Symbol;Acc:HGNC:21727]
ENSG00000113356	POLR3G	0.0352097	polymerase (RNA) III (DNA directed) polypeptide G (32kD) [Source:HGNC Symbol;Acc:HGNC:30075]
ENSG00000206650	SNORA70G	0.0352223	small nucleolar RNA, H/ACA box 70G [Source:HGNC Symbol;Acc:HGNC:34359]
ENSG00000115760	BIRC6	0.0352258	baculoviral IAP repeat containing 6 [Source:HGNC Symbol;Acc:HGNC:13516]
ENSG00000108515	ENO3	0.035278	enolase 3 (beta, muscle) [Source:HGNC Symbol;Acc:HGNC:3354]
ENSG00000132329	RAMP1	0.0353177	receptor (G protein-coupled) activity modifying protein 1 [Source:HGNC Symbol;Acc:HGNC:9843]
ENSG00000198542	ITGBL1	0.0353708	integrin, beta-like 1 (with EGF-like repeat domains) [Source:HGNC Symbol;Acc:HGNC:6164]
ENSG00000150594	ADRA2A	0.0355435	adrenoceptor alpha 2A [Source:HGNC Symbol;Acc:HGNC:281]
ENSG00000266439	RN7SL493P	0.0355729	RNA, 7SL, cytoplasmic 493, pseudogene [Source:HGNC Symbol;Acc:HGNC:46509]
ENSG00000171848	RRM2	0.0355738	ribonucleotide reductase M2 [Source:HGNC Symbol;Acc:HGNC:10452]
ENSG00000124172	ATP5E	0.0355743	ATP synthase, H+ transporting, mitochondrial F1 complex, epsilon subunit [Source:HGNC Symbol;Acc:HGNC:838]
ENSG00000158014	SLC30A2	0.0355776	solute carrier family 30 (zinc transporter), member 2 [Source:HGNC Symbol;Acc:HGNC:11013]
ENSG00000167604	NFKBID	0.0355822	nuclear factor of kappa light polypeptide gene enhancer in B-cells inhibitor, delta [Source:HGNC Symbol;Acc:HGNC:15671]
ENSG00000196683	TOMM7	0.0356309	translocase of outer mitochondrial membrane 7 homolog (yeast) [Source:HGNC Symbol;Acc:HGNC:21648]
ENSG00000214425	LRRC37A4P	0.0356339	leucine rich repeat containing 37, member A4, pseudogene [Source:HGNC Symbol;Acc:HGNC:25479]
ENSG00000103024	NME3	0.0356418	NME/NM23 nucleoside diphosphate kinase 3 [Source:HGNC Symbol;Acc:HGNC:7851]
ENSG00000074219	TEAD2	0.0356545	TEA domain family member 2 [Source:HGNC Symbol;Acc:HGNC:11715]
ENSG00000172349	IL16	0.0356684	interleukin 16 [Source:HGNC Symbol;Acc:HGNC:5980]
ENSG00000198929	NOS1AP	0.0356903	nitric oxide synthase 1 (neuronal) adaptor protein [Source:HGNC Symbol;Acc:HGNC:16859]
ENSG00000170832	USP32	0.0357083	ubiquitin specific peptidase 32 [Source:HGNC Symbol;Acc:HGNC:19143]
ENSG00000134874	DZIP1	0.0357788	DAZ interacting zinc finger protein 1 [Source:HGNC Symbol;Acc:HGNC:20908]
ENSG00000141552	ANAPC11	0.0357859	anaphase promoting complex subunit 11 [Source:HGNC Symbol;Acc:HGNC:14452]
ENSG00000123130	ACOT9	0.0358261	acyl-CoA thioesterase 9 [Source:HGNC Symbol;Acc:HGNC:17152]
ENSG00000104517	UBR5	0.0358279	ubiquitin protein ligase E3 component n-recognin 5 [Source:HGNC Symbol;Acc:HGNC:16806]
ENSG00000199715	NA	0.0358285	Y RNA [Source:RFAM;Acc:RF00019]
ENSG00000164100	NDST3	0.0358305	N-deacetylase/N-sulfotransferase (heparan glucosaminyl) 3 [Source:HGNC Symbol;Acc:HGNC:7682]
ENSG00000252028	RN7SKP52	0.0358479	RNA, 7SK small nuclear pseudogene 52 [Source:HGNC Symbol;Acc:HGNC:45776]
ENSG00000135960	EDAR	0.0358571	ectodysplasin A receptor [Source:HGNC Symbol;Acc:HGNC:2895]
ENSG00000237945	LINC00649	0.0359214	long intergenic non-protein coding RNA 649 [Source:HGNC Symbol;Acc:HGNC:44305]
ENSG00000170619	COMMD5	0.0360039	COMM domain containing 5 [Source:HGNC Symbol;Acc:HGNC:17902]
ENSG00000120690	ELF1	0.036012	E74-like factor 1 (ets domain transcription factor) [Source:HGNC Symbol;Acc:HGNC:3316]
ENSG00000111837	MAK	0.0360509	male germ cell-associated kinase [Source:HGNC Symbol;Acc:HGNC:6816]
ENSG00000185261	KIAA0825	0.0361362	KIAA0825 [Source:HGNC Symbol;Acc:HGNC:28532]
ENSG00000082556	OPRK1	0.0361522	opioid receptor, kappa 1 [Source:HGNC Symbol;Acc:HGNC:8154]
ENSG00000171824	EXOSC10	0.0361634	exosome component 10 [Source:HGNC Symbol;Acc:HGNC:9138]
ENSG00000186008	RPS4XP21	0.0361756	ribosomal protein S4X pseudogene 21 [Source:HGNC Symbol;Acc:HGNC:36228]
ENSG00000132849	INADL	0.036262	InaD-like (Drosophila) [Source:HGNC Symbol;Acc:HGNC:28881]
ENSG00000115266	APC2	0.0362911	adenomatosis polyposis coli 2 [Source:HGNC Symbol;Acc:HGNC:24036]
ENSG00000204657	OR2H2	0.0363608	olfactory receptor, family 2, subfamily H, member 2 [Source:HGNC Symbol;Acc:HGNC:8253]
ENSG00000128617	OPN1SW	0.0364034	opsin 1 (cone pigments), short-wave-sensitive [Source:HGNC Symbol;Acc:HGNC:1012]
ENSG00000163902	RPN1	0.0364087	ribophorin I [Source:HGNC Symbol;Acc:HGNC:10381]
ENSG00000132017	DCAF15	0.0364265	DDB1 and CUL4 associated factor 15 [Source:HGNC Symbol;Acc:HGNC:25095]
ENSG00000154511	FAM69A	0.0364282	family with sequence similarity 69, member A [Source:HGNC Symbol;Acc:HGNC:32213]
ENSG00000120675	DNAJC15	0.0364325	DnaJ (Hsp40) homolog, subfamily C, member 15 [Source:HGNC Symbol;Acc:HGNC:20325]
ENSG00000160396	HIPK4	0.0364547	homeodomain interacting protein kinase 4 [Source:HGNC Symbol;Acc:HGNC:19007]
ENSG00000203492	OR2N1P	0.0364816	olfactory receptor, family 2, subfamily N, member 1 pseudogene [Source:HGNC Symbol;Acc:HGNC:8271]
ENSG00000103942	HOMER2	0.0364947	homer homolog 2 (Drosophila) [Source:HGNC Symbol;Acc:HGNC:17513]
ENSG00000222889	RN7SKP29	0.0365146	RNA, 7SK small nuclear pseudogene 29 [Source:HGNC Symbol;Acc:HGNC:45753]
ENSG00000149289	ZC3H12C	0.0365842	zinc finger CCCH-type containing 12C [Source:HGNC Symbol;Acc:HGNC:29362]
ENSG00000153310	FAM49B	0.036627	family with sequence similarity 49, member B [Source:HGNC Symbol;Acc:HGNC:25216]
ENSG00000199492	RNU6-1313P	0.0367141	RNA, U6 small nuclear 1313, pseudogene [Source:HGNC Symbol;Acc:HGNC:48276]
ENSG00000201436	RNU6-660P	0.0367263	RNA, U6 small nuclear 660, pseudogene [Source:HGNC Symbol;Acc:HGNC:47623]
ENSG00000122707	RECK	0.0368014	reversion-inducing-cysteine-rich protein with kazal motifs [Source:HGNC Symbol;Acc:HGNC:11345]
ENSG00000115194	SLC30A3	0.0368045	solute carrier family 30 (zinc transporter), member 3 [Source:HGNC Symbol;Acc:HGNC:11014]
ENSG00000270170	NCBP2-AS2	0.0368327	NCBP2 antisense RNA 2 (head to head) [Source:HGNC Symbol;Acc:HGNC:25121]
ENSG00000226091	LINC00937	0.0369045	long intergenic non-protein coding RNA 937 [Source:HGNC Symbol;Acc:HGNC:48629]
ENSG00000115685	PPP1R7	0.0369085	protein phosphatase 1, regulatory subunit 7 [Source:HGNC Symbol;Acc:HGNC:9295]
ENSG00000152082	MZT2B	0.036913	mitotic spindle organizing protein 2B [Source:HGNC Symbol;Acc:HGNC:25886]
ENSG00000198870	STKLD1	0.0369617	serine/threonine kinase-like domain containing 1 [Source:HGNC Symbol;Acc:HGNC:28669]
ENSG00000145860	RNF145	0.0369685	ring finger protein 145 [Source:HGNC Symbol;Acc:HGNC:20853]
ENSG00000048740	CELF2	0.0369922	CUGBP, Elav-like family member 2 [Source:HGNC Symbol;Acc:HGNC:2550]
ENSG00000118705	RPN2	0.0369978	ribophorin II [Source:HGNC Symbol;Acc:HGNC:10382]
ENSG00000251886	RNU6-120P	0.0370452	RNA, U6 small nuclear 120, pseudogene [Source:HGNC Symbol;Acc:HGNC:47083]
ENSG00000140443	IGF1R	0.037074	insulin-like growth factor 1 receptor [Source:HGNC Symbol;Acc:HGNC:5465]
ENSG00000140675	SLC5A2	0.0371559	solute carrier family 5 (sodium/glucose cotransporter), member 2 [Source:HGNC Symbol;Acc:HGNC:11037]
ENSG00000105675	ATP4A	0.0372266	ATPase, H+/K+ exchanging, alpha polypeptide [Source:HGNC Symbol;Acc:HGNC:819]
ENSG00000108405	P2RX1	0.0372805	purinergic receptor P2X, ligand-gated ion channel, 1 [Source:HGNC Symbol;Acc:HGNC:8533]
ENSG00000169621	APLF	0.0373122	aprataxin and PNKP like factor [Source:HGNC Symbol;Acc:HGNC:28724]
ENSG00000274211	SOCS7	0.037315	suppressor of cytokine signaling 7 [Source:HGNC Symbol;Acc:HGNC:29846]
ENSG00000132465	IGJ	0.0373491	immunoglobulin J polypeptide, linker protein for immunoglobulin alpha and mu polypeptides [Source:HGNC Symbol;Acc:HGNC:5713]
ENSG00000150961	SEC24D	0.0374375	SEC24 family member D [Source:HGNC Symbol;Acc:HGNC:10706]
ENSG00000172457	OR9G4	0.0374409	olfactory receptor, family 9, subfamily G, member 4 [Source:HGNC Symbol;Acc:HGNC:15322]
ENSG00000221206	RNU6ATAC15P	0.0374813	RNA, U6atac small nuclear 15, pseudogene [Source:HGNC Symbol;Acc:HGNC:46914]
ENSG00000149782	PLCB3	0.0374899	phospholipase C, beta 3 (phosphatidylinositol-specific) [Source:HGNC Symbol;Acc:HGNC:9056]
ENSG00000199705	NA	0.0374924	Y RNA [Source:RFAM;Acc:RF00019]
ENSG00000156313	RPGR	0.037539	retinitis pigmentosa GTPase regulator [Source:HGNC Symbol;Acc:HGNC:10295]
ENSG00000172663	TMEM134	0.0375413	transmembrane protein 134 [Source:HGNC Symbol;Acc:HGNC:26142]
ENSG00000110719	TCIRG1	0.0375716	T-cell, immune regulator 1, ATPase, H+ transporting, lysosomal V0 subunit A3 [Source:HGNC Symbol;Acc:HGNC:11647]
ENSG00000222560	RNU4-43P	0.0375764	RNA, U4 small nuclear 43, pseudogene [Source:HGNC Symbol;Acc:HGNC:46979]
ENSG00000132122	SPATA6	0.0375866	spermatogenesis associated 6 [Source:HGNC Symbol;Acc:HGNC:18309]
ENSG00000163704	PRRT3	0.0376161	proline-rich transmembrane protein 3 [Source:HGNC Symbol;Acc:HGNC:26591]
ENSG00000099937	SERPIND1	0.0376689	serpin peptidase inhibitor, clade D (heparin cofactor), member 1 [Source:HGNC Symbol;Acc:HGNC:4838]
ENSG00000122728	TAF1L	0.0376708	TAF1 RNA polymerase II, TATA box binding protein (TBP)-associated factor, 210kDa-like [Source:HGNC Symbol;Acc:HGNC:18056]
ENSG00000187778	MCRS1	0.0376904	microspherule protein 1 [Source:HGNC Symbol;Acc:HGNC:6960]
ENSG00000276600	RAB7B	0.0376957	RAB7B, member RAS oncogene family [Source:HGNC Symbol;Acc:HGNC:30513]
ENSG00000149531	FRG1B	0.037725	FSHD region gene 1 family, member B [Source:HGNC Symbol;Acc:HGNC:15792]
ENSG00000087152	ATXN7L3	0.0377567	ataxin 7-like 3 [Source:HGNC Symbol;Acc:HGNC:25416]
ENSG00000163660	CCNL1	0.0377587	cyclin L1 [Source:HGNC Symbol;Acc:HGNC:20569]
ENSG00000162377	COA7	0.0378265	cytochrome c oxidase assembly factor 7 (putative) [Source:HGNC Symbol;Acc:HGNC:25716]
ENSG00000161609	CCDC155	0.0378305	coiled-coil domain containing 155 [Source:HGNC Symbol;Acc:HGNC:26520]
ENSG00000104756	KCTD9	0.0378913	potassium channel tetramerization domain containing 9 [Source:HGNC Symbol;Acc:HGNC:22401]
ENSG00000251727	RNU6-488P	0.0379273	RNA, U6 small nuclear 488, pseudogene [Source:HGNC Symbol;Acc:HGNC:47451]
ENSG00000179083	FAM133A	0.0379394	family with sequence similarity 133, member A [Source:HGNC Symbol;Acc:HGNC:26748]
ENSG00000197506	SLC28A3	0.0379409	solute carrier family 28 (concentrative nucleoside transporter), member 3 [Source:HGNC Symbol;Acc:HGNC:16484]
ENSG00000133106	EPSTI1	0.0379609	epithelial stromal interaction 1 (breast) [Source:HGNC Symbol;Acc:HGNC:16465]
ENSG00000207384	NA	0.0379701	Y RNA [Source:RFAM;Acc:RF00019]
ENSG00000214344	OR4F13P	0.0379944	olfactory receptor, family 4, subfamily F, member 13 pseudogene [Source:HGNC Symbol;Acc:HGNC:15076]
ENSG00000185298	CCDC137	0.0380177	coiled-coil domain containing 137 [Source:HGNC Symbol;Acc:HGNC:33451]
ENSG00000150938	CRIM1	0.0380328	cysteine rich transmembrane BMP regulator 1 (chordin-like) [Source:HGNC Symbol;Acc:HGNC:2359]
ENSG00000105755	ETHE1	0.0380716	ethylmalonic encephalopathy 1 [Source:HGNC Symbol;Acc:HGNC:23287]
ENSG00000157895	C12orf43	0.03815	chromosome 12 open reading frame 43 [Source:HGNC Symbol;Acc:HGNC:25719]
[truncated: 441 more rows]

## Sheet: Supplementary table 2
Suplementary table 2. Differentially expressed genes (DEGs) analysis
ID	AveExpr	P.Value	adj.P.Val	FC (Fold change)	logFC	Status
ENSG00000141837	9.10948	5.39e-33	5.67e-29	0.286667	-1.80255	Down-regulated
ENSG00000156076	5.32185	1.15e-10	5.49e-09	0.373791	-1.4197	Down-regulated
ENSG00000103888	7.60247	1.01e-29	7.06e-26	0.423004	-1.24126	Down-regulated
ENSG00000117602	8.44917	2.2e-24	7.72e-21	0.451996	-1.14562	Down-regulated
ENSG00000007372	8.38974	5.94e-12	4.13e-10	0.457468	-1.12826	Down-regulated
ENSG00000173208	6.1476	5.15e-12	3.66e-10	0.458003	-1.12657	Down-regulated
ENSG00000222490	3.88691	2.53e-08	5.55e-07	0.468467	-1.09398	Down-regulated
ENSG00000101134	8.10542	1.8e-12	1.54e-10	0.47002	-1.08921	Down-regulated
ENSG00000183914	6.24849	1.36e-22	3.18e-19	0.480329	-1.05791	Down-regulated
ENSG00000134115	6.76238	5.16e-11	2.71e-09	0.485149	-1.0435	Down-regulated
ENSG00000132932	7.87244	1.7e-15	3.94e-13	0.49737	-1.00761	Down-regulated
ENSG00000135903	5.4303	1.66e-08	3.87e-07	0.49989	-1.00032	Down-regulated
ENSG00000155011	5.34886	1.14e-07	2.03e-06	0.506791	-0.980538	Down-regulated
ENSG00000128683	5.50395	9.44e-08	1.73e-06	0.508738	-0.975007	Down-regulated
ENSG00000144857	7.53685	2.18e-07	3.56e-06	0.515305	-0.956501	Down-regulated
ENSG00000002746	6.19172	1.49e-15	3.52e-13	0.517746	-0.949685	Down-regulated
ENSG00000128655	4.878	2.58e-08	5.62e-07	0.520807	-0.941178	Down-regulated
ENSG00000159251	7.07279	2.53e-07	4.04e-06	0.52344	-0.933905	Down-regulated
ENSG00000102466	8.83116	4.34e-12	3.18e-10	0.523725	-0.933119	Down-regulated
ENSG00000140807	7.84046	1.11e-10	5.34e-09	0.524484	-0.931029	Down-regulated
ENSG00000172986	8.0524	9.23e-13	8.86e-11	0.524985	-0.929652	Down-regulated
ENSG00000096696	7.4346	2.43e-09	7.64e-08	0.530304	-0.915108	Down-regulated
ENSG00000165617	7.68434	4.7e-16	1.45e-13	0.530932	-0.913402	Down-regulated
ENSG00000142549	6.86535	2.49e-10	1.09e-08	0.533426	-0.906639	Down-regulated
ENSG00000171094	5.97776	4.39e-10	1.75e-08	0.5382	-0.893786	Down-regulated
ENSG00000198756	7.08003	3.26e-11	1.85e-09	0.53847	-0.893063	Down-regulated
ENSG00000198795	8.83267	1.69e-12	1.48e-10	0.538687	-0.892482	Down-regulated
ENSG00000168779	6.41429	4.67e-06	4.9e-05	0.543812	-0.878819	Down-regulated
ENSG00000138795	8.14939	2.01e-09	6.45e-08	0.545452	-0.874477	Down-regulated
ENSG00000136040	8.57572	7.25e-17	2.93e-14	0.547429	-0.869256	Down-regulated
ENSG00000083067	9.21253	1.22e-06	1.55e-05	0.547793	-0.868297	Down-regulated
ENSG00000182132	7.85571	3.15e-09	9.42e-08	0.549633	-0.863461	Down-regulated
ENSG00000151320	9.21786	7.5e-11	3.83e-09	0.550335	-0.861618	Down-regulated
ENSG00000135472	8.28143	2.14e-13	2.72e-11	0.551343	-0.858979	Down-regulated
ENSG00000174963	8.83528	3.73e-12	2.8e-10	0.553248	-0.854001	Down-regulated
ENSG00000205336	8.69623	4.95e-12	3.53e-10	0.55583	-0.847283	Down-regulated
ENSG00000152894	8.32988	1.22e-11	7.8e-10	0.556136	-0.846491	Down-regulated
ENSG00000178031	5.77829	5.96e-09	1.6e-07	0.558948	-0.839214	Down-regulated
ENSG00000155886	8.8319	2.18e-08	4.86e-07	0.560754	-0.834559	Down-regulated
ENSG00000074047	6.34328	1.59e-06	1.95e-05	0.563341	-0.82792	Down-regulated
ENSG00000077782	8.63611	6.24e-18	3.29e-15	0.564442	-0.825104	Down-regulated
ENSG00000176769	6.76504	3.49e-16	1.13e-13	0.56949	-0.812257	Down-regulated
ENSG00000112981	6.90681	4.44e-19	3.74e-16	0.5695	-0.812233	Down-regulated
ENSG00000006071	8.64235	1.23e-11	7.8e-10	0.571199	-0.807934	Down-regulated
ENSG00000158270	7.75676	1.66e-12	1.45e-10	0.571686	-0.806704	Down-regulated
ENSG00000170500	7.5205	5.65e-16	1.6e-13	0.572875	-0.803708	Down-regulated
ENSG00000140538	9.56601	1.95e-09	6.33e-08	0.574432	-0.799793	Down-regulated
ENSG00000041982	7.34896	1.52e-05	0.000135103	0.574688	-0.799148	Down-regulated
ENSG00000168679	7.58883	4.65e-18	2.72e-15	0.575038	-0.79827	Down-regulated
ENSG00000143344	8.02576	4.83e-12	3.47e-10	0.576454	-0.794723	Down-regulated
ENSG00000181234	6.23087	2.09e-08	4.67e-07	0.576716	-0.794068	Down-regulated
ENSG00000256124	4.8223	7.39e-16	1.99e-13	0.579184	-0.787905	Down-regulated
ENSG00000187323	10.4816	6.29e-10	2.4e-08	0.579393	-0.787385	Down-regulated
ENSG00000013297	7.57618	7.73e-10	2.85e-08	0.580509	-0.784609	Down-regulated
ENSG00000110723	7.98241	7.13e-10	2.65e-08	0.580596	-0.784393	Down-regulated
ENSG00000111913	7.44232	1.6e-05	0.000140849	0.581672	-0.781722	Down-regulated
ENSG00000182621	8.38892	4.05e-09	1.16e-07	0.582246	-0.7803	Down-regulated
ENSG00000180720	7.87938	2.27e-10	1e-08	0.583735	-0.776614	Down-regulated
ENSG00000152931	5.65254	4.94e-07	7.16e-06	0.584154	-0.775579	Down-regulated
ENSG00000050438	7.52254	6.72e-13	6.83e-11	0.584983	-0.773534	Down-regulated
ENSG00000198975	5.80206	1.03e-08	2.56e-07	0.586204	-0.770526	Down-regulated
ENSG00000109339	9.13796	1.53e-14	2.64e-12	0.587013	-0.768535	Down-regulated
ENSG00000127863	6.12317	2e-08	4.49e-07	0.587433	-0.767504	Down-regulated
ENSG00000132321	5.72691	1.03e-10	5.02e-09	0.589422	-0.762627	Down-regulated
ENSG00000092421	8.46458	3.17e-08	6.7e-07	0.589627	-0.762125	Down-regulated
ENSG00000131969	3.87861	3.78e-08	7.77e-07	0.591154	-0.758393	Down-regulated
ENSG00000104371	4.64762	2.55e-07	4.07e-06	0.592772	-0.754452	Down-regulated
ENSG00000144218	8.5384	1.32e-10	6.18e-09	0.594572	-0.750077	Down-regulated
ENSG00000186998	7.0075	2.53e-19	2.5e-16	0.594729	-0.749695	Down-regulated
ENSG00000171729	5.58213	2.03e-08	4.57e-07	0.595352	-0.748185	Down-regulated
ENSG00000137203	6.22704	1.85e-06	2.22e-05	0.595626	-0.74752	Down-regulated
ENSG00000125869	5.8883	5.68e-07	8.07e-06	0.596417	-0.745607	Down-regulated
ENSG00000095203	7.28167	1.76e-12	1.52e-10	0.597746	-0.742396	Down-regulated
ENSG00000184564	5.9457	6.51e-05	0.000463119	0.59922	-0.738842	Down-regulated
ENSG00000174640	8.16137	1.34e-11	8.36e-10	0.599842	-0.737346	Down-regulated
ENSG00000155980	9.28147	3.56e-19	3.25e-16	0.601127	-0.734259	Down-regulated
ENSG00000175147	4.98508	4.14e-09	1.18e-07	0.602111	-0.731899	Down-regulated
ENSG00000128710	4.60349	9.22e-06	8.77e-05	0.603409	-0.728792	Down-regulated
ENSG00000125378	6.30047	6.33e-10	2.41e-08	0.603509	-0.728552	Down-regulated
ENSG00000124813	6.38014	4.22e-08	8.58e-07	0.604736	-0.725624	Down-regulated
ENSG00000145431	7.35182	2.87e-13	3.39e-11	0.605456	-0.723907	Down-regulated
ENSG00000252249	4.28093	7.9e-08	1.48e-06	0.607085	-0.720029	Down-regulated
ENSG00000139970	9.47694	1.65e-20	2.68e-17	0.608426	-0.716847	Down-regulated
ENSG00000141433	7.22526	4.3e-06	4.57e-05	0.608708	-0.716177	Down-regulated
ENSG00000183580	7.41044	3.05e-09	9.2e-08	0.609629	-0.713996	Down-regulated
ENSG00000165072	5.62424	3.6e-07	5.5e-06	0.609915	-0.713321	Down-regulated
ENSG00000196361	9.43028	1.14e-11	7.37e-10	0.610256	-0.712514	Down-regulated
ENSG00000157064	8.51689	4.8e-09	1.33e-07	0.613563	-0.704716	Down-regulated
ENSG00000170419	9.16375	3.43e-05	0.000269795	0.614163	-0.703307	Down-regulated
ENSG00000218336	8.26598	2.55e-05	0.000209779	0.614308	-0.702966	Down-regulated
ENSG00000237984	4.67063	5.85e-12	4.1e-10	0.61445	-0.702633	Down-regulated
ENSG00000113494	6.0915	0.000535373	0.00268619	0.616774	-0.697186	Down-regulated
ENSG00000172716	5.65433	1.93e-07	3.2e-06	0.616841	-0.697029	Down-regulated
ENSG00000168016	6.52872	2.24e-22	4.7e-19	0.617122	-0.696372	Down-regulated
ENSG00000102678	7.60249	2.83e-12	2.23e-10	0.617211	-0.696165	Down-regulated
ENSG00000237125	4.79771	7.59e-08	1.43e-06	0.618143	-0.693988	Down-regulated
ENSG00000089169	8.92135	0.000766496	0.00362607	0.618243	-0.693755	Down-regulated
ENSG00000178573	5.60114	1.74e-10	7.94e-09	0.61827	-0.693691	Down-regulated
ENSG00000091409	7.22945	3.46e-11	1.94e-09	0.620364	-0.688813	Down-regulated
ENSG00000145087	9.17911	1.05e-15	2.63e-13	0.620607	-0.688248	Down-regulated
ENSG00000144668	7.809	2.19e-10	9.77e-09	0.620989	-0.68736	Down-regulated
ENSG00000182348	5.60461	9.11e-05	0.000611079	0.621184	-0.686908	Down-regulated
ENSG00000108375	5.67924	1.27e-09	4.37e-08	0.621555	-0.686047	Down-regulated
ENSG00000129219	7.29601	8.23e-16	2.16e-13	0.622618	-0.683582	Down-regulated
ENSG00000056736	6.14913	4.97e-13	5.48e-11	0.622973	-0.68276	Down-regulated
ENSG00000095739	6.1527	1.09e-08	2.69e-07	0.623322	-0.681951	Down-regulated
ENSG00000137766	6.6104	9.01e-06	8.6e-05	0.62338	-0.681815	Down-regulated
ENSG00000260230	9.13264	8.17e-13	8.15e-11	0.624345	-0.679584	Down-regulated
ENSG00000109113	7.28556	1.43e-18	1e-15	0.62437	-0.679528	Down-regulated
ENSG00000157388	6.95094	3.33e-11	1.87e-09	0.625251	-0.677494	Down-regulated
ENSG00000167654	8.88288	2.7e-10	1.16e-08	0.627055	-0.673336	Down-regulated
ENSG00000118298	6.44556	5.54e-08	1.08e-06	0.628141	-0.670841	Down-regulated
ENSG00000167740	7.88401	6.92e-50	1.46e-45	0.628235	-0.670625	Down-regulated
ENSG00000159164	8.45622	9.94e-13	9.29e-11	0.629765	-0.667115	Down-regulated
ENSG00000138604	9.86084	7.38e-23	1.94e-19	0.631678	-0.662739	Down-regulated
ENSG00000136859	8.10225	1.66e-05	0.000145667	0.632471	-0.660928	Down-regulated
ENSG00000106804	7.33382	3.93e-23	1.18e-19	0.634791	-0.655646	Down-regulated
ENSG00000114115	7.61299	3.35e-09	9.88e-08	0.63529	-0.654512	Down-regulated
ENSG00000144191	6.37834	2.61e-05	0.000214104	0.635757	-0.653453	Down-regulated
ENSG00000111490	8.26295	9.82e-13	9.26e-11	0.636686	-0.651345	Down-regulated
ENSG00000102452	6.63739	2.25e-10	9.99e-09	0.636714	-0.651283	Down-regulated
ENSG00000057704	8.36418	9.28e-13	8.87e-11	0.636924	-0.650807	Down-regulated
ENSG00000125246	6.91032	4.86e-08	9.71e-07	0.6377	-0.649051	Down-regulated
ENSG00000005059	6.10514	6.71e-07	9.25e-06	0.638366	-0.647543	Down-regulated
ENSG00000137142	10.6002	2.12e-14	3.48e-12	0.640136	-0.64355	Down-regulated
ENSG00000152977	11.8388	5.32e-10	2.06e-08	0.640348	-0.643071	Down-regulated
ENSG00000170370	5.3034	7.64e-05	0.000527253	0.640483	-0.642768	Down-regulated
ENSG00000174460	6.76319	8.35e-12	5.59e-10	0.641804	-0.639794	Down-regulated
ENSG00000154330	5.14851	2.12e-07	3.47e-06	0.641832	-0.639731	Down-regulated
ENSG00000073670	7.43474	2.24e-14	3.63e-12	0.642013	-0.639325	Down-regulated
ENSG00000162944	7.88868	3.21e-05	0.000255269	0.642684	-0.637819	Down-regulated
ENSG00000196917	4.73802	3.62e-05	0.000282695	0.644156	-0.634518	Down-regulated
ENSG00000185518	9.82163	9.26e-07	1.22e-05	0.645638	-0.631203	Down-regulated
ENSG00000144057	8.0737	1.06e-09	3.76e-08	0.647305	-0.627483	Down-regulated
ENSG00000162545	10.1818	7.73e-09	2e-07	0.648432	-0.624973	Down-regulated
ENSG00000041515	7.19351	1.58e-05	0.000139572	0.64901	-0.623687	Down-regulated
ENSG00000143847	6.93254	8.95e-19	6.72e-16	0.64945	-0.622711	Down-regulated
ENSG00000183454	6.40222	1.63e-05	0.000143053	0.650559	-0.620248	Down-regulated
ENSG00000140015	4.37189	9.39e-08	1.72e-06	0.650894	-0.619506	Down-regulated
ENSG00000125398	7.96003	1.11e-10	5.37e-09	0.65108	-0.619092	Down-regulated
ENSG00000157542	7.20777	3.69e-07	5.61e-06	0.651884	-0.617312	Down-regulated
ENSG00000166091	5.27484	3.37e-14	5.22e-12	0.653965	-0.612714	Down-regulated
ENSG00000137460	6.70663	0.000224678	0.00129984	0.654016	-0.612601	Down-regulated
ENSG00000006042	8.18273	4.42e-14	6.59e-12	0.654518	-0.611496	Down-regulated
ENSG00000177822	6.25323	1.32e-05	0.000119565	0.655775	-0.608728	Down-regulated
ENSG00000144550	5.9889	2.6e-10	1.13e-08	0.65597	-0.608297	Down-regulated
ENSG00000154127	6.66175	1.91e-09	6.21e-08	0.655978	-0.608281	Down-regulated
ENSG00000196372	7.41444	8.42e-13	8.31e-11	0.656873	-0.606314	Down-regulated
ENSG00000102287	5.99873	1.48e-07	2.55e-06	0.657437	-0.605076	Down-regulated
ENSG00000103056	7.76681	1.52e-17	7.42e-15	0.657488	-0.604965	Down-regulated
ENSG00000166448	7.90877	1.06e-10	5.15e-09	0.65931	-0.600971	Down-regulated
ENSG00000148848	6.71387	6.99e-08	1.33e-06	0.659754	-0.6	Down-regulated
ENSG00000164761	4.25613	1.37e-09	4.66e-08	0.659947	-0.599578	Down-regulated
ENSG00000163235	5.28101	3.06e-09	9.22e-08	0.660269	-0.598875	Down-regulated
ENSG00000154856	9.00031	5.7e-08	1.11e-06	0.660341	-0.598717	Down-regulated
ENSG00000136161	8.17866	1.13e-14	2.02e-12	0.660491	-0.598389	Down-regulated
ENSG00000151838	6.14087	3.44e-10	1.43e-08	0.660913	-0.597467	Down-regulated
ENSG00000142149	7.8816	1.31e-07	2.29e-06	0.661325	-0.596569	Down-regulated
ENSG00000151364	7.91445	1.74e-12	1.51e-10	0.661499	-0.596188	Down-regulated
ENSG00000159713	7.45628	7.84e-07	1.06e-05	0.661915	-0.595282	Down-regulated
ENSG00000179277	8.68497	2.2e-18	1.49e-15	0.662295	-0.594455	Down-regulated
ENSG00000166833	7.74165	5.02e-06	5.22e-05	0.663977	-0.590794	Down-regulated
ENSG00000145934	5.57904	5.8e-06	5.89e-05	0.664047	-0.590644	Down-regulated
ENSG00000166676	6.62514	1.11e-07	1.99e-06	0.664296	-0.590102	Down-regulated
ENSG00000011347	7.07277	6.34e-07	8.86e-06	0.664669	-0.589292	Down-regulated
ENSG00000003987	6.54707	4.16e-06	4.43e-05	0.664709	-0.589205	Down-regulated
ENSG00000188596	5.33835	6.19e-12	4.26e-10	0.664763	-0.589087	Down-regulated
ENSG00000135409	5.37779	6.75e-07	9.27e-06	0.664788	-0.589033	Down-regulated
ENSG00000141756	7.51801	5.78e-06	5.87e-05	0.665374	-0.587763	Down-regulated
ENSG00000152092	7.68067	5.44e-12	3.85e-10	0.666358	-0.585631	Down-regulated
ENSG00000172296	5.04076	9.1e-08	1.67e-06	0.666797	-0.58468	Intact
ENSG00000109944	6.26471	9.99e-10	3.58e-08	0.667598	-0.582949	Intact
ENSG00000100504	6.80622	1.33e-07	2.33e-06	0.667915	-0.582264	Intact
ENSG00000102349	6.11498	2.38e-09	7.49e-08	0.670193	-0.577352	Intact
ENSG00000182195	8.44162	5.57e-08	1.09e-06	0.670345	-0.577023	Intact
ENSG00000229950	4.64075	8.73e-08	1.61e-06	0.670538	-0.576608	Intact
ENSG00000153815	9.33594	6.06e-15	1.17e-12	0.670719	-0.57622	Intact
ENSG00000185008	7.06758	0.00188582	0.00764654	0.671013	-0.575588	Intact
ENSG00000157978	5.94042	5.03e-13	5.48e-11	0.671544	-0.574446	Intact
ENSG00000102878	8.03826	8.8e-15	1.64e-12	0.672171	-0.573099	Intact
ENSG00000169992	7.70441	9.51e-28	5e-24	0.672432	-0.572539	Intact
ENSG00000099204	8.53176	1.09e-08	2.68e-07	0.673876	-0.569446	Intact
ENSG00000087245	7.17933	0.00030195	0.00166041	0.673896	-0.569402	Intact
ENSG00000109099	9.11667	3.9e-07	5.86e-06	0.673983	-0.569215	Intact
ENSG00000112137	8.6235	2.78e-15	5.73e-13	0.674133	-0.568894	Intact
ENSG00000158966	9.32757	2.12e-11	1.26e-09	0.674151	-0.568856	Intact
ENSG00000135048	7.03901	5.74e-07	8.14e-06	0.674594	-0.567908	Intact
ENSG00000067798	6.80289	6.74e-10	2.53e-08	0.675007	-0.567026	Intact
ENSG00000147234	7.68871	8.51e-15	1.6e-12	0.675603	-0.565753	Intact
ENSG00000107611	6.93883	1.72e-08	3.98e-07	0.676139	-0.564609	Intact
ENSG00000183570	8.14194	4.64e-09	1.3e-07	0.676301	-0.564264	Intact
ENSG00000201183	4.95089	1.52e-09	5.09e-08	0.676318	-0.564226	Intact
ENSG00000199546	4.8506	2.32e-07	3.75e-06	0.677075	-0.562612	Intact
ENSG00000162188	8.02454	0.000111507	0.000725932	0.678268	-0.560074	Intact
ENSG00000173421	5.36033	2.1e-07	3.44e-06	0.679001	-0.558515	Intact
ENSG00000136193	9.38361	2.44e-09	7.67e-08	0.679041	-0.558429	Intact
ENSG00000079215	8.2455	1.06e-05	9.96e-05	0.679173	-0.558148	Intact
ENSG00000105255	7.20135	9.32e-07	1.23e-05	0.679769	-0.556883	Intact
ENSG00000139083	8.21467	4.34e-11	2.35e-09	0.679857	-0.556696	Intact
ENSG00000092068	7.52995	4.41e-09	1.24e-07	0.679941	-0.556518	Intact
ENSG00000186204	3.94374	9.97e-09	2.5e-07	0.680586	-0.55515	Intact
ENSG00000244405	8.03921	7.89e-09	2.03e-07	0.681456	-0.553308	Intact
ENSG00000128596	7.19104	2.17e-15	4.7e-13	0.682081	-0.551984	Intact
ENSG00000144834	9.17843	1.35e-06	1.69e-05	0.68268	-0.550718	Intact
ENSG00000135083	7.65522	1.84e-08	4.18e-07	0.683079	-0.549875	Intact
ENSG00000135439	6.58556	8.77e-17	3.39e-14	0.683616	-0.548741	Intact
ENSG00000221818	5.64284	0.000833105	0.00387407	0.683861	-0.548225	Intact
ENSG00000144730	7.02017	1.93e-11	1.16e-09	0.68398	-0.547975	Intact
ENSG00000107984	4.3279	0.000192288	0.00114125	0.684011	-0.547908	Intact
ENSG00000178150	5.84428	1.62e-14	2.77e-12	0.684209	-0.54749	Intact
ENSG00000121440	6.30318	2.63e-05	0.000215173	0.684248	-0.547408	Intact
ENSG00000089060	6.57357	3.02e-12	2.35e-10	0.684268	-0.547367	Intact
ENSG00000196092	7.27404	5.63e-06	5.75e-05	0.684431	-0.547023	Intact
ENSG00000165323	6.35479	1.87e-06	2.25e-05	0.684598	-0.546672	Intact
ENSG00000151789	8.8273	7.82e-05	0.000537482	0.684654	-0.546552	Intact
ENSG00000142192	11.4123	1.75e-12	1.52e-10	0.68467	-0.54652	Intact
ENSG00000185483	7.96002	1.01e-06	1.31e-05	0.684685	-0.546488	Intact
ENSG00000072840	6.39397	8.45e-07	1.13e-05	0.685261	-0.545274	Intact
ENSG00000222033	4.69917	5.26e-10	2.05e-08	0.685449	-0.544878	Intact
ENSG00000161082	7.67021	9.34e-07	1.23e-05	0.68607	-0.543572	Intact
ENSG00000167861	7.3717	7.39e-14	1.04e-11	0.686924	-0.541778	Intact
ENSG00000201672	5.35883	0.000117952	0.000761762	0.687479	-0.540612	Intact
ENSG00000187855	3.83211	1.18e-07	2.1e-06	0.687999	-0.539522	Intact
ENSG00000171451	6.87652	9.1e-07	1.2e-05	0.688293	-0.538906	Intact
ENSG00000111432	5.84688	6.19e-07	8.68e-06	0.688304	-0.538882	Intact
ENSG00000105270	9.58522	7.8e-18	4e-15	0.688376	-0.538732	Intact
ENSG00000178764	8.24035	4.79e-17	2.05e-14	0.68866	-0.538136	Intact
ENSG00000065320	7.80508	5.27e-08	1.04e-06	0.688954	-0.537521	Intact
ENSG00000168785	9.52662	3.23e-14	5.07e-12	0.689069	-0.537279	Intact
ENSG00000157890	6.88565	1.33e-11	8.36e-10	0.689123	-0.537166	Intact
ENSG00000138134	6.47747	7.51e-12	5.06e-10	0.689184	-0.537038	Intact
ENSG00000119514	6.71924	6.99e-05	0.00049172	0.689311	-0.536774	Intact
ENSG00000196781	8.84669	2.24e-07	3.62e-06	0.689913	-0.535513	Intact
ENSG00000116132	7.50928	9.56e-09	2.41e-07	0.691368	-0.532475	Intact
ENSG00000168646	7.80778	3.16e-10	1.33e-08	0.691433	-0.532339	Intact
ENSG00000188517	6.53323	0.000119989	0.000773018	0.691742	-0.531695	Intact
ENSG00000175600	5.5861	1.5e-10	6.97e-09	0.691859	-0.531449	Intact
ENSG00000231160	7.18478	7.61e-14	1.06e-11	0.692184	-0.530773	Intact
ENSG00000169302	6.87208	5.65e-06	5.77e-05	0.69239	-0.530342	Intact
ENSG00000164604	6.8	3.69e-05	0.000286885	0.692432	-0.530255	Intact
ENSG00000102230	6.47294	2.03e-09	6.49e-08	0.6925	-0.530113	Intact
ENSG00000119042	7.24138	0.00230696	0.0090219	0.69367	-0.52768	Intact
ENSG00000186314	5.33559	4.07e-05	0.000311272	0.693714	-0.527588	Intact
ENSG00000169218	5.53242	1.18e-06	1.5e-05	0.693788	-0.527432	Intact
ENSG00000169169	8.32705	8.13e-17	3.23e-14	0.693925	-0.527148	Intact
ENSG00000180628	6.35674	4.98e-08	9.9e-07	0.694267	-0.526438	Intact
ENSG00000111145	7.67654	2.3e-13	2.89e-11	0.694322	-0.526323	Intact
ENSG00000196358	8.0496	6.73e-09	1.78e-07	0.694358	-0.526249	Intact
ENSG00000162951	5.69635	2.95e-06	3.32e-05	0.694558	-0.525832	Intact
ENSG00000174607	6.32666	2.47e-05	0.000203691	0.695069	-0.524773	Intact
ENSG00000155849	8.484	1.58e-07	2.68e-06	0.695757	-0.523345	Intact
ENSG00000131386	6.62121	2.94e-05	0.000236547	0.695788	-0.523281	Intact
ENSG00000165509	4.62888	4.65e-08	9.36e-07	0.696269	-0.522283	Intact
ENSG00000146910	7.08597	0.0015568	0.00652638	0.696307	-0.522204	Intact
ENSG00000136158	8.0092	4.2e-07	6.22e-06	0.697713	-0.519294	Intact
ENSG00000154165	4.59217	0.0154641	0.0429619	0.698042	-0.518614	Intact
ENSG00000100060	6.92079	1.84e-08	4.18e-07	0.698322	-0.518036	Intact
ENSG00000110076	7.98209	4.02e-12	2.99e-10	0.698718	-0.517217	Intact
ENSG00000049540	7.64545	1.43e-06	1.78e-05	0.698907	-0.516828	Intact
ENSG00000115828	6.0209	1.49e-06	1.84e-05	0.699131	-0.516365	Intact
ENSG00000164764	7.59084	0.000457195	0.00235116	0.699214	-0.516194	Intact
ENSG00000107317	8.51058	1.45e-05	0.000129897	0.69953	-0.515543	Intact
ENSG00000157103	8.13196	2.01e-09	6.44e-08	0.699813	-0.51496	Intact
ENSG00000233670	6.07441	0.000718892	0.00344348	0.699817	-0.51495	Intact
ENSG00000132535	8.88843	1.12e-16	4.07e-14	0.700246	-0.514066	Intact
ENSG00000173698	4.4455	3.51e-06	3.85e-05	0.700334	-0.513884	Intact
ENSG00000135074	7.45424	1.67e-07	2.81e-06	0.700504	-0.513534	Intact
ENSG00000106333	7.70126	3.79e-06	4.11e-05	0.700895	-0.512729	Intact
ENSG00000120594	9.89737	2.65e-11	1.55e-09	0.701083	-0.512343	Intact
ENSG00000169126	4.93532	9.89e-08	1.8e-06	0.701297	-0.511903	Intact
ENSG00000176387	7.19038	0.000126988	0.000811888	0.701504	-0.511477	Intact
ENSG00000152214	5.53668	0.000381284	0.00202978	0.701536	-0.511412	Intact
ENSG00000153237	5.00234	1.04e-09	3.7e-08	0.701756	-0.510958	Intact
ENSG00000105605	6.64168	5.17e-07	7.45e-06	0.701772	-0.510927	Intact
ENSG00000018625	8.22762	3.04e-09	9.19e-08	0.702185	-0.510076	Intact
ENSG00000053702	6.96867	0.000957274	0.00435705	0.702329	-0.509781	Intact
ENSG00000078328	8.62547	4.07e-05	0.000311272	0.702416	-0.509601	Intact
ENSG00000165633	7.55497	1.72e-06	2.09e-05	0.702607	-0.50921	Intact
ENSG00000151778	6.41913	3.44e-13	3.96e-11	0.702986	-0.508431	Intact
ENSG00000188643	6.99652	2.56e-09	7.91e-08	0.703929	-0.506498	Intact
ENSG00000078579	6.23456	4.03e-07	6.02e-06	0.704067	-0.506216	Intact
ENSG00000138735	6.9126	0.00159628	0.0066693	0.704209	-0.505925	Intact
ENSG00000168306	6.06094	1.81e-14	3.03e-12	0.704364	-0.505607	Intact
ENSG00000171435	5.88473	3.95e-14	6.02e-12	0.704506	-0.505316	Intact
ENSG00000027644	6.29793	1.6e-10	7.4e-09	0.70504	-0.504223	Intact
ENSG00000178445	7.23132	5.61e-07	8e-06	0.705297	-0.503696	Intact
ENSG00000171786	8.4272	0.000226265	0.00130728	0.705527	-0.503227	Intact
ENSG00000106484	10.2441	2.94e-14	4.68e-12	0.705719	-0.502834	Intact
ENSG00000111817	7.82886	4.7e-13	5.23e-11	0.707242	-0.499725	Intact
ENSG00000107954	7.67296	1.3e-05	0.000117874	0.707359	-0.499485	Intact
ENSG00000057294	6.68254	4.2e-07	6.21e-06	0.707438	-0.499325	Intact
ENSG00000080493	8.2489	1.98e-06	2.35e-05	0.707444	-0.499312	Intact
ENSG00000107736	9.05082	0.00820566	0.0257075	0.708379	-0.497407	Intact
ENSG00000167100	7.80879	4.28e-13	4.79e-11	0.708873	-0.496401	Intact
ENSG00000167371	9.44572	7.14e-11	3.66e-09	0.708892	-0.496363	Intact
ENSG00000186469	8.94548	5.46e-09	1.48e-07	0.709039	-0.496064	Intact
ENSG00000137474	7.44536	8.78e-05	0.00059215	0.709046	-0.496048	Intact
ENSG00000066468	6.42495	5.65e-06	5.77e-05	0.709062	-0.496016	Intact
ENSG00000120149	5.35464	3.82e-07	5.75e-06	0.709141	-0.495855	Intact
ENSG00000163359	6.64631	0.00168177	0.00696557	0.709222	-0.495691	Intact
ENSG00000120820	7.52855	0.0014422	0.00611422	0.709806	-0.494503	Intact
ENSG00000163568	6.67336	4.48e-09	1.26e-07	0.710693	-0.492701	Intact
ENSG00000088836	6.44054	0.000276467	0.00154246	0.710795	-0.492495	Intact
ENSG00000244242	6.57216	2.53e-07	4.04e-06	0.711085	-0.491907	Intact
ENSG00000044524	7.30464	0.00452279	0.0157616	0.711365	-0.491337	Intact
ENSG00000173210	8.04371	5.34e-06	5.5e-05	0.712068	-0.489913	Intact
ENSG00000064300	6.88503	2.71e-05	0.000220672	0.712449	-0.489142	Intact
ENSG00000204681	8.75727	2.14e-07	3.49e-06	0.712533	-0.488971	Intact
ENSG00000034053	8.35211	1.72e-08	3.97e-07	0.712956	-0.488115	Intact
ENSG00000159842	7.8206	5.84e-12	4.1e-10	0.713216	-0.487589	Intact
ENSG00000163297	9.37121	9.7e-12	6.38e-10	0.713229	-0.487562	Intact
ENSG00000183908	6.45966	6.56e-07	9.08e-06	0.71331	-0.4874	Intact
ENSG00000153029	5.70872	2.45e-15	5.16e-13	0.713345	-0.487329	Intact
ENSG00000198053	6.40082	1.03e-10	5.02e-09	0.71336	-0.487299	Intact
ENSG00000146352	7.82709	0.000761473	0.00360799	0.714664	-0.484664	Intact
ENSG00000016391	5.9199	2.21e-11	1.31e-09	0.714688	-0.484614	Intact
ENSG00000169604	8.57217	3.89e-12	2.9e-10	0.714714	-0.484561	Intact
ENSG00000207256	5.73819	2.48e-08	5.44e-07	0.714773	-0.484442	Intact
ENSG00000168280	9.9759	1.66e-09	5.49e-08	0.714979	-0.484027	Intact
ENSG00000150637	5.39462	2.15e-06	2.53e-05	0.71624	-0.481484	Intact
ENSG00000138172	7.09064	4.84e-11	2.57e-09	0.71627	-0.481424	Intact
ENSG00000154721	8.71824	3.74e-07	5.67e-06	0.716309	-0.481346	Intact
ENSG00000108576	5.40935	0.000398372	0.0021016	0.716505	-0.480952	Intact
ENSG00000139625	7.84691	4.01e-18	2.41e-15	0.716539	-0.480883	Intact
ENSG00000109458	9.82604	3.95e-06	4.26e-05	0.716964	-0.480026	Intact
ENSG00000137691	4.44855	0.000271663	0.0015201	0.717215	-0.479523	Intact
ENSG00000174871	8.6884	2.59e-09	7.99e-08	0.717294	-0.479363	Intact
ENSG00000203685	5.94498	5.04e-09	1.39e-07	0.717368	-0.479214	Intact
ENSG00000066032	6.53441	1.52e-09	5.1e-08	0.717591	-0.478765	Intact
ENSG00000174327	5.40828	1.1e-20	2.1e-17	0.717634	-0.47868	Intact
ENSG00000166922	6.23159	0.000315591	0.00172729	0.717764	-0.478419	Intact
ENSG00000162551	6.48359	3.77e-07	5.7e-06	0.718814	-0.476309	Intact
ENSG00000091986	7.32251	2.79e-05	0.000226651	0.719301	-0.475332	Intact
ENSG00000128045	6.4405	0.00126201	0.00547054	0.719395	-0.475144	Intact
ENSG00000166016	6.5609	3.5e-08	7.31e-07	0.719417	-0.475099	Intact
ENSG00000239319	5.45095	0.00344186	0.0126011	0.719867	-0.474197	Intact
ENSG00000092096	10.1056	7.45e-19	5.8e-16	0.720379	-0.473172	Intact
ENSG00000113448	8.0819	1.18e-08	2.87e-07	0.720703	-0.472522	Intact
ENSG00000153012	5.37275	2.4e-05	0.000199139	0.720796	-0.472337	Intact
ENSG00000135454	7.62995	5.31e-07	7.63e-06	0.720981	-0.471967	Intact
ENSG00000146242	7.15407	1.4e-05	0.000126	0.720991	-0.471946	Intact
ENSG00000131080	6.80386	2.6e-06	2.99e-05	0.721375	-0.471178	Intact
ENSG00000135750	5.81045	2.74e-05	0.000222778	0.721421	-0.471086	Intact
ENSG00000132164	6.95826	2.56e-06	2.95e-05	0.721526	-0.470876	Intact
ENSG00000122176	5.82348	0.00031281	0.00171386	0.722669	-0.468593	Intact
ENSG00000147246	4.80652	0.00444044	0.0155188	0.72291	-0.468113	Intact
ENSG00000161149	7.91227	3.16e-14	4.99e-12	0.72313	-0.467674	Intact
ENSG00000148604	5.48222	2.24e-06	2.62e-05	0.72313	-0.467673	Intact
ENSG00000155970	7.12991	1.03e-10	5.02e-09	0.723594	-0.466748	Intact
ENSG00000204701	5.75943	0.000461654	0.00236945	0.723654	-0.466628	Intact
ENSG00000014914	6.4349	4.04e-14	6.11e-12	0.723934	-0.466071	Intact
ENSG00000139174	8.70757	1.4e-07	2.43e-06	0.72412	-0.465699	Intact
ENSG00000107742	8.42218	2.3e-06	2.69e-05	0.72414	-0.465659	Intact
ENSG00000145721	5.4851	3.38e-05	0.000266509	0.724481	-0.464981	Intact
ENSG00000065357	7.13845	1.34e-20	2.35e-17	0.724649	-0.464647	Intact
ENSG00000177272	6.74234	1.69e-05	0.000147977	0.725475	-0.463002	Intact
ENSG00000130988	7.14554	5.67e-07	8.07e-06	0.725488	-0.462977	Intact
ENSG00000075043	7.70365	2.35e-13	2.94e-11	0.726253	-0.461455	Intact
ENSG00000156689	5.19679	0.000326951	0.00177928	0.726479	-0.461006	Intact
ENSG00000115556	5.28136	6.56e-08	1.25e-06	0.726994	-0.459985	Intact
ENSG00000145506	6.05899	6.34e-13	6.6e-11	0.72722	-0.459537	Intact
ENSG00000273727	5.0081	1.13e-05	0.000105003	0.727379	-0.45922	Intact
ENSG00000175832	5.92431	2.65e-10	1.15e-08	0.727589	-0.458804	Intact
ENSG00000182575	6.30111	1.69e-09	5.56e-08	0.728285	-0.457424	Intact
ENSG00000120729	4.66892	0.00579459	0.0192616	0.728333	-0.457331	Intact
ENSG00000091513	6.95836	4.88e-05	0.000363204	0.728419	-0.45716	Intact
ENSG00000065154	7.81785	1.82e-13	2.36e-11	0.728826	-0.456354	Intact
ENSG00000064195	5.45749	5.69e-05	0.00041367	0.728909	-0.456189	Intact
ENSG00000128482	5.32991	1.55e-10	7.19e-09	0.729144	-0.455724	Intact
ENSG00000178222	7.08585	0.000697221	0.0033565	0.730073	-0.453888	Intact
ENSG00000166510	3.86564	5.88e-06	5.96e-05	0.730078	-0.453877	Intact
ENSG00000181458	5.27291	0.000105218	0.000690396	0.730104	-0.453827	Intact
ENSG00000110318	6.42238	2.9e-05	0.000233749	0.730118	-0.453799	Intact
ENSG00000153904	9.24697	2.13e-11	1.27e-09	0.7302	-0.453637	Intact
ENSG00000166105	5.47038	1.84e-08	4.18e-07	0.73048	-0.453084	Intact
ENSG00000197496	6.51732	1.31e-10	6.14e-09	0.730624	-0.452799	Intact
ENSG00000131409	8.24652	9.61e-06	9.09e-05	0.730655	-0.452738	Intact
ENSG00000185942	7.99085	6.7e-05	0.000473885	0.731571	-0.450931	Intact
ENSG00000154678	7.79567	0.000844725	0.00391857	0.73201	-0.450065	Intact
ENSG00000186838	5.42051	3.26e-18	2.08e-15	0.732034	-0.450018	Intact
ENSG00000213398	7.04968	5.04e-07	7.29e-06	0.732329	-0.449437	Intact
ENSG00000169330	6.4683	2.13e-07	3.49e-06	0.733014	-0.448087	Intact
ENSG00000144460	6.96671	1.25e-05	0.000114143	0.733078	-0.447961	Intact
ENSG00000176049	7.48015	0.000214651	0.00125186	0.733128	-0.447864	Intact
ENSG00000139926	6.56815	3.62e-10	1.5e-08	0.733823	-0.446495	Intact
ENSG00000101638	6.46059	9.17e-06	8.73e-05	0.733889	-0.446366	Intact
ENSG00000138685	6.9411	4.31e-10	1.73e-08	0.734926	-0.444329	Intact
ENSG00000183287	4.20356	6.45e-06	6.45e-05	0.734938	-0.444306	Intact
ENSG00000164418	8.15955	0.00208477	0.00830276	0.735002	-0.44418	Intact
ENSG00000180340	7.13375	5.41e-13	5.86e-11	0.735477	-0.443248	Intact
ENSG00000186815	8.59518	6.39e-13	6.62e-11	0.735733	-0.442745	Intact
ENSG00000143469	8.90337	1.75e-11	1.07e-09	0.735867	-0.442483	Intact
ENSG00000155760	7.37546	0.000558419	0.00278323	0.735976	-0.442269	Intact
ENSG00000134627	6.5102	6.84e-07	9.39e-06	0.736	-0.442223	Intact
ENSG00000255690	6.19159	1.9e-07	3.15e-06	0.736062	-0.4421	Intact
ENSG00000163749	5.47279	9.69e-10	3.48e-08	0.736108	-0.44201	Intact
ENSG00000157227	7.13949	2.5e-08	5.48e-07	0.736203	-0.441825	Intact
ENSG00000132849	7.79211	2.12e-06	2.5e-05	0.736316	-0.441604	Intact
ENSG00000197635	5.07429	0.000204693	0.00120199	0.736752	-0.44075	Intact
ENSG00000071967	7.6113	0.000482365	0.00245598	0.737223	-0.439827	Intact
ENSG00000101144	6.49405	0.000435145	0.00225764	0.737347	-0.439584	Intact
ENSG00000164434	6.46829	0.000149591	0.000930097	0.737408	-0.439464	Intact
ENSG00000095637	8.07472	1.94e-09	6.33e-08	0.737432	-0.439419	Intact
ENSG00000185070	7.09326	0.00045615	0.00234808	0.737523	-0.439239	Intact
ENSG00000141480	8.64327	1.14e-15	2.83e-13	0.737684	-0.438925	Intact
ENSG00000157514	7.96577	2.01e-11	1.21e-09	0.737764	-0.438769	Intact
ENSG00000164920	4.63027	7.17e-06	7.08e-05	0.738121	-0.43807	Intact
ENSG00000120057	5.9244	0.000754069	0.00357936	0.738175	-0.437965	Intact
ENSG00000183798	5.52031	9.74e-08	1.78e-06	0.738226	-0.437866	Intact
ENSG00000196277	5.33533	2.36e-06	2.75e-05	0.73829	-0.43774	Intact
ENSG00000182175	7.82623	3.76e-10	1.55e-08	0.738608	-0.43712	Intact
ENSG00000008196	5.12539	5.69e-08	1.11e-06	0.738662	-0.437013	Intact
ENSG00000091129	8.7922	0.000476158	0.00243081	0.738748	-0.436847	Intact
ENSG00000135919	7.05922	1.99e-05	0.000168844	0.738978	-0.436396	Intact
ENSG00000103034	8.73676	3.58e-07	5.48e-06	0.739166	-0.436029	Intact
ENSG00000132872	10.4602	0.000404207	0.00212864	0.739245	-0.435876	Intact
ENSG00000149243	7.41667	3.33e-09	9.86e-08	0.739873	-0.43465	Intact
ENSG00000204335	6.38217	3.89e-05	0.000299269	0.740158	-0.434095	Intact
ENSG00000072422	7.57015	1.75e-08	4.03e-07	0.740303	-0.433811	Intact
ENSG00000157570	8.00299	0.00286743	0.010831	0.740412	-0.4336	Intact
ENSG00000198848	5.83026	2.29e-05	0.000191298	0.740445	-0.433536	Intact
ENSG00000175928	10.1181	1.2e-06	1.52e-05	0.740691	-0.433057	Intact
ENSG00000139865	3.78262	0.000109758	0.000715809	0.741512	-0.431459	Intact
ENSG00000166250	6.15583	0.000219139	0.0012747	0.741891	-0.43072	Intact
ENSG00000114993	7.06037	4.36e-12	3.18e-10	0.742189	-0.430142	Intact
ENSG00000153233	8.02194	0.0110174	0.032713	0.742429	-0.429675	Intact
ENSG00000136068	7.98009	9.31e-11	4.61e-09	0.74255	-0.429439	Intact
ENSG00000197712	7.49019	9.15e-09	2.32e-07	0.742964	-0.428636	Intact
ENSG00000146530	4.67522	0.000404793	0.00212959	0.743145	-0.428285	Intact
ENSG00000148798	10.7708	4.32e-11	2.35e-09	0.743404	-0.427782	Intact
ENSG00000169594	5.10146	0.000281993	0.00156909	0.743695	-0.427218	Intact
ENSG00000154760	6.62529	0.00323716	0.0119865	0.743987	-0.426651	Intact
ENSG00000173258	7.40049	2.91e-09	8.88e-08	0.744102	-0.426427	Intact
ENSG00000183044	7.45738	3.64e-07	5.55e-06	0.74431	-0.426025	Intact
ENSG00000149972	5.01835	0.000513671	0.00258842	0.744461	-0.425733	Intact
ENSG00000162599	11.0759	3.73e-06	4.06e-05	0.745027	-0.424634	Intact
ENSG00000156299	8.52686	2.17e-07	3.55e-06	0.74586	-0.423023	Intact
ENSG00000144152	7.01542	3.3e-09	9.79e-08	0.746297	-0.422178	Intact
ENSG00000103460	8.76895	0.000229239	0.00132158	0.746476	-0.421832	Intact
ENSG00000120318	6.67486	5.59e-09	1.51e-07	0.746555	-0.421679	Intact
ENSG00000173175	7.45203	7.56e-08	1.42e-06	0.746827	-0.421154	Intact
ENSG00000166394	5.42839	0.000153593	0.000948811	0.746901	-0.421011	Intact
ENSG00000074211	7.15084	0.0150191	0.0418973	0.747049	-0.420726	Intact
ENSG00000196159	8.42673	6.19e-05	0.00044433	0.747154	-0.420522	Intact
ENSG00000118432	7.71374	0.000272201	0.0015223	0.747344	-0.420157	Intact
ENSG00000140848	8.1975	6.51e-09	1.73e-07	0.747362	-0.420122	Intact
ENSG00000016402	4.59681	3.09e-09	9.29e-08	0.747501	-0.419852	Intact
ENSG00000163288	6.69297	0.000344698	0.00185902	0.747736	-0.419399	Intact
ENSG00000135643	8.80664	7.12e-14	1e-11	0.748059	-0.418775	Intact
ENSG00000137872	9.56787	2.4e-07	3.85e-06	0.748163	-0.418575	Intact
ENSG00000139200	6.95622	5.64e-10	2.16e-08	0.74842	-0.418079	Intact
ENSG00000159248	7.6835	3.78e-05	0.000292333	0.748667	-0.417603	Intact
ENSG00000162493	7.10266	0.00106972	0.00476872	0.748785	-0.417376	Intact
ENSG00000180626	8.30193	3.02e-16	9.92e-14	0.748936	-0.417085	Intact
ENSG00000166147	7.24081	4.83e-05	0.000360001	0.749102	-0.416766	Intact
ENSG00000167720	8.45377	3.81e-13	4.29e-11	0.749305	-0.416374	Intact
ENSG00000108984	7.91225	1.59e-05	0.000140539	0.750171	-0.414708	Intact
ENSG00000109819	6.43271	1.92e-06	2.3e-05	0.750207	-0.41464	Intact
ENSG00000155093	7.51282	2.06e-10	9.25e-09	0.75029	-0.414481	Intact
ENSG00000153406	6.9108	2.66e-12	2.13e-10	0.750725	-0.413644	Intact
ENSG00000166265	7.47133	0.00944395	0.0288644	0.750836	-0.41343	Intact
ENSG00000148180	7.98428	1.9e-05	0.000162712	0.750844	-0.413415	Intact
ENSG00000101198	6.07751	8.03e-05	0.000550482	0.75147	-0.412212	Intact
ENSG00000159784	7.08995	1.43e-06	1.78e-05	0.751523	-0.412111	Intact
ENSG00000135740	6.3096	1.5e-11	9.25e-10	0.751944	-0.411303	Intact
ENSG00000136531	7.01498	0.00288996	0.0109005	0.751945	-0.4113	Intact
ENSG00000170915	6.90625	1.3e-14	2.27e-12	0.752682	-0.409888	Intact
ENSG00000151883	6.48849	1.46e-05	0.000130051	0.753088	-0.409109	Intact
ENSG00000149633	5.70716	2.72e-11	1.58e-09	0.753354	-0.4086	Intact
ENSG00000070882	6.23268	5.97e-05	0.00043048	0.753574	-0.408179	Intact
ENSG00000131196	6.25953	0.000695186	0.00334746	0.753588	-0.408152	Intact
ENSG00000170049	6.48927	1.22e-11	7.8e-10	0.754091	-0.40719	Intact
ENSG00000123360	6.56931	1.45e-05	0.000129666	0.754124	-0.407126	Intact
ENSG00000146521	5.45452	2.58e-06	2.97e-05	0.754267	-0.406853	Intact
ENSG00000183018	7.41963	9.29e-05	0.000620906	0.754285	-0.406819	Intact
ENSG00000170271	6.91616	0.000545398	0.00272608	0.754313	-0.406765	Intact
ENSG00000106665	7.71023	1.07e-07	1.92e-06	0.754318	-0.406755	Intact
ENSG00000158560	8.90421	0.00434589	0.0152487	0.754361	-0.406672	Intact
ENSG00000212766	3.70103	0.00031537	0.00172653	0.7546	-0.406216	Intact
ENSG00000100979	8.62472	1.25e-05	0.000114515	0.754746	-0.405937	Intact
ENSG00000152784	9.19705	6.73e-08	1.28e-06	0.754891	-0.40566	Intact
ENSG00000108947	6.65234	3.29e-13	3.82e-11	0.754925	-0.405595	Intact
ENSG00000196074	4.95614	6.4e-06	6.41e-05	0.755091	-0.405277	Intact
ENSG00000152154	9.73629	2.19e-06	2.57e-05	0.755157	-0.405151	Intact
ENSG00000206878	5.64187	0.00197743	0.00794448	0.755248	-0.404977	Intact
ENSG00000135406	6.15383	9.83e-05	0.000652983	0.755309	-0.404861	Intact
ENSG00000173114	8.76224	0.000220595	0.0012814	0.755444	-0.404604	Intact
ENSG00000120885	9.71841	0.000145146	0.000909455	0.755857	-0.403815	Intact
ENSG00000106571	5.54274	0.00179497	0.0073433	0.756101	-0.403349	Intact
ENSG00000175895	7.18129	2.85e-06	3.22e-05	0.756465	-0.402655	Intact
ENSG00000177301	6.43201	4.99e-06	5.2e-05	0.7567	-0.402206	Intact
ENSG00000166501	7.2907	0.00146334	0.00618887	0.756793	-0.40203	Intact
ENSG00000148120	6.27817	6.89e-14	9.79e-12	0.756799	-0.402018	Intact
ENSG00000120915	5.06616	3.36e-08	7.07e-07	0.75682	-0.401979	Intact
ENSG00000162437	7.95554	1.75e-07	2.93e-06	0.756983	-0.401667	Intact
ENSG00000188803	6.99989	0.0017245	0.00711593	0.75702	-0.401597	Intact
ENSG00000008118	6.28926	6.24e-05	0.000446813	0.757268	-0.401124	Intact
ENSG00000167107	4.51695	3.71e-08	7.67e-07	0.757531	-0.400623	Intact
ENSG00000089225	5.97233	0.00692468	0.0223675	0.757556	-0.400576	Intact
ENSG00000163412	7.42738	5.34e-07	7.66e-06	0.757738	-0.40023	Intact
ENSG00000182256	6.68221	0.0181111	0.0486199	0.75795	-0.399825	Intact
ENSG00000079739	7.84159	0.000191821	0.00113944	0.758555	-0.398675	Intact
ENSG00000164039	5.7894	6.22e-05	0.000445963	0.758611	-0.398569	Intact
ENSG00000013293	8.18976	4.4e-05	0.000332558	0.758626	-0.398539	Intact
ENSG00000109686	7.53288	3.78e-07	5.7e-06	0.758657	-0.39848	Intact
ENSG00000142156	8.60641	2.16e-12	1.79e-10	0.758959	-0.397906	Intact
ENSG00000087076	5.16698	4.96e-08	9.87e-07	0.759309	-0.397241	Intact
ENSG00000145335	8.99052	0.00048336	0.00245985	0.759532	-0.396818	Intact
ENSG00000124313	6.70911	2.57e-12	2.07e-10	0.759613	-0.396663	Intact
ENSG00000108590	8.30874	5.52e-17	2.32e-14	0.759986	-0.395956	Intact
ENSG00000089116	5.61332	0.00517625	0.0175927	0.760016	-0.395898	Intact
ENSG00000100228	6.68249	3.89e-08	7.96e-07	0.760022	-0.395887	Intact
ENSG00000143416	7.07601	5.3e-06	5.47e-05	0.760212	-0.395527	Intact
ENSG00000181722	10.0189	5.75e-09	1.55e-07	0.760252	-0.39545	Intact
ENSG00000078549	8.36574	0.000237499	0.00136049	0.760377	-0.395214	Intact
ENSG00000134376	5.69377	0.00379506	0.0136718	0.7607	-0.3946	Intact
ENSG00000126217	7.93849	5.54e-14	8.09e-12	0.760738	-0.394528	Intact
ENSG00000132669	8.63695	1.86e-11	1.13e-09	0.76132	-0.393425	Intact
ENSG00000166793	5.74734	1.14e-08	2.78e-07	0.762461	-0.391264	Intact
ENSG00000005108	8.45613	0.000366358	0.00195875	0.762514	-0.391165	Intact
ENSG00000074356	9.04731	5.36e-16	1.55e-13	0.762728	-0.39076	Intact
ENSG00000197461	6.79602	0.00261779	0.0100249	0.762999	-0.390247	Intact
ENSG00000183087	6.4618	2.51e-09	7.82e-08	0.763018	-0.390212	Intact
ENSG00000173253	3.92381	1.48e-06	1.83e-05	0.763216	-0.389837	Intact
ENSG00000132141	5.71277	2.51e-13	3.07e-11	0.763305	-0.389669	Intact
ENSG00000131435	6.5765	1.25e-07	2.2e-06	0.763733	-0.388859	Intact
ENSG00000162595	6.05827	0.00441912	0.0154592	0.763921	-0.388505	Intact
ENSG00000021826	5.42891	6.37e-05	0.000454929	0.764178	-0.388019	Intact
ENSG00000125430	5.11628	4.86e-05	0.000361476	0.764346	-0.387702	Intact
ENSG00000206341	5.67186	2.4e-08	5.29e-07	0.764348	-0.387699	Intact
ENSG00000144824	5.7935	4.2e-06	4.48e-05	0.764676	-0.387079	Intact
ENSG00000133121	7.74201	1e-06	1.31e-05	0.765001	-0.386466	Intact
ENSG00000138411	8.36273	1.89e-05	0.000161891	0.765026	-0.386419	Intact
ENSG00000115266	6.79991	5.27e-10	2.05e-08	0.765172	-0.386145	Intact
ENSG00000105251	6.6512	1.85e-07	3.08e-06	0.765245	-0.386007	Intact
ENSG00000178104	9.15384	4.57e-08	9.21e-07	0.765356	-0.385797	Intact
ENSG00000132000	5.61259	3.03e-12	2.35e-10	0.765384	-0.385744	Intact
ENSG00000162913	5.80616	1.57e-12	1.38e-10	0.765595	-0.385346	Intact
ENSG00000167216	6.47778	1.05e-12	9.69e-11	0.765672	-0.385202	Intact
ENSG00000180354	8.20366	4.08e-17	1.82e-14	0.765694	-0.385161	Intact
ENSG00000179242	6.40392	8.09e-06	7.84e-05	0.76587	-0.384829	Intact
ENSG00000106686	5.94314	1.8e-10	8.2e-09	0.766313	-0.383994	Intact
ENSG00000161791	8.32786	3.55e-12	2.71e-10	0.76651	-0.383624	Intact
ENSG00000214548	7.221	7.22e-05	0.000504619	0.766522	-0.383601	Intact
ENSG00000105928	7.05981	0.000135332	0.000856385	0.766583	-0.383486	Intact
ENSG00000152527	5.79525	0.000244469	0.00139314	0.766613	-0.38343	Intact
ENSG00000214595	6.63978	4.12e-06	4.4e-05	0.766915	-0.382862	Intact
ENSG00000107295	9.22862	0.000565675	0.00281405	0.767229	-0.38227	Intact
ENSG00000147852	6.69809	2.57e-06	2.96e-05	0.767377	-0.381993	Intact
ENSG00000025423	4.58153	3.82e-10	1.56e-08	0.767412	-0.381928	Intact
ENSG00000114446	8.33072	0.000263796	0.00148504	0.767527	-0.38171	Intact
ENSG00000261308	5.72045	0.000306207	0.00168118	0.767587	-0.381599	Intact
ENSG00000122543	5.07653	7.53e-06	7.38e-05	0.767592	-0.381589	Intact
ENSG00000120162	7.39143	2.46e-05	0.000202969	0.767886	-0.381036	Intact
ENSG00000213983	7.39853	1.89e-16	6.42e-14	0.768106	-0.380623	Intact
ENSG00000134569	6.63776	0.000914807	0.00419371	0.768225	-0.380399	Intact
ENSG00000167037	6.71334	2.92e-07	4.6e-06	0.768243	-0.380365	Intact
ENSG00000090975	6.968	4.98e-10	1.96e-08	0.768617	-0.379662	Intact
ENSG00000112218	5.44899	0.00275677	0.0104898	0.768647	-0.379608	Intact
ENSG00000163406	6.48695	8.03e-07	1.08e-05	0.768842	-0.379241	Intact
ENSG00000085871	6.95283	2.25e-12	1.86e-10	0.768956	-0.379026	Intact
ENSG00000256043	5.93955	3.88e-11	2.15e-09	0.768968	-0.379005	Intact
ENSG00000126709	8.6763	2.05e-06	2.43e-05	0.76907	-0.378812	Intact
ENSG00000175826	8.58376	8.87e-15	1.64e-12	0.769074	-0.378806	Intact
ENSG00000129514	5.57998	0.00181524	0.0074147	0.770244	-0.376613	Intact
ENSG00000130287	7.68472	0.00071999	0.00344795	0.770296	-0.376516	Intact
ENSG00000119715	5.0939	0.000135288	0.000856361	0.770593	-0.375959	Intact
ENSG00000092969	7.45202	0.0141234	0.0399117	0.770643	-0.375865	Intact
ENSG00000005961	6.39838	2.15e-06	2.53e-05	0.770727	-0.375708	Intact
ENSG00000255398	4.22763	0.000551669	0.00275219	0.771024	-0.375151	Intact
ENSG00000099365	7.29699	0.000127754	0.000815791	0.771047	-0.375109	Intact
ENSG00000124508	6.71086	2.54e-09	7.89e-08	0.77169	-0.373907	Intact
ENSG00000163596	8.35704	8.08e-15	1.53e-12	0.771701	-0.373887	Intact
ENSG00000114805	6.91255	0.00702196	0.0226261	0.771771	-0.373755	Intact
ENSG00000131094	6.94563	8.75e-05	0.000590441	0.771831	-0.373643	Intact
ENSG00000198075	6.51886	0.000479355	0.0024442	0.772207	-0.372941	Intact
ENSG00000140022	6.21477	8.82e-08	1.63e-06	0.772283	-0.372799	Intact
ENSG00000143850	7.78055	8.87e-05	0.000596735	0.772415	-0.372552	Intact
ENSG00000150051	4.79827	1.32e-06	1.67e-05	0.77244	-0.372505	Intact
ENSG00000166573	4.23065	0.000144172	0.00090443	0.772517	-0.372361	Intact
ENSG00000014257	4.25128	2.99e-06	3.35e-05	0.772581	-0.372242	Intact
ENSG00000158747	7.52633	6.46e-05	0.000460315	0.772742	-0.371941	Intact
ENSG00000071909	4.3574	0.000404087	0.00212854	0.772907	-0.371632	Intact
ENSG00000158296	6.8648	0.00250997	0.00968077	0.772918	-0.371613	Intact
ENSG00000156925	7.46329	0.00842752	0.0262773	0.773253	-0.370988	Intact
ENSG00000072778	8.8972	4.99e-15	9.9e-13	0.773569	-0.370399	Intact
ENSG00000033170	7.90465	1.66e-07	2.8e-06	0.773723	-0.370111	Intact
ENSG00000069535	6.67466	1.1e-05	0.000102213	0.773962	-0.369666	Intact
ENSG00000182747	4.89656	4.09e-06	4.38e-05	0.774255	-0.369119	Intact
ENSG00000107771	9.64723	1.21e-12	1.09e-10	0.774285	-0.369063	Intact
ENSG00000171766	8.82726	1.79e-05	0.000154999	0.774358	-0.368928	Intact
ENSG00000173452	4.75009	0.000156813	0.000964836	0.774391	-0.368865	Intact
ENSG00000185920	9.52766	9.19e-05	0.000615433	0.774557	-0.368556	Intact
ENSG00000128591	6.77497	0.00241096	0.00936764	0.774559	-0.368554	Intact
ENSG00000131016	7.45202	5.71e-07	8.11e-06	0.775101	-0.367544	Intact
ENSG00000131095	9.17223	0.00620217	0.0203971	0.77516	-0.367434	Intact
ENSG00000163449	6.29163	3.09e-06	3.44e-05	0.77534	-0.367098	Intact
ENSG00000117643	6.75817	1.2e-08	2.91e-07	0.775347	-0.367086	Intact
ENSG00000183778	4.99787	3.11e-06	3.46e-05	0.77535	-0.367081	Intact
ENSG00000182782	6.07396	5.71e-05	0.000414225	0.7755	-0.366801	Intact
ENSG00000011295	8.89984	2.25e-16	7.5e-14	0.775585	-0.366643	Intact
ENSG00000250305	8.06642	6.09e-06	6.14e-05	0.775671	-0.366483	Intact
ENSG00000128311	6.85641	2.85e-08	6.17e-07	0.775855	-0.366141	Intact
ENSG00000116793	7.84546	4.41e-11	2.38e-09	0.77588	-0.366094	Intact
ENSG00000183117	5.80598	0.00673508	0.021876	0.775917	-0.366025	Intact
ENSG00000138613	6.85457	2.29e-10	1.01e-08	0.77592	-0.366019	Intact
ENSG00000120833	7.18392	9.45e-06	8.95e-05	0.776008	-0.365857	Intact
ENSG00000144677	7.6754	3.81e-07	5.74e-06	0.776185	-0.365527	Intact
ENSG00000198879	6.95892	4.16e-07	6.17e-06	0.776541	-0.364867	Intact
ENSG00000161509	6.38282	2.11e-05	0.000178117	0.776585	-0.364785	Intact
ENSG00000124780	5.69367	0.000207575	0.00121652	0.77677	-0.364442	Intact
ENSG00000125170	6.90762	3.12e-08	6.63e-07	0.776877	-0.364242	Intact
ENSG00000169908	8.66635	0.00010673	0.000698946	0.776878	-0.364241	Intact
ENSG00000183077	7.51101	4.51e-08	9.11e-07	0.777354	-0.363355	Intact
ENSG00000196090	5.43896	0.000130369	0.000828217	0.777456	-0.363168	Intact
ENSG00000128602	7.38997	1.42e-12	1.26e-10	0.777553	-0.362987	Intact
ENSG00000165061	8.28516	0.0153012	0.0425768	0.777577	-0.362942	Intact
ENSG00000001461	7.36438	6.62e-09	1.75e-07	0.777668	-0.362773	Intact
ENSG00000065882	8.90276	1.2e-12	1.09e-10	0.777878	-0.362385	Intact
ENSG00000102053	4.94375	9.48e-05	0.000632163	0.778248	-0.361698	Intact
ENSG00000053438	11.496	0.00629372	0.0206594	0.778274	-0.36165	Intact
ENSG00000167011	4.75489	8.47e-08	1.58e-06	0.77846	-0.361306	Intact
ENSG00000164645	4.05934	6.38e-07	8.91e-06	0.778677	-0.360902	Intact
ENSG00000128641	8.4646	0.000619347	0.00303369	0.778759	-0.360752	Intact
ENSG00000197705	5.13314	0.000219442	0.00127597	0.778925	-0.360444	Intact
ENSG00000143195	5.94157	0.000150078	0.000932574	0.779003	-0.360298	Intact
ENSG00000081803	6.8474	0.0138051	0.0391491	0.779147	-0.360033	Intact
ENSG00000179029	6.82753	1.8e-13	2.35e-11	0.779335	-0.359684	Intact
ENSG00000165349	5.53912	1.52e-06	1.88e-05	0.779514	-0.359354	Intact
ENSG00000156395	6.09475	0.000304642	0.0016739	0.77972	-0.358972	Intact
ENSG00000116106	7.29453	0.00286341	0.0108233	0.779786	-0.35885	Intact
ENSG00000129625	10.0824	9.75e-16	2.5e-13	0.78039	-0.357733	Intact
ENSG00000111846	5.74858	0.000231807	0.001334	0.780484	-0.357559	Intact
ENSG00000043355	8.28399	0.0165796	0.0453658	0.780654	-0.357245	Intact
ENSG00000183929	6.12642	0.00441851	0.0154592	0.780671	-0.357213	Intact
ENSG00000102109	7.88263	1.56e-11	9.63e-10	0.780735	-0.357094	Intact
ENSG00000143882	5.10936	7.78e-05	0.000535466	0.780922	-0.356749	Intact
ENSG00000169499	7.00326	1.97e-09	6.36e-08	0.780961	-0.356678	Intact
ENSG00000242732	7.01853	4.23e-09	1.2e-07	0.781091	-0.356438	Intact
ENSG00000156103	7.46909	0.00109949	0.00488075	0.781614	-0.355472	Intact
ENSG00000040531	6.29331	1.56e-17	7.43e-15	0.7817	-0.355312	Intact
ENSG00000127124	7.09762	1.98e-09	6.36e-08	0.781745	-0.35523	Intact
ENSG00000130518	7.51972	3.4e-09	1e-07	0.781781	-0.355163	Intact
ENSG00000074370	6.21566	0.00101133	0.00455379	0.782087	-0.354598	Intact
ENSG00000110900	7.52873	0.00016813	0.00102447	0.782115	-0.354548	Intact
ENSG00000126878	6.66154	2.62e-07	4.17e-06	0.782131	-0.354517	Intact
ENSG00000128833	6.07994	3.17e-05	0.000252714	0.782141	-0.3545	Intact
ENSG00000159714	7.11916	4.45e-19	3.74e-16	0.782761	-0.353356	Intact
ENSG00000102383	8.43507	7.92e-08	1.48e-06	0.783066	-0.352795	Intact
ENSG00000145020	7.02241	4.99e-11	2.63e-09	0.783508	-0.351981	Intact
ENSG00000143032	6.81797	0.00951178	0.0290169	0.783653	-0.351713	Intact
ENSG00000112175	4.44399	0.0186868	0.0498536	0.783884	-0.351289	Intact
ENSG00000085741	5.41197	6.17e-06	6.21e-05	0.784115	-0.350863	Intact
ENSG00000124205	5.77671	1.62e-06	1.98e-05	0.784174	-0.350754	Intact
ENSG00000170043	8.52035	5.08e-15	9.97e-13	0.784343	-0.350444	Intact
ENSG00000138162	6.52434	8.74e-10	3.15e-08	0.784537	-0.350086	Intact
ENSG00000198133	5.91323	0.00136714	0.0058598	0.784935	-0.349355	Intact
ENSG00000101333	7.78363	3.74e-05	0.000289983	0.78499	-0.349255	Intact
ENSG00000134780	7.11973	0.000833838	0.00387579	0.785001	-0.349234	Intact
ENSG00000141510	8.62783	2.38e-05	0.00019747	0.78521	-0.348849	Intact
ENSG00000146122	6.08914	2.05e-06	2.42e-05	0.785461	-0.348389	Intact
ENSG00000053254	9.26277	8.61e-14	1.18e-11	0.785789	-0.347787	Intact
ENSG00000107551	7.70607	1.77e-05	0.000153789	0.785851	-0.347672	Intact
ENSG00000276399	4.96406	0.000416563	0.00217681	0.785855	-0.347665	Intact
ENSG00000144583	7.66422	2.33e-05	0.000194173	0.785999	-0.347401	Intact
ENSG00000204131	7.23424	0.000438055	0.00226882	0.78604	-0.347325	Intact
ENSG00000174282	7.82157	1.82e-15	4.16e-13	0.786388	-0.346686	Intact
ENSG00000182247	7.7988	0.000135993	0.000860046	0.786547	-0.346395	Intact
ENSG00000132563	7.32875	1.05e-10	5.1e-09	0.786598	-0.346302	Intact
ENSG00000156298	9.29049	3.64e-05	0.000284031	0.786773	-0.34598	Intact
ENSG00000198542	6.73354	0.00186201	0.00757485	0.786901	-0.345746	Intact
ENSG00000240205	4.31727	0.000405866	0.00213257	0.787042	-0.345487	Intact
ENSG00000130294	9.32233	1.72e-05	0.000149684	0.787116	-0.345351	Intact
ENSG00000171533	7.75058	8.34e-08	1.55e-06	0.78733	-0.34496	Intact
ENSG00000108523	7.61038	5.82e-18	3.22e-15	0.787386	-0.344857	Intact
ENSG00000085117	6.47945	1.89e-05	0.000161788	0.787844	-0.344018	Intact
ENSG00000145348	9.7874	8.6e-12	5.72e-10	0.787975	-0.343778	Intact
ENSG00000153446	6.6682	1.19e-06	1.51e-05	0.788111	-0.343529	Intact
ENSG00000046653	9.98045	5.01e-06	5.22e-05	0.788236	-0.343301	Intact
ENSG00000179409	6.58691	1.01e-14	1.83e-12	0.788281	-0.343218	Intact
ENSG00000144115	6.2334	2.57e-08	5.61e-07	0.788588	-0.342656	Intact
ENSG00000180875	6.49615	0.00850426	0.0264812	0.788823	-0.342227	Intact
ENSG00000166432	8.3821	1.87e-12	1.59e-10	0.788921	-0.342046	Intact
ENSG00000010404	10.2005	1.79e-08	4.11e-07	0.789054	-0.341804	Intact
ENSG00000173262	5.19162	4.9e-08	9.78e-07	0.789078	-0.341759	Intact
ENSG00000077585	8.74725	3.23e-09	9.63e-08	0.789274	-0.341402	Intact
ENSG00000196782	9.63201	1.96e-09	6.34e-08	0.789362	-0.341241	Intact
ENSG00000106258	5.68944	0.000370572	0.00197877	0.789444	-0.341091	Intact
ENSG00000197555	8.35992	0.000102733	0.000676773	0.789582	-0.34084	Intact
ENSG00000185269	4.8402	7.74e-05	0.00053285	0.789764	-0.340506	Intact
ENSG00000119714	5.5119	1.06e-05	9.96e-05	0.790073	-0.339943	Intact
ENSG00000164107	4.56687	5.04e-05	0.000373852	0.790208	-0.339695	Intact
ENSG00000154639	10.5823	0.000148045	0.000923491	0.790299	-0.33953	Intact
ENSG00000198920	7.68448	5.87e-13	6.24e-11	0.790446	-0.339261	Intact
ENSG00000112796	5.8304	0.000226294	0.00130728	0.790731	-0.338742	Intact
ENSG00000163531	7.84731	7.81e-06	7.6e-05	0.79098	-0.338287	Intact
ENSG00000110786	6.86751	0.00401455	0.0143154	0.791002	-0.338247	Intact
ENSG00000167693	7.93188	0.0018649	0.00758218	0.791125	-0.338022	Intact
ENSG00000176399	5.53936	0.0142458	0.0401717	0.791556	-0.337237	Intact
ENSG00000164307	7.02255	1.94e-14	3.21e-12	0.791748	-0.336887	Intact
ENSG00000159239	6.04324	3.79e-17	1.73e-14	0.79175	-0.336884	Intact
ENSG00000079102	8.79168	0.00656437	0.0214308	0.791926	-0.336563	Intact
ENSG00000176225	8.33885	2.72e-05	0.000221916	0.792233	-0.336004	Intact
ENSG00000171951	7.34934	0.0020955	0.008336	0.792439	-0.335628	Intact
ENSG00000184524	6.93898	7.57e-06	7.41e-05	0.792649	-0.335245	Intact
ENSG00000189350	6.04014	0.000142632	0.00089584	0.79268	-0.33519	Intact
ENSG00000187730	6.13863	1.81e-05	0.000156308	0.792878	-0.334829	Intact
ENSG00000151338	5.9741	0.00214323	0.00850338	0.792995	-0.334617	Intact
ENSG00000172379	8.81462	6.27e-18	3.29e-15	0.793368	-0.333938	Intact
ENSG00000188732	7.09686	8.55e-08	1.59e-06	0.793398	-0.333884	Intact
ENSG00000165138	7.17596	5.2e-08	1.03e-06	0.793421	-0.333842	Intact
ENSG00000167695	7.76978	9.55e-13	9.04e-11	0.793489	-0.333717	Intact
ENSG00000183032	4.41222	1.07e-06	1.38e-05	0.793612	-0.333494	Intact
ENSG00000150760	7.16372	0.000282199	0.00156945	0.793755	-0.333235	Intact
ENSG00000037042	8.23765	3.12e-11	1.78e-09	0.793802	-0.333149	Intact
ENSG00000106066	5.65395	1.89e-09	6.19e-08	0.794139	-0.332536	Intact
ENSG00000189423	8.73361	0.0100256	0.0303053	0.794579	-0.331738	Intact
ENSG00000166405	8.17328	3.79e-12	2.84e-10	0.794762	-0.331405	Intact
ENSG00000174238	9.83188	4.96e-12	3.53e-10	0.794787	-0.331359	Intact
ENSG00000176641	7.70105	0.00081876	0.00382427	0.794813	-0.331313	Intact
ENSG00000223258	5.29726	1.96e-06	2.33e-05	0.795067	-0.330852	Intact
ENSG00000113742	8.37796	8.58e-07	1.14e-05	0.795199	-0.330612	Intact
ENSG00000177791	4.26128	3.22e-10	1.35e-08	0.795495	-0.330076	Intact
ENSG00000132718	10.1099	3.73e-10	1.54e-08	0.795533	-0.330006	Intact
ENSG00000184454	5.43901	5.35e-05	0.000392576	0.795701	-0.329701	Intact
ENSG00000171551	5.34419	2.25e-06	2.64e-05	0.79581	-0.329504	Intact
ENSG00000108551	7.03908	2.38e-05	0.000197895	0.79593	-0.329287	Intact
ENSG00000136099	6.43382	0.00103126	0.00462965	0.79644	-0.328362	Intact
ENSG00000100249	3.87552	1.06e-07	1.92e-06	0.796645	-0.327991	Intact
ENSG00000100626	7.30512	1.24e-07	2.18e-06	0.796656	-0.327972	Intact
ENSG00000152672	7.30134	0.000132843	0.000842329	0.797022	-0.327309	Intact
ENSG00000180884	5.91213	4.29e-16	1.37e-13	0.797104	-0.327161	Intact
ENSG00000141040	6.83322	7.89e-12	5.3e-10	0.797127	-0.327119	Intact
ENSG00000188042	6.70165	0.000145303	0.000909899	0.797302	-0.326803	Intact
ENSG00000173040	4.72922	2.13e-05	0.000179686	0.797422	-0.326585	Intact
ENSG00000092051	6.5813	3.97e-10	1.61e-08	0.797722	-0.326041	Intact
ENSG00000166780	8.85368	4.79e-09	1.33e-07	0.797872	-0.325771	Intact
ENSG00000154229	7.63778	0.000104106	0.000684319	0.797968	-0.325597	Intact
ENSG00000178971	7.41746	2.13e-13	2.72e-11	0.797977	-0.325581	Intact
ENSG00000143147	7.26078	8.02e-09	2.06e-07	0.798029	-0.325486	Intact
ENSG00000151023	4.86612	5.36e-06	5.51e-05	0.79805	-0.325449	Intact
ENSG00000184486	6.62791	0.0152823	0.0425356	0.798316	-0.324969	Intact
ENSG00000186409	6.85851	1.81e-08	4.13e-07	0.798742	-0.324198	Intact
ENSG00000071073	8.24893	4.98e-07	7.22e-06	0.798816	-0.324065	Intact
ENSG00000074219	7.777	2.5e-05	0.000205755	0.799133	-0.323492	Intact
ENSG00000154040	6.38555	8.33e-09	2.13e-07	0.799292	-0.323206	Intact
ENSG00000104967	8.04264	4.34e-05	0.000328709	0.799316	-0.323162	Intact
ENSG00000108175	10.0185	3.65e-12	2.75e-10	0.799479	-0.322868	Intact
ENSG00000167699	7.72097	8.05e-13	8.06e-11	0.799648	-0.322563	Intact
ENSG00000115183	8.27459	0.000221128	0.00128343	0.799907	-0.322096	Intact
ENSG00000132359	7.86376	2.74e-06	3.11e-05	0.800149	-0.321659	Intact
ENSG00000002745	5.189	0.00342954	0.012566	0.800171	-0.32162	Intact
ENSG00000108187	7.30523	6.79e-09	1.79e-07	0.800201	-0.321566	Intact
ENSG00000116729	7.80749	0.000227082	0.00131039	0.800275	-0.321433	Intact
ENSG00000186854	5.03414	3.46e-06	3.8e-05	0.800477	-0.321067	Intact
ENSG00000162804	5.93262	7.32e-05	0.000509582	0.800568	-0.320903	Intact
ENSG00000165272	6.25672	0.000113938	0.000739104	0.800607	-0.320833	Intact
ENSG00000073464	7.7415	0.00108026	0.00480775	0.800676	-0.32071	Intact
ENSG00000207994	3.09208	4.93e-06	5.15e-05	0.800702	-0.320663	Intact
ENSG00000137857	5.68416	1.87e-06	2.25e-05	0.800708	-0.320652	Intact
ENSG00000126016	6.92708	4.12e-08	8.42e-07	0.800752	-0.320572	Intact
ENSG00000171303	7.48358	6.63e-05	0.00047019	0.800874	-0.320354	Intact
ENSG00000144476	5.72733	0.00240451	0.00934949	0.801402	-0.319402	Intact
ENSG00000151835	8.67166	1.68e-05	0.000146882	0.801595	-0.319054	Intact
ENSG00000202408	5.08175	1.44e-05	0.0001294	0.801704	-0.318859	Intact
ENSG00000008311	7.97606	3.3e-05	0.000261242	0.801827	-0.318637	Intact
ENSG00000176658	7.32426	1.53e-06	1.89e-05	0.801858	-0.318582	Intact
ENSG00000102043	6.16261	0.000180343	0.00108536	0.801884	-0.318535	Intact
ENSG00000185722	8.54842	2.39e-15	5.08e-13	0.80193	-0.318452	Intact
ENSG00000240771	9.03681	1.2e-14	2.13e-12	0.801943	-0.318429	Intact
ENSG00000164303	4.97186	6.32e-07	8.84e-06	0.802	-0.318325	Intact
ENSG00000015592	6.99696	0.00588703	0.0195225	0.802076	-0.318189	Intact
ENSG00000161243	5.943	1.07e-08	2.64e-07	0.802198	-0.317969	Intact
ENSG00000120645	6.64451	0.000766274	0.00362584	0.802266	-0.317847	Intact
ENSG00000170624	6.12596	0.0067759	0.021995	0.802386	-0.317632	Intact
ENSG00000211891	4.30099	0.000647962	0.00315402	0.802719	-0.317033	Intact
ENSG00000136052	6.88719	4.68e-05	0.000350066	0.802802	-0.316884	Intact
ENSG00000124006	6.95574	4.17e-14	6.26e-12	0.803264	-0.316054	Intact
ENSG00000134817	7.03969	0.00435383	0.0152689	0.803352	-0.315896	Intact
ENSG00000166068	8.0799	7.63e-10	2.81e-08	0.803799	-0.315093	Intact
ENSG00000099250	7.78392	0.00222566	0.00877085	0.803833	-0.315033	Intact
ENSG00000066923	6.4602	1.74e-06	2.1e-05	0.803839	-0.315022	Intact
ENSG00000166707	6.52807	1.86e-08	4.23e-07	0.803923	-0.314871	Intact
ENSG00000157214	6.78171	4.2e-05	0.000319614	0.803926	-0.314866	Intact
ENSG00000188316	6.05914	3.03e-05	0.000242678	0.80415	-0.314463	Intact
ENSG00000062038	6.38737	5.78e-06	5.87e-05	0.804273	-0.314242	Intact
ENSG00000197467	5.59535	6.15e-16	1.73e-13	0.804607	-0.313644	Intact
ENSG00000170571	4.71133	0.00445933	0.015574	0.804922	-0.31308	Intact
ENSG00000134532	7.70467	0.00443086	0.0154916	0.804953	-0.313024	Intact
ENSG00000165548	8.37547	0.00307516	0.0114873	0.805002	-0.312936	Intact
ENSG00000213071	5.79545	2.25e-08	4.97e-07	0.805095	-0.31277	Intact
ENSG00000101911	7.77385	7.83e-06	7.62e-05	0.805103	-0.312755	Intact
ENSG00000100784	7.17112	8.54e-09	2.18e-07	0.805128	-0.31271	Intact
ENSG00000166342	5.86765	0.0182939	0.0490043	0.805133	-0.312701	Intact
ENSG00000173320	8.72442	7.4e-06	7.27e-05	0.805165	-0.312643	Intact
ENSG00000137841	6.29602	1.14e-10	5.48e-09	0.805194	-0.312591	Intact
ENSG00000109787	8.99187	1.56e-07	2.66e-06	0.805199	-0.312583	Intact
ENSG00000165923	5.16678	1.25e-10	5.9e-09	0.805254	-0.312484	Intact
ENSG00000109654	9.01447	1.66e-07	2.8e-06	0.805441	-0.31215	Intact
ENSG00000140931	6.85229	0.000164201	0.00100373	0.805522	-0.312005	Intact
ENSG00000187595	6.32705	4.02e-10	1.62e-08	0.805698	-0.311689	Intact
ENSG00000108176	7.27703	0.000189203	0.00112771	0.805839	-0.311436	Intact
ENSG00000167874	8.00677	1.02e-07	1.86e-06	0.80597	-0.311202	Intact
ENSG00000139800	7.33924	0.00078035	0.00368084	0.806046	-0.311065	Intact
ENSG00000232699	6.29419	0.00012925	0.000822464	0.806091	-0.310986	Intact
ENSG00000109846	9.067	0.00107073	0.0047702	0.806205	-0.310781	Intact
ENSG00000100097	8.96339	0.00109158	0.00485175	0.806326	-0.310564	Intact
ENSG00000131831	6.22167	1.27e-06	1.61e-05	0.806388	-0.310453	Intact
ENSG00000200702	8.17584	3.11e-07	4.86e-06	0.806391	-0.310449	Intact
ENSG00000058866	7.7512	0.007554	0.0239948	0.806419	-0.310399	Intact
ENSG00000198939	8.09018	4.37e-09	1.24e-07	0.806772	-0.309767	Intact
ENSG00000131044	6.53466	9.09e-08	1.67e-06	0.806855	-0.309619	Intact
ENSG00000187630	5.97974	6.55e-05	0.000465082	0.807257	-0.308901	Intact
ENSG00000072849	7.96255	3.71e-14	5.7e-12	0.807428	-0.308594	Intact
ENSG00000183831	4.61952	0.000860007	0.00397543	0.807508	-0.308451	Intact
ENSG00000177370	8.42318	1.25e-14	2.21e-12	0.807618	-0.308256	Intact
ENSG00000198353	5.53774	0.000567067	0.00281965	0.807707	-0.308097	Intact
ENSG00000197948	5.72349	2.21e-07	3.59e-06	0.807759	-0.308003	Intact
ENSG00000018408	7.98701	0.000246008	0.00140001	0.807788	-0.307951	Intact
ENSG00000180769	6.53906	1.17e-07	2.08e-06	0.807804	-0.307922	Intact
ENSG00000144406	8.54268	1.03e-07	1.86e-06	0.807845	-0.30785	Intact
ENSG00000162733	7.28782	0.00358115	0.0130082	0.807904	-0.307745	Intact
ENSG00000267634	4.11534	0.00120082	0.00524855	0.807923	-0.307711	Intact
ENSG00000099256	9.18744	1.36e-08	3.2e-07	0.808025	-0.307529	Intact
ENSG00000088538	7.89961	0.0127389	0.0366497	0.808256	-0.307115	Intact
ENSG00000166750	7.30756	0.000139551	0.000878852	0.808425	-0.306814	Intact
ENSG00000182771	6.25572	0.00412834	0.0146261	0.808462	-0.306748	Intact
ENSG00000059804	8.01008	7.04e-05	0.00049474	0.808614	-0.306477	Intact
ENSG00000138606	8.04957	4.34e-08	8.79e-07	0.809	-0.305788	Intact
ENSG00000215788	7.99705	3.38e-07	5.23e-06	0.809016	-0.30576	Intact
ENSG00000196476	8.20585	7.17e-07	9.8e-06	0.80986	-0.304255	Intact
ENSG00000153094	7.42982	1.39e-07	2.41e-06	0.809864	-0.304248	Intact
ENSG00000100439	7.83255	1.06e-08	2.64e-07	0.810065	-0.303891	Intact
ENSG00000146416	7.74778	4.33e-09	1.22e-07	0.81013	-0.303775	Intact
ENSG00000099937	4.95804	0.000428032	0.00222733	0.810305	-0.303463	Intact
ENSG00000095321	7.98888	2.62e-09	8.05e-08	0.810351	-0.30338	Intact
ENSG00000221886	7.32225	8.99e-13	8.75e-11	0.810363	-0.303359	Intact
ENSG00000124920	5.60271	0.000290707	0.00160912	0.810421	-0.303257	Intact
ENSG00000087495	6.66922	0.000601797	0.00295875	0.810454	-0.303199	Intact
ENSG00000139679	6.4377	5.09e-05	0.000376789	0.810808	-0.302567	Intact
ENSG00000119782	7.38563	0.00160814	0.00670687	0.810821	-0.302545	Intact
ENSG00000154269	4.6419	1.43e-06	1.78e-05	0.810874	-0.30245	Intact
ENSG00000004975	7.2914	6.87e-13	6.95e-11	0.810903	-0.302399	Intact
ENSG00000178403	5.60258	0.000750745	0.00356519	0.810913	-0.302381	Intact
ENSG00000031081	6.63068	2.45e-05	0.000201963	0.811026	-0.30218	Intact
ENSG00000181804	5.94445	2.55e-06	2.95e-05	0.811125	-0.302004	Intact
ENSG00000119314	9.29354	3.36e-06	3.7e-05	0.811126	-0.302002	Intact
ENSG00000198598	5.73078	7.45e-07	1.01e-05	0.811222	-0.301832	Intact
ENSG00000086300	7.31428	8.57e-06	8.24e-05	0.811283	-0.301723	Intact
ENSG00000049246	7.89322	6.36e-06	6.38e-05	0.811423	-0.301474	Intact
ENSG00000088882	7.46442	2.52e-05	0.000207591	0.811526	-0.301291	Intact
ENSG00000156453	7.27232	1.86e-11	1.13e-09	0.811545	-0.301257	Intact
ENSG00000180537	7.9539	0.000961418	0.00437212	0.811608	-0.301145	Intact
ENSG00000177663	7.23649	7.87e-06	7.65e-05	0.811726	-0.300935	Intact
ENSG00000126562	4.68831	2.97e-07	4.67e-06	0.811772	-0.300854	Intact
ENSG00000104447	7.02881	0.00857453	0.0266682	0.811862	-0.300693	Intact
ENSG00000103876	5.79765	3.96e-07	5.94e-06	0.81191	-0.300609	Intact
ENSG00000187624	5.89654	2.38e-07	3.84e-06	0.811951	-0.300536	Intact
ENSG00000143387	8.49978	5.08e-07	7.34e-06	0.812007	-0.300435	Intact
ENSG00000266028	8.87659	1.77e-05	0.000153789	0.812055	-0.30035	Intact
ENSG00000210196	9.66742	0.000118386	0.000764097	0.812335	-0.299853	Intact
ENSG00000135502	7.24521	4.02e-07	6e-06	0.812392	-0.299751	Intact
ENSG00000108797	6.79069	4.08e-06	4.36e-05	0.812527	-0.299513	Intact
ENSG00000165801	6.92221	9.81e-17	3.68e-14	0.812571	-0.299433	Intact
ENSG00000199705	3.19321	1.22e-05	0.000112238	0.812586	-0.299408	Intact
ENSG00000076555	7.01603	1.13e-07	2.01e-06	0.812647	-0.299299	Intact
ENSG00000164022	7.15096	2.53e-05	0.000208127	0.812691	-0.299221	Intact
ENSG00000177363	4.84496	4.88e-11	2.58e-09	0.813185	-0.298345	Intact
ENSG00000069493	5.99605	4.33e-08	8.78e-07	0.813289	-0.298159	Intact
ENSG00000108352	7.69593	0.000301863	0.00166036	0.813529	-0.297734	Intact
ENSG00000219438	7.85388	2.11e-08	4.71e-07	0.813964	-0.296962	Intact
ENSG00000141503	8.0869	5.91e-10	2.26e-08	0.814077	-0.296763	Intact
ENSG00000168077	6.7652	0.000472435	0.00241629	0.814142	-0.296647	Intact
ENSG00000173193	6.1182	0.00015307	0.000946917	0.814148	-0.296637	Intact
ENSG00000145936	6.40029	0.000393509	0.00208064	0.814229	-0.296494	Intact
ENSG00000252199	7.44594	6.6e-07	9.11e-06	0.81425	-0.296456	Intact
ENSG00000086289	6.42185	1.63e-09	5.41e-08	0.814271	-0.29642	Intact
ENSG00000112379	6.8329	0.0030889	0.0115288	0.814342	-0.296294	Intact
ENSG00000156384	7.44077	1.34e-08	3.17e-07	0.814365	-0.296252	Intact
ENSG00000130413	6.68683	0.00504662	0.0172469	0.814466	-0.296074	Intact
ENSG00000141252	8.83333	6.4e-16	1.77e-13	0.814512	-0.295992	Intact
ENSG00000133028	7.67347	3.33e-11	1.87e-09	0.814645	-0.295757	Intact
ENSG00000077942	8.76487	0.000162093	0.000993728	0.814681	-0.295693	Intact
ENSG00000189067	8.1696	2.97e-08	6.37e-07	0.814742	-0.295585	Intact
ENSG00000176533	7.60054	0.000304881	0.00167478	0.814786	-0.295507	Intact
ENSG00000142227	6.89232	0.00149742	0.00631776	0.814858	-0.295379	Intact
ENSG00000254585	5.23082	3.26e-06	3.61e-05	0.815	-0.295128	Intact
ENSG00000206561	7.01568	5.93e-09	1.59e-07	0.815025	-0.295084	Intact
ENSG00000074527	6.81942	0.000281769	0.0015683	0.815062	-0.295018	Intact
ENSG00000139410	6.71939	8.05e-07	1.08e-05	0.815147	-0.294868	Intact
ENSG00000115902	7.47133	5.28e-06	5.45e-05	0.815154	-0.294855	Intact
ENSG00000105696	7.51494	0.000145403	0.000910169	0.815183	-0.294805	Intact
ENSG00000114923	7.44608	1.23e-11	7.8e-10	0.815188	-0.294795	Intact
ENSG00000124942	7.08814	0.00298374	0.0111881	0.8152	-0.294775	Intact
ENSG00000252995	6.50204	5.61e-05	0.000408252	0.815223	-0.294733	Intact
ENSG00000171928	7.00774	6.11e-08	1.18e-06	0.815225	-0.294729	Intact
ENSG00000132388	9.73738	6.01e-15	1.17e-12	0.815234	-0.294713	Intact
ENSG00000186532	7.20402	1.93e-15	4.28e-13	0.815244	-0.294696	Intact
ENSG00000177511	9.73562	2.9e-08	6.24e-07	0.81537	-0.294474	Intact
ENSG00000143878	8.41294	2.32e-06	2.71e-05	0.815684	-0.293917	Intact
ENSG00000124126	8.27512	0.00343262	0.0125751	0.815763	-0.293778	Intact
ENSG00000196338	8.05804	1.93e-05	0.000164679	0.815789	-0.293732	Intact
ENSG00000250510	8.03176	6.64e-05	0.000470696	0.815902	-0.293532	Intact
ENSG00000164543	8.16154	0.0040401	0.0143943	0.816112	-0.293162	Intact
ENSG00000152910	5.31176	0.00283244	0.010722	0.816843	-0.291869	Intact
ENSG00000164038	7.83577	0.00121267	0.00529597	0.816963	-0.291657	Intact
ENSG00000175745	8.85032	0.0101621	0.0306209	0.817057	-0.291492	Intact
ENSG00000151773	5.01168	1.2e-07	2.14e-06	0.817724	-0.290313	Intact
ENSG00000266714	6.95752	2.27e-05	0.000189708	0.817735	-0.290295	Intact
ENSG00000088832	6.53343	0.000109326	0.000713722	0.81799	-0.289845	Intact
ENSG00000108830	7.6628	0.0108599	0.0323505	0.81841	-0.289105	Intact
ENSG00000184205	7.54617	4.78e-08	9.58e-07	0.818497	-0.28895	Intact
ENSG00000072682	6.96642	0.00544542	0.0183168	0.818506	-0.288936	Intact
ENSG00000140682	6.79072	5.71e-05	0.000414363	0.818589	-0.288788	Intact
ENSG00000187764	6.54005	5.43e-10	2.09e-08	0.818779	-0.288454	Intact
ENSG00000113211	7.06641	0.0034816	0.0127147	0.818793	-0.288429	Intact
ENSG00000180787	7.27825	5.8e-14	8.29e-12	0.818995	-0.288073	Intact
ENSG00000171130	8.9233	1.97e-07	3.26e-06	0.819013	-0.288041	Intact
ENSG00000161835	5.98925	9.54e-05	0.000635871	0.819048	-0.28798	Intact
ENSG00000168447	5.6529	1.58e-05	0.000139377	0.819279	-0.287572	Intact
ENSG00000199895	4.50277	1.4e-05	0.000125957	0.81953	-0.287131	Intact
ENSG00000101871	9.68754	0.0118517	0.0345895	0.81958	-0.287042	Intact
ENSG00000171703	9.79438	4.63e-09	1.3e-07	0.819608	-0.286994	Intact
ENSG00000108370	5.75244	0.0111389	0.0330179	0.819839	-0.286587	Intact
ENSG00000134369	8.50837	2.99e-06	3.35e-05	0.819919	-0.286447	Intact
ENSG00000206999	4.09931	0.00623491	0.020492	0.819951	-0.28639	Intact
ENSG00000185046	9.39493	0.00626205	0.0205651	0.81996	-0.286375	Intact
ENSG00000077264	8.13087	0.00643773	0.0210762	0.820022	-0.286265	Intact
ENSG00000124302	7.1227	3.55e-05	0.000277541	0.820123	-0.286088	Intact
ENSG00000107186	8.97185	1.06e-08	2.63e-07	0.820141	-0.286056	Intact
ENSG00000141012	7.24709	4.6e-12	3.33e-10	0.820406	-0.28559	Intact
ENSG00000171680	7.32977	1.78e-06	2.15e-05	0.820526	-0.285379	Intact
ENSG00000140563	4.00989	0.00122191	0.00532634	0.820625	-0.285205	Intact
ENSG00000137821	9.12397	3.79e-09	1.1e-07	0.820796	-0.284905	Intact
ENSG00000179241	9.16624	1.3e-05	0.000118299	0.820878	-0.284761	Intact
ENSG00000136110	4.75912	0.0009673	0.00439428	0.821081	-0.284404	Intact
ENSG00000176809	7.77519	5.32e-05	0.00039085	0.821092	-0.284385	Intact
ENSG00000166669	5.74732	0.00292559	0.0110191	0.821137	-0.284305	Intact
ENSG00000162591	6.84781	1.88e-08	4.25e-07	0.821233	-0.284137	Intact
ENSG00000155961	6.97376	2.86e-08	6.17e-07	0.821248	-0.284111	Intact
ENSG00000255622	7.41597	0.00240768	0.00935894	0.8215	-0.283668	Intact
ENSG00000067606	6.33186	0.000554137	0.00276385	0.821599	-0.283494	Intact
ENSG00000187957	7.73762	0.0047098	0.0163025	0.821747	-0.283233	Intact
ENSG00000156920	3.85938	0.000315233	0.00172653	0.821916	-0.282938	Intact
ENSG00000184347	6.49216	0.012313	0.0356537	0.822008	-0.282776	Intact
ENSG00000188013	7.24079	4.39e-05	0.000332219	0.822177	-0.28248	Intact
ENSG00000188211	6.28869	0.00490766	0.0168514	0.82283	-0.281334	Intact
ENSG00000164037	5.59162	3.97e-06	4.27e-05	0.822843	-0.28131	Intact
ENSG00000204116	7.02116	5.49e-12	3.87e-10	0.82311	-0.280843	Intact
ENSG00000016082	4.01982	0.000290585	0.00160912	0.82314	-0.28079	Intact
ENSG00000010818	8.3077	0.000657521	0.00319021	0.823156	-0.280763	Intact
ENSG00000162836	6.86555	1.87e-07	3.11e-06	0.823173	-0.280732	Intact
ENSG00000163082	5.60686	0.00704142	0.0226749	0.823207	-0.280672	Intact
ENSG00000100379	7.07616	2.94e-08	6.34e-07	0.82324	-0.280614	Intact
ENSG00000144935	8.77566	1e-08	2.51e-07	0.823534	-0.280099	Intact
ENSG00000127252	6.83999	0.00103751	0.00465472	0.824013	-0.27926	Intact
ENSG00000167716	6.50353	1.01e-12	9.35e-11	0.824126	-0.279063	Intact
ENSG00000152582	5.75847	0.000338802	0.00183191	0.824172	-0.278983	Intact
ENSG00000179796	5.58843	5.06e-05	0.000375537	0.824278	-0.278797	Intact
ENSG00000162105	5.66867	1.17e-06	1.49e-05	0.824495	-0.278418	Intact
ENSG00000180881	6.82068	1.98e-05	0.000168535	0.824769	-0.277938	Intact
ENSG00000109586	7.26117	0.00227394	0.0089243	0.824843	-0.277809	Intact
ENSG00000101445	6.51689	0.000114606	0.000742403	0.824862	-0.277775	Intact
ENSG00000089050	7.47114	5.08e-09	1.4e-07	0.824889	-0.277729	Intact
ENSG00000146648	6.77492	0.00868316	0.0269226	0.825053	-0.277442	Intact
ENSG00000150627	8.58322	4.56e-08	9.2e-07	0.825139	-0.27729	Intact
ENSG00000115423	5.95372	2.13e-06	2.51e-05	0.825195	-0.277193	Intact
ENSG00000230438	5.85503	0.000782884	0.00368988	0.825233	-0.277127	Intact
ENSG00000149639	8.88314	3.49e-09	1.03e-07	0.825264	-0.277072	Intact
ENSG00000206617	3.24504	0.000154449	0.000953261	0.8253	-0.277009	Intact
ENSG00000160293	7.26013	4.07e-07	6.06e-06	0.825361	-0.276903	Intact
ENSG00000109738	7.3616	0.000179692	0.00108206	0.825415	-0.276808	Intact
ENSG00000110092	7.06685	0.00137382	0.00588364	0.825473	-0.276707	Intact
ENSG00000166401	6.54415	1.41e-09	4.8e-08	0.825508	-0.276646	Intact
ENSG00000171243	4.10627	0.0109976	0.0326727	0.82553	-0.276607	Intact
ENSG00000196503	5.38811	1.08e-06	1.39e-05	0.825722	-0.276271	Intact
ENSG00000145147	7.90745	0.0148632	0.0415264	0.825772	-0.276185	Intact
ENSG00000177054	7.8121	0.00362743	0.013149	0.826064	-0.275675	Intact
ENSG00000115226	7.53069	7.96e-08	1.49e-06	0.826248	-0.275354	Intact
ENSG00000116031	6.29791	0.000179631	0.00108201	0.826304	-0.275255	Intact
ENSG00000173947	4.5706	0.000259191	0.00146355	0.826359	-0.275159	Intact
ENSG00000188681	7.80036	0.0113991	0.0335716	0.826399	-0.275089	Intact
ENSG00000124104	6.47607	8.51e-13	8.36e-11	0.826563	-0.274803	Intact
ENSG00000146090	7.46395	0.00149013	0.00629426	0.826569	-0.274793	Intact
ENSG00000127249	5.81495	4.44e-06	4.69e-05	0.826652	-0.274649	Intact
ENSG00000173548	6.78856	2.98e-08	6.38e-07	0.826671	-0.274614	Intact
ENSG00000011105	8.12177	0.00270498	0.0103044	0.826821	-0.274353	Intact
ENSG00000129596	8.3679	1.16e-05	0.000106875	0.826859	-0.274288	Intact
ENSG00000120690	7.02206	1.55e-05	0.000136996	0.826871	-0.274267	Intact
ENSG00000008441	9.65719	0.000230808	0.00132934	0.826905	-0.274206	Intact
ENSG00000163840	5.49159	0.000504007	0.00254762	0.826907	-0.274202	Intact
ENSG00000179431	6.63694	0.000418153	0.00218403	0.826926	-0.274171	Intact
ENSG00000141404	6.89147	0.00701533	0.0226082	0.827017	-0.27401	Intact
ENSG00000161544	6.86673	1.14e-05	0.000105472	0.827073	-0.273914	Intact
ENSG00000101349	6.18502	0.00103966	0.00466038	0.827206	-0.273681	Intact
ENSG00000104044	5.8399	0.0155106	0.0430684	0.827367	-0.273401	Intact
ENSG00000115318	6.29282	5.87e-05	0.000424016	0.827449	-0.273258	Intact
ENSG00000133627	8.77959	5.84e-06	5.93e-05	0.827626	-0.272948	Intact
ENSG00000172638	7.39715	0.000705655	0.00339031	0.827781	-0.272678	Intact
ENSG00000196628	10.7749	4.06e-07	6.06e-06	0.827819	-0.272613	Intact
ENSG00000196440	7.20677	6.94e-07	9.51e-06	0.827858	-0.272544	Intact
ENSG00000116678	6.89187	0.000142379	0.000894781	0.827963	-0.272361	Intact
ENSG00000138380	7.45566	2.23e-11	1.32e-09	0.828042	-0.272225	Intact
ENSG00000135469	8.49192	3.59e-12	2.72e-10	0.828099	-0.272125	Intact
ENSG00000220785	6.27244	2.82e-12	2.23e-10	0.828277	-0.271815	Intact
ENSG00000135926	8.31244	0.000983443	0.00445398	0.828324	-0.271734	Intact
ENSG00000180263	8.01759	8.7e-06	8.34e-05	0.828346	-0.271695	Intact
ENSG00000160190	6.11352	0.000995327	0.0044998	0.82853	-0.271374	Intact
ENSG00000100077	8.63849	0.00155059	0.00650424	0.828586	-0.271276	Intact
ENSG00000109265	8.10546	6.5e-09	1.73e-07	0.828633	-0.271195	Intact
ENSG00000152465	7.61419	1.46e-06	1.81e-05	0.828699	-0.271081	Intact
ENSG00000049249	4.71257	0.011612	0.034041	0.828737	-0.271014	Intact
ENSG00000004468	6.33523	4.8e-05	0.000357881	0.829014	-0.270532	Intact
ENSG00000137693	7.32016	0.00430788	0.0151482	0.829047	-0.270474	Intact
ENSG00000138821	7.41635	3.56e-05	0.000278587	0.829346	-0.269954	Intact
ENSG00000138639	6.6963	0.00358743	0.0130243	0.829538	-0.26962	Intact
ENSG00000225774	3.97585	9.53e-11	4.7e-09	0.829646	-0.269432	Intact
ENSG00000167515	7.3344	1.66e-14	2.82e-12	0.829677	-0.269378	Intact
ENSG00000169174	5.66979	7.23e-06	7.13e-05	0.829885	-0.269016	Intact
ENSG00000198832	7.71566	2.62e-06	3e-05	0.829916	-0.268963	Intact
ENSG00000129197	9.00537	7.68e-11	3.9e-09	0.829918	-0.26896	Intact
ENSG00000169554	10.2297	4.57e-05	0.000343914	0.829941	-0.268919	Intact
ENSG00000184194	6.73669	5.3e-06	5.47e-05	0.830124	-0.268601	Intact
ENSG00000150961	7.40351	0.000104429	0.000686017	0.830158	-0.268542	Intact
ENSG00000196975	6.68632	0.00103483	0.00464372	0.830383	-0.268152	Intact
ENSG00000163485	6.56627	6.81e-09	1.79e-07	0.830424	-0.26808	Intact
ENSG00000143590	7.33404	0.000331362	0.00179863	0.830456	-0.268024	Intact
ENSG00000168490	6.15817	0.00118351	0.00518474	0.83054	-0.267879	Intact
ENSG00000132122	7.88958	3.24e-05	0.000257419	0.830589	-0.267793	Intact
ENSG00000157927	6.79896	2.03e-05	0.000171597	0.830687	-0.267623	Intact
ENSG00000196187	6.90824	0.000521212	0.00261951	0.831055	-0.266984	Intact
ENSG00000006756	7.27048	2.88e-12	2.26e-10	0.83107	-0.266958	Intact
ENSG00000167315	9.03832	7.75e-05	0.000533541	0.83124	-0.266663	Intact
ENSG00000166579	8.30556	7.95e-16	2.12e-13	0.831256	-0.266636	Intact
ENSG00000185513	6.58108	1.28e-05	0.000116894	0.831278	-0.266597	Intact
ENSG00000147535	8.69537	2.63e-08	5.73e-07	0.831281	-0.266592	Intact
ENSG00000147100	8.23531	1.1e-05	0.000102605	0.831592	-0.266052	Intact
ENSG00000244509	6.05387	0.000293535	0.00162262	0.83179	-0.265708	Intact
ENSG00000146005	7.09062	0.000482282	0.00245598	0.831827	-0.265644	Intact
ENSG00000101282	5.34033	4.46e-07	6.54e-06	0.832093	-0.265183	Intact
ENSG00000073331	5.35057	6.09e-06	6.14e-05	0.832096	-0.265178	Intact
ENSG00000174080	7.68704	2.61e-10	1.13e-08	0.832308	-0.26481	Intact
ENSG00000100271	8.60917	8.14e-10	2.96e-08	0.832383	-0.264681	Intact
ENSG00000071051	9.67571	3.19e-09	9.52e-08	0.83261	-0.264287	Intact
ENSG00000221968	6.9948	2.78e-06	3.15e-05	0.832745	-0.264053	Intact
ENSG00000103485	6.06597	0.000148786	0.000926739	0.832759	-0.264029	Intact
ENSG00000157483	7.01046	0.000540479	0.002706	0.832796	-0.263965	Intact
ENSG00000146216	5.87281	2.85e-05	0.000230635	0.832802	-0.263955	Intact
ENSG00000155265	6.31647	0.00011508	0.000745041	0.832843	-0.263883	Intact
ENSG00000138378	5.75151	0.00277719	0.0105467	0.832923	-0.263746	Intact
ENSG00000170310	6.72472	3.48e-06	3.82e-05	0.832923	-0.263745	Intact
ENSG00000153404	6.03376	0.000404583	0.00212955	0.832927	-0.263739	Intact
ENSG00000183317	5.84531	1.52e-06	1.87e-05	0.832996	-0.263618	Intact
ENSG00000095303	5.70437	0.000197159	0.00116719	0.833092	-0.263453	Intact
ENSG00000108474	7.4452	4.09e-09	1.17e-07	0.833104	-0.263432	Intact
ENSG00000099957	5.10828	3.13e-07	4.88e-06	0.833129	-0.263389	Intact
ENSG00000078269	6.63744	0.018323	0.049065	0.833169	-0.263318	Intact
ENSG00000108953	11.0374	2.77e-13	3.3e-11	0.833252	-0.263176	Intact
ENSG00000108556	6.08648	6.43e-05	0.000458861	0.833282	-0.263123	Intact
ENSG00000185010	5.84033	6.44e-11	3.35e-09	0.833331	-0.263038	Intact
ENSG00000229230	8.62331	0.000169642	0.00103219	0.833348	-0.263009	Intact
ENSG00000135749	7.08595	0.000574694	0.00285016	0.83336	-0.262989	Intact
ENSG00000005882	8.54206	4.85e-08	9.71e-07	0.83338	-0.262953	Intact
ENSG00000090857	8.82134	2.63e-07	4.17e-06	0.833536	-0.262683	Intact
ENSG00000124496	6.54991	0.00104872	0.00469302	0.833537	-0.262683	Intact
ENSG00000119865	8.7071	6.76e-09	1.78e-07	0.833597	-0.262578	Intact
ENSG00000165813	7.58781	2.87e-06	3.23e-05	0.833819	-0.262193	Intact
ENSG00000196177	7.27515	1.61e-07	2.73e-06	0.833839	-0.262159	Intact
ENSG00000080503	8.25203	3.5e-05	0.000274534	0.83398	-0.261915	Intact
ENSG00000169857	7.20672	6.76e-10	2.53e-08	0.834056	-0.261784	Intact
ENSG00000205045	4.48562	8.33e-09	2.13e-07	0.834063	-0.261772	Intact
ENSG00000196776	9.63562	1.41e-05	0.00012656	0.834252	-0.261444	Intact
ENSG00000101265	8.17286	0.00232115	0.00906897	0.834405	-0.261181	Intact
ENSG00000044115	8.71455	5.59e-05	0.000407696	0.834434	-0.26113	Intact
ENSG00000145088	7.9214	5.18e-05	0.000382595	0.834493	-0.261028	Intact
ENSG00000161267	6.20735	0.000395346	0.0020872	0.834504	-0.261009	Intact
ENSG00000129993	7.20993	1.81e-05	0.000156011	0.83476	-0.260567	Intact
ENSG00000140279	4.72362	1.07e-07	1.92e-06	0.834764	-0.26056	Intact
ENSG00000175164	6.47259	6.12e-06	6.16e-05	0.834923	-0.260286	Intact
ENSG00000116117	5.74556	0.000140014	0.000881239	0.834949	-0.26024	Intact
ENSG00000138801	8.43647	0.000575867	0.0028553	0.83506	-0.260048	Intact
ENSG00000166128	8.49258	1.74e-07	2.91e-06	0.835077	-0.260018	Intact
ENSG00000128578	6.895	0.0149576	0.041748	0.835091	-0.259995	Intact
ENSG00000164989	7.47363	5.19e-08	1.03e-06	0.835245	-0.259729	Intact
ENSG00000239122	6.50741	3.76e-07	5.69e-06	0.835371	-0.259511	Intact
ENSG00000134201	5.64674	0.0113156	0.0334098	0.835387	-0.259483	Intact
ENSG00000127415	7.84108	4.07e-07	6.06e-06	0.83559	-0.259134	Intact
ENSG00000126583	4.99409	0.000449013	0.00231645	0.835848	-0.258687	Intact
ENSG00000156253	8.35679	8.37e-08	1.56e-06	0.835897	-0.258603	Intact
ENSG00000107331	8.25477	1.08e-05	0.000100442	0.836033	-0.258368	Intact
ENSG00000189337	6.02979	0.000203727	0.00119731	0.836169	-0.258134	Intact
ENSG00000170743	5.4158	0.000316154	0.00172902	0.836461	-0.25763	Intact
ENSG00000175785	5.89308	0.00162246	0.00676254	0.836546	-0.257483	Intact
ENSG00000196167	5.50966	2.24e-05	0.000187538	0.836582	-0.257421	Intact
ENSG00000147459	5.49054	0.00275212	0.0104745	0.836588	-0.257411	Intact
ENSG00000172733	6.41304	5.65e-06	5.77e-05	0.836608	-0.257376	Intact
ENSG00000119950	8.04729	2.45e-09	7.68e-08	0.836699	-0.257219	Intact
ENSG00000196502	4.49748	1.81e-08	4.13e-07	0.836704	-0.257211	Intact
ENSG00000123384	9.37756	5.84e-06	5.92e-05	0.836861	-0.25694	Intact
ENSG00000149212	9.09894	0.000232109	0.00133537	0.836894	-0.256883	Intact
ENSG00000196576	9.42459	3.36e-08	7.07e-07	0.836975	-0.256743	Intact
ENSG00000163545	6.19997	0.00010604	0.000694858	0.837106	-0.256517	Intact
ENSG00000160207	6.18996	4.33e-07	6.39e-06	0.837179	-0.256392	Intact
ENSG00000104998	4.60622	6.51e-15	1.24e-12	0.837237	-0.256292	Intact
ENSG00000188828	5.28594	0.00261897	0.0100276	0.83729	-0.256201	Intact
ENSG00000109501	7.13847	3.61e-07	5.51e-06	0.837308	-0.25617	Intact
ENSG00000207384	4.00784	1.81e-05	0.000156407	0.837309	-0.256168	Intact
ENSG00000151640	9.23055	0.00214686	0.0085147	0.83733	-0.256132	Intact
ENSG00000268089	5.62382	0.000828069	0.00385549	0.83773	-0.255443	Intact
ENSG00000170903	7.30802	0.00336004	0.0123588	0.837762	-0.255387	Intact
ENSG00000116299	6.26757	0.011732	0.0343034	0.837888	-0.25517	Intact
ENSG00000133026	9.29574	5.5e-08	1.08e-06	0.837909	-0.255135	Intact
ENSG00000168004	5.95494	1.73e-05	0.000150886	0.838003	-0.254973	Intact
ENSG00000104325	8.09204	3.2e-06	3.55e-05	0.838044	-0.254902	Intact
ENSG00000156172	7.50774	4.59e-05	0.000344609	0.838077	-0.254845	Intact
ENSG00000189060	10.2311	1.08e-05	0.000100388	0.838097	-0.254811	Intact
ENSG00000179604	7.03998	4.71e-06	4.94e-05	0.838133	-0.254748	Intact
ENSG00000251952	3.16	8.64e-10	3.12e-08	0.838212	-0.254613	Intact
ENSG00000178852	5.93577	0.00154785	0.00649663	0.838372	-0.254338	Intact
ENSG00000126218	6.00288	0.000385009	0.00204392	0.838447	-0.254209	Intact
ENSG00000128274	5.62026	0.00357087	0.0129776	0.838582	-0.253976	Intact
ENSG00000134594	6.9513	0.00434508	0.0152484	0.838649	-0.253861	Intact
ENSG00000141505	5.46294	8.78e-13	8.59e-11	0.83874	-0.253704	Intact
ENSG00000012171	6.014	2.7e-06	3.08e-05	0.838754	-0.253681	Intact
ENSG00000163817	5.05085	0.000365545	0.0019554	0.8388	-0.253601	Intact
ENSG00000137463	5.14195	0.00090347	0.00414898	0.838933	-0.253372	Intact
ENSG00000105520	7.696	7.16e-05	0.000501196	0.839032	-0.253203	Intact
ENSG00000197283	7.56912	2.81e-05	0.000227665	0.839095	-0.253095	Intact
ENSG00000168701	8.03709	5.42e-09	1.47e-07	0.839164	-0.252976	Intact
ENSG00000116574	8.84364	0.00124328	0.00540271	0.839254	-0.25282	Intact
ENSG00000155016	5.93751	7.13e-07	9.75e-06	0.839279	-0.252777	Intact
ENSG00000232871	5.74774	0.00141491	0.00602769	0.839402	-0.252566	Intact
ENSG00000199224	3.2803	0.00234939	0.00916059	0.839587	-0.252248	Intact
ENSG00000183690	4.52376	5.27e-05	0.000388133	0.839603	-0.252221	Intact
ENSG00000111087	5.57566	0.00560752	0.0187583	0.839665	-0.252115	Intact
ENSG00000168575	7.75321	1.81e-05	0.00015588	0.83984	-0.251814	Intact
ENSG00000185650	7.94599	0.00100326	0.00452443	0.839875	-0.251753	Intact
ENSG00000107281	7.77042	2.35e-07	3.79e-06	0.839891	-0.251726	Intact
ENSG00000225855	6.14603	2.45e-09	7.67e-08	0.83994	-0.251642	Intact
ENSG00000128714	5.55035	0.000329502	0.00179046	0.839944	-0.251635	Intact
ENSG00000185155	6.18419	2.23e-07	3.62e-06	0.840114	-0.251342	Intact
ENSG00000240694	6.86894	6.94e-06	6.87e-05	0.840223	-0.251156	Intact
ENSG00000021300	7.61759	0.016543	0.0452891	0.840371	-0.250902	Intact
ENSG00000184384	8.97163	0.00546078	0.0183609	0.84043	-0.250801	Intact
ENSG00000106868	8.57778	0.00197433	0.00793659	0.840666	-0.250396	Intact
ENSG00000168765	7.4702	0.000244764	0.00139407	0.840799	-0.250167	Intact
ENSG00000166963	7.07291	0.00010576	0.00069324	0.840806	-0.250154	Intact
ENSG00000091592	5.86237	1.04e-09	3.69e-08	0.840994	-0.249832	Intact
ENSG00000070366	7.7836	7.33e-12	4.97e-10	0.841121	-0.249615	Intact
ENSG00000182389	7.14604	0.0057655	0.019177	0.841217	-0.249451	Intact
ENSG00000145920	6.22394	9.59e-06	9.08e-05	0.841261	-0.249374	Intact
ENSG00000111058	5.84569	0.0115534	0.033922	0.841439	-0.24907	Intact
ENSG00000108528	8.82132	1.18e-09	4.11e-08	0.841446	-0.249057	Intact
ENSG00000159720	10.1452	3.78e-08	7.77e-07	0.841505	-0.248956	Intact
ENSG00000124224	5.50045	0.000200574	0.00118175	0.841541	-0.248895	Intact
ENSG00000174125	4.4153	5.02e-06	5.23e-05	0.841812	-0.24843	Intact
ENSG00000182796	7.83522	1.88e-09	6.16e-08	0.841885	-0.248305	Intact
ENSG00000205364	6.74102	0.00124826	0.00542101	0.841898	-0.248283	Intact
ENSG00000064961	8.44216	8.76e-05	0.000591367	0.842017	-0.248079	Intact
ENSG00000162367	5.42433	0.0101897	0.0306843	0.842136	-0.247875	Intact
ENSG00000247746	6.48998	1.14e-12	1.04e-10	0.842156	-0.24784	Intact
ENSG00000013016	6.45626	1.64e-05	0.000143742	0.842181	-0.247797	Intact
ENSG00000162426	5.78624	1.19e-08	2.89e-07	0.84222	-0.247731	Intact
ENSG00000120658	7.22672	0.00624426	0.0205163	0.84228	-0.247629	Intact
ENSG00000162729	7.52093	5.09e-10	1.99e-08	0.842375	-0.247465	Intact
ENSG00000196741	6.8027	3.96e-09	1.14e-07	0.842394	-0.247433	Intact
ENSG00000167858	4.73077	1.75e-05	0.000151801	0.842446	-0.247345	Intact
ENSG00000063587	8.37617	6.43e-07	8.96e-06	0.842526	-0.247206	Intact
ENSG00000230989	8.39817	3.24e-08	6.84e-07	0.842573	-0.247127	Intact
ENSG00000188338	7.55484	0.00451901	0.015751	0.842712	-0.246889	Intact
ENSG00000118160	7.77657	0.000168961	0.00102863	0.842732	-0.246854	Intact
ENSG00000039068	5.39793	0.0145371	0.0408126	0.842785	-0.246764	Intact
ENSG00000221890	6.99922	0.00111749	0.00494363	0.842931	-0.246514	Intact
ENSG00000110031	7.48333	4.75e-12	3.42e-10	0.84297	-0.246447	Intact
ENSG00000135447	7.25509	0.000995486	0.0044998	0.842978	-0.246432	Intact
ENSG00000141504	7.7517	1.35e-06	1.7e-05	0.843273	-0.245928	Intact
ENSG00000185989	6.70329	0.000151305	0.000937983	0.843317	-0.245853	Intact
ENSG00000180264	5.88829	0.000158471	0.00097266	0.843361	-0.245777	Intact
ENSG00000183833	5.53079	0.000512405	0.00258497	0.843402	-0.245708	Intact
ENSG00000125247	8.98217	1.55e-05	0.000137151	0.843537	-0.245476	Intact
ENSG00000214402	5.2112	0.000441998	0.0022853	0.843549	-0.245456	Intact
ENSG00000185339	7.58439	7.61e-05	0.000525717	0.843654	-0.245277	Intact
ENSG00000170365	9.20685	3.59e-06	3.92e-05	0.843686	-0.245222	Intact
ENSG00000114859	7.20584	3.67e-06	4e-05	0.844194	-0.244354	Intact
ENSG00000100095	10.5974	0.000411225	0.00215353	0.844208	-0.24433	Intact
ENSG00000165868	7.03364	0.00422064	0.0148937	0.844244	-0.244268	Intact
ENSG00000138161	5.64654	3.86e-05	0.000297327	0.844323	-0.244132	Intact
ENSG00000208004	5.63294	0.000162374	0.000994579	0.844354	-0.244081	Intact
ENSG00000170581	8.43257	6.17e-08	1.18e-06	0.844552	-0.243741	Intact
ENSG00000113916	7.82673	0.00508869	0.0173794	0.844634	-0.243601	Intact
ENSG00000115468	8.20822	0.00143795	0.00610142	0.844759	-0.243388	Intact
ENSG00000185436	4.55393	7.47e-06	7.34e-05	0.84483	-0.243267	Intact
ENSG00000186376	6.6128	3.22e-08	6.79e-07	0.844955	-0.243054	Intact
ENSG00000107147	5.48385	0.00191081	0.00773149	0.845094	-0.242817	Intact
ENSG00000163686	8.02888	0.000444641	0.00229728	0.845245	-0.242559	Intact
ENSG00000138496	5.47718	0.00145476	0.00615629	0.845515	-0.242097	Intact
ENSG00000106034	5.16494	0.00315583	0.011739	0.845534	-0.242066	Intact
ENSG00000140519	4.75127	1.96e-09	6.34e-08	0.845647	-0.241872	Intact
ENSG00000006695	7.82811	3.97e-11	2.18e-09	0.84573	-0.241731	Intact
ENSG00000053747	5.43955	0.000296516	0.00163566	0.846119	-0.241068	Intact
ENSG00000205808	6.20938	3.37e-08	7.07e-07	0.846173	-0.240975	Intact
ENSG00000063180	7.68779	0.00139438	0.00595594	0.84619	-0.240947	Intact
ENSG00000006740	6.51757	3.86e-05	0.000297233	0.846274	-0.240804	Intact
ENSG00000196876	8.1419	1.09e-11	7.08e-10	0.846317	-0.24073	Intact
ENSG00000163576	4.68555	5.17e-05	0.000382077	0.846341	-0.240688	Intact
ENSG00000111331	6.43808	0.001697	0.00701621	0.846431	-0.240535	Intact
ENSG00000168528	7.32517	0.00332806	0.0122626	0.846473	-0.240464	Intact
ENSG00000111077	7.26441	8.01e-07	1.08e-05	0.84651	-0.240401	Intact
ENSG00000136250	5.76267	3.62e-05	0.000282403	0.846603	-0.240242	Intact
ENSG00000207978	3.61832	1.95e-06	2.33e-05	0.846682	-0.240109	Intact
ENSG00000205352	4.40774	0.00461334	0.0160187	0.846726	-0.240034	Intact
ENSG00000074755	8.25492	1.62e-09	5.4e-08	0.846832	-0.239852	Intact
ENSG00000068831	5.92179	0.000157477	0.000967639	0.846993	-0.239577	Intact
ENSG00000138031	7.86556	3.56e-06	3.89e-05	0.84725	-0.239141	Intact
ENSG00000110375	5.83225	1.01e-08	2.53e-07	0.847341	-0.238986	Intact
ENSG00000201113	5.15043	7.11e-08	1.35e-06	0.847373	-0.238931	Intact
ENSG00000132510	8.42166	5.26e-08	1.04e-06	0.847421	-0.238849	Intact
ENSG00000178130	5.68601	7.55e-05	0.000522358	0.847471	-0.238764	Intact
ENSG00000129968	5.98122	5.48e-06	5.62e-05	0.847484	-0.238741	Intact
ENSG00000189171	6.36608	0.000712067	0.00341545	0.847548	-0.238633	Intact
ENSG00000188191	6.65513	9.8e-05	0.000651162	0.847603	-0.23854	Intact
ENSG00000199492	5.13134	1.51e-05	0.000134235	0.847605	-0.238536	Intact
ENSG00000106080	6.82074	8.77e-06	8.39e-05	0.847618	-0.238515	Intact
ENSG00000155099	6.11514	0.00717477	0.0230092	0.847639	-0.238479	Intact
ENSG00000176974	6.72969	3.14e-08	6.66e-07	0.847647	-0.238465	Intact
ENSG00000185432	6.4556	0.000456368	0.00234863	0.84784	-0.238137	Intact
ENSG00000160111	5.57952	8.62e-05	0.000583942	0.847856	-0.238108	Intact
ENSG00000154736	5.77505	0.0176701	0.0477409	0.847896	-0.23804	Intact
ENSG00000173805	5.36344	0.00224738	0.00883661	0.848078	-0.237732	Intact
ENSG00000074964	7.22254	1.87e-09	6.13e-08	0.848089	-0.237713	Intact
ENSG00000150593	7.77592	0.000678999	0.00328003	0.848164	-0.237584	Intact
ENSG00000011523	8.33245	8.02e-09	2.06e-07	0.84821	-0.237506	Intact
ENSG00000091136	9.49785	0.00388657	0.0139388	0.848313	-0.237332	Intact
ENSG00000178075	5.56168	0.0058784	0.019497	0.848488	-0.237033	Intact
ENSG00000142235	6.29702	8.51e-10	3.08e-08	0.848549	-0.23693	Intact
ENSG00000105419	7.18709	6.37e-05	0.000454929	0.848651	-0.236756	Intact
ENSG00000132554	6.30148	0.00362169	0.0131328	0.848847	-0.236423	Intact
ENSG00000197734	7.17036	2.89e-05	0.000233538	0.848852	-0.236415	Intact
ENSG00000164294	4.33152	0.0186336	0.0497496	0.848892	-0.236348	Intact
ENSG00000158458	6.41737	8.05e-05	0.00055187	0.84894	-0.236266	Intact
ENSG00000187678	7.25732	0.00343978	0.0125991	0.849172	-0.235871	Intact
ENSG00000148842	7.95516	2.48e-11	1.46e-09	0.849225	-0.235781	Intact
ENSG00000136098	7.19103	0.000101868	0.000671711	0.849322	-0.235617	Intact
ENSG00000227203	5.4839	0.00935769	0.0286383	0.84935	-0.235568	Intact
ENSG00000115041	6.61248	0.00174008	0.00716047	0.849562	-0.23521	Intact
ENSG00000167207	4.92579	3.53e-05	0.000276192	0.849573	-0.23519	Intact
ENSG00000131477	7.19341	2.42e-06	2.8e-05	0.849805	-0.234796	Intact
ENSG00000175309	7.56714	1.59e-10	7.36e-09	0.849956	-0.234539	Intact
ENSG00000228169	5.3444	2.96e-06	3.32e-05	0.850001	-0.234464	Intact
ENSG00000143545	7.30267	0.00239748	0.0093239	0.850026	-0.234421	Intact
ENSG00000140937	8.74588	0.00473359	0.016349	0.850096	-0.234302	Intact
ENSG00000181481	6.9819	4.92e-09	1.35e-07	0.85025	-0.234041	Intact
ENSG00000102935	9.55848	6.51e-05	0.000462885	0.850371	-0.233836	Intact
ENSG00000007168	9.72017	3.99e-10	1.62e-08	0.850505	-0.233608	Intact
ENSG00000137713	8.42962	4.16e-09	1.18e-07	0.850577	-0.233486	Intact
ENSG00000087448	7.8199	3.43e-08	7.19e-07	0.850595	-0.233456	Intact
ENSG00000103160	7.98811	5.96e-08	1.15e-06	0.850597	-0.233452	Intact
ENSG00000139597	6.45476	2e-05	0.000169772	0.850663	-0.23334	Intact
ENSG00000072415	7.01954	3.98e-07	5.95e-06	0.850788	-0.233128	Intact
ENSG00000106003	5.87549	3.8e-05	0.000293279	0.850855	-0.233015	Intact
ENSG00000138395	4.0745	4.7e-05	0.000351268	0.850907	-0.232926	Intact
ENSG00000001036	7.64741	1.22e-06	1.54e-05	0.850987	-0.232791	Intact
ENSG00000204186	7.67726	0.00554587	0.0185935	0.851063	-0.232663	Intact
ENSG00000150594	6.28514	0.00239127	0.00930316	0.851119	-0.232568	Intact
ENSG00000107560	9.35701	0.00030021	0.00165344	0.851188	-0.23245	Intact
ENSG00000227124	8.65358	0.00032544	0.00177197	0.851248	-0.232349	Intact
ENSG00000135111	6.23064	0.00676364	0.0219654	0.8513	-0.232261	Intact
ENSG00000115425	6.00486	0.000132871	0.000842329	0.851365	-0.23215	Intact
ENSG00000162627	5.36682	0.00303691	0.0113651	0.851398	-0.232095	Intact
ENSG00000121064	7.09184	0.000166558	0.00101666	0.851463	-0.231984	Intact
ENSG00000100218	4.94024	1.24e-09	4.28e-08	0.851537	-0.231858	Intact
ENSG00000177337	6.27037	0.00370128	0.0133798	0.851566	-0.23181	Intact
ENSG00000174705	8.00856	0.000125375	0.000803529	0.851569	-0.231805	Intact
ENSG00000224023	5.34735	4.19e-07	6.21e-06	0.851602	-0.231748	Intact
ENSG00000198794	9.48278	3.49e-08	7.3e-07	0.851668	-0.231637	Intact
ENSG00000100994	8.40932	3.37e-05	0.000266256	0.851684	-0.231609	Intact
ENSG00000105967	4.60832	0.0127422	0.0366543	0.851763	-0.231475	Intact
ENSG00000164938	8.95097	4.43e-06	4.69e-05	0.851934	-0.231186	Intact
ENSG00000277893	4.47721	0.00413295	0.0146334	0.852054	-0.230983	Intact
ENSG00000068024	7.25382	3.41e-07	5.26e-06	0.852078	-0.230943	Intact
ENSG00000103489	7.78978	0.000474058	0.00242071	0.852103	-0.230901	Intact
ENSG00000138303	7.62253	7.86e-11	3.97e-09	0.852106	-0.230895	Intact
ENSG00000109911	8.40923	0.00165568	0.00688057	0.852231	-0.230684	Intact
ENSG00000152104	6.97872	0.00474309	0.0163719	0.852316	-0.23054	Intact
ENSG00000135362	5.94559	0.0047165	0.0163165	0.852436	-0.230336	Intact
ENSG00000035664	6.91596	0.00774956	0.024516	0.852553	-0.230139	Intact
ENSG00000168329	5.50456	0.0068476	0.0221656	0.852595	-0.230067	Intact
ENSG00000105519	6.69531	3.84e-05	0.000296022	0.852635	-0.23	Intact
ENSG00000152217	9.66945	1.57e-06	1.93e-05	0.852765	-0.229779	Intact
ENSG00000151176	7.95154	7.97e-07	1.07e-05	0.852886	-0.229575	Intact
ENSG00000179979	7.08489	2.75e-06	3.12e-05	0.853014	-0.229358	Intact
ENSG00000130830	8.85261	0.00167548	0.00694501	0.853021	-0.229347	Intact
ENSG00000219481	10.7654	5.36e-06	5.51e-05	0.853063	-0.229276	Intact
ENSG00000222503	4.56918	1.51e-05	0.000134188	0.853262	-0.228939	Intact
ENSG00000101230	4.5613	0.000193098	0.0011454	0.853323	-0.228835	Intact
ENSG00000189420	5.53995	8.59e-08	1.59e-06	0.853444	-0.228632	Intact
ENSG00000138083	6.72487	0.0136299	0.0387572	0.853645	-0.228291	Intact
ENSG00000164849	5.9558	5.08e-07	7.34e-06	0.853665	-0.228258	Intact
ENSG00000138356	4.29455	5.17e-05	0.000382487	0.853714	-0.228175	Intact
ENSG00000171160	7.89255	9.07e-07	1.2e-05	0.853759	-0.228099	Intact
ENSG00000173157	3.95639	0.000436398	0.00226247	0.853778	-0.228067	Intact
ENSG00000015532	6.82748	1.93e-08	4.36e-07	0.853783	-0.228059	Intact
ENSG00000157350	7.8398	8.87e-09	2.26e-07	0.853839	-0.227965	Intact
ENSG00000179630	4.58719	1.14e-05	0.000105433	0.853865	-0.227919	Intact
ENSG00000204314	6.0076	6.13e-07	8.63e-06	0.853907	-0.22785	Intact
ENSG00000172348	6.9518	0.0147122	0.0412106	0.853917	-0.227832	Intact
ENSG00000180697	5.24376	0.00242899	0.00941856	0.854015	-0.227666	Intact
ENSG00000174231	10.3791	2.88e-09	8.78e-08	0.854079	-0.227558	Intact
ENSG00000164816	3.61979	0.00143966	0.00610594	0.854082	-0.227553	Intact
ENSG00000149634	6.51889	8.68e-10	3.13e-08	0.854113	-0.227502	Intact
ENSG00000167842	7.52485	1.08e-05	0.000100411	0.854329	-0.227136	Intact
ENSG00000132840	6.44977	0.00353224	0.0128594	0.854415	-0.226991	Intact
ENSG00000203797	4.34192	3.79e-06	4.11e-05	0.854416	-0.22699	Intact
ENSG00000054277	6.7996	0.000473721	0.00242031	0.854464	-0.226908	Intact
ENSG00000187893	4.92855	3.09e-08	6.57e-07	0.854482	-0.226878	Intact
ENSG00000114948	8.10532	0.0130533	0.0373703	0.854657	-0.226583	Intact
ENSG00000184939	8.38392	3.33e-09	9.86e-08	0.854687	-0.226533	Intact
ENSG00000233608	5.24387	0.00135992	0.00583362	0.854813	-0.226319	Intact
ENSG00000180176	5.30021	0.00221312	0.0087247	0.854818	-0.226311	Intact
ENSG00000151692	8.55889	0.0101933	0.0306907	0.854963	-0.226067	Intact
ENSG00000067445	7.85318	3.26e-09	9.7e-08	0.855015	-0.225979	Intact
ENSG00000141179	7.13894	8.42e-08	1.57e-06	0.855046	-0.225926	Intact
ENSG00000152778	7.09337	4.26e-05	0.000323237	0.855069	-0.225888	Intact
ENSG00000156042	5.32074	0.000278058	0.00155052	0.855089	-0.225853	Intact
ENSG00000198715	7.18294	1.08e-05	0.000100388	0.855123	-0.225797	Intact
ENSG00000176732	6.47686	1e-06	1.3e-05	0.855216	-0.225639	Intact
ENSG00000081791	8.07899	2.56e-12	2.07e-10	0.855267	-0.225553	Intact
ENSG00000175793	5.5243	3.16e-05	0.000251995	0.855274	-0.225541	Intact
ENSG00000019995	9.2914	3.69e-08	7.65e-07	0.855334	-0.22544	Intact
ENSG00000269404	3.5831	4.43e-05	0.000334237	0.855358	-0.2254	Intact
ENSG00000167840	6.48063	5.14e-05	0.000380404	0.855451	-0.225242	Intact
ENSG00000141485	5.6774	3.07e-05	0.000246089	0.855471	-0.22521	Intact
ENSG00000176720	7.43293	0.00645404	0.021123	0.855508	-0.225147	Intact
ENSG00000198838	5.97408	0.0154481	0.0429288	0.855579	-0.225027	Intact
ENSG00000204653	6.24016	0.00150593	0.00634986	0.855682	-0.224853	Intact
ENSG00000131788	7.56971	1.24e-05	0.000113905	0.855772	-0.224702	Intact
ENSG00000163069	9.98031	1.97e-07	3.26e-06	0.855905	-0.224477	Intact
ENSG00000108509	7.8235	4.33e-06	4.59e-05	0.85605	-0.224233	Intact
ENSG00000131771	6.88072	0.00800358	0.0251833	0.856103	-0.224143	Intact
ENSG00000088682	8.991	2.12e-11	1.26e-09	0.856212	-0.22396	Intact
ENSG00000175395	8.39779	1.25e-06	1.58e-05	0.856245	-0.223905	Intact
ENSG00000166173	7.39657	1.99e-05	0.000169098	0.856624	-0.223266	Intact
ENSG00000138794	5.9835	4.54e-05	0.000341809	0.856892	-0.222815	Intact
ENSG00000069849	8.74898	2.92e-05	0.00023525	0.856948	-0.22272	Intact
ENSG00000204175	5.62125	6.17e-08	1.18e-06	0.856963	-0.222695	Intact
ENSG00000106327	5.66868	2.59e-05	0.000212426	0.856963	-0.222695	Intact
ENSG00000182359	6.01743	2.75e-06	3.12e-05	0.857057	-0.222536	Intact
ENSG00000020633	5.7837	0.000570703	0.00283363	0.857151	-0.222378	Intact
ENSG00000162931	5.63225	1.96e-09	6.34e-08	0.857213	-0.222274	Intact
ENSG00000188993	5.56518	0.000537305	0.00269203	0.857298	-0.222132	Intact
ENSG00000129990	6.60804	0.000787377	0.00370734	0.857426	-0.221916	Intact
ENSG00000134352	8.82993	0.000187399	0.00111982	0.857495	-0.221799	Intact
ENSG00000107882	7.43871	4.43e-11	2.38e-09	0.857536	-0.221731	Intact
ENSG00000160145	9.59782	0.00123151	0.00535931	0.857694	-0.221465	Intact
ENSG00000233871	4.09705	1.93e-06	2.31e-05	0.857723	-0.221416	Intact
ENSG00000164430	5.84366	0.00162817	0.00678231	0.85784	-0.221219	Intact
ENSG00000176563	4.49383	2.46e-12	2.01e-10	0.857923	-0.22108	Intact
ENSG00000180481	5.56959	0.000294878	0.00162791	0.858069	-0.220835	Intact
ENSG00000160766	8.31474	1.54e-05	0.000136739	0.85818	-0.220649	Intact
ENSG00000130813	6.68231	1.35e-05	0.000122086	0.858208	-0.220601	Intact
ENSG00000102981	6.68515	1.46e-06	1.81e-05	0.858321	-0.220411	Intact
ENSG00000100842	8.16792	3.16e-06	3.51e-05	0.858525	-0.220067	Intact
ENSG00000231925	8.08812	9.44e-08	1.73e-06	0.858558	-0.220013	Intact
ENSG00000184381	7.15742	1.46e-07	2.51e-06	0.858644	-0.219868	Intact
ENSG00000089127	6.3511	0.000592789	0.00292198	0.858664	-0.219834	Intact
ENSG00000166619	9.51203	0.00238475	0.00928294	0.858833	-0.21955	Intact
ENSG00000183401	6.53196	1.06e-06	1.37e-05	0.858835	-0.219547	Intact
ENSG00000067836	8.99113	0.00570131	0.0190116	0.85901	-0.219253	Intact
ENSG00000172817	7.4186	5.49e-08	1.08e-06	0.85905	-0.219187	Intact
ENSG00000169783	5.63026	0.00176961	0.00725369	0.859068	-0.219156	Intact
ENSG00000188559	8.9815	4.55e-08	9.17e-07	0.859249	-0.218852	Intact
ENSG00000172828	5.25038	0.00987958	0.0299392	0.859254	-0.218843	Intact
ENSG00000207359	6.70713	9.98e-06	9.4e-05	0.8595	-0.218431	Intact
ENSG00000214425	8.9805	0.00695176	0.0224436	0.859521	-0.218395	Intact
ENSG00000215475	5.08883	0.00316856	0.011778	0.859734	-0.218038	Intact
ENSG00000204695	4.58594	0.00765055	0.0242612	0.859761	-0.217993	Intact
ENSG00000166840	5.1979	0.0022917	0.00897826	0.859763	-0.217989	Intact
ENSG00000197763	7.13869	8.26e-07	1.11e-05	0.859821	-0.217893	Intact
ENSG00000184719	7.5921	1.44e-05	0.0001294	0.859831	-0.217875	Intact
ENSG00000152595	3.68609	0.00193471	0.00781465	0.85992	-0.217726	Intact
ENSG00000199932	4.97585	4.73e-07	6.89e-06	0.860043	-0.217519	Intact
ENSG00000198369	9.01253	3.51e-07	5.39e-06	0.860076	-0.217464	Intact
ENSG00000179820	8.08961	0.010028	0.0303053	0.860093	-0.217436	Intact
ENSG00000197321	6.61691	0.017809	0.0479927	0.860169	-0.217308	Intact
ENSG00000135272	6.66412	0.00511165	0.0174408	0.860206	-0.217246	Intact
ENSG00000114251	5.12489	0.00947569	0.028932	0.860395	-0.216929	Intact
ENSG00000091844	6.65883	0.000253565	0.0014368	0.860419	-0.216888	Intact
ENSG00000214013	8.08639	1.62e-10	7.45e-09	0.86062	-0.216551	Intact
ENSG00000184809	4.70482	4.45e-07	6.54e-06	0.860689	-0.216436	Intact
ENSG00000212628	3.04674	0.000771375	0.00364587	0.860757	-0.216322	Intact
ENSG00000175879	5.21586	0.00513895	0.0175084	0.860759	-0.216319	Intact
ENSG00000159899	8.48038	2.02e-07	3.32e-06	0.86081	-0.216232	Intact
ENSG00000170340	5.18391	0.000129914	0.000826041	0.861028	-0.215868	Intact
ENSG00000181019	6.06615	0.000468482	0.00240099	0.861033	-0.21586	Intact
ENSG00000004660	7.26682	0.00462845	0.0160632	0.861089	-0.215765	Intact
ENSG00000177994	4.2909	6.71e-09	1.78e-07	0.861122	-0.21571	Intact
ENSG00000226525	2.9401	1.39e-05	0.000124731	0.861134	-0.21569	Intact
ENSG00000163577	6.0476	0.00433006	0.0152084	0.861171	-0.215628	Intact
ENSG00000234465	6.95094	5.43e-06	5.57e-05	0.861187	-0.215601	Intact
ENSG00000131089	10.2376	7.42e-09	1.93e-07	0.86125	-0.215496	Intact
ENSG00000089177	7.14111	0.000390303	0.00206681	0.86127	-0.215462	Intact
ENSG00000229590	5.13692	1.52e-06	1.87e-05	0.861522	-0.215041	Intact
ENSG00000125895	5.03702	2.33e-05	0.000194127	0.861557	-0.214983	Intact
ENSG00000121753	7.91809	0.00302417	0.0113222	0.861559	-0.214978	Intact
ENSG00000167173	6.59752	0.000105051	0.000689671	0.861584	-0.214936	Intact
ENSG00000039139	4.92198	0.00100043	0.00451481	0.861686	-0.214766	Intact
ENSG00000142173	7.24356	5.49e-05	0.000401231	0.861708	-0.214729	Intact
ENSG00000101298	6.05729	1.53e-06	1.89e-05	0.861731	-0.214691	Intact
ENSG00000076258	5.13034	0.000964998	0.00438651	0.861792	-0.214589	Intact
ENSG00000197748	5.93616	0.00295336	0.0111018	0.861817	-0.214547	Intact
ENSG00000163430	8.43083	0.00728173	0.0233024	0.861927	-0.214363	Intact
ENSG00000076067	8.74809	4.18e-05	0.000317997	0.862024	-0.214201	Intact
ENSG00000181631	5.21831	0.00141436	0.00602658	0.862028	-0.214193	Intact
ENSG00000228056	6.91176	0.000103985	0.000683737	0.862068	-0.214126	Intact
ENSG00000182700	6.11884	8.58e-06	8.24e-05	0.862201	-0.213905	Intact
ENSG00000124194	7.86563	6.11e-05	0.000439046	0.862252	-0.213818	Intact
ENSG00000164591	6.28852	0.00226637	0.00889958	0.862327	-0.213693	Intact
ENSG00000071242	6.88915	0.000222408	0.00128908	0.862487	-0.213426	Intact
ENSG00000186231	5.56172	0.0150354	0.0419371	0.862638	-0.213172	Intact
ENSG00000068383	7.96263	2.4e-05	0.000199086	0.86267	-0.213119	Intact
ENSG00000109929	9.23856	2.72e-06	3.09e-05	0.862892	-0.212747	Intact
ENSG00000205209	6.60358	0.0010054	0.00453282	0.862904	-0.212729	Intact
ENSG00000108515	5.55665	6.65e-05	0.000471451	0.862931	-0.212682	Intact
ENSG00000137936	5.99726	7.32e-05	0.000509582	0.862938	-0.212671	Intact
ENSG00000184979	5.90901	0.00133305	0.00573589	0.862957	-0.212639	Intact
ENSG00000140287	4.33177	1.19e-05	0.00010945	0.862958	-0.212637	Intact
ENSG00000141499	6.63927	9.27e-09	2.35e-07	0.862959	-0.212635	Intact
ENSG00000136274	7.16435	1.7e-07	2.86e-06	0.8631	-0.212401	Intact
ENSG00000120008	8.44658	1.18e-09	4.11e-08	0.863129	-0.212352	Intact
ENSG00000196668	6.14157	0.00328358	0.0121284	0.863137	-0.212338	Intact
ENSG00000005469	7.40178	0.00124282	0.00540181	0.863272	-0.212113	Intact
ENSG00000120664	4.60538	0.000116268	0.000751809	0.863305	-0.212058	Intact
ENSG00000137098	5.34596	1.08e-06	1.38e-05	0.86338	-0.211933	Intact
ENSG00000101049	4.97878	0.000284715	0.00158135	0.863439	-0.211834	Intact
ENSG00000012822	9.28783	4.58e-10	1.82e-08	0.863618	-0.211535	Intact
ENSG00000239547	4.14931	0.00259147	0.0099386	0.863671	-0.211447	Intact
ENSG00000166272	7.43133	8.75e-11	4.35e-09	0.863768	-0.211283	Intact
ENSG00000125820	4.65537	0.00948931	0.0289652	0.863774	-0.211275	Intact
ENSG00000159403	6.55541	0.00315707	0.0117416	0.863781	-0.211263	Intact
ENSG00000139508	5.47763	0.00706653	0.0227399	0.863813	-0.211209	Intact
ENSG00000105699	6.09713	3.41e-05	0.000268731	0.863831	-0.211179	Intact
ENSG00000054690	7.83154	0.00322633	0.011959	0.863861	-0.21113	Intact
ENSG00000077150	5.62884	0.000347348	0.00187091	0.863868	-0.211117	Intact
ENSG00000175352	6.52105	0.00882756	0.0272659	0.863881	-0.211096	Intact
ENSG00000183579	8.18704	0.0102007	0.0307047	0.863915	-0.211038	Intact
ENSG00000163702	6.20602	7.47e-05	0.000518079	0.86409	-0.210746	Intact
ENSG00000105855	8.84422	0.0128011	0.0367834	0.864106	-0.210721	Intact
ENSG00000144560	7.56911	2.82e-09	8.63e-08	0.864117	-0.210702	Intact
ENSG00000239521	9.66413	3.72e-05	0.000289205	0.864154	-0.210639	Intact
ENSG00000127804	6.95215	1.07e-09	3.77e-08	0.864246	-0.210487	Intact
ENSG00000153790	6.96362	0.00107909	0.00480439	0.864309	-0.21038	Intact
ENSG00000226887	4.1717	7.69e-05	0.000530346	0.86458	-0.209928	Intact
ENSG00000099139	6.74446	0.0131704	0.0376493	0.865113	-0.20904	Intact
ENSG00000107679	8.50194	4.75e-09	1.32e-07	0.865352	-0.208642	Intact
ENSG00000198934	6.53856	5.98e-05	0.000431178	0.865385	-0.208587	Intact
ENSG00000251608	4.00709	0.0133807	0.0381573	0.865542	-0.208325	Intact
ENSG00000173531	5.73845	8.31e-05	0.000566272	0.86559	-0.208245	Intact
ENSG00000166268	4.73037	0.00168003	0.00696017	0.865849	-0.207813	Intact
ENSG00000112977	9.71536	5.3e-06	5.47e-05	0.865897	-0.207732	Intact
ENSG00000140323	8.75599	0.000177461	0.00107047	0.866027	-0.207517	Intact
ENSG00000132383	7.55617	1.1e-08	2.71e-07	0.866088	-0.207414	Intact
ENSG00000108559	9.69066	4.12e-08	8.42e-07	0.86617	-0.207277	Intact
ENSG00000202377	4.48189	0.00308969	0.0115297	0.866393	-0.206907	Intact
ENSG00000121933	6.14644	0.0114707	0.0337305	0.866521	-0.206694	Intact
ENSG00000060642	7.05567	4.67e-11	2.49e-09	0.866618	-0.206532	Intact
ENSG00000168671	5.08316	1.16e-07	2.07e-06	0.866636	-0.206502	Intact
ENSG00000205771	5.38224	1.66e-06	2.02e-05	0.866638	-0.206498	Intact
ENSG00000169410	7.70173	2.4e-08	5.29e-07	0.866668	-0.206449	Intact
ENSG00000184613	9.6641	0.00400308	0.0142793	0.866677	-0.206434	Intact
ENSG00000118849	5.01446	1.56e-05	0.000137794	0.866841	-0.206162	Intact
ENSG00000249992	7.41976	0.000941501	0.00429828	0.866888	-0.206083	Intact
ENSG00000186350	7.24146	0.00735147	0.0234863	0.866924	-0.206023	Intact
ENSG00000136807	9.71008	7.64e-08	1.44e-06	0.866951	-0.205978	Intact
ENSG00000070214	7.86634	4.09e-06	4.38e-05	0.867057	-0.205802	Intact
ENSG00000146021	6.71731	0.00783213	0.0247281	0.867073	-0.205775	Intact
ENSG00000150510	7.57931	0.00548959	0.0184401	0.867144	-0.205657	Intact
ENSG00000186897	4.66827	1.69e-08	3.93e-07	0.867193	-0.205575	Intact
ENSG00000149488	4.76773	0.000579661	0.0028687	0.86723	-0.205513	Intact
ENSG00000168993	7.37409	0.0149081	0.0416429	0.86726	-0.205464	Intact
ENSG00000109323	5.95322	1.99e-05	0.000168893	0.867464	-0.205125	Intact
ENSG00000109790	7.19559	0.00220463	0.00869775	0.867627	-0.204853	Intact
ENSG00000116990	6.30416	0.0119288	0.0347614	0.867677	-0.204769	Intact
ENSG00000102886	7.47605	0.000862597	0.00398215	0.867765	-0.204623	Intact
ENSG00000198919	8.54956	2.61e-06	3e-05	0.867797	-0.204571	Intact
ENSG00000201356	4.28972	3.74e-08	7.71e-07	0.867798	-0.204569	Intact
ENSG00000104723	9.6943	9.15e-05	0.000612861	0.867802	-0.204563	Intact
ENSG00000101850	5.88275	0.00017171	0.00104115	0.867827	-0.204521	Intact
ENSG00000183654	5.05811	0.000795312	0.0037355	0.86789	-0.204416	Intact
ENSG00000104047	6.41605	5.71e-06	5.81e-05	0.867995	-0.204242	Intact
ENSG00000134864	6.4128	0.000209439	0.00122574	0.868013	-0.204211	Intact
ENSG00000234469	4.78119	0.0115255	0.0338583	0.868027	-0.204189	Intact
ENSG00000198892	6.8587	3.71e-07	5.64e-06	0.868073	-0.204112	Intact
ENSG00000177853	7.87918	2.85e-06	3.22e-05	0.868094	-0.204077	Intact
ENSG00000154822	8.31607	0.00502934	0.017213	0.868255	-0.203809	Intact
ENSG00000148288	5.67785	5.18e-06	5.37e-05	0.868306	-0.203724	Intact
ENSG00000252660	4.05686	0.0103466	0.0310633	0.868402	-0.203566	Intact
ENSG00000154065	5.52418	0.0013044	0.00562877	0.868564	-0.203296	Intact
ENSG00000197324	7.3634	0.000122309	0.000786278	0.868638	-0.203173	Intact
ENSG00000115841	6.89139	0.000157282	0.000967056	0.868783	-0.202932	Intact
ENSG00000103942	8.24278	6.62e-11	3.43e-09	0.868812	-0.202883	Intact
ENSG00000206559	5.34733	2.34e-07	3.77e-06	0.868823	-0.202867	Intact
ENSG00000114439	8.24572	0.00152842	0.00643435	0.868843	-0.202832	Intact
ENSG00000135622	6.55794	0.000155135	0.000956266	0.868857	-0.20281	Intact
ENSG00000222405	3.54372	0.000107567	0.000703555	0.868918	-0.202709	Intact
ENSG00000065559	7.59931	2.41e-07	3.87e-06	0.868922	-0.202701	Intact
ENSG00000162817	7.15903	9.87e-05	0.00065559	0.869093	-0.202417	Intact
ENSG00000100360	7.0186	1.89e-08	4.27e-07	0.869159	-0.202308	Intact
ENSG00000185988	5.78052	4.54e-07	6.66e-06	0.869177	-0.202278	Intact
ENSG00000146555	6.63466	0.00662415	0.0215891	0.869212	-0.20222	Intact
ENSG00000269741	5.29763	0.00204724	0.00817962	0.869224	-0.2022	Intact
ENSG00000151715	5.08789	3.77e-05	0.000291632	0.869231	-0.202188	Intact
ENSG00000252258	7.19877	0.000587501	0.00289999	0.86927	-0.202124	Intact
ENSG00000075275	5.11885	2.91e-06	3.28e-05	0.86931	-0.202057	Intact
ENSG00000141349	9.23328	2.79e-06	3.16e-05	0.869325	-0.202032	Intact
ENSG00000143194	4.01232	3.93e-06	4.24e-05	0.869371	-0.201957	Intact
ENSG00000170919	9.31022	0.000382911	0.00203593	0.869385	-0.201932	Intact
ENSG00000205220	5.39381	2.68e-06	3.06e-05	0.869472	-0.201789	Intact
ENSG00000167553	7.02278	0.00027026	0.00151467	0.869475	-0.201784	Intact
ENSG00000164463	8.55814	5.23e-07	7.52e-06	0.869594	-0.201586	Intact
ENSG00000134874	7.60703	0.00415562	0.0146988	0.869653	-0.201488	Intact
ENSG00000135124	6.62562	8.09e-06	7.84e-05	0.86978	-0.201278	Intact
ENSG00000103351	7.62237	2.95e-05	0.000237389	0.869981	-0.200944	Intact
ENSG00000172345	5.91905	0.000968743	0.00439877	0.870251	-0.200497	Intact
ENSG00000105894	7.28268	0.00413149	0.0146307	0.870326	-0.200372	Intact
ENSG00000186088	5.49526	0.00384983	0.0138407	0.870346	-0.200338	Intact
ENSG00000168676	5.53676	5.9e-07	8.34e-06	0.870388	-0.200269	Intact
ENSG00000167193	8.7074	6.33e-09	1.69e-07	0.870419	-0.200219	Intact
ENSG00000135973	4.20817	6.04e-08	1.17e-06	0.87042	-0.200216	Intact
ENSG00000143341	5.85127	0.0111528	0.0330408	0.870541	-0.200016	Intact
ENSG00000205837	4.66593	8.77e-06	8.39e-05	0.870686	-0.199775	Intact
ENSG00000172086	6.90318	1.86e-06	2.23e-05	0.87077	-0.199637	Intact
ENSG00000175611	6.04893	1.08e-08	2.67e-07	0.870831	-0.199536	Intact
ENSG00000141027	9.50189	3.57e-08	7.43e-07	0.870871	-0.199469	Intact
ENSG00000213889	5.32649	0.0092294	0.0282951	0.870951	-0.199336	Intact
ENSG00000187105	5.7195	0.000252502	0.00143193	0.87098	-0.199289	Intact
ENSG00000189149	4.31139	2.42e-05	0.000200387	0.871075	-0.199131	Intact
ENSG00000123096	7.07301	0.000330625	0.00179555	0.871123	-0.199051	Intact
ENSG00000150556	5.16552	0.000862385	0.00398215	0.871196	-0.198931	Intact
ENSG00000166946	7.68381	8.45e-12	5.64e-10	0.871211	-0.198907	Intact
ENSG00000005884	6.45647	0.000514724	0.00259186	0.871419	-0.198562	Intact
ENSG00000179930	4.74308	0.000175358	0.001059	0.871565	-0.198319	Intact
ENSG00000124570	7.30255	6.25e-08	1.2e-06	0.871687	-0.198119	Intact
ENSG00000185842	6.13158	0.00345826	0.0126448	0.87169	-0.198113	Intact
ENSG00000110274	7.02139	4.63e-08	9.32e-07	0.871867	-0.19782	Intact
ENSG00000163704	5.77082	1.38e-11	8.56e-10	0.872005	-0.197591	Intact
ENSG00000139631	8.17612	1.32e-07	2.31e-06	0.872162	-0.197331	Intact
ENSG00000177640	6.32158	1.07e-06	1.38e-05	0.872172	-0.197315	Intact
ENSG00000188778	4.46173	0.000774022	0.00365674	0.872181	-0.197301	Intact
ENSG00000127418	7.26327	0.00017525	0.00105865	0.872201	-0.197267	Intact
ENSG00000150455	6.11463	4.52e-09	1.27e-07	0.872204	-0.197262	Intact
ENSG00000154429	7.87256	3.73e-05	0.00028957	0.872222	-0.197232	Intact
ENSG00000202279	4.0629	0.000393494	0.00208064	0.872341	-0.197035	Intact
ENSG00000160991	8.46348	0.00183333	0.0074784	0.872366	-0.196995	Intact
ENSG00000114626	6.55952	7.22e-06	7.12e-05	0.872396	-0.196945	Intact
ENSG00000022267	9.71749	0.005305	0.0179203	0.872446	-0.196862	Intact
ENSG00000115194	6.01145	0.0142167	0.0401221	0.872474	-0.196816	Intact
ENSG00000078487	5.89111	1.07e-09	3.78e-08	0.872658	-0.196511	Intact
ENSG00000184055	6.39365	0.000150184	0.000932962	0.872666	-0.196499	Intact
ENSG00000072110	9.1785	0.0100125	0.0302872	0.872668	-0.196496	Intact
ENSG00000146373	6.81884	0.000167459	0.00102126	0.87269	-0.196459	Intact
ENSG00000204001	5.11566	9.24e-09	2.34e-07	0.872816	-0.196251	Intact
ENSG00000104901	5.54461	2.9e-05	0.000234125	0.872819	-0.196246	Intact
ENSG00000117676	6.89363	0.000145433	0.000910169	0.872824	-0.196238	Intact
ENSG00000198670	4.79443	0.000424182	0.00221059	0.872854	-0.196187	Intact
ENSG00000174938	8.86318	0.000547455	0.00273506	0.872907	-0.1961	Intact
ENSG00000171953	7.8685	4.64e-07	6.78e-06	0.872919	-0.19608	Intact
ENSG00000136449	5.25138	0.000814714	0.00380707	0.872977	-0.195985	Intact
ENSG00000156642	9.71919	7e-12	4.78e-10	0.8731	-0.195782	Intact
ENSG00000183741	7.84379	1.34e-06	1.68e-05	0.873171	-0.195663	Intact
ENSG00000168959	6.31883	0.00440871	0.0154305	0.873225	-0.195575	Intact
ENSG00000143409	7.65668	2.03e-05	0.000171597	0.873269	-0.195501	Intact
ENSG00000033867	8.31878	3.58e-05	0.000279278	0.873351	-0.195367	Intact
ENSG00000135823	8.92318	2.76e-07	4.37e-06	0.873457	-0.195191	Intact
ENSG00000109189	8.36267	0.000493237	0.00250224	0.873487	-0.195143	Intact
ENSG00000182108	7.51166	0.00420844	0.0148606	0.87353	-0.195071	Intact
ENSG00000169245	4.18787	0.0157465	0.043591	0.873618	-0.194925	Intact
ENSG00000181045	7.67863	0.000337493	0.00182672	0.873828	-0.194579	Intact
ENSG00000207749	3.79725	0.000207549	0.00121652	0.873872	-0.194507	Intact
ENSG00000042286	5.24311	1.61e-07	2.73e-06	0.873983	-0.194324	Intact
ENSG00000046647	7.90167	7.56e-08	1.42e-06	0.874026	-0.194253	Intact
ENSG00000137501	5.84126	0.000387487	0.00205552	0.874107	-0.194118	Intact
ENSG00000132716	6.76939	1.18e-05	0.000108456	0.874195	-0.193973	Intact
ENSG00000237172	5.0424	0.000681945	0.00329124	0.874312	-0.19378	Intact
ENSG00000187118	7.03813	0.00185472	0.00754956	0.874318	-0.193769	Intact
ENSG00000141696	6.49704	2.59e-10	1.13e-08	0.87432	-0.193766	Intact
ENSG00000134504	7.41413	8.24e-07	1.1e-05	0.874362	-0.193698	Intact
ENSG00000165406	9.30613	8.36e-07	1.12e-05	0.874408	-0.193622	Intact
ENSG00000259429	7.42105	0.000201936	0.00118859	0.874468	-0.193522	Intact
ENSG00000114978	8.52217	0.000105024	0.000689671	0.874473	-0.193515	Intact
ENSG00000120837	6.48809	7.48e-05	0.000519079	0.874575	-0.193347	Intact
ENSG00000182870	5.78308	0.00457948	0.0159274	0.87465	-0.193223	Intact
ENSG00000148057	7.61463	0.00010807	0.000706402	0.874679	-0.193174	Intact
ENSG00000181031	5.98654	4.23e-07	6.24e-06	0.874782	-0.193004	Intact
ENSG00000065923	7.17642	0.000950125	0.0043292	0.874812	-0.192956	Intact
ENSG00000176840	6.23338	0.010795	0.0321936	0.874879	-0.192845	Intact
ENSG00000167566	6.70351	0.000142947	0.00089755	0.874919	-0.192779	Intact
ENSG00000111057	5.59034	0.000254803	0.00144265	0.874984	-0.192671	Intact
ENSG00000166145	5.07098	1.75e-05	0.000151801	0.875052	-0.19256	Intact
ENSG00000221972	4.60204	7.23e-07	9.87e-06	0.875125	-0.19244	Intact
ENSG00000161681	7.17982	0.00834575	0.0260609	0.875156	-0.192388	Intact
ENSG00000142632	6.1308	2.29e-07	3.71e-06	0.875212	-0.192296	Intact
ENSG00000100478	6.26746	4.26e-06	4.53e-05	0.875282	-0.19218	Intact
ENSG00000162994	6.99295	2.1e-07	3.44e-06	0.875285	-0.192176	Intact
ENSG00000141034	6.84139	2.41e-06	2.79e-05	0.8753	-0.19215	Intact
ENSG00000186399	5.86414	0.0122169	0.0354438	0.875305	-0.192143	Intact
ENSG00000170545	6.48553	0.000274764	0.00153459	0.875311	-0.192132	Intact
ENSG00000198792	9.06757	0.000203537	0.00119653	0.875616	-0.19163	Intact
ENSG00000075426	8.25463	0.00536683	0.0181074	0.875623	-0.191618	Intact
ENSG00000148660	8.83075	0.000163291	0.000999034	0.875625	-0.191615	Intact
ENSG00000196220	9.28012	0.000792529	0.00372492	0.875652	-0.19157	Intact
ENSG00000142794	6.75675	4.48e-08	9.07e-07	0.875815	-0.191303	Intact
ENSG00000130827	9.06515	0.000413043	0.00216057	0.875836	-0.191267	Intact
ENSG00000067191	8.20578	0.000545058	0.00272568	0.876026	-0.190955	Intact
ENSG00000169306	5.33408	0.0031693	0.0117787	0.876049	-0.190917	Intact
ENSG00000092964	10.2225	4.93e-05	0.000366662	0.876176	-0.190708	Intact
ENSG00000124299	9.04669	0.000389878	0.00206508	0.87626	-0.19057	Intact
ENSG00000126775	7.88921	2.98e-08	6.38e-07	0.87636	-0.190405	Intact
ENSG00000204580	8.15309	0.00132525	0.0057091	0.87636	-0.190404	Intact
ENSG00000130768	5.11277	0.000136236	0.000861327	0.876372	-0.190385	Intact
ENSG00000162873	9.81594	0.0096862	0.0294465	0.876456	-0.190247	Intact
ENSG00000122863	6.60549	8.88e-05	0.000596935	0.876695	-0.189853	Intact
ENSG00000119632	6.97998	1.05e-05	9.84e-05	0.876823	-0.189642	Intact
ENSG00000103154	6.07356	0.0116642	0.034158	0.876951	-0.189433	Intact
ENSG00000188825	6.00328	0.00103929	0.00466038	0.876995	-0.18936	Intact
ENSG00000146070	5.99816	0.00556898	0.0186621	0.877029	-0.189303	Intact
ENSG00000070081	7.46976	9.56e-05	0.000637095	0.877058	-0.189256	Intact
ENSG00000105538	5.77426	0.000439088	0.00227305	0.87711	-0.18917	Intact
ENSG00000090863	9.7536	1.39e-07	2.41e-06	0.87718	-0.189056	Intact
ENSG00000066027	5.84711	0.00175172	0.00719717	0.877366	-0.188749	Intact
ENSG00000197536	7.06226	3.09e-06	3.44e-05	0.877438	-0.188631	Intact
ENSG00000159593	9.49795	2.1e-05	0.00017698	0.877602	-0.188362	Intact
ENSG00000084734	4.40594	5.71e-08	1.11e-06	0.877773	-0.18808	Intact
ENSG00000132635	8.18923	1.47e-08	3.45e-07	0.877809	-0.188021	Intact
ENSG00000135945	8.21773	8.68e-11	4.32e-09	0.877818	-0.188007	Intact
ENSG00000138111	7.76851	3.4e-07	5.25e-06	0.877868	-0.187925	Intact
ENSG00000108963	7.02989	1.28e-05	0.000116894	0.877875	-0.187913	Intact
ENSG00000108813	5.61404	8.7e-05	0.000588068	0.877907	-0.187859	Intact
ENSG00000277363	7.50323	0.00293351	0.0110449	0.877924	-0.187831	Intact
ENSG00000119977	8.45362	3.03e-07	4.75e-06	0.877955	-0.187781	Intact
ENSG00000175727	8.98474	0.000219665	0.00127671	0.877962	-0.187769	Intact
ENSG00000204947	5.80503	9.65e-08	1.76e-06	0.877982	-0.187737	Intact
ENSG00000134324	8.62358	0.000229445	0.00132222	0.877995	-0.187715	Intact
ENSG00000142920	7.25943	1.25e-05	0.000114515	0.878134	-0.187487	Intact
ENSG00000141456	7.39785	2.83e-08	6.12e-07	0.878148	-0.187464	Intact
ENSG00000239035	6.91472	0.00282025	0.0106816	0.878282	-0.187244	Intact
ENSG00000168589	3.86347	5.73e-09	1.55e-07	0.878298	-0.187218	Intact
ENSG00000170037	7.51948	3.44e-06	3.78e-05	0.878301	-0.187212	Intact
ENSG00000227234	3.23427	0.00127625	0.00552316	0.878357	-0.18712	Intact
ENSG00000121964	9.32951	9.88e-06	9.32e-05	0.878373	-0.187094	Intact
ENSG00000247596	8.13768	0.000204626	0.00120199	0.878394	-0.18706	Intact
ENSG00000115155	4.75631	5.49e-08	1.08e-06	0.878444	-0.186979	Intact
ENSG00000170464	8.601	6.02e-08	1.16e-06	0.878469	-0.186937	Intact
ENSG00000125409	4.17423	0.000128888	0.00082104	0.878517	-0.186858	Intact
ENSG00000166347	8.77858	0.000264231	0.00148682	0.878783	-0.186422	Intact
ENSG00000113749	4.98994	8.33e-05	0.000566848	0.878991	-0.186079	Intact
ENSG00000072952	5.23662	9.98e-05	0.000660577	0.879017	-0.186036	Intact
ENSG00000188878	7.44766	0.00102256	0.00459648	0.879177	-0.185774	Intact
ENSG00000159461	8.64466	0.000288761	0.00160044	0.879306	-0.185563	Intact
ENSG00000070159	5.82007	0.00586426	0.0194593	0.879334	-0.185516	Intact
ENSG00000243279	7.25944	0.00258959	0.00993439	0.879519	-0.185213	Intact
ENSG00000151116	7.72705	1.07e-07	1.93e-06	0.879523	-0.185206	Intact
ENSG00000207743	3.23473	2.79e-05	0.000226651	0.879559	-0.185148	Intact
ENSG00000243660	6.20713	0.000128635	0.000819681	0.879574	-0.185123	Intact
ENSG00000125434	5.74086	0.000195092	0.00115668	0.879579	-0.185116	Intact
ENSG00000107902	6.81169	0.000431561	0.00224237	0.879862	-0.184651	Intact
ENSG00000255192	7.13783	0.00349359	0.0127496	0.879991	-0.18444	Intact
ENSG00000162458	5.58946	2.83e-09	8.63e-08	0.880032	-0.184373	Intact
ENSG00000180347	4.79127	0.00131827	0.00568279	0.880078	-0.184297	Intact
ENSG00000196335	4.21533	7.6e-05	0.000525204	0.880243	-0.184026	Intact
ENSG00000171180	4.5282	0.00807119	0.0253428	0.880314	-0.183911	Intact
ENSG00000135052	10.1211	0.000108646	0.000709725	0.880337	-0.183872	Intact
ENSG00000111144	8.91036	6.61e-05	0.000469202	0.880369	-0.18382	Intact
ENSG00000125827	8.4124	0.000530456	0.00266343	0.880382	-0.183798	Intact
ENSG00000149582	7.45437	7.53e-07	1.02e-05	0.880401	-0.183768	Intact
ENSG00000076344	6.08183	0.00747431	0.0238028	0.88042	-0.183737	Intact
ENSG00000103494	7.62077	0.000473213	0.00241875	0.880507	-0.183593	Intact
ENSG00000179219	5.91044	3.73e-05	0.00028926	0.88053	-0.183557	Intact
ENSG00000183723	6.93889	0.000428535	0.00222896	0.880549	-0.183524	Intact
ENSG00000176715	7.1109	4.9e-08	9.78e-07	0.880639	-0.183377	Intact
ENSG00000204084	8.17108	4.05e-06	4.34e-05	0.880705	-0.183269	Intact
ENSG00000107719	6.02098	1.45e-05	0.000129481	0.880713	-0.183256	Intact
ENSG00000165821	7.8759	3.32e-05	0.000262719	0.880722	-0.183242	Intact
ENSG00000172794	4.83967	0.000947278	0.00431715	0.880856	-0.183022	Intact
ENSG00000179468	6.55756	0.00671147	0.0218195	0.880876	-0.18299	Intact
ENSG00000140526	8.75187	1.57e-05	0.000138445	0.880948	-0.182872	Intact
ENSG00000260347	5.54302	1.99e-05	0.00016895	0.88097	-0.182836	Intact
ENSG00000074803	4.405	0.000491613	0.00249641	0.881026	-0.182744	Intact
ENSG00000174611	5.23575	0.000289078	0.00160135	0.88106	-0.182688	Intact
ENSG00000151500	7.83981	2.77e-05	0.000225197	0.881147	-0.182545	Intact
ENSG00000172023	3.42236	0.00707701	0.0227651	0.881563	-0.181864	Intact
ENSG00000166262	5.69043	4.05e-05	0.000310258	0.881584	-0.181829	Intact
ENSG00000154917	8.42676	0.00175076	0.00719464	0.881597	-0.181809	Intact
ENSG00000267281	7.07916	0.00712999	0.0228935	0.881619	-0.181773	Intact
ENSG00000166188	6.89007	7.69e-06	7.5e-05	0.881754	-0.181552	Intact
ENSG00000198400	6.54784	0.0147924	0.0413967	0.881813	-0.181455	Intact
ENSG00000181264	6.3444	7.17e-06	7.08e-05	0.881851	-0.181394	Intact
ENSG00000163462	6.10605	3.95e-05	0.000302856	0.881858	-0.181381	Intact
ENSG00000196549	4.01213	0.0175932	0.0475574	0.882116	-0.18096	Intact
ENSG00000068366	7.76556	0.00225906	0.0088775	0.882129	-0.180938	Intact
ENSG00000276031	4.60774	5.02e-06	5.22e-05	0.882221	-0.180788	Intact
ENSG00000149575	5.18342	2.03e-05	0.000171298	0.882244	-0.18075	Intact
ENSG00000170291	8.96546	8.97e-06	8.56e-05	0.882267	-0.180712	Intact
ENSG00000107960	6.76114	1.02e-05	9.58e-05	0.882284	-0.180685	Intact
ENSG00000165028	6.57798	0.000184153	0.00110356	0.882289	-0.180677	Intact
ENSG00000076351	7.99598	0.000294656	0.00162711	0.882291	-0.180674	Intact
ENSG00000166532	8.75234	0.000872801	0.00402299	0.882352	-0.180573	Intact
ENSG00000213801	3.98916	0.0110053	0.0326894	0.882479	-0.180366	Intact
ENSG00000276843	4.14503	0.018239	0.0488777	0.882541	-0.180264	Intact
ENSG00000163364	4.26757	0.000861188	0.00398002	0.882552	-0.180247	Intact
ENSG00000188921	4.78414	0.000912846	0.0041873	0.882682	-0.180034	Intact
ENSG00000168487	7.24591	0.000190063	0.00113103	0.882691	-0.180019	Intact
ENSG00000003402	8.25872	0.00253777	0.00977189	0.882791	-0.179856	Intact
ENSG00000125826	8.52946	2.11e-07	3.46e-06	0.882825	-0.179801	Intact
ENSG00000200508	2.82373	0.000286862	0.00159075	0.882835	-0.179784	Intact
ENSG00000008300	8.13627	9.92e-06	9.36e-05	0.882851	-0.179758	Intact
ENSG00000064270	5.39649	0.00224739	0.00883661	0.883037	-0.179455	Intact
ENSG00000155465	4.89257	0.000187654	0.0011207	0.883054	-0.179427	Intact
ENSG00000102302	8.10807	1.32e-05	0.00011949	0.883127	-0.179307	Intact
ENSG00000145476	7.88761	0.00164952	0.00686175	0.883178	-0.179224	Intact
ENSG00000252489	3.89599	3.86e-06	4.18e-05	0.883178	-0.179224	Intact
ENSG00000169239	7.14236	1.48e-07	2.55e-06	0.883224	-0.179148	Intact
ENSG00000179406	7.60922	0.00196407	0.00790287	0.883536	-0.178639	Intact
ENSG00000100599	6.41557	1.36e-06	1.7e-05	0.883548	-0.178619	Intact
ENSG00000124067	6.47396	0.00348818	0.0127343	0.883583	-0.178563	Intact
ENSG00000197566	6.97942	1.55e-05	0.0001373	0.883661	-0.178435	Intact
ENSG00000138400	5.28702	0.00345756	0.0126444	0.883671	-0.178419	Intact
ENSG00000273749	7.96841	0.00285242	0.0107879	0.883773	-0.178252	Intact
ENSG00000177614	8.50224	0.00799274	0.0251604	0.883808	-0.178195	Intact
ENSG00000054392	6.18456	0.00157076	0.00657442	0.883838	-0.178145	Intact
ENSG00000164050	8.13868	6.49e-06	6.48e-05	0.884045	-0.177808	Intact
ENSG00000204385	5.07086	1.14e-06	1.46e-05	0.884113	-0.177698	Intact
ENSG00000172361	5.201	0.000449174	0.00231671	0.884168	-0.177607	Intact
ENSG00000152620	7.94015	2.32e-06	2.7e-05	0.884298	-0.177395	Intact
ENSG00000110492	8.77196	0.000762313	0.00361116	0.884331	-0.177341	Intact
ENSG00000170412	5.84715	0.000399541	0.00210723	0.884384	-0.177256	Intact
ENSG00000201920	4.14351	8.88e-05	0.000596935	0.884471	-0.177113	Intact
ENSG00000103042	6.60161	2.81e-08	6.09e-07	0.884542	-0.176998	Intact
ENSG00000225953	3.88303	0.00216532	0.00856796	0.884705	-0.176731	Intact
ENSG00000163617	6.34307	0.000177191	0.00106915	0.884832	-0.176524	Intact
ENSG00000014216	7.8828	6.24e-06	6.27e-05	0.884863	-0.176475	Intact
ENSG00000175220	9.39373	5.2e-06	5.39e-05	0.884865	-0.17647	Intact
ENSG00000164603	8.93243	7.54e-06	7.39e-05	0.884869	-0.176464	Intact
ENSG00000162543	5.66701	0.00233726	0.00912175	0.884883	-0.176442	Intact
ENSG00000182606	8.63636	0.000930486	0.00425354	0.884889	-0.176431	Intact
ENSG00000011083	5.02179	0.000128072	0.000817237	0.885043	-0.17618	Intact
ENSG00000139910	8.99266	0.0132745	0.0379158	0.885162	-0.175987	Intact
ENSG00000173156	5.57164	2.22e-08	4.92e-07	0.885312	-0.175742	Intact
ENSG00000124549	4.56803	0.00102575	0.00460888	0.885418	-0.17557	Intact
ENSG00000196705	8.18031	5.66e-06	5.77e-05	0.885455	-0.175509	Intact
ENSG00000162461	6.49292	4.17e-05	0.000317588	0.885606	-0.175264	Intact
ENSG00000198189	9.9904	0.0127169	0.0366016	0.885665	-0.175167	Intact
ENSG00000183067	4.48959	0.0019258	0.00778315	0.885728	-0.175065	Intact
ENSG00000102468	4.89448	0.010589	0.0316645	0.885771	-0.174995	Intact
ENSG00000151553	8.4503	1.95e-08	4.4e-07	0.885809	-0.174932	Intact
ENSG00000199506	3.7678	0.000114128	0.000740021	0.885848	-0.174869	Intact
ENSG00000185875	7.24941	5.88e-05	0.000424747	0.885905	-0.174777	Intact
ENSG00000150977	6.77377	0.0022396	0.00881257	0.885913	-0.174762	Intact
ENSG00000133067	4.33673	0.00100052	0.00451481	0.885936	-0.174725	Intact
ENSG00000154188	5.00134	0.0136757	0.0388664	0.885937	-0.174725	Intact
ENSG00000084710	8.24822	0.00242239	0.00940163	0.885967	-0.174675	Intact
ENSG00000100968	6.00222	0.00311155	0.0116068	0.886053	-0.174535	Intact
ENSG00000148950	6.48922	0.0077937	0.0246371	0.886096	-0.174465	Intact
ENSG00000160539	6.21944	7.43e-08	1.4e-06	0.886154	-0.174371	Intact
ENSG00000186847	5.38962	0.0126154	0.0363791	0.886165	-0.174353	Intact
ENSG00000251493	5.52179	0.00873805	0.027049	0.886202	-0.174292	Intact
ENSG00000124357	9.75212	3.09e-12	2.39e-10	0.886231	-0.174245	Intact
ENSG00000275591	5.86644	0.00204977	0.00818818	0.886238	-0.174233	Intact
ENSG00000157379	7.50789	8.6e-08	1.59e-06	0.886266	-0.174188	Intact
ENSG00000078177	8.10849	4.87e-07	7.08e-06	0.886379	-0.174005	Intact
ENSG00000050820	6.82234	1.4e-06	1.74e-05	0.886531	-0.173757	Intact
ENSG00000140948	9.07548	0.000190224	0.00113123	0.886612	-0.173625	Intact
ENSG00000241774	5.25369	2.25e-05	0.000187882	0.886614	-0.173622	Intact
ENSG00000103852	6.48227	0.000190929	0.00113478	0.886709	-0.173468	Intact
ENSG00000222205	3.93935	0.00200775	0.00804323	0.886745	-0.173409	Intact
ENSG00000175662	8.23667	0.000345133	0.00186089	0.88675	-0.173401	Intact
ENSG00000169862	10.1528	0.00149035	0.00629426	0.886864	-0.173215	Intact
ENSG00000106479	7.65753	2.57e-08	5.61e-07	0.886892	-0.173169	Intact
ENSG00000106100	5.6766	7.2e-05	0.000503889	0.886904	-0.17315	Intact
ENSG00000106952	5.67077	0.000430185	0.00223577	0.886971	-0.173042	Intact
ENSG00000166682	5.26315	0.000209275	0.00122512	0.887011	-0.172977	Intact
ENSG00000213859	5.40083	3.54e-09	1.03e-07	0.887101	-0.172829	Intact
ENSG00000204271	8.40558	0.000497158	0.00251606	0.887154	-0.172743	Intact
ENSG00000129255	8.45099	0.000578994	0.00286727	0.887218	-0.17264	Intact
ENSG00000125841	8.37711	1.91e-05	0.000163627	0.887349	-0.172426	Intact
ENSG00000047644	7.50108	1.65e-06	2.01e-05	0.887469	-0.172231	Intact
ENSG00000149090	5.3853	0.00525926	0.0178	0.887555	-0.172091	Intact
ENSG00000172465	7.03013	8.44e-06	8.13e-05	0.887588	-0.172038	Intact
ENSG00000188747	6.81077	1.69e-05	0.000147996	0.887619	-0.171987	Intact
ENSG00000131899	7.16286	1.27e-05	0.000115641	0.887734	-0.171801	Intact
ENSG00000187260	6.45104	0.000310052	0.00170007	0.887737	-0.171795	Intact
ENSG00000185664	4.154	0.00038345	0.0020377	0.887843	-0.171623	Intact
ENSG00000167721	7.2864	0.000128484	0.000818966	0.887898	-0.171534	Intact
ENSG00000176046	6.7841	0.00876518	0.027117	0.887961	-0.171431	Intact
ENSG00000007255	6.25922	8.28e-07	1.11e-05	0.888132	-0.171155	Intact
ENSG00000132376	7.19304	2.74e-05	0.000222871	0.888195	-0.171052	Intact
ENSG00000055163	9.69748	0.00503254	0.0172184	0.888376	-0.170758	Intact
ENSG00000183011	7.43631	3.98e-06	4.28e-05	0.888394	-0.170728	Intact
ENSG00000185716	7.89644	0.00468092	0.0162185	0.888544	-0.170486	Intact
ENSG00000146535	8.26534	9.09e-09	2.31e-07	0.888617	-0.170367	Intact
ENSG00000137101	5.56114	2.24e-05	0.000187612	0.888641	-0.170328	Intact
ENSG00000184867	6.53427	1.95e-06	2.32e-05	0.888642	-0.170326	Intact
ENSG00000047662	6.72282	0.00731538	0.0233923	0.888655	-0.170305	Intact
ENSG00000141002	8.4315	1.85e-06	2.22e-05	0.888756	-0.170141	Intact
ENSG00000138311	4.4994	3.25e-05	0.000258051	0.888783	-0.170098	Intact
ENSG00000075399	6.85346	5.88e-07	8.3e-06	0.888794	-0.17008	Intact
ENSG00000184612	3.35317	2.76e-05	0.000224249	0.888812	-0.17005	Intact
ENSG00000165802	8.01935	0.0047323	0.0163481	0.888815	-0.170044	Intact
ENSG00000135709	7.21919	0.0160619	0.044266	0.888904	-0.169901	Intact
ENSG00000138336	8.82385	0.000132018	0.000837937	0.888951	-0.169824	Intact
ENSG00000101194	5.16953	0.000203007	0.00119374	0.888973	-0.169788	Intact
ENSG00000158019	8.12397	2.24e-08	4.97e-07	0.88911	-0.169567	Intact
ENSG00000178607	7.40057	0.0105606	0.0315933	0.889189	-0.169438	Intact
ENSG00000159184	4.12884	0.00890345	0.0274559	0.889255	-0.169331	Intact
ENSG00000149260	6.76009	1.18e-05	0.000109042	0.889269	-0.169308	Intact
ENSG00000171109	8.05105	1.06e-05	9.96e-05	0.889269	-0.169307	Intact
ENSG00000164111	9.82602	0.00735343	0.023489	0.889435	-0.169039	Intact
ENSG00000167123	6.91885	0.00758879	0.0240835	0.889442	-0.169028	Intact
ENSG00000141380	8.34982	1.68e-08	3.92e-07	0.889523	-0.168896	Intact
ENSG00000166734	9.23144	1.05e-09	3.74e-08	0.889538	-0.168872	Intact
ENSG00000092054	5.91658	9.36e-06	8.89e-05	0.889583	-0.168799	Intact
ENSG00000103544	8.08344	6.75e-10	2.53e-08	0.889594	-0.16878	Intact
ENSG00000116266	7.63719	3.57e-05	0.000278936	0.889642	-0.168703	Intact
ENSG00000178026	6.89226	2.56e-06	2.95e-05	0.889666	-0.168664	Intact
ENSG00000113441	9.47727	0.00141217	0.00602214	0.889666	-0.168664	Intact
ENSG00000183397	6.65621	5.66e-06	5.77e-05	0.889727	-0.168565	Intact
ENSG00000088367	8.23246	0.0038432	0.0138239	0.889827	-0.168404	Intact
ENSG00000186493	4.94523	0.000147858	0.000923146	0.889856	-0.168357	Intact
ENSG00000102904	5.05167	1.61e-07	2.72e-06	0.889916	-0.16826	Intact
ENSG00000176485	5.52908	0.00241298	0.00937375	0.889991	-0.168138	Intact
ENSG00000163683	8.25765	0.0003085	0.00169333	0.890171	-0.167845	Intact
ENSG00000175170	5.6053	0.0180678	0.0485433	0.890183	-0.167826	Intact
ENSG00000141519	7.81675	0.00664051	0.0216357	0.890238	-0.167737	Intact
ENSG00000007541	7.234	5.21e-06	5.39e-05	0.890239	-0.167736	Intact
ENSG00000235865	4.11015	6.21e-07	8.71e-06	0.890416	-0.167449	Intact
ENSG00000103150	6.10906	3.52e-06	3.85e-05	0.890433	-0.167421	Intact
ENSG00000005448	6.94	1.6e-05	0.000141064	0.89054	-0.167248	Intact
ENSG00000132405	8.67983	6.6e-07	9.11e-06	0.890599	-0.167152	Intact
ENSG00000159263	5.05721	0.0125881	0.0363055	0.890654	-0.167062	Intact
ENSG00000182511	5.32081	5.63e-08	1.1e-06	0.890809	-0.166812	Intact
ENSG00000105355	6.6306	0.0109283	0.0325161	0.890821	-0.166793	Intact
ENSG00000151690	7.13636	0.0121986	0.0354039	0.890974	-0.166546	Intact
ENSG00000187824	5.63848	0.00446589	0.0155943	0.891041	-0.166437	Intact
ENSG00000163521	6.42633	1.48e-07	2.55e-06	0.891043	-0.166432	Intact
ENSG00000143125	5.80204	0.000572103	0.00283932	0.891054	-0.166415	Intact
ENSG00000163673	5.58088	0.00806588	0.0253299	0.89107	-0.16639	Intact
ENSG00000204406	9.03466	1.07e-08	2.66e-07	0.891181	-0.166209	Intact
ENSG00000132382	7.28146	0.000164093	0.00100336	0.89125	-0.166098	Intact
ENSG00000140943	9.76441	6.07e-06	6.13e-05	0.891304	-0.166011	Intact
ENSG00000151929	6.80829	0.0106611	0.0318622	0.891344	-0.165946	Intact
ENSG00000081377	5.85479	0.000147163	0.000919628	0.891423	-0.165817	Intact
ENSG00000163110	7.48932	0.0132228	0.0377783	0.891438	-0.165793	Intact
ENSG00000112851	9.41256	9.22e-07	1.22e-05	0.891441	-0.165789	Intact
ENSG00000110237	6.81902	0.000120293	0.000774263	0.891572	-0.165576	Intact
ENSG00000054356	7.73745	0.0172511	0.0468134	0.891589	-0.16555	Intact
ENSG00000198520	6.30054	0.00277443	0.0105403	0.891646	-0.165457	Intact
ENSG00000167711	5.24795	0.000600379	0.00295316	0.891774	-0.16525	Intact
ENSG00000133460	5.5595	0.000120194	0.000773863	0.891795	-0.165216	Intact
ENSG00000119927	7.44295	0.000265992	0.00149393	0.891826	-0.165166	Intact
ENSG00000146221	6.14085	0.00113673	0.00501638	0.891892	-0.165059	Intact
ENSG00000184371	6.95504	0.000801179	0.00375886	0.891933	-0.164993	Intact
ENSG00000156515	7.1482	0.000369717	0.0019752	0.891993	-0.164895	Intact
ENSG00000099994	6.79509	0.00651761	0.0213013	0.892126	-0.164681	Intact
ENSG00000143994	5.08007	2.24e-08	4.97e-07	0.892145	-0.16465	Intact
ENSG00000186510	5.12646	6.09e-06	6.14e-05	0.892166	-0.164615	Intact
ENSG00000107593	4.41344	7.32e-05	0.000509582	0.892211	-0.164542	Intact
ENSG00000182220	10.327	0.000370305	0.00197784	0.892214	-0.164538	Intact
ENSG00000230426	3.75379	0.00329921	0.0121776	0.892222	-0.164525	Intact
ENSG00000164951	9.01795	0.000407263	0.00213724	0.892261	-0.164463	Intact
ENSG00000199069	3.22618	8.81e-05	0.000593716	0.892334	-0.164343	Intact
ENSG00000252745	3.19664	0.0137637	0.039069	0.892347	-0.164324	Intact
ENSG00000168477	5.92973	0.000593851	0.00292653	0.892398	-0.164242	Intact
ENSG00000201532	5.49267	0.000269726	0.00151248	0.892479	-0.164111	Intact
ENSG00000206650	5.59212	0.00183558	0.0074847	0.892491	-0.16409	Intact
ENSG00000140718	9.20493	1.74e-07	2.92e-06	0.892583	-0.163941	Intact
ENSG00000186104	7.74243	3.78e-05	0.000292522	0.892643	-0.163845	Intact
ENSG00000053918	5.10554	0.000237365	0.0013604	0.892725	-0.163712	Intact
ENSG00000136305	5.98828	0.0118955	0.0346933	0.892821	-0.163557	Intact
ENSG00000150076	5.90567	0.00617004	0.0203105	0.892865	-0.163486	Intact
ENSG00000187079	9.25161	0.0184946	0.0494348	0.893014	-0.163245	Intact
ENSG00000101439	9.60016	0.00205912	0.00821928	0.893054	-0.16318	Intact
ENSG00000133943	7.64308	5.2e-05	0.000384027	0.893067	-0.163159	Intact
ENSG00000142733	6.78262	0.000198918	0.00117496	0.893075	-0.163147	Intact
ENSG00000181513	6.12647	1.95e-06	2.33e-05	0.893095	-0.163114	Intact
ENSG00000196368	7.33392	0.00352604	0.0128449	0.893114	-0.163084	Intact
ENSG00000135698	7.04392	3.83e-05	0.000295761	0.893262	-0.162844	Intact
ENSG00000188385	4.96262	1.86e-05	0.00015956	0.89335	-0.162702	Intact
ENSG00000129187	8.9458	0.00426299	0.0150179	0.89343	-0.162573	Intact
ENSG00000207283	3.45652	0.00592454	0.019616	0.893442	-0.162554	Intact
ENSG00000087903	5.67764	0.00101268	0.00455889	0.893594	-0.162308	Intact
ENSG00000264589	4.92849	0.000724171	0.00346246	0.89365	-0.162219	Intact
ENSG00000162522	6.22968	0.000788277	0.00371074	0.893693	-0.162149	Intact
ENSG00000133639	9.90972	3.54e-05	0.0002772	0.893826	-0.161935	Intact
ENSG00000133065	7.83886	0.0016034	0.00669107	0.893834	-0.161921	Intact
ENSG00000128487	7.69804	0.0124062	0.0358693	0.893834	-0.161921	Intact
ENSG00000263841	3.13553	1.29e-09	4.44e-08	0.893898	-0.161817	Intact
ENSG00000105738	8.37518	0.000425608	0.00221582	0.893904	-0.161808	Intact
ENSG00000114353	6.74569	1.3e-06	1.64e-05	0.893962	-0.161715	Intact
ENSG00000180383	5.54749	1.58e-06	1.93e-05	0.894041	-0.161587	Intact
ENSG00000131069	6.75725	0.00145369	0.00615428	0.894071	-0.161539	Intact
ENSG00000177628	7.69254	2.66e-05	0.000217645	0.894101	-0.16149	Intact
ENSG00000186806	5.81033	2.28e-05	0.000190226	0.894108	-0.161478	Intact
ENSG00000100503	7.83063	0.0137943	0.0391347	0.894225	-0.161291	Intact
ENSG00000117533	9.2926	0.00174025	0.00716047	0.894276	-0.161208	Intact
ENSG00000197956	5.76376	5.33e-05	0.000391425	0.894305	-0.161161	Intact
ENSG00000029725	9.13126	0.000167418	0.00102126	0.894398	-0.161012	Intact
ENSG00000073711	7.23012	0.00131404	0.00566685	0.894421	-0.160973	Intact
ENSG00000197329	8.6858	0.00561817	0.018779	0.894423	-0.16097	Intact
ENSG00000172346	6.27963	0.00123568	0.00537525	0.894484	-0.160872	Intact
ENSG00000137462	4.36377	0.00450244	0.0157063	0.894527	-0.160803	Intact
ENSG00000128617	4.77822	0.00117799	0.00516274	0.894586	-0.160709	Intact
ENSG00000188690	8.44417	1.96e-07	3.26e-06	0.894669	-0.160574	Intact
ENSG00000019144	6.57428	0.000852066	0.00394566	0.894707	-0.160513	Intact
ENSG00000222973	3.3801	0.00208955	0.00831709	0.894794	-0.160373	Intact
ENSG00000034713	10.5255	5.77e-06	5.87e-05	0.894808	-0.160351	Intact
ENSG00000170390	9.01977	0.000334939	0.00181523	0.894861	-0.160264	Intact
ENSG00000253026	3.21851	9.27e-05	0.000619641	0.894877	-0.160239	Intact
ENSG00000102984	7.33728	0.000967334	0.00439428	0.894894	-0.16021	Intact
ENSG00000065613	8.80605	3.45e-05	0.000270851	0.894902	-0.160198	Intact
ENSG00000146733	8.36942	0.000315341	0.00172653	0.894923	-0.160164	Intact
ENSG00000053371	8.62959	5.58e-08	1.09e-06	0.895086	-0.159902	Intact
ENSG00000113790	5.51347	0.00515033	0.0175387	0.89513	-0.159831	Intact
ENSG00000154153	6.13101	0.0130851	0.0374409	0.895139	-0.159817	Intact
ENSG00000198521	8.44483	0.00877045	0.0271293	0.89517	-0.159766	Intact
ENSG00000148814	7.20929	3.49e-05	0.000274344	0.895198	-0.159721	Intact
ENSG00000252115	5.32242	0.00121928	0.00531984	0.89531	-0.159541	Intact
ENSG00000125122	5.88867	1.45e-07	2.5e-06	0.895344	-0.159486	Intact
ENSG00000117862	9.33492	0.00111436	0.0049322	0.895477	-0.159271	Intact
ENSG00000143554	6.13639	8.01e-07	1.08e-05	0.895533	-0.159182	Intact
ENSG00000101400	6.01944	1.56e-05	0.000138061	0.895596	-0.15908	Intact
ENSG00000012174	8.65385	1.65e-07	2.78e-06	0.895617	-0.159046	Intact
ENSG00000155542	5.4933	0.000994218	0.004496	0.895628	-0.159028	Intact
ENSG00000198753	6.0972	0.000119594	0.000770944	0.89564	-0.159009	Intact
ENSG00000135917	4.53936	0.000837256	0.00388907	0.895646	-0.158999	Intact
ENSG00000112182	7.3357	0.0120279	0.0350017	0.89569	-0.158929	Intact
ENSG00000186951	7.00867	0.00142678	0.0060672	0.895704	-0.158906	Intact
ENSG00000083290	8.52127	0.000946013	0.00431232	0.895757	-0.158821	Intact
ENSG00000198915	6.11686	0.0125758	0.0362749	0.895765	-0.158807	Intact
ENSG00000107829	7.75154	1.36e-06	1.7e-05	0.895776	-0.15879	Intact
ENSG00000102977	7.32414	8.32e-05	0.000566463	0.895791	-0.158765	Intact
ENSG00000172031	5.15162	6.99e-06	6.92e-05	0.895816	-0.158726	Intact
ENSG00000178921	7.01974	0.000419413	0.00218844	0.895857	-0.158659	Intact
ENSG00000131165	7.51948	7.85e-09	2.02e-07	0.89587	-0.158639	Intact
ENSG00000199241	3.09322	0.0110063	0.0326894	0.895968	-0.158481	Intact
ENSG00000106460	8.8276	9.81e-09	2.46e-07	0.896049	-0.15835	Intact
ENSG00000178171	6.37755	0.00228239	0.00894912	0.896075	-0.158308	Intact
ENSG00000114126	8.53457	0.011744	0.0343229	0.896086	-0.158292	Intact
ENSG00000229809	6.89885	3.84e-07	5.77e-06	0.896234	-0.158052	Intact
ENSG00000160219	5.72386	0.00476579	0.0164287	0.896369	-0.157835	Intact
ENSG00000154957	6.87749	3.51e-05	0.000275182	0.896387	-0.157806	Intact
ENSG00000166321	4.47358	0.000388964	0.00206179	0.89641	-0.15777	Intact
ENSG00000163013	5.73022	3.38e-05	0.000266509	0.896485	-0.157648	Intact
ENSG00000168026	6.08154	0.0017184	0.00709354	0.896502	-0.157621	Intact
ENSG00000166821	5.89469	8.42e-05	0.000572549	0.89656	-0.157527	Intact
ENSG00000136848	7.33566	0.000261522	0.00147473	0.896567	-0.157517	Intact
ENSG00000167525	6.50612	3.13e-05	0.000249826	0.896609	-0.157449	Intact
ENSG00000139323	8.17447	0.000437288	0.00226541	0.896677	-0.15734	Intact
ENSG00000264613	3.6622	0.000153083	0.000946917	0.896691	-0.157317	Intact
ENSG00000169299	7.60475	0.00561747	0.018779	0.896719	-0.157272	Intact
ENSG00000177200	9.72939	1.36e-05	0.000122598	0.896767	-0.157195	Intact
ENSG00000239175	7.86011	0.000826226	0.00384889	0.896851	-0.15706	Intact
ENSG00000169189	8.69011	0.000126335	0.00080845	0.896861	-0.157044	Intact
ENSG00000171121	6.73944	7.7e-06	7.51e-05	0.896907	-0.156969	Intact
ENSG00000103507	7.76977	1.98e-07	3.27e-06	0.896908	-0.156969	Intact
ENSG00000213923	10.5243	0.00013798	0.000870497	0.896913	-0.15696	Intact
ENSG00000103021	7.03081	0.0161371	0.044415	0.896921	-0.156948	Intact
ENSG00000197291	7.68816	0.00336771	0.0123826	0.897099	-0.156661	Intact
ENSG00000170677	7.14586	0.00137963	0.00590131	0.897125	-0.15662	Intact
ENSG00000088899	6.42578	7.26e-05	0.000506322	0.89713	-0.156611	Intact
ENSG00000115129	6.79089	0.00106473	0.00474948	0.897241	-0.156432	Intact
ENSG00000103168	7.58173	0.000157515	0.000967639	0.89727	-0.156386	Intact
ENSG00000215644	5.34723	0.00745439	0.0237501	0.897296	-0.156345	Intact
ENSG00000140254	6.36865	0.000155099	0.000956266	0.89731	-0.156322	Intact
ENSG00000197165	5.46252	0.00424223	0.0149602	0.897417	-0.15615	Intact
ENSG00000109046	11.0039	0.000389265	0.00206263	0.897489	-0.156033	Intact
ENSG00000109832	7.52286	0.0161036	0.044363	0.897529	-0.15597	Intact
ENSG00000144040	6.78427	1.25e-05	0.000114006	0.897594	-0.155865	Intact
ENSG00000207942	3.43691	0.00070031	0.00336828	0.897633	-0.155802	Intact
ENSG00000100373	5.46321	5.53e-09	1.5e-07	0.897715	-0.155671	Intact
ENSG00000168032	4.85892	0.00179952	0.0073605	0.897898	-0.155377	Intact
ENSG00000166548	7.60535	4e-06	4.29e-05	0.897925	-0.155333	Intact
ENSG00000128709	6.01815	0.00498009	0.0170639	0.89797	-0.155261	Intact
ENSG00000196890	6.07051	0.0091766	0.0281866	0.898033	-0.155159	Intact
ENSG00000070269	8.76436	0.00330918	0.012208	0.898068	-0.155103	Intact
ENSG00000252395	4.63986	5.04e-07	7.29e-06	0.898073	-0.155096	Intact
ENSG00000279380	4.3636	0.000638616	0.00311285	0.89809	-0.155068	Intact
ENSG00000164385	5.43741	1.39e-06	1.73e-05	0.898134	-0.154998	Intact
ENSG00000184227	5.04128	0.000606108	0.00297647	0.898145	-0.15498	Intact
ENSG00000100490	6.13217	0.00681116	0.022072	0.898146	-0.154979	Intact
ENSG00000059758	9.18198	0.00183502	0.00748386	0.898345	-0.154659	Intact
ENSG00000173681	7.52775	1.77e-05	0.000153378	0.898363	-0.15463	Intact
ENSG00000127774	6.04179	2.1e-05	0.000177218	0.898388	-0.154589	Intact
ENSG00000202383	2.6912	5.77e-05	0.000417779	0.898393	-0.154582	Intact
ENSG00000129084	6.84272	0.00758038	0.024065	0.89845	-0.15449	Intact
ENSG00000145882	7.87147	0.000545319	0.00272608	0.898465	-0.154466	Intact
ENSG00000101040	8.60699	9.09e-07	1.2e-05	0.898521	-0.154376	Intact
ENSG00000171471	9.03212	0.00251626	0.00969971	0.898554	-0.154322	Intact
ENSG00000222969	4.69055	0.000101537	0.00067037	0.898592	-0.154263	Intact
ENSG00000171861	6.70487	2.35e-05	0.00019607	0.898655	-0.154162	Intact
[truncated: 5,891 more rows]

## Sheet: Supplementary table 3
Supplementary table 3. KEGG TOP 10 enriched pathways
GeneSet		Description	Size	Overlap	Expect	EnrichmentRatio	p.Value	FDR
hsa05033	1	Nicotine addiction	40	6	0.572136	10.487	1.91671e-05	0.00312423
hsa05412	2	Arrhythmogenic right ventricular cardiomyopathy (ARVC)	72	8	1.02984	7.76816	7.50317e-06	0.00244603
hsa05410	3	Hypertrophic cardiomyopathy (HCM)	83	7	1.18718	5.89632	0.000170297	0.013152
hsa04727	4	GABAergic synapse	88	7	1.2587	5.5613	0.000245622	0.013152
hsa05414	5	Dilated cardiomyopathy (DCM)	90	7	1.28731	5.43771	0.000282405	0.013152
hsa04728	6	Dopaminergic synapse	131	9	1.87375	4.80321	9.83805e-05	0.0106907
hsa04725	7	Cholinergic synapse	112	7	1.60198	4.36959	0.00105966	0.0383326
hsa04724	8	Glutamatergic synapse	114	7	1.63059	4.29293	0.00117585	0.0383326
hsa04723	9	Retrograde endocannabinoid signaling	148	9	2.1169	4.25149	0.00024937	0.013152
hsa04310	10	Wnt signaling pathway	146	8	2.0883	3.83087	0.00110571	0.0383326

## Sheet: Supplementary table 4
Supplementary table 4. STRING protein-protein interation (PPI) anlaysis results
node1	node2	neighborhood_on_chromosome	gene_fusion	phylogenetic_cooccurrence	homology	coexpression	experimentally_determined_interaction	database_annotated	automated_textmining	combined_score
PRLR	PRL	0	0	0	0	0.062	0.87	0.9	0.958	0.999
FGFR1	FGF9	0	0	0	0	0.063	0.863	0.9	0.749	0.996
HIST1H4D	HIST1H3J	0	0.008	0	0	0.328	0.852	0.9	0.586	0.995
HIST1H4L	HIST1H3J	0	0.008	0	0	0.268	0.852	0.9	0.586	0.994
PDE6G	GNAT1	0	0	0	0	0.171	0.549	0.9	0.719	0.988
CACNA2D1	CACNA1D	0	0	0	0	0.087	0.285	0.9	0.825	0.987
GABRG2	GABRA5	0	0	0	0.898	0.334	0.799	0.9	0.684	0.986
HIST1H4L	HIST1H4D	0	0	0	0.984	0.338	0.8	0.9	0.426	0.985
CNGA3	PDE6H	0	0	0	0	0.061	0	0.9	0.768	0.976
BAMBI	BMP4	0	0	0	0	0.095	0	0.9	0.744	0.974
RUNX2	SOX9	0	0	0	0	0	0.379	0	0.945	0.964
CACNA2D1	CACNG3	0	0	0	0	0.086	0	0.9	0.644	0.964
TTR	RBP1	0	0	0	0	0.064	0	0.9	0.559	0.955
CACNA1D	CACNG3	0	0	0	0	0.062	0	0.9	0.5	0.949
LIN7A	PPFIA4	0	0.01	0	0	0.115	0.185	0.9	0.384	0.949
GRIN2A	RASGRF2	0	0	0	0	0.098	0	0.9	0.463	0.947
TNC	BMP4	0	0	0	0	0.065	0	0.9	0.424	0.941
ADAM12	ITGA9	0	0	0	0	0	0	0.9	0.312	0.928
TNC	ITGA9	0	0	0	0	0.061	0.161	0.9	0.127	0.922
PLXNC1	SEMA6A	0	0	0	0	0	0.188	0	0.899	0.915
PLCB1	GNAT1	0	0	0	0	0	0.132	0.9	0.085	0.913
DKK2	DKK4	0	0	0	0.858	0	0	0.9	0.8	0.911
CHRM4	HCAR1	0	0	0	0	0	0	0.9	0.12	0.908
TFAP2A	TGFA	0	0	0	0	0	0	0.9	0.121	0.908
PAX6	TBR1	0	0	0	0	0.096	0.064	0	0.898	0.907
PGM5	DMD	0	0	0	0	0.063	0.472	0.72	0.397	0.905
PDE6G	PDE6H	0	0	0	0.973	0.067	0	0.9	0.594	0.904
CHRM4	C5	0	0	0	0	0.063	0	0.9	0	0.902
FBXL7	ASB13	0	0	0	0	0.064	0	0.9	0	0.902
ZNF521	MAF	0	0	0	0	0	0	0.9	0	0.9
HCAR1	C5	0	0	0	0	0	0	0.9	0	0.9
NRN1	ART3	0	0	0	0	0	0	0.9	0	0.9
PAX6	MAF	0	0	0	0	0.062	0.698	0	0.671	0.898
SEMA3A	PLXNC1	0	0	0	0	0	0.188	0	0.877	0.896
FGFR1	RUNX2	0	0	0	0	0	0	0	0.883	0.883
TBR1	FEZF2	0	0	0	0	0.099	0.063	0	0.869	0.88
GAD1	SLC17A6	0	0	0	0	0.118	0	0	0.829	0.843
PDGFC	TGFA	0	0	0	0	0	0	0.8	0.248	0.843
KCNQ5	KCNJ2	0	0	0	0	0	0	0.8	0.243	0.842
RUNX2	BMP4	0	0	0	0	0	0	0	0.837	0.837
SOX9	BMP4	0	0	0	0	0.077	0.089	0	0.82	0.836
RUNX2	LEF1	0	0	0	0	0	0.379	0	0.746	0.836
PDE6G	PDE11A	0	0	0	0	0.062	0.734	0	0.367	0.828
PAX6	FOXG1	0	0	0	0	0.129	0.079	0	0.799	0.825
SV2B	SV2A	0	0	0.426	0.968	0.116	0	0.8	0.835	0.822
FGF9	SOX9	0	0	0	0	0	0	0	0.821	0.822
GRIN2A	CACNG3	0	0	0	0	0.23	0.162	0.72	0.064	0.808
NTRK3	DOK5	0	0	0	0	0.089	0.586	0	0.53	0.807
DOK6	NTRK3	0	0	0	0	0.13	0.586	0	0.497	0.803
GAD1	CALB1	0	0	0	0	0.165	0.129	0	0.75	0.802
EMX2	FOXG1	0	0	0	0	0.089	0.053	0	0.788	0.801
RUNX2	TNFRSF11B	0	0	0	0	0	0	0	0.8	0.8
CACNA1A	CACNA2D1	0	0	0	0	0.106	0.284	0.36	0.567	0.799
FGFR1	FGF14	0	0	0	0	0	0.267	0	0.732	0.795
AMHR2	BMP4	0	0	0	0	0	0.306	0.6	0.296	0.787
ACER2	SMPD3	0	0	0	0	0	0	0.65	0.401	0.781
PPP2R2B	CACNA1A	0	0	0	0	0.201	0	0	0.731	0.776
PAX6	BMP4	0	0	0	0	0	0.185	0	0.733	0.773
LEF1	BMP4	0	0	0	0	0.061	0	0	0.763	0.768
GLI2	BMP4	0	0	0	0	0.085	0.054	0	0.749	0.764
TBR1	FOXG1	0	0	0	0	0.17	0.07	0	0.71	0.756
SHOX2	BMP4	0	0	0	0	0	0	0	0.749	0.749
ST6GAL2	B3GALT1	0	0	0	0	0.085	0	0	0.735	0.747
ZIC4	ZIC1	0	0	0	0.949	0.734	0	0	0.903	0.746
CNGA3	GNAT1	0	0	0	0	0.049	0	0	0.74	0.742
PAX3	ZIC1	0	0	0	0	0.107	0.058	0	0.712	0.736
GABRG2	GABRE	0	0	0	0.902	0	0	0.72	0.518	0.733
KHDRBS2	STXBP5L	0	0	0	0	0.081	0	0	0.718	0.73
CACNA1A	CACNG3	0	0	0	0	0.345	0	0.36	0.397	0.725
PAX6	SOX9	0	0	0	0	0.061	0.064	0	0.709	0.722
WIF1	DKK2	0	0	0	0	0.062	0	0	0.715	0.721
MAF	SOX9	0	0	0	0	0	0.379	0	0.569	0.721
PAX6	CALB1	0	0	0	0	0.062	0	0	0.708	0.715
ENC1	TBR1	0	0	0	0	0	0	0	0.715	0.715
PDGFC	FGFR1	0	0	0	0	0	0	0.6	0.313	0.713
FGFR1	TGFA	0	0	0	0	0	0	0.6	0.312	0.713
CALB1	SLC17A6	0	0	0	0	0.11	0.064	0	0.677	0.707
RUNX2	ZNF521	0	0	0	0	0	0.263	0	0.607	0.698
FGFR1	PLCB1	0	0	0	0	0	0.262	0.6	0.059	0.697
DMD	ACTC1	0	0	0	0	0.061	0.472	0	0.437	0.696
TRIM58	OR2W3	0	0	0	0	0.142	0	0	0.661	0.696
PROM1	ITGA6	0	0	0	0	0.085	0	0	0.68	0.695
RNF43	HECW1	0	0	0	0	0.061	0.387	0	0.504	0.69
CACNA1D	CALB1	0	0	0	0	0.062	0.522	0	0.36	0.688
EYS	IMPG2	0	0	0	0	0.064	0	0	0.677	0.685
ENC1	ZIC1	0	0	0	0	0.077	0.057	0	0.663	0.681
EMX2	TBR1	0	0	0	0	0.144	0.097	0	0.616	0.677
PROM1	BMP4	0	0	0	0	0	0	0	0.673	0.673
PPP2R2B	NKD1	0	0	0	0	0.049	0	0.54	0.313	0.673
ZIC1	BMP4	0	0	0	0	0	0.054	0	0.666	0.672
DISC1	ZNF804A	0	0	0	0	0	0	0	0.672	0.672
ALK	EML1	0	0	0	0	0.061	0.082	0	0.647	0.669
TFAP2A	BMP4	0	0	0	0	0.081	0	0	0.65	0.665
FKBP5	SGK1	0	0	0	0	0	0.189	0	0.604	0.665
ITGA6	TNC	0	0	0	0	0.061	0.161	0.6	0.059	0.663
LONRF2	DIRAS2	0.056	0	0	0	0.17	0.186	0	0.534	0.663
TNFRSF11B	BMP4	0	0	0	0	0.062	0	0	0.653	0.661
GPR56	ARHGAP18	0	0	0	0	0	0	0	0.659	0.659
PLCB1	MTMR7	0	0	0	0	0.062	0	0.65	0	0.657
PPP2R2B	CACNG3	0	0	0	0	0.172	0	0.6	0	0.654
NRL	GNAT1	0	0	0	0	0	0	0	0.654	0.654
TBR1	GAD1	0	0	0	0	0.107	0.05	0	0.624	0.654
GABRG2	GAD1	0	0	0	0	0.232	0	0	0.563	0.65
PAX6	MAB21L2	0	0	0	0	0.061	0	0	0.642	0.65
PSTPIP2	TRIP10	0	0	0	0	0.061	0	0	0.641	0.648
CACNA2D1	RASGRF2	0	0	0	0	0.091	0	0.6	0.109	0.647
RAB34	UNC13C	0	0	0	0	0.061	0	0	0.64	0.647
PDE6H	GNAT1	0	0	0	0	0.062	0.261	0	0.527	0.644
CACNA1D	RASGRF2	0	0	0	0	0.062	0	0.6	0.123	0.642
ADCYAP1	PRL	0	0	0	0	0	0	0	0.641	0.641
GPR126	NPR3	0	0	0	0	0	0	0	0.64	0.64
GPR126	LIN28B	0	0	0	0	0	0	0	0.64	0.64
SLC4A8	FAIM2	0	0	0	0	0.117	0	0	0.608	0.64
PAX3	SOX9	0	0	0	0	0	0.126	0	0.604	0.639
PAX6	ZIC1	0	0	0	0	0.115	0.058	0	0.597	0.635
NRL	PAX6	0	0	0	0	0	0.157	0	0.581	0.632
KCNJ6	CACNA1A	0	0	0	0	0.346	0.084	0	0.43	0.629
ABCC8	PCSK2	0.044	0	0	0	0.214	0.064	0	0.532	0.627
PAX6	GLI2	0	0	0	0	0.045	0.222	0	0.538	0.627
GRIN2A	GAD1	0	0	0	0	0.12	0	0	0.594	0.627
SHOX2	RUNX2	0	0	0	0	0	0	0	0.627	0.627
PAX6	FEZF2	0	0	0	0	0.089	0.058	0	0.599	0.626
FOXG1	FEZF2	0	0	0	0	0.12	0.108	0	0.56	0.624
PPP2R2B	CACNA1D	0	0	0	0	0.062	0	0.6	0.079	0.624
RASGRF2	CACNG3	0	0	0	0	0.098	0	0.6	0	0.623
EDIL3	TMCC3	0	0	0	0	0	0	0	0.623	0.623
VSTM2A	LONRF2	0	0	0	0	0.155	0	0	0.571	0.623
LMO3	TBR1	0	0	0	0	0.172	0.157	0	0.503	0.623
FGFR1	GLI2	0	0	0	0	0.112	0.061	0	0.582	0.622
FGF14	CACNA1A	0	0	0	0	0.158	0	0	0.569	0.622
PPP2R2B	CACNA2D1	0	0	0	0	0.09	0	0.6	0	0.62
CACNA1A	RASGRF2	0	0	0	0	0.062	0	0.6	0.063	0.617
CACNA2D1	KCNJ2	0	0	0	0	0.062	0	0	0.607	0.616
PAX3	BMP4	0	0	0	0	0	0.08	0	0.599	0.615
PAX3	LEF1	0	0	0	0	0.061	0.299	0	0.462	0.615
CNGA3	SLC24A2	0	0	0	0	0.072	0	0	0.602	0.614
ADCYAP1	DISC1	0	0	0	0	0	0	0	0.612	0.612
LONRF2	CPNE9	0	0	0	0	0.096	0	0	0.584	0.608
TBR1	CALB1	0	0	0	0	0.072	0.05	0	0.587	0.604
FOXG1	ZIC1	0	0	0	0	0.172	0.108	0	0.504	0.602
NKD1	LEF1	0	0	0	0	0.093	0.185	0	0.504	0.601
ZIC1	SOX9	0	0	0	0	0.083	0.125	0	0.542	0.601
WIF1	DKK4	0	0	0	0	0	0	0	0.598	0.598
PPP2R2B	FGF14	0	0	0	0	0.118	0.051	0	0.556	0.596
FGF9	BMP4	0	0	0	0	0.063	0.057	0	0.574	0.591
GABRG2	CACNG3	0	0	0	0	0.408	0	0	0.335	0.59
KCNJ6	CALB1	0	0	0	0	0.084	0	0	0.568	0.588
NRL	PDE6G	0	0	0	0	0	0	0	0.588	0.588
CPNE9	DIRAS2	0	0	0	0	0.171	0	0	0.522	0.587
TBR1	SLC17A6	0	0	0	0	0.225	0.05	0	0.483	0.586
SGK1	FOXG1	0	0	0	0	0	0.162	0	0.523	0.584
FGFR1	BMP4	0	0	0	0	0.061	0.078	0	0.556	0.582
LMO3	PAX6	0	0	0	0	0.097	0.15	0	0.498	0.581
PAX6	GAD1	0	0	0	0	0.087	0	0	0.558	0.579
SLITRK1	NPTX1	0	0	0	0	0.134	0	0	0.529	0.575
FAM65B	ACTC1	0	0	0	0	0.051	0	0	0.568	0.573
KCNIP1	SLC24A2	0	0	0	0	0.132	0.067	0	0.515	0.573
PAX6	ELAVL3	0	0	0	0	0.117	0	0	0.535	0.572
DISC1	KCNQ5	0	0	0	0	0	0.305	0	0.409	0.572
GABRG2	CACNA1A	0	0	0	0	0.297	0	0	0.414	0.571
KIF5A	EML1	0	0	0	0	0.08	0.078	0	0.534	0.57
SLITRK1	PTPRK	0	0	0	0	0	0.569	0	0	0.569
WIF1	LEF1	0	0	0	0	0	0	0	0.567	0.567
SV2A	ELAVL3	0	0	0	0	0.171	0	0	0.497	0.565
DCC	SEMA6A	0	0	0	0	0.061	0	0	0.555	0.565
ELAVL3	SLC17A6	0	0	0	0	0.35	0	0	0.356	0.564
GABRE	GABRA5	0	0	0	0.874	0	0	0.54	0.432	0.563
GLI2	SOX9	0	0	0	0	0.1	0.125	0	0.49	0.563
RPH3A	EXPH5	0	0	0	0	0	0	0	0.563	0.563
GABRG2	ANO2	0	0	0	0	0.061	0	0.54	0.066	0.561
PROM1	SOX9	0	0	0	0	0	0	0	0.56	0.56
CACNA1A	CALB1	0	0	0	0	0.115	0.262	0	0.38	0.56
SV2A	SLC17A6	0	0	0	0	0.157	0	0	0.499	0.56
ADCYAP1	SLC17A6	0	0	0	0	0.312	0	0	0.385	0.559
SLC4A8	USH2A	0	0	0	0	0.061	0	0	0.548	0.557
SLC4A8	CA14	0	0	0	0	0.058	0.068	0	0.536	0.557
PAX3	FOXG1	0	0	0	0	0.063	0.072	0	0.532	0.557
DACT1	NKD1	0	0	0	0	0.061	0	0	0.545	0.555
TMEM130	ZNF521	0	0	0	0	0.065	0	0	0.541	0.553
DISC1	GAD1	0	0	0	0	0	0	0	0.553	0.553
TENM2	ZIC1	0	0	0	0	0.112	0	0	0.515	0.551
ANO2	GABRA5	0	0	0	0	0.062	0	0.54	0	0.55
FOXG1	BMP4	0	0	0	0	0	0.051	0	0.544	0.549
AFF3	LONRF2	0	0	0	0	0.069	0	0	0.534	0.548
DACT1	LEF1	0	0	0	0	0	0.379	0	0.3	0.547
FRRS1L	CMTM5	0	0	0	0	0.118	0	0	0.506	0.546
GRIN2A	SLC17A6	0	0	0	0	0.172	0	0	0.473	0.545
GAD1	GABRA5	0	0	0	0	0.119	0	0	0.504	0.545
KCNQ5	KCNH5	0	0	0	0	0.058	0.091	0	0.51	0.544
PDE6G	IMPG2	0	0	0	0	0.06	0	0	0.534	0.543
PRL	TNFRSF11B	0	0	0	0	0	0	0	0.543	0.543
ZIC4	IGLON5	0	0	0	0	0.098	0	0	0.513	0.542
LIN28B	NPR3	0	0	0	0	0	0	0	0.542	0.542
TMEM130	DIRAS2	0	0	0	0	0.313	0	0	0.359	0.541
GABRE	ANO2	0	0	0	0	0	0	0.54	0	0.54
PDE6H	IMPG2	0	0	0	0	0.06	0	0	0.529	0.539
EMX2	FEZF2	0	0	0	0	0.061	0.064	0	0.518	0.539
NRL	PDE6H	0	0	0	0	0	0	0	0.539	0.539
GABRG2	GRIN2A	0	0	0	0	0.247	0	0	0.41	0.537
ZIC4	CLYBL	0	0	0	0	0	0	0	0.537	0.537
TFAP2A	SOX9	0	0	0	0	0.109	0	0	0.501	0.537
FGF14	SOX9	0	0	0	0	0.062	0	0	0.525	0.535
SYT7	SV2A	0	0	0	0	0.091	0.076	0	0.491	0.535
INHBB	AMHR2	0	0	0	0	0	0.306	0	0.356	0.534
PAX3	TFAP2A	0	0	0	0	0.09	0.052	0	0.503	0.534
SLITRK1	GABRA5	0	0	0	0	0.218	0	0	0.428	0.534
IQCA1	PDE11A	0	0	0	0	0	0	0	0.534	0.534
TMEM132C	CACNA2D1	0	0	0	0	0.107	0	0	0.496	0.531
FGF14	BMP4	0	0	0	0	0	0.05	0	0.526	0.531
NRL	CNGA3	0	0	0	0	0	0	0	0.53	0.53
GRIN2A	DISC1	0	0	0	0	0	0	0	0.528	0.528
ELAVL3	NEFM	0	0	0	0	0.35	0	0	0.304	0.528
GPR56	FKBP10	0	0	0	0	0	0	0	0.527	0.527
USH2A	IMPG2	0	0	0	0	0.061	0	0	0.517	0.527
SEMA6A	EPHA8	0	0	0	0	0.065	0.059	0	0.503	0.525
AMHR2	SOX9	0	0	0	0	0	0.05	0	0.521	0.525
SEMA3A	EPHA8	0	0	0	0	0	0.059	0	0.516	0.525
ALK	RUNX2	0	0	0	0	0	0	0	0.523	0.523
TMEM132C	CNTNAP5	0	0	0	0	0.076	0	0	0.504	0.522
PAX6	SLC17A6	0	0	0	0	0.11	0.05	0	0.478	0.521
ZNF804B	AKAP6	0	0	0	0	0.065	0	0	0.508	0.52
SORBS2	PALMD	0	0	0	0	0.083	0	0	0.497	0.519
DCC	ROBO3	0	0	0	0.574	0.064	0.303	0	0.698	0.518
FRRS1L	TMEM130	0	0	0	0	0.313	0	0	0.324	0.516
NRN1	GSG1	0	0	0	0	0	0	0	0.514	0.514
ZIC1	SEMA3A	0	0	0	0	0	0.043	0	0.512	0.513
ROBO3	SEMA6A	0	0	0	0	0.061	0	0	0.502	0.513
GABRG2	KIF5A	0	0	0	0	0.377	0.173	0	0.128	0.512
TNFRSF19	NKD1	0	0	0	0	0.062	0	0	0.501	0.512
RPH3A	MAF	0	0	0	0	0	0	0	0.511	0.511
KIF5A	AFF3	0	0	0	0	0.062	0	0	0.5	0.51
EYS	PDE6G	0	0	0	0	0	0	0	0.51	0.51
CACNA1A	SLC24A2	0	0	0	0	0.475	0	0	0.102	0.509
DKK2	KHDRBS2	0	0	0	0	0	0	0	0.508	0.508
DIRAS2	SV2A	0	0	0	0	0.132	0.072	0	0.436	0.507
GRIN2A	GABRA5	0	0	0	0	0.2	0	0	0.407	0.505
ALK	BMP4	0	0	0	0	0	0.18	0	0.42	0.504
GLI2	KCNQ5	0	0	0	0	0	0.05	0	0.5	0.504
CNTNAP5	CACNA2D1	0	0	0	0	0	0	0	0.503	0.503
FKBP5	MAOA	0	0	0	0	0.055	0	0	0.495	0.502
KIF5A	NEFM	0	0	0	0	0.386	0	0	0.218	0.499
TRPM3	UNC13C	0	0	0	0	0.143	0	0	0.44	0.499
DKK2	LEF1	0	0	0	0	0	0	0	0.497	0.497
KCNB2	KCNH5	0	0	0	0	0.096	0.091	0	0.435	0.495
CNTN6	CNTNAP5	0	0	0	0	0.154	0.132	0	0.367	0.495
PAX6	TFAP2A	0	0	0	0	0.064	0.052	0	0.477	0.495
ALK	LIN28B	0	0	0	0	0.061	0.085	0	0.459	0.494
GLI2	PAX3	0	0	0	0	0.062	0.058	0	0.473	0.493
TBR1	ELAVL3	0	0	0	0	0.343	0	0	0.256	0.491
HCAR1	SLC16A4	0	0	0	0	0	0	0	0.492	0.491
NRL	IMPG2	0	0	0	0	0	0	0	0.491	0.491
DCC	SEMA3A	0	0	0	0	0.057	0	0	0.482	0.49
SOX9	KCNJ2	0	0	0	0	0	0	0	0.489	0.489
TMEM130	ATCAY	0	0	0	0	0.259	0	0	0.337	0.488
EYS	CNGA3	0	0	0	0	0	0	0	0.488	0.488
EML1	RTN1	0	0	0	0	0	0.127	0	0.437	0.487
LMO3	FOXG1	0	0	0	0	0.119	0.124	0	0.387	0.486
ADAMTSL1	ADAM12	0	0	0	0	0.125	0.157	0	0.36	0.486
ADCYAP1	CALB1	0	0	0	0	0.063	0	0	0.473	0.485
LEF1	DKK4	0	0	0	0	0	0	0	0.484	0.484
TFAP2A	ZIC1	0	0	0	0	0.062	0	0	0.472	0.483
TBR1	ZIC1	0	0	0	0	0.098	0.063	0	0.437	0.483
GLI2	ZIC1	0	0	0	0.738	0	0.423	0	0.404	0.48
SV2B	RPH3A	0	0	0	0	0.293	0	0	0.293	0.479
CACNA1A	CACNA1D	0	0	0	0.857	0.125	0	0.36	0.77	0.479
ELAVL3	CALB1	0	0	0	0	0.126	0	0	0.428	0.479
GLI2	RUNX2	0	0	0	0	0	0.054	0	0.471	0.478
GRIN2A	CACNA1A	0	0	0	0	0.201	0.069	0	0.355	0.478
RUNX2	PRL	0	0	0	0	0	0	0	0.477	0.477
EYS	USH2A	0	0	0	0.538	0.061	0.181	0	0.762	0.476
RAB34	DIRAS2	0	0	0.351	0	0.062	0.185	0	0.068	0.475
ATCAY	CACNA1A	0	0	0	0	0.351	0	0	0.223	0.475
KCNQ5	CALB1	0	0	0	0	0.061	0.308	0	0.255	0.474
GABRG2	SLC17A6	0	0	0	0	0.351	0	0	0.223	0.474
GAD1	FOXG1	0	0	0	0	0.126	0	0	0.423	0.474
WIF1	NKD1	0	0	0	0	0	0	0	0.473	0.473
PROM1	GLI2	0	0	0	0	0.061	0	0	0.461	0.473
NRL	EYS	0	0	0	0	0	0	0	0.473	0.473
NRL	USH2A	0	0	0	0	0	0	0	0.473	0.473
FOXG1	CALB1	0	0	0	0	0.062	0.172	0	0.374	0.471
KCNJ6	ABCC8	0	0	0	0	0.095	0.064	0	0.424	0.47
SLC22A23	ZNF521	0	0	0	0	0	0	0	0.47	0.47
RNF43	PTPRK	0	0	0	0	0.061	0	0	0.457	0.469
DSP	DMD	0	0	0	0	0.063	0	0	0.457	0.469
GRIN2A	MAPK10	0	0	0	0	0.167	0.086	0	0.358	0.468
CKB	TNFRSF11B	0	0	0	0	0	0	0	0.467	0.467
ROBO3	SEMA3A	0	0	0	0	0.051	0	0	0.461	0.466
PAX3	MAB21L2	0	0	0	0	0.052	0	0	0.458	0.464
KIF5A	SV2A	0	0	0	0	0.298	0.058	0	0.254	0.464
PAX6	PCSK2	0	0	0	0	0.107	0.081	0	0.399	0.464
SLC24A2	PDE6H	0	0	0	0	0	0	0	0.463	0.463
ITGA6	SOX9	0	0	0	0	0.065	0	0	0.448	0.462
TGFA	NKD1	0	0	0	0	0	0	0	0.462	0.462
ELAVL3	GAD1	0	0	0	0	0.18	0	0	0.369	0.461
FGFR1	SOX9	0	0	0	0	0.066	0	0	0.446	0.46
PROM1	EYS	0	0	0	0	0.061	0.085	0	0.421	0.459
BOC	GLI2	0	0	0	0	0.112	0	0	0.416	0.459
ENC1	TMEM51	0	0	0	0	0	0	0	0.459	0.459
TMEM98	C12orf55	0	0	0	0	0	0	0	0.458	0.458
GLI2	LEF1	0	0	0	0	0	0.13	0	0.402	0.457
PAX6	FGFR1	0	0	0	0	0	0.05	0	0.452	0.457
PAX6	ABCC8	0	0	0	0	0.123	0	0	0.406	0.457
ENC1	SYT7	0	0	0	0	0.085	0	0	0.431	0.457
KIF5A	ELAVL3	0	0	0	0	0.36	0	0	0.183	0.455
FRRS1L	GSG1	0	0	0	0	0.063	0	0	0.443	0.455
ITGA6	ITGA9	0	0	0	0.681	0	0	0.36	0.476	0.452
PAX3	DMD	0	0	0	0	0	0	0	0.452	0.452
PAX6	LEF1	0	0	0	0	0	0.177	0	0.358	0.449
PTPRK	NTRK3	0	0	0	0	0.062	0.16	0	0.355	0.448
ZIC4	FOXG1	0	0	0	0	0.162	0.108	0	0.32	0.448
TRANK1	ZNF804A	0	0	0	0	0.084	0	0	0.421	0.447
GRIN2A	CALB1	0	0	0	0	0.107	0.066	0	0.389	0.446
CACNA1A	UNC13C	0	0	0	0	0.378	0	0	0.144	0.445
PDE6G	USH2A	0	0	0	0	0	0	0	0.445	0.445
PROM1	FGF9	0	0	0	0	0	0	0	0.445	0.445
STXBP5L	UNC13C	0	0	0	0	0.192	0	0	0.339	0.444
MAPK10	FOXG1	0	0	0	0	0.118	0.09	0	0.363	0.444
FGF14	CALB1	0	0	0	0	0.082	0.262	0	0.244	0.443
RTN1	NEFM	0	0	0	0	0.324	0	0	0.208	0.442
ZFHX4	LEF1	0	0	0	0	0.108	0	0	0.398	0.44
SLC16A4	NALCN	0	0	0	0	0.049	0	0	0.435	0.44
EMX2	LMO3	0	0	0	0	0.108	0.078	0	0.373	0.44
PROM1	PAX6	0	0	0	0	0	0	0	0.44	0.44
DSP	ACTC1	0	0	0	0	0.061	0.262	0	0.256	0.439
TENM2	ITGA6	0	0	0	0	0.061	0.312	0	0.201	0.438
FRRS1L	DIRAS2	0	0	0	0	0.316	0	0	0.212	0.438
ZIC4	GAD1	0	0	0	0	0.149	0.052	0	0.358	0.437
GABRG2	SLITRK1	0	0	0	0	0.383	0	0	0.124	0.436
FGF14	NALCN	0	0	0	0	0.171	0	0	0.348	0.436
KCNB2	KCNJ2	0	0	0	0	0.05	0	0	0.43	0.436
SLC1A7	SLC16A4	0	0	0	0	0	0	0	0.435	0.435
ASTN1	NPR3	0	0	0	0	0	0	0	0.434	0.434
CACNA2D1	FKBP10	0	0	0	0	0.077	0	0	0.412	0.434
FSTL5	STXBP5L	0	0	0	0	0.231	0	0	0.292	0.432
CACNA1A	ELAVL3	0	0	0	0	0.353	0	0	0.156	0.431
TMEM130	VSTM2A	0	0	0	0	0.231	0	0	0.29	0.431
EYS	MAK	0	0	0	0	0.063	0	0	0.418	0.431
GAD1	ZIC1	0	0	0	0	0.146	0.052	0	0.352	0.43
FRRS1L	VSTM2A	0	0	0	0	0.232	0	0	0.289	0.43
EMX2	FGF9	0	0	0	0	0	0.084	0	0.403	0.429
MAPK10	GAD1	0	0	0	0	0.129	0.366	0	0.049	0.429
CNTN6	ELAVL3	0	0	0	0	0.196	0.125	0	0.253	0.429
RUNX2	EDIL3	0	0	0	0	0	0	0	0.429	0.429
NAALAD2	UBASH3B	0.053	0	0	0	0	0	0	0.421	0.428
GPR56	EMX2	0	0	0	0	0	0	0	0.427	0.427
PLCB1	PLD2	0	0	0	0	0.052	0.172	0	0.329	0.427
PIWIL2	FKBP10	0	0	0	0	0	0	0	0.427	0.426
ADAM12	PAPPA2	0	0	0	0	0	0	0	0.426	0.426
SLC16A4	CA14	0	0	0	0	0	0	0	0.425	0.425
TBC1D30	PPP2R2B	0	0	0	0	0.055	0.358	0	0.129	0.425
SLITRK1	NTRK3	0	0	0	0	0.159	0	0	0.343	0.424
PDE11A	PDE6H	0	0	0	0	0.05	0.34	0	0.155	0.424
KCNB2	MAMDC2	0	0	0	0	0	0	0	0.423	0.423
B3GALT1	ZNF804B	0	0	0	0	0	0	0	0.423	0.422
CDH12	NME5	0	0	0	0	0.061	0	0	0.41	0.422
ZNF521	BMP4	0	0	0	0	0	0.054	0	0.414	0.421
ELAVL3	ZIC1	0	0	0	0	0.287	0	0	0.221	0.421
SLC17A6	NEFM	0	0	0	0	0.349	0	0	0.145	0.42
COLGALT2	CMTM5	0	0	0	0	0.111	0	0	0.375	0.42
RPH3A	SV2A	0	0	0	0	0.122	0	0	0.365	0.419
TENM2	MCF2L2	0	0	0	0	0	0	0	0.418	0.418
CNTN6	ZNF804B	0	0	0	0	0.108	0	0	0.371	0.416
GAD1	FEZF2	0	0	0	0	0.108	0.052	0	0.364	0.416
PLXNC1	EPHA8	0	0	0	0	0.113	0.085	0	0.337	0.415
NAV2	NALCN	0	0	0	0	0.081	0	0	0.39	0.415
CNTNAP5	PDE11A	0	0	0	0	0.061	0	0	0.403	0.415
ADAM12	DMD	0	0	0	0	0	0	0	0.415	0.414
FKBP5	FKBP10	0	0	0.409	0.598	0	0	0	0.703	0.414
GPR56	CACNA2D1	0	0	0	0	0	0	0	0.415	0.414
GRIN2A	RPH3A	0	0	0	0	0.16	0	0	0.329	0.413
FOXG1	SLC17A6	0	0	0	0	0.13	0.05	0	0.347	0.413
SLC1A7	SGK1	0	0	0	0	0	0	0	0.412	0.412
CNGA3	PDE6G	0	0	0	0	0	0	0	0.412	0.412
FRRS1L	LONRF2	0	0	0	0	0.153	0.051	0	0.326	0.412
GABRG2	FGF14	0	0	0	0	0.214	0	0	0.281	0.411
FBXL7	ZNF521	0	0	0	0	0.159	0.058	0	0.316	0.411
PAX3	ALK	0	0	0	0	0.061	0.087	0	0.369	0.411
SLITRK1	ASTN1	0	0	0	0	0.348	0	0	0.134	0.411
MAB21L2	BMP4	0	0	0	0	0	0	0	0.41	0.41
MAK	USH2A	0	0	0	0	0.062	0	0	0.396	0.409
FKBP5	GAD1	0	0	0	0	0.055	0	0	0.4	0.408
GABRG2	SV2B	0	0	0	0	0.327	0	0	0.156	0.408
ABCC8	KCNJ2	0	0	0	0	0	0.064	0	0.392	0.407
EYS	GRIN2A	0	0	0	0	0.062	0.084	0	0.364	0.406
TMEM98	SLC24A2	0	0	0	0	0	0	0	0.406	0.406
NTRK3	CALB1	0	0	0	0	0.095	0.125	0	0.311	0.406
PAX6	ITGA6	0	0	0	0	0.061	0	0	0.394	0.406
FGF9	RUNX2	0	0	0	0	0	0	0	0.406	0.406
ZIC4	TENM3	0	0	0	0	0.07	0	0	0.387	0.405
EDIL3	RASGRF2	0	0	0	0	0.114	0	0	0.355	0.405
SV2A	CALB1	0	0	0	0	0.093	0	0	0.37	0.405
PAX6	FGF14	0	0	0	0	0.097	0.053	0	0.359	0.404
RCBTB2	ACER2	0	0	0	0	0	0	0	0.404	0.404
KCNH5	CALB1	0	0	0	0	0.082	0.358	0	0.068	0.403
ZIC4	SLITRK6	0	0	0	0	0.057	0	0	0.393	0.403
EMX2	SOX9	0	0	0	0	0.061	0.057	0	0.38	0.403
FAIM2	RTN1	0	0	0	0	0.359	0	0	0.104	0.402
FEZF2	SEMA3A	0	0	0	0	0	0.043	0	0.399	0.4
FGFR1	GAD1	0	0	0	0	0.062	0.332	0	0.12	0.4
ARHGAP18	TMEM244	0	0	0	0	0	0	0	0.401	0.4
DACT1	WIF1	0	0	0	0	0.065	0	0	0.385	0.4
ARPP21	CHRM4	0	0	0	0	0.086	0	0	0.37	0.4
PPI enrichment p-value< 1.0e-16
Number of nodes=254, number of edges=400, average node degree=3.15, average local clustering coefficient=0.415

## Sheet: Supplementary table 5
Supplementary table 5. Candidate of important nodes in the PPI network predicted using CytoHubba with different topological algorithms
node_name	MCC	DMNC	MNC	Degree	EPC	BottleNeck	EcCentricity	Closeness	Radiality	Betweenness	Stress	ClusteringCoefficient
PAX6	467	0.30706	20	23	47.928	24	0.12885	80.6429	9.25126	5243.27	21662	0.20158
BMP4	270	0.29483	19	21	46.939	20	0.15033	77.6833	9.1724	4955.13	16434	0.20952
GAD1	345	0.33049	15	16	45.709	17	0.12885	73.9857	9.05904	3056.02	13754	0.275
SOX9	235	0.34051	15	16	45.586	10	0.12885	72.9429	9.04918	1986.25	8424	0.28333
CALB1	269	0.31933	13	16	44.791	22	0.15033	74.7667	9.14776	4013.96	15414	0.21667
FOXG1	207	0.35765	13	14	44.789	14	0.12885	72.4762	9.0689	2184.23	9258	0.30769
ZIC1	166	0.39514	12	14	44.707	14	0.12885	73.0357	9.06397	3670.05	14596	0.2967
CACNA1A	77	0.33936	11	14	40.813	25	0.15033	71.6	9.02947	4463.6	12884	0.21978
RUNX2	65	0.27149	11	12	38.831	7	0.12885	65.9119	8.72881	1618.27	5842	0.24242
TBR1	332	0.45814	11	11	42.589	1	0.12885	68.1024	8.91118	527.682	2734	0.49091
SLC17A6	262	0.3733	11	11	43.011	1	0.12885	69.8429	8.99989	933.532	5290	0.4
GRIN2A	38	0.29929	10	12	40.874	3	0.12885	67.769	8.8471	1691.13	6464	0.22727
GABRG2	30	0.25938	10	12	39.017	6	0.12885	67.6429	8.8816	2279.34	8918	0.19697
ELAVL3	159	0.3791	10	11	42.409	22	0.12885	71.6262	9.08861	3346.77	10614	0.34545
GLI2	140	0.52506	9	11	42.621	4	0.12885	68.3691	8.8816	861.711	3770	0.4
PAX3	65	0.358	9	10	40.536	9	0.12885	66.9524	8.82739	2708.46	9476	0.33333
FGFR1	101	0.46652	8	11	41.708	5	0.12885	68.7429	8.92596	1809.26	6644	0.30909
FGF14	33	0.29157	8	9	39.684	17	0.12885	70.6095	9.05411	3761.29	12652	0.27778
PDE6G	62	0.43736	8	8	19.125	1	0.10022	52.3254	8.01414	390.787	1746	0.53571
NRL	61	0.51223	7	8	23.337	9	0.11275	60.8202	8.56123	1510.32	6268	0.5
CACNG3	60	0.47564	7	7	32.135	1	0.12885	59.3143	8.49223	233.792	1018	0.61905
PDE6H	34	0.36588	7	7	18.095	1	0.11275	51.6905	8.01907	319.626	1526	0.47619
EYS	34	0.42794	6	8	24.149	2	0.11275	59.1631	8.47745	1128.95	4248	0.32143
PROM1	37	0.47549	6	7	35.648	2	0.12885	63.419	8.73867	494.516	2222	0.47619
CACNA1D	50	0.47549	6	6	29.515	1	0.12885	59.1857	8.54645	127.228	778	0.66667
FGF9	32	0.42794	6	6	33.914	1	0.12885	59.8214	8.56123	117.387	702	0.6
CNGA3	32	0.42794	6	6	17.813	1	0.11275	51.6	8.02893	127.725	586	0.6
GABRA5	14	0.33284	6	6	27.063	5	0.11275	58.8036	8.51688	391.499	1906	0.46667
LEF1	31	0.45378	5	11	35.847	9	0.12885	65.6857	8.75346	2344.32	7836	0.23636
CACNA2D1	53	0.58344	5	10	29.96	10	0.12885	60.7191	8.52673	1692.61	4950	0.24444
PPP2R2B	28	0.45378	5	7	28.918	3	0.12885	60.0595	8.59081	929.047	2988	0.33333
TFAP2A	49	0.58344	5	6	35.058	2	0.12885	62.9024	8.73867	148.187	698	0.6
FEZF2	31	0.51861	5	6	34.214	1	0.11275	61.8036	8.65488	478.699	3280	0.53333
RASGRF2	31	0.51861	5	6	28.933	3	0.12885	57.9643	8.46759	378.966	1170	0.53333
USH2A	27	0.45378	5	6	16.05	3	0.10022	50.4349	7.95007	562.059	1898	0.46667
IMPG2	30	0.51861	5	5	17.056	1	0.10022	49.5778	7.91557	14.2841	78	0.8
WIF1	12	0.38896	5	5	17.241	1	0.11275	50.5405	8.00921	39.1135	122	0.6
SV2A	12	0.37893	4	8	31.234	14	0.12885	60.7929	8.61052	2005.78	8310	0.17857
EMX2	15	0.47366	4	7	34.242	6	0.11275	59.9036	8.55138	694.432	3052	0.28571
FRRS1L	10	0.37893	4	6	8.264	7	0.10022	45.7754	7.52127	1837.45	5488	0.26667
DIRAS2	8	0.2842	4	6	13.304	9	0.11275	51.1321	7.9895	1636.63	6606	0.2
GNAT1	25	0.56839	4	5	15.804	1	0.10022	48.729	7.83178	124.285	320	0.6
LONRF2	7	0.2842	4	5	8.254	1	0.10022	42.6564	7.2354	128.39	472	0.3
LMO3	12	0.47366	4	4	29.091	1	0.11275	57.8536	8.51195	12.9018	114	0.83333
ZIC4	10	0.46346	3	7	25.668	5	0.11275	58.7869	8.48237	1444	5460	0.14286
ITGA6	9	0.46346	3	6	27.077	5	0.11275	59.6702	8.55631	738.096	2956	0.26667
NKD1	9	0.46346	3	6	19.407	3	0.11275	54.5393	8.24579	627.406	1858	0.2
KIF5A	7	0.30898	3	6	25.756	4	0.12885	57.9429	8.51195	810.146	2840	0.13333
TMEM130	6	0.30898	3	5	12.539	11	0.11275	51.9631	8.13243	1778.03	4892	0.2
ALK	6	0.30898	3	5	24.502	5	0.12885	57.5714	8.46266	1265.62	3924	0.2
DKK2	7	0.46346	3	4	13.768	2	0.11275	48.9929	7.92543	375.619	1072	0.5
NEFM	5	0.30898	3	4	22.032	3	0.11275	54.2702	8.35423	442.397	1524	0.33333
TNFRSF11B	5	0.30898	3	4	20.518	2	0.12885	55.0881	8.3493	418.074	1262	0.33333
GABRE	6	0.46346	3	3	16.235	1	0.11275	48.7583	7.99443	0	0	1
DACT1	6	0.46346	3	3	15.926	1	0.11275	49.2405	7.98457	0	0	1
ANO2	6	0.46346	3	3	15.632	1	0.11275	48.7583	7.99443	0	0	1
DKK4	6	0.46346	3	3	13.988	1	0.11275	48.0595	7.89585	0	0	1
PLXNC1	4	0.30898	3	3	7.406	1	0.10022	41.9829	7.36355	89.5	1136	0.66667
ROBO3	4	0.30898	3	3	7.378	2	0.10022	41.9829	7.36355	89.5	1136	0.66667
EPHA8	4	0.30898	3	3	6.803	1	0.10022	41.9829	7.36355	89.5	1136	0.66667
DCC	4	0.30898	3	3	6.711	1	0.10022	41.9829	7.36355	89.5	1136	0.66667
VSTM2A	4	0.30898	3	3	6.323	1	0.10022	41.9373	7.31426	28.7039	204	0.66667
MAB21L2	4	0.30898	3	3	26.339	1	0.12885	58.419	8.58095	16.0736	180	0.66667
MAPK10	4	0.30898	3	3	23.41	1	0.11275	56.7536	8.51195	12.2355	126	0.66667
SEMA3A	6	0.30779	2	6	17.869	6	0.11275	54.331	8.24579	1785.07	9086	0.13333
ZNF521	6	0.30779	2	6	25.211	14	0.12885	58.9119	8.51688	2424.33	6816	0.06667
SLITRK1	6	0.30779	2	6	17.506	4	0.11275	52.7417	8.12258	1221.71	4586	0.13333
DMD	5	0.30779	2	5	12.464	8	0.11275	51.1095	8.00921	2053.4	6582	0.1
NTRK3	5	0.30779	2	5	14.83	8	0.12885	55.5524	8.37394	1544.13	4736	0.1
SLC24A2	5	0.30779	2	5	16.01	5	0.12885	54.6476	8.2803	1375.31	3614	0.1
DISC1	5	0.30779	2	5	25.645	3	0.11275	57.3048	8.43309	774.305	2966	0.1
RPH3A	5	0.30779	2	5	21.147	3	0.11275	56.0107	8.40844	490.595	1632	0.1
KCNQ5	5	0.30779	2	5	26.141	1	0.12885	59.819	8.64995	261.845	1124	0.1
GPR56	4	0.30779	2	4	16.965	5	0.11275	51.8809	8.11272	843.897	3018	0.16667
PDE11A	4	0.30779	2	4	11.502	2	0.10022	45.179	7.51634	500.896	1862	0.16667
PRL	4	0.30779	2	4	16.548	2	0.11275	51.706	8.11765	436.684	1804	0.16667
MAF	4	0.30779	2	4	25.5	3	0.12885	60.3595	8.66967	457.031	1750	0.16667
FKBP10	4	0.30779	2	4	13.821	2	0.11275	49.5107	7.93528	468.055	1672	0.16667
ADCYAP1	4	0.30779	2	4	23.343	3	0.12885	55.6524	8.4183	338.242	1524	0.16667
ENC1	4	0.30779	2	4	19.419	2	0.11275	54.6702	8.3493	499.205	1504	0.16667
CNTNAP5	4	0.30779	2	4	12.858	4	0.11275	49.9619	7.96978	503.908	1326	0.16667
ABCC8	4	0.30779	2	4	19.998	2	0.11275	57.6536	8.51688	88.2695	410	0.16667
TGFA	4	0.30779	2	4	20.978	1	0.11275	53.3893	8.24579	75.8986	302	0.16667
SEMA6A	4	0.30779	2	4	5.9	1	0.0902	35.471	6.49116	4	8	0.33333
HCAR1	3	0.30779	2	3	2.909	4	0.0902	36.7179	6.7031	1080	2742	0.33333
PTPRK	3	0.30779	2	3	7.534	3	0.11275	44.4643	7.57056	724	2680	0.33333
ITGA9	3	0.30779	2	3	11.276	1	0.11275	47.4262	7.85149	445.266	2000	0.33333
LIN28B	3	0.30779	2	3	7.683	3	0.11275	44.956	7.6642	583.069	1758	0.33333
AMHR2	3	0.30779	2	3	20.584	2	0.12885	54.7881	8.36901	364	1090	0.33333
ACTC1	3	0.30779	2	3	4.242	2	0.10022	40.1127	7.12697	364	1090	0.33333
CHRM4	3	0.30779	2	3	2.15	2	0.082	31.2096	5.82085	364	918	0.33333
TNC	3	0.30779	2	3	17.201	1	0.12885	54.3548	8.33451	192.282	718	0.33333
KCNH5	3	0.30779	2	3	17.192	1	0.12885	53.4524	8.30987	290.213	676	0.33333
NPR3	3	0.30779	2	3	3.49	1	0.10022	39.25	7.07275	120.837	338	0.33333
SV2B	3	0.30779	2	3	17.205	1	0.12885	52.1381	8.21622	49.0843	244	0.33333
KCNJ6	3	0.30779	2	3	20.422	1	0.12885	56.0024	8.4528	51.4491	150	0.33333
SHOX2	2	0.30779	2	2	18.48	1	0.12885	53.4214	8.30987	0	0	1
PDGFC	2	0.30779	2	2	16.127	1	0.11275	49.4726	8.0585	0	0	1
PCSK2	2	0.30779	2	2	15.694	1	0.11275	54.7036	8.38873	0	0	1
MAK	2	0.30779	2	2	9.67	1	0.10022	44.4218	7.63463	0	0	1
TMEM132C	2	0.30779	2	2	9.166	1	0.11275	45.5381	7.70363	0	0	1
CPNE9	2	0.30779	2	2	5.763	1	0.10022	39.6349	7.10725	0	0	1
GPR126	2	0.30779	2	2	3.566	1	0.10022	36.8667	6.85096	0	0	1
DSP	2	0.30779	2	2	3.357	1	0.10022	39.6127	7.12204	0	0	1
C5	2	0.30779	2	2	1.89	1	0.082	30.7096	5.81592	0	0	1
HIST1H4D	2	0.30779	2	2	1.558	1	0.01471	2	0.02941	0	0	1
HIST1H3J	2	0.30779	2	2	1.532	1	0.01471	2	0.02941	0	0	1
HIST1H4L	2	0.30779	2	2	1.528	1	0.01471	2	0.02941	0	0	1
KCNJ2	5	0	1	5	23.238	3	0.11275	58.7202	8.53166	717.68	2166	0
SLC16A4	4	0	1	4	6.02	6	0.10022	44.5742	7.57056	1751.42	4522	0
UNC13C	4	0	1	4	11.875	6	0.12885	53.1714	8.25565	1302.48	2972	0
ADAM12	4	0	1	4	6.419	3	0.10022	42.2448	7.25019	746.667	2870	0
PLCB1	4	0	1	4	13.868	3	0.11275	52.1726	8.16693	812.314	2458	0
FKBP5	4	0	1	4	16.575	4	0.11275	54.8774	8.3493	713.538	2454	0
NALCN	3	0	1	3	11.113	8	0.11275	52.3702	8.26058	2005.62	5316	0
CNTN6	3	0	1	3	13.067	8	0.11275	53.3702	8.3148	1638.03	3686	0
ZNF804B	3	0	1	3	4.788	4	0.10022	42.3242	7.44734	1084	2278	0
SGK1	3	0	1	3	15.217	2	0.11275	53.2536	8.30987	597.056	1858	0
EDIL3	3	0	1	3	15.094	3	0.11275	52.9393	8.25565	455.517	1346	0
RTN1	3	0	1	3	8.689	2	0.11275	45.1059	7.73813	348.209	1170	0
TENM2	3	0	1	3	16.462	2	0.11275	52.6476	8.23101	376.331	1084	0
STXBP5L	3	0	1	3	4.432	3	0.11275	42.9131	7.4917	500.717	1018	0
EML1	3	0	1	3	11.632	1	0.11275	49.9798	8.093	317.969	980	0
KCNB2	3	0	1	3	9.454	2	0.11275	46.7476	7.84164	370.1	894	0
SLC4A8	3	0	1	3	6.104	1	0.0902	41.5436	7.22062	306.459	784	0
GSG1	2	0	1	2	2.632	3	0.0902	36.3603	6.64395	724	2084	0
ATCAY	2	0	1	2	12.014	3	0.12885	52.6381	8.29015	596.351	1504	0
RNF43	2	0	1	2	2.882	2	0.10022	35.8198	6.68338	364	1342	0
ZNF804A	2	0	1	2	7.791	2	0.10022	43.3103	7.54591	364	1320	0
ARHGAP18	2	0	1	2	4.669	2	0.10022	40.2258	7.22554	364	1184	0
CMTM5	2	0	1	2	3.464	2	0.0902	36.1103	6.63409	364	1044	0
NRN1	2	0	1	2	1.863	2	0.082	30.5492	5.75678	364	1044	0
FBXL7	2	0	1	2	6.537	2	0.11275	44.1131	7.6297	364	1000	0
TMEM98	2	0	1	2	5.284	2	0.11275	41.7488	7.39312	364	914	0
SLC1A7	2	0	1	2	5.439	1	0.10022	43.029	7.53605	268.287	802	0
AFF3	2	0	1	2	8.899	2	0.11275	45.3655	7.73813	172.08	792	0
B3GALT1	2	0	1	2	2.03	2	0.0902	34.5964	6.56016	364	762	0
ASTN1	2	0	1	2	5.281	2	0.10022	41.4016	7.31426	209.087	610	0
KHDRBS2	2	0	1	2	5.166	1	0.10022	40.8266	7.29455	145.639	348	0
RAB34	2	0	1	2	6.337	1	0.11275	44.2119	7.58534	135.652	316	0
FAIM2	2	0	1	2	4.549	1	0.10022	38.6897	7.06782	85.4317	294	0
CA14	2	0	1	2	3.696	1	0.0902	37.9238	6.87067	156.598	270	0
SYT7	2	0	1	2	10.566	1	0.11275	47.8607	7.955	64.4667	84	0
ACER2	2	0	1	2	1.467	3	0.01471	2	0.05147	2	2	0
BAMBI	1	0	1	1	11.955	1	0.12885	52.2548	8.27537	0	0	0
BOC	1	0	1	1	11.067	1	0.11275	48.1333	7.98457	0	0	0
ZFHX4	1	0	1	1	8.7	1	0.11275	46.6429	7.85642	0	0	0
SLC22A23	1	0	1	1	7.444	1	0.11275	43.4464	7.61984	0	0	0
IGLON5	1	0	1	1	7.122	1	0.10022	43.2552	7.58534	0	0	0
TENM3	1	0	1	1	7.03	1	0.10022	43.2552	7.58534	0	0	0
CLYBL	1	0	1	1	6.968	1	0.10022	43.2552	7.58534	0	0	0
TBC1D30	1	0	1	1	6.651	1	0.11275	44.0607	7.69377	0	0	0
EXPH5	1	0	1	1	6.617	1	0.10022	41.9897	7.51141	0	0	0
SLITRK6	1	0	1	1	6.181	1	0.10022	43.2552	7.58534	0	0	0
INHBB	1	0	1	1	6.074	1	0.11275	41.4714	7.47198	0	0	0
CKB	1	0	1	1	5.572	1	0.11275	41.4976	7.45227	0	0	0
TNFRSF19	1	0	1	1	5.412	1	0.10022	40.9004	7.34876	0	0	0
NPTX1	1	0	1	1	4.928	1	0.10022	39.8194	7.22554	0	0	0
MAOA	1	0	1	1	4.865	1	0.10022	41.4183	7.45227	0	0	0
MCF2L2	1	0	1	1	4.75	1	0.10022	40.2425	7.33398	0	0	0
KCNIP1	1	0	1	1	4.739	1	0.11275	41.0821	7.38326	0	0	0
TMEM51	1	0	1	1	4.669	1	0.10022	41.3218	7.45227	0	0	0
PRLR	1	0	1	1	4.62	1	0.10022	39.498	7.22062	0	0	0
PIWIL2	1	0	1	1	4.307	1	0.10022	38.1194	7.03825	0	0	0
TMCC3	1	0	1	1	4.263	1	0.10022	40.4242	7.35862	0	0	0
PGM5	1	0	1	1	4.181	1	0.10022	38.946	7.11218	0	0	0
DOK5	1	0	1	1	4.163	1	0.11275	41.681	7.47691	0	0	0
MTMR7	1	0	1	1	4.162	1	0.10022	39.8123	7.2699	0	0	0
DOK6	1	0	1	1	4.024	1	0.11275	41.681	7.47691	0	0	0
PLD2	1	0	1	1	3.566	1	0.10022	39.8123	7.2699	0	0	0
NAV2	1	0	1	1	3.304	1	0.10022	40.1837	7.36355	0	0	0
IQCA1	1	0	1	1	3.187	1	0.0902	35.3448	6.61931	0	0	0
MAMDC2	1	0	1	1	3.052	1	0.10022	36.7377	6.94461	0	0	0
TRPM3	1	0	1	1	3.008	1	0.11275	40.431	7.35862	0	0	0
TRANK1	1	0	1	1	2.613	1	0.0902	34.6932	6.64888	0	0	0
ASB13	1	0	1	1	2.437	1	0.10022	35.1988	6.73267	0	0	0
C12orf55	1	0	1	1	2.371	1	0.10022	33.6591	6.49609	0	0	0
ADAMTSL1	1	0	1	1	2.306	1	0.0902	33.5075	6.35316	0	0	0
PAPPA2	1	0	1	1	2.236	1	0.0902	33.5075	6.35316	0	0	0
FSTL5	1	0	1	1	2.057	1	0.10022	34.2742	6.59466	0	0	0
FAM65B	1	0	1	1	1.875	1	0.0902	32.3746	6.22994	0	0	0
TMEM244	1	0	1	1	1.83	1	0.0902	32.6615	6.32851	0	0	0
AKAP6	1	0	1	1	1.767	1	0.0902	33.9298	6.55031	0	0	0
COLGALT2	1	0	1	1	1.678	1	0.082	29.7492	5.73706	0	0	0
HECW1	1	0	1	1	1.571	1	0.0902	29.6798	5.78635	0	0	0
ARPP21	1	0	1	1	1.463	1	0.07516	26.1866	4.92382	0	0	0
ST6GAL2	1	0	1	1	1.389	1	0.082	28.8798	5.66313	0	0	0
ART3	1	0	1	1	1.382	1	0.07516	25.9009	4.85974	0	0	0
SMPD3	1	0	1	1	1.286	1	0.00735	1.5	0.04412	0	0	0
RCBTB2	1	0	1	1	1.277	1	0.00735	1.5	0.04412	0	0	0
OR2W3	1	0	1	1	1.265	1	0.0098	1	0.02941	0	0	0
TRIM58	1	0	1	1	1.265	1	0.0098	1	0.02941	0	0	0
PALMD	1	0	1	1	1.243	1	0.0098	1	0.02941	0	0	0
SORBS2	1	0	1	1	1.243	1	0.0098	1	0.02941	0	0	0
UBASH3B	1	0	1	1	1.232	1	0.0098	1	0.02941	0	0	0
NAALAD2	1	0	1	1	1.232	1	0.0098	1	0.02941	0	0	0
NME5	1	0	1	1	1.224	1	0.0098	1	0.02941	0	0	0
CDH12	1	0	1	1	1.224	1	0.0098	1	0.02941	0	0	0
PPFIA4	1	0	1	1	1.214	1	0.0098	1	0.02941	0	0	0
LIN7A	1	0	1	1	1.214	1	0.0098	1	0.02941	0	0	0
TRIP10	1	0	1	1	1.209	1	0.0098	1	0.02941	0	0	0
PSTPIP2	1	0	1	1	1.209	1	0.0098	1	0.02941	0	0	0
RBP1	1	0	1	1	1.209	1	0.0098	1	0.02941	0	0	0
TTR	1	0	1	1	1.209	1	0.0098	1	0.02941	0	0	0

## Sheet: Supplementary table 6
Supplementary table 6. PPI Network modules predicted by MCOD
Cluster	Score	Nodes	Edges	Nodes (Genes)
Module 1	6	39	114	LMO3, SV2A, NTRK3, EMX2, KIF5A, CACNA1A, GLI2, FGFR1, TENM2, ZIC4, PAX3, KCNH5, CACNA1D, GABRG2, ENC1, GABRA5, BMP4, NEFM, SOX9, DISC1, GRIN2A, FOXG1, CALB1, FKBP5, ZIC1, SGK1, FEZF2, TBR1, CNTN6, SLC17A6, GAD1, ELAVL3, TFAP2A, MAPK10, PAX6, ADCYAP1, KCNJ6, SEMA3A, KCNQ5
Module 2	5	41	100	LEF1, PDE11A, SLC24A2, EMX2, TNFRSF11B, AMHR2, PRL, USH2A, FGFR1, GLI2, SHOX2, FGF9, PDE6G, PAX3, GNAT1, CNGA3, PDE6H, BMP4, PROM1, ITGA6, RUNX2, SOX9, EYS, IMPG2, GRIN2A, ALK, PLCB1, NRL, MAB21L2, TFAP2A, TGFA, PAX6, BOC, DMD, SLC4A8, ZNF521, MAF, MAK, EDIL3, KCNQ5, KCNJ2
Module 3	4	13	24	GRIN2A, RASGRF2, CACNA1A, GPR56, CACNA2D1, CACNA1D, GABRG2, TMEM132C, EDIL3, FKBP10, KCNJ2, CNTNAP5, CACNG3

## Sheet: Supplementary table 7
Supplementary table 7. GO enrichment analysis of the PPI network modules
Module	ONTOLOGY	ID	Description	GeneRatio	BgRatio	pvalue	p.adjust	qvalue	geneID	Count
Module 1	BP	GO:0048839	inner ear development	9/39	192/18670	1.73e-10	2.63e-07	1.51e-07	4916/2736/2260/2558/652/6662/793/7545/7020	9
Module 1	BP	GO:0043583	ear development	9/39	219/18670	5.57e-10	4.24e-07	2.42e-07	4916/2736/2260/2558/652/6662/793/7545/7020	9
Module 1	BP	GO:0007389	pattern specification process	9/39	446/18670	2.62e-07	3.07e-05	1.75e-05	2018/2736/2260/652/7545/55079/10716/5080/10371	9
Module 1	BP	GO:0007409	axonogenesis	9/39	468/18670	3.93e-07	4.27e-05	2.44e-05	4916/3798/2736/27185/55079/10716/27255/5080/10371	9
Module 1	BP	GO:0050769	positive regulation of neurogenesis	9/39	474/18670	4.37e-07	4.44e-05	2.54e-05	4916/2736/2260/652/27185/55079/5080/116/10371	9
Module 1	BP	GO:0090596	sensory organ morphogenesis	8/39	256/18670	4.77e-08	1.17e-05	6.71e-06	2736/2260/652/6662/793/7545/7020/5080	8
Module 1	BP	GO:0045165	cell fate commitment	8/39	270/18670	7.2e-08	1.22e-05	6.95e-06	4916/2736/2260/652/6662/55079/10716/5080	8
Module 1	BP	GO:0003002	regionalization	8/39	351/18670	5.33e-07	4.77e-05	2.73e-05	2018/2736/2260/652/55079/10716/5080/10371	8
Module 1	BP	GO:0042391	regulation of membrane potential	8/39	434/18670	2.61e-06	0.000132587	7.57e-05	4916/773/27133/776/2566/2558/2903/116	8
Module 1	MF	GO:0022839	ion gated channel activity	8/39	334/17697	5.47e-07	3.86e-05	2.32e-05	773/27133/776/2566/2558/2903/3763/56479	8
Module 1	MF	GO:0022836	gated channel activity	8/39	343/17697	6.69e-07	3.86e-05	2.32e-05	773/27133/776/2566/2558/2903/3763/56479	8
Module 1	MF	GO:0005216	ion channel activity	8/39	416/17697	2.83e-06	0.000104707	6.31e-05	773/27133/776/2566/2558/2903/3763/56479	8
Module 1	MF	GO:0022838	substrate-specific channel activity	8/39	428/17697	3.49e-06	0.000104707	6.31e-05	773/27133/776/2566/2558/2903/3763/56479	8
Module 1	MF	GO:0015267	channel activity	8/39	456/17697	5.57e-06	0.00010885	6.56e-05	773/27133/776/2566/2558/2903/3763/56479	8
Module 1	MF	GO:0022803	passive transmembrane transporter activity	8/39	457/17697	5.66e-06	0.00010885	6.56e-05	773/27133/776/2566/2558/2903/3763/56479	8
Module 1	CC	GO:0097060	synaptic membrane	8/38	432/19717	1.37e-06	7.12e-05	3.88e-05	4916/57451/776/2566/2558/27185/2903/27255	8
Module 1	BP	GO:0021537	telencephalon development	7/39	251/18670	7.78e-07	6.58e-05	3.76e-05	2018/652/27185/55079/10716/5080/10371	7
Module 1	BP	GO:0007411	axon guidance	7/39	276/18670	1.47e-06	9.95e-05	5.68e-05	3798/2736/55079/10716/27255/5080/10371	7
Module 1	BP	GO:0097485	neuron projection guidance	7/39	277/18670	1.5e-06	9.95e-05	5.68e-05	3798/2736/55079/10716/27255/5080/10371	7
Module 1	BP	GO:0048562	embryonic organ morphogenesis	7/39	288/18670	1.95e-06	0.000114005	6.51e-05	2736/2260/652/6662/7545/7020/5080	7
Module 1	BP	GO:0072001	renal system development	7/39	293/18670	2.18e-06	0.000118667	6.78e-05	2018/2736/2260/652/6662/793/7020	7
Module 1	BP	GO:0001655	urogenital system development	7/39	330/18670	4.78e-06	0.000196816	0.000112435	2018/2736/2260/652/6662/793/7020	7
Module 1	BP	GO:0045666	positive regulation of neuron differentiation	7/39	371/18670	1.03e-05	0.000363886	0.000207877	4916/2736/2260/652/27185/55079/116	7
Module 1	BP	GO:0048880	sensory system development	7/39	371/18670	1.03e-05	0.000363886	0.000207877	4916/652/6662/793/7020/5080/10371	7
Module 1	BP	GO:0048568	embryonic organ development	7/39	428/18670	2.58e-05	0.000710993	0.000406169	2736/2260/652/6662/7545/7020/5080	7
Module 1	BP	GO:0048732	gland development	7/39	434/18670	2.82e-05	0.000741286	0.000423475	2736/2260/652/6662/5080/116/10371	7
Module 1	BP	GO:0006874	cellular calcium ion homeostasis	7/39	458/18670	3.98e-05	0.000897136	0.000512507	9900/773/776/27185/2903/793/116	7
Module 1	BP	GO:0055074	calcium ion homeostasis	7/39	471/18670	4.75e-05	0.000965624	0.000551633	9900/773/776/27185/2903/793/116	7
Module 1	BP	GO:0072503	cellular divalent inorganic cation homeostasis	7/39	493/18670	6.34e-05	0.00116284	0.000664296	9900/773/776/27185/2903/793/116	7
Module 1	BP	GO:0010975	regulation of neuron projection development	7/39	499/18670	6.84e-05	0.00123984	0.000708283	4916/2260/27185/55079/10716/116/10371	7
Module 1	MF	GO:0001228	DNA-binding transcription activator activity, RNA polymerase II-specific	7/39	439/17697	4.26e-05	0.000737739	0.000444394	2736/6662/7545/55079/10716/7020/5080	7
Module 1	CC	GO:0034702	ion channel complex	7/38	301/19717	1.52e-06	7.12e-05	3.88e-05	773/776/2566/2558/2903/3763/56479	7
Module 1	CC	GO:1902495	transmembrane transporter complex	7/38	324/19717	2.47e-06	8.19e-05	4.46e-05	773/776/2566/2558/2903/3763/56479	7
Module 1	CC	GO:1990351	transporter complex	7/38	332/19717	2.9e-06	8.19e-05	4.46e-05	773/776/2566/2558/2903/3763/56479	7
Module 1	CC	GO:0043025	neuronal cell body	7/38	497/19717	3.97e-05	0.000622354	0.00033917	9900/3798/773/2558/793/5602/116	7
Module 1	BP	GO:0048663	neuron fate commitment	6/39	65/18670	4.19e-09	1.4e-06	8.01e-07	4916/2736/652/55079/10716/5080	6
Module 1	BP	GO:0021872	forebrain generation of neurons	6/39	66/18670	4.6e-09	1.4e-06	8.01e-07	2260/27185/55079/10716/5080/10371	6
Module 1	BP	GO:0001708	cell fate specification	6/39	99/18670	5.4e-08	1.17e-05	6.71e-06	4916/2736/2260/6662/10716/5080	6
Module 1	BP	GO:0022612	gland morphogenesis	6/39	120/18670	1.71e-07	2.16e-05	1.24e-05	2736/2260/652/6662/5080/10371	6
Module 1	BP	GO:0001764	neuron migration	6/39	157/18670	8.33e-07	6.68e-05	3.81e-05	4916/2260/27185/55079/5080/10371	6
Module 1	BP	GO:0021543	pallium development	6/39	172/18670	1.42e-06	9.95e-05	5.68e-05	2018/27185/55079/10716/5080/10371	6
Module 1	BP	GO:0021953	central nervous system neuron differentiation	6/39	183/18670	2.04e-06	0.000114845	6.56e-05	2736/27185/55079/10716/5080/10371	6
Module 1	BP	GO:0001822	kidney development	6/39	278/18670	2.23e-05	0.000652585	0.000372802	2736/2260/652/6662/793/7020	6
Module 1	BP	GO:0050768	negative regulation of neurogenesis	6/39	295/18670	3.11e-05	0.00078937	0.000450944	4916/6662/55079/5080/116/10371	6
Module 1	BP	GO:0043010	camera-type eye development	6/39	314/18670	4.41e-05	0.000945381	0.000540069	4916/652/6662/793/7020/5080	6
Module 1	BP	GO:0051961	negative regulation of nervous system development	6/39	315/18670	4.49e-05	0.000948907	0.000542083	4916/6662/55079/5080/116/10371	6
Module 1	BP	GO:0010721	negative regulation of cell development	6/39	344/18670	7.31e-05	0.0013098	0.00074825	4916/6662/55079/5080/116/10371	6
Module 1	BP	GO:0001654	eye development	6/39	362/18670	9.69e-05	0.00163804	0.000935763	4916/652/6662/793/7020/5080	6
Module 1	BP	GO:0150063	visual system development	6/39	366/18670	0.000102882	0.00172073	0.000983001	4916/652/6662/793/7020/5080	6
Module 1	BP	GO:0050804	modulation of chemical synaptic transmission	6/39	436/18670	0.000266022	0.00334616	0.00191157	773/776/27185/2903/793/116	6
Module 1	BP	GO:0099177	regulation of trans-synaptic signaling	6/39	437/18670	0.000269315	0.00335981	0.00191936	773/776/27185/2903/793/116	6
Module 1	BP	GO:0023061	signal release	6/39	462/18670	0.000362644	0.00414995	0.00237075	9900/773/2260/776/2571/116	6
Module 1	BP	GO:0034765	regulation of ion transmembrane transport	6/39	483/18670	0.000459218	0.00492204	0.00281181	773/27133/776/2903/3763/56479	6
Module 1	MF	GO:0022843	voltage-gated cation channel activity	6/39	142/17697	6.3e-07	3.86e-05	2.32e-05	773/27133/776/2903/3763/56479	6
Module 1	MF	GO:0005244	voltage-gated ion channel activity	6/39	197/17697	4.24e-06	0.000104707	6.31e-05	773/27133/776/2903/3763/56479	6
Module 1	MF	GO:0022832	voltage-gated channel activity	6/39	197/17697	4.24e-06	0.000104707	6.31e-05	773/27133/776/2903/3763/56479	6
Module 1	MF	GO:0005261	cation channel activity	6/39	319/17697	6.47e-05	0.00101715	0.000612702	773/27133/776/2903/3763/56479	6
Module 1	MF	GO:0046873	metal ion transmembrane transporter activity	6/39	438/17697	0.000362517	0.00330979	0.00199373	773/27133/776/2903/3763/56479	6
Module 1	CC	GO:0045211	postsynaptic membrane	6/38	323/19717	3.27e-05	0.000577063	0.000314487	4916/57451/2566/2558/27185/2903	6
Module 1	CC	GO:0033267	axon part	6/38	382/19717	8.31e-05	0.00106509	0.000580453	3798/57451/27185/793/2571/116	6
Module 1	BP	GO:0090102	cochlea development	5/39	51/18670	6.68e-08	1.22e-05	6.95e-06	4916/2736/2558/6662/793	5
Module 1	BP	GO:0021879	forebrain neuron differentiation	5/39	53/18670	8.13e-08	1.24e-05	7.07e-06	27185/55079/10716/5080/10371	5
Module 1	BP	GO:0021536	diencephalon development	5/39	75/18670	4.73e-07	4.5e-05	2.57e-05	2736/652/5080/116/10371	5
Module 1	BP	GO:0042472	inner ear morphogenesis	5/39	98/18670	1.8e-06	0.000109391	6.25e-05	2736/2260/6662/7545/7020	5
Module 1	BP	GO:0021761	limbic system development	5/39	109/18670	3.04e-06	0.000144585	8.26e-05	2018/2260/55079/10716/10371	5
Module 1	BP	GO:0048593	camera-type eye morphogenesis	5/39	112/18670	3.47e-06	0.000160263	9.16e-05	652/6662/793/7020/5080	5
Module 1	BP	GO:0021987	cerebral cortex development	5/39	116/18670	4.13e-06	0.000184843	0.000105595	2018/27185/10716/5080/10371	5
Module 1	BP	GO:0042471	ear morphogenesis	5/39	118/18670	4.49e-06	0.000195284	0.00011156	2736/2260/6662/7545/7020	5
Module 1	BP	GO:0035270	endocrine system development	5/39	127/18670	6.44e-06	0.000257807	0.000147277	2736/652/6662/5080/116	5
Module 1	BP	GO:0007605	sensory perception of sound	5/39	145/18670	1.23e-05	0.000424532	0.000242522	2260/5077/776/2558/7020	5
Module 1	BP	GO:0061351	neural precursor cell proliferation	5/39	147/18670	1.31e-05	0.000438908	0.000250735	2018/2260/27185/5080/116	5
Module 1	BP	GO:0035107	appendage morphogenesis	5/39	148/18670	1.36e-05	0.000438908	0.000250735	2736/2260/652/6662/7020	5
Module 1	BP	GO:0035108	limb morphogenesis	5/39	148/18670	1.36e-05	0.000438908	0.000250735	2736/2260/652/6662/7020	5
Module 1	BP	GO:0048592	eye morphogenesis	5/39	149/18670	1.4e-05	0.000444012	0.000253651	652/6662/793/7020/5080	5
Module 1	BP	GO:0050954	sensory perception of mechanical stimulus	5/39	165/18670	2.29e-05	0.000657919	0.00037585	2260/5077/776/2558/7020	5
Module 1	BP	GO:0048736	appendage development	5/39	179/18670	3.39e-05	0.000805325	0.000460058	2736/2260/652/6662/7020	5
Module 1	BP	GO:0060173	limb development	5/39	179/18670	3.39e-05	0.000805325	0.000460058	2736/2260/652/6662/7020	5
Module 1	BP	GO:0061138	morphogenesis of a branching epithelium	5/39	182/18670	3.67e-05	0.000858532	0.000490454	2736/2260/652/6662/10371	5
Module 1	BP	GO:0050770	regulation of axonogenesis	5/39	183/18670	3.76e-05	0.000867955	0.000495837	4916/27185/55079/10716/10371	5
Module 1	BP	GO:0001763	morphogenesis of a branching structure	5/39	196/18670	5.22e-05	0.000993111	0.000567335	2736/2260/652/6662/10371	5
Module 1	BP	GO:0050920	regulation of chemotaxis	5/39	217/18670	8.45e-05	0.00146199	0.00083519	4916/2260/55079/10716/10371	5
Module 1	BP	GO:0009952	anterior/posterior pattern specification	5/39	219/18670	8.83e-05	0.00150947	0.000862314	2018/2736/652/55079/5080	5
Module 1	BP	GO:0060560	developmental growth involved in morphogenesis	5/39	235/18670	0.00012295	0.00195697	0.00111796	4916/652/6662/27185/10371	5
Module 1	BP	GO:0006813	potassium ion transport	5/39	240/18670	0.000135687	0.00205813	0.00117575	27133/776/116/3763/56479	5
Module 1	BP	GO:0007611	learning or memory	5/39	256/18670	0.000183345	0.00263256	0.0015039	2558/2903/793/6446/10716	5
Module 1	BP	GO:0006836	neurotransmitter transport	5/39	269/18670	0.000230719	0.00295561	0.00168845	9900/776/57084/2571/116	5
Module 1	BP	GO:0042063	gliogenesis	5/39	290/18670	0.000326318	0.00379759	0.00216945	4916/6662/27185/5080/116	5
Module 1	BP	GO:0050890	cognition	5/39	296/18670	0.000358474	0.00413332	0.00236124	2558/2903/793/6446/10716	5
Module 1	BP	GO:0010769	regulation of cell morphogenesis involved in differentiation	5/39	301/18670	0.000387061	0.00433167	0.00247456	4916/27185/55079/10716/10371	5
Module 1	BP	GO:0048638	regulation of developmental growth	5/39	347/18670	0.000738217	0.00673873	0.00384964	4916/2260/652/27185/10371	5
Module 1	BP	GO:0051480	regulation of cytosolic calcium ion concentration	5/39	357/18670	0.000838757	0.00729479	0.0041673	773/776/2903/793/116	5
Module 1	BP	GO:0031346	positive regulation of cell projection organization	5/39	383/18670	0.00114809	0.0084825	0.0048458	4916/2260/57451/27185/116	5
Module 1	BP	GO:0048608	reproductive structure development	5/39	431/18670	0.00193194	0.0125124	0.00714797	2736/652/6662/116/10371	5
Module 1	BP	GO:0061458	reproductive system development	5/39	434/18670	0.00199136	0.0128147	0.00732068	2736/652/6662/116/10371	5
Module 1	BP	GO:0016049	cell growth	5/39	484/18670	0.00319165	0.0177288	0.0101279	4916/6662/27185/6446/10371	5
Module 1	BP	GO:0022604	regulation of cell morphogenesis	5/39	484/18670	0.00319165	0.0177288	0.0101279	4916/27185/55079/10716/10371	5
Module 1	CC	GO:0099240	intrinsic component of synaptic membrane	5/38	164/19717	1.51e-05	0.000303292	0.000165288	4916/776/2558/2903/27255	5
Module 1	CC	GO:0034703	cation channel complex	5/38	220/19717	6.14e-05	0.000866438	0.000472191	773/776/2903/3763/56479	5
Module 1	CC	GO:0150034	distal axon	5/38	285/19717	0.000206901	0.00224408	0.00122298	57451/27185/793/2571/116	5
Module 1	CC	GO:0098978	glutamatergic synapse	5/38	349/19717	0.000524413	0.00412467	0.00224786	9900/4916/2903/793/5602	5
Module 1	BP	GO:0021871	forebrain regionalization	4/39	24/18670	1.68e-07	2.16e-05	1.24e-05	2018/652/55079/5080	4
Module 1	BP	GO:0021983	pituitary gland development	4/39	42/18670	1.72e-06	0.000108968	6.23e-05	2736/652/5080/116	4
Module 1	BP	GO:0035272	exocrine system development	4/39	48/18670	2.96e-06	0.000144585	8.26e-05	2260/6662/5080/10371	4
Module 1	BP	GO:0021885	forebrain cell migration	4/39	59/18670	6.81e-06	0.000265801	0.000151844	2018/27185/55079/10371	4
Module 1	BP	GO:0042490	mechanoreceptor differentiation	4/39	61/18670	7.79e-06	0.000289037	0.000165118	4916/2260/2558/652	4
Module 1	BP	GO:0048645	animal organ formation	4/39	61/18670	7.79e-06	0.000289037	0.000165118	2736/2260/652/10716	4
Module 1	BP	GO:0021954	central nervous system neuron development	4/39	78/18670	2.07e-05	0.000631534	0.000360777	2736/27185/55079/10371	4
Module 1	BP	GO:0110110	positive regulation of animal organ morphogenesis	4/39	81/18670	2.41e-05	0.000678979	0.000387881	2260/652/6662/7020	4
Module 1	BP	GO:2000177	regulation of neural precursor cell proliferation	4/39	88/18670	3.34e-05	0.000805325	0.000460058	2736/27185/5080/116	4
Module 1	BP	GO:0001657	ureteric bud development	4/39	97/18670	4.9e-05	0.00096815	0.000553076	2260/652/6662/793	4
Module 1	BP	GO:0072163	mesonephric epithelium development	4/39	98/18670	5.1e-05	0.000982322	0.000561172	2260/652/6662/793	4
Module 1	BP	GO:0072164	mesonephric tubule development	4/39	98/18670	5.1e-05	0.000982322	0.000561172	2260/652/6662/793	4
[truncated: 733 more rows]

## Sheet: Supplementary table 8
Supplementary table 8. Comparison of immune score, stromal score and tumor purity between different risk groups
[truncated: 12 more rows]

[truncated: 4 more sheets: Supplementary table 9, Supplementary table 10, Supplementary table 11, Supplementary table 12]
